# Supplementary material for: Magnetic iron-based waterworks sludge modified by chitosan and FeS for aqueous Cr(vi) adsorption and reduction
Source: Royal Society of Chemistry journal article supplement (doi:10.1039/d4ra02852j), 2024-01-01

| MIBWS dosage (g) | adsorption capacity(mg/g) | (Er±)       |
|------------------|---------------------------|-------------|
| 0.5              | 77.13                     | 0.844624968 |
| 0.75             | 61.92                     | 0.646611139 |
| 1                | 50.47                     | 0.74065068  |
| 1.25             | 41.47                     | 0.244655835 |

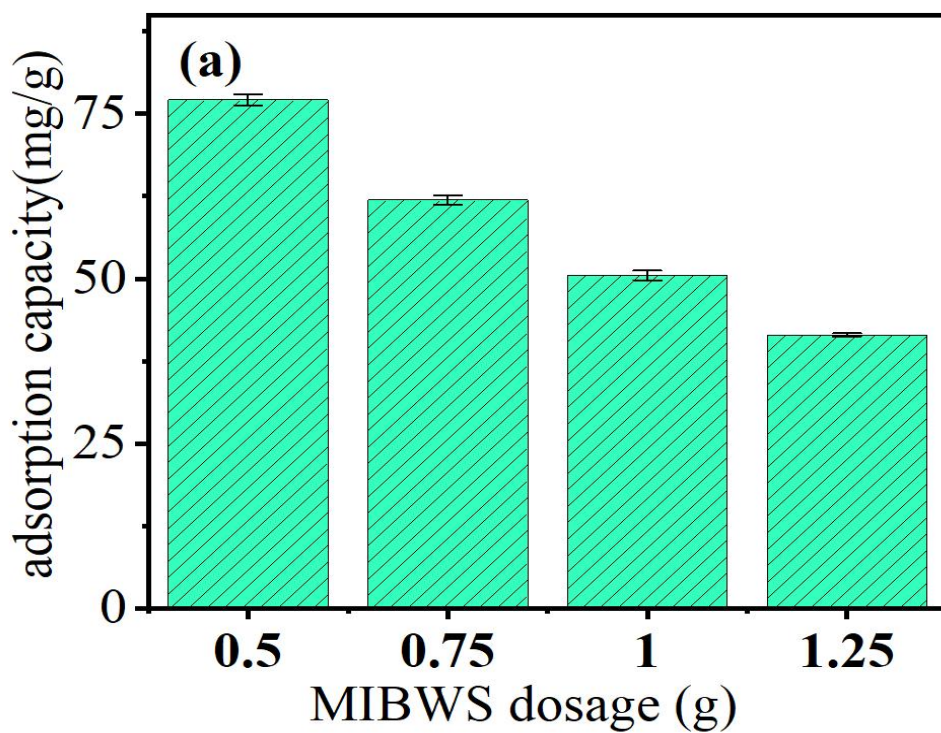

| Field (G) | FeS@CMIS0.75  | Field (G) | FeS@CMIS1    | Field (G) | FeS@CMIS1    | Field (G) | FeS@CMIS1.25 |
|-----------|---------------|-----------|--------------|-----------|--------------|-----------|--------------|
| -18947.8  | -7.23473913   | -19206.6  | -0.46835896  | -19125.2  | -7.735038168 | -19954    | -14.89       |
| -18967.3  | -7.23473913   | -19233.9  | -0.468358382 | -19068    | -7.734923664 | -19232.7  | -14.88812121 |
| -19351.8  | -7.234347826  | -18937.7  | -0.468353179 | -19947.4  | -7.734618321 | -19210.4  | -14.88793939 |
| -19375.9  | -7.234304348  | -18746.9  | -0.468336416 | -18851.9  | -7.734351145 | -18954.2  | -14.886      |
| -18466    | -7.23426087   | -18430.2  | -0.468284393 | -18595.7  | -7.733358779 | -18764.8  | -14.88418182 |
| -18431.1  | -7.234173913  | -19965.1  | -0.468256647 | -18379.1  | -7.732251908 | -18446.2  | -14.88036364 |
| -17985.3  | -7.2252652174 | -18216.8  | -0.468232327 | -18067.4  | -7.730267176 | -18234.3  | -14.87727273 |
| -17908.1  | -7.232304348  | -17962.3  | -0.468152601 | -17893.6  | -7.728931298 | -17979    | -14.8730303  |
| -19993.8  | -7.232173913  | -17692.9  | -0.468047977 | -17544.7  | -7.725763359 | -17710.1  | -14.86787879 |
| -17494.2  | -7.229913043  | -17468.8  | -0.467943931 | -17398.9  | -7.724236641 | -17487.1  | -14.8630303  |
| -17386.3  | -7.229130435  | -17174.3  | -0.467784971 | -17024.5  | -7.719847328 | -17191.1  | -14.85593939 |
| -16997.9  | -7.225869565  | -16973.2  | -0.46766185  | -16903.7  | -7.718282443 | -16990.7  | -14.85066667 |
| -16868.1  | -7.224608696  | -16656.6  | -0.467443353 | -16508.7  | -7.712557252 | -16673.6  | -14.84151515 |
| -16501.2  | -7.220608696  | -16477.5  | -0.467306358 | -16407.3  | -7.710992366 | -16493.9  | -14.83593939 |
| -16350.4  | -7.21873913   | -16140.4  | -0.467023121 | -15992.9  | -7.703854962 | -16157.5  | -14.82460606 |
| -16002.7  | -7.214043478  | -15979.2  | -0.466875145 | -15909.1  | -7.702328244 | -15997.5  | -14.81884848 |
| -15857.5  | -7.211869565  | -15637.9  | -0.466535838 | -15494.6  | -7.694083969 | -15648.8  | -14.80539394 |
| -15506.8  | -7.20626087   | -15481.3  | -0.466368208 | -15410.6  | -7.692328244 | -15499    | -14.79927273 |
| -15331.4  | -7.20326087   | -15136.2  | -0.465971676 | -14979.8  | -7.682633588 | -15151.4  | -14.78424242 |
| -15005.9  | -7.197434783  | -14981.7  | -0.465781503 | -14912.1  | -7.681068702 | -14999    | -14.77727273 |
| -14813.9  | -7.193826087  | -14604.2  | -0.465286705 | -14457.4  | -7.670038168 | -14621    | -14.75915152 |
| -14507    | -7.187173913  | -14480.5  | -0.465113873 | -14410.3  | -7.668854962 | -14498.3  | -14.75284848 |
| -14303.2  | -7.182782609  | -14094.4  | -0.46455896  | -13949    | -7.656793893 | -14111.1  | -14.73260606 |
| -14003.1  | -7.174521739  | -13980.5  | -0.464384971 | -13910.3  | -7.655725191 | -13996.9  | -14.72624242 |
| -13794.6  | -7.168913043  | -13585.2  | -0.463762428 | -13438.7  | -7.642137405 | -13602.2  | -14.70369697 |
| -13502.8  | -7.160130435  | -13467.8  | -0.463567052 | -13391.9  | -7.640725191 | -13481.4  | -14.69648485 |
| -13284.5  | -7.153521739  | -13076.5  | -0.462901734 | -12931.6  | -7.626374046 | -13094.6  | -14.67272727 |
| -12975.4  | -7.143391304  | -12962.4  | -0.462699422 | -12892.5  | -7.625114504 | -12982.9  | -14.66569697 |
| -12778.6  | -7.136782609  | -12569.8  | -0.461984393 | -12423    | -7.609541985 | -12585.8  | -14.63975758 |
| -12498.8  | -7.127086957  | -12474.6  | -0.461807514 | -12402.7  | -7.608854962 | -12491.7  | -14.63351515 |
| -12268.4  | -7.118782609  | -12061.8  | -0.461013295 | -11916.2  | -7.592022901 | -12078    | -14.60515152 |
| -11995.7  | -7.109043478  | -11971    | -0.460836416 | -11901.3  | -7.591526718 | -11989.4  | -14.5990303  |
| -11762.6  | -7.100347826  | -11554.1  | -0.459995954 | -11409.1  | -7.574007634 | -11570    | -14.5689697  |
| -11492.3  | -7.090521739  | -11468.5  | -0.459822543 | -11397.4  | -7.573587786 | -11486.8  | -14.5630303  |
| -11254.4  | -7.081521739  | -11047.5  | -0.458942197 | -10900.1  | -7.555419847 | -11063.1  | -14.53157576 |
| -10989.6  | -7.071826087  | -10964.8  | -0.458769364 | -10894.1  | -7.555229008 | -10982.5  | -14.52557576 |
| -10747.9  | -7.06273913   | -10538.8  | -0.457855491 | -10395.2  | -7.536526718 | -10555.9  | -14.49284848 |
| -10486.4  | -7.053130435  | -10462.4  | -0.457693064 | -10393.1  | -7.536450382 | -10478.8  | -14.48684848 |
| -10245.8  | -7.044173913  | -10046.5  | -0.456781503 | -9911.62  | -7.517824427 | -10059.3  | -14.45351515 |
| -9983.41  | -7.034521739  | -9958.68  | -0.456584393 | -9887.21  | -7.516870229 | -9976.5   | -14.44684848 |
| -9752.57  | -7.026043478  | -9535.66  | -0.455637572 | -9385.9   | -7.496870229 | -9557     | -14.41236364 |
| -9480.55  | -7.015956522  | -9456.73  | -0.455454913 | -9384.75  | -7.496793893 | -9473.89  | -14.40539394 |
| -9225.75  | -7.006391304  | -9016.94  | -0.45443237  | -8881.64  | -7.476145038 | -9033.23  | -14.36751515 |
| -8977.31  | -6.99673913   | -8952.39  | -0.454286127 | -8872.45  | -7.475801527 | -8970.47  | -14.36193939 |
| -8718.62  | -6.986304348  | -8510.41  | -0.453212717 | -8380.26  | -7.454503817 | -8526.72  | -14.32206061 |
| -8475.63  | -6.976130435  | -8450.04  | -0.453059538 | -8364.56  | -7.453816794 | -8466.71  | -14.31666667 |
| -8211.89  | -6.964478261  | -8003.11  | -0.451887861 | -7875.61  | -7.431145038 | -8020.47  | -14.27357576 |
| -7965.32  | -6.95326087   | -7926.34  | -0.451680347 | -7858.47  | -7.430343511 | -7964.96  | -14.26793939 |
| -7705.06  | -6.940956522  | -7496.49  | -0.450463584 | -7350.35  | -7.404732824 | -7513.06  | -14.2210303  |
| -7447.36  | -6.928347826  | -7437.46  | -0.450289017 | -7341.6   | -7.404274809 | -7435.51  | -14.21278788 |
| -7197.1   | -6.915608696  | -6988.13  | -0.448895376 | -6869.16  | -7.377977099 | -7005.81  | -14.16412121 |
| -6964.61  | -6.903478261  | -6940.09  | -0.44873815  | -6842.73  | -7.376412214 | -6957.32  | -14.15842424 |
| -6690.6   | -6.888521739  | -6482.88  | -0.447173988 | -6365.22  | -7.348091603 | -6499.19  | -14.10187879 |
| -6461.74  | -6.875347826  | -6437.1   | -0.447006936 | -6337.16  | -7.34629771  | -6454.43  | -14.09612121 |
| -6182.8   | -6.858521739  | -5974.78  | -0.445206936 | -5862.3   | -7.315381679 | -5990.44  | -14.03260606 |
| -5956.94  | -6.844130435  | -5932.75  | -0.445030058 | -5829.52  | -7.313091603 | -5950.24  | -14.02666667 |
| -5675.9   | -6.825217391  | -5467.32  | -0.442952601 | -5359.34  | -7.279007634 | -5483.98  | -13.95387879 |
| -5453.69  | -6.809086957  | -5429.96  | -0.442783815 | -5321.38  | -7.276183206 | -5447.01  | -13.94781818 |
| -5173.61  | -6.787304348  | -5038.89  | -0.440811561 | -4997.49  | -7.249580153 | -5046.36  | -13.87666667 |
| -4997.22  | -6.772521739  | -4977.15  | -0.440483237 | -4968.85  | -7.247251908 | -4999.42  | -13.86793939 |
| -4946.44  | -6.768043478  | -4948.67  | -0.440325434 | -4891.32  | -7.240419847 | -4942.13  | -13.85678788 |
| -4767.73  | -6.75226087   | -4811.32  | -0.439550289 | -4790.27  | -7.231183206 | -4777.37  | -13.82387879 |
| -4759.09  | -6.751478261  | -4697.04  | -0.438918497 | -4653.89  | -7.218740458 | -4745.11  | -13.81757576 |
| -4568.11  | -6.733565217  | -4612.52  | -0.438423121 | -4593.37  | -7.213282443 | -4576.65  | -13.78278788 |
| -4563.69  | -6.733130435  | -4497.51  | -0.437718497 | -4453.91  | -7.199465649 | -4552.06  | -13.77745455 |
| -4372.46  | -6.714521739  | -4421.99  | -0.437255491 | -4402.91  | -7.194274809 | -4377.12  | -13.73957576 |
| -4368.37  | -6.714130435  | -4296.82  | -0.436475723 | -4253.93  | -7.179351145 | -4362.18  | -13.73636364 |
| -4182.21  | -6.695        | -4231.02  | -0.436043931 | -4211.87  | -7.17480916  | -4176.98  | -13.69406061 |
| -4168.42  | -6.693521739  | -4097.48  | -0.435152023 | -4053.64  | -7.157328244 | -4171.05  | -13.69266667 |
| -3991.54  | -6.674608696  | -4040.9   | -0.434777457 | -4022.22  | -7.154083969 | -3981.45  | -13.64842424 |
| -3964.49  | -6.671608696  | -3896.74  | -0.433766474 | -3850.05  | -7.134541985 | -3973.31  | -13.64642424 |
| -3801.59  | -6.653304348  | -3850.43  | -0.433424855 | -3831.56  | -7.132290076 | -3790.46  | -13.60127273 |
| -3764.4   | -6.648869565  | -3687.55  | -0.432196532 | -3648.13  | -7.109541985 | -3771.28  | -13.59630303 |

|          |              |          |              |          |              |          |              |
|----------|--------------|----------|--------------|----------|--------------|----------|--------------|
| -3610.89 | -6.629782609 | -3659.66 | -0.431971676 | -3641.43 | -7.108664122 | -3600.27 | -13.55066667 |
| -3568.23 | -6.624521739 | -3496.7  | -0.43060289  | -3453.68 | -7.082328244 | -3577.66 | -13.54424242 |
| -3420.11 | -6.604565217 | -3469.11 | -0.430365896 | -3449.98 | -7.081793893 | -3409.29 | -13.49539394 |
| -3368.2  | -6.597086957 | -3297    | -0.428837572 | -3260.32 | -7.053587786 | -3377.01 | -13.48545455 |
| -3229.97 | -6.576652174 | -3278.9  | -0.428668208 | -3254.09 | -7.05259542  | -3219.02 | -13.43587879 |
| -3168.21 | -6.567       | -3097.55 | -0.42692659  | -3069.47 | -7.022442748 | -3177.19 | -13.42254545 |
| -3039.02 | -6.545956522 | -3088.16 | -0.42683815  | -3054.36 | -7.02        | -3029.04 | -13.37272727 |
| -2968.4  | -6.534652174 | -2902.11 | -0.424834682 | -2886.45 | -6.988969466 | -2977.24 | -13.35509091 |
| -2857.94 | -6.515130435 | -2897.13 | -0.424777457 | -2853.98 | -6.982938931 | -2840.16 | -13.30551515 |
| -2768.28 | -6.498043478 | -2713.2  | -0.422646821 | -2690.38 | -6.949389313 | -2777.13 | -13.28084848 |
| -2658.26 | -6.476869565 | -2696.87 | -0.422436416 | -2653.97 | -6.941030534 | -2655.12 | -13.23151515 |
| -2568.41 | -6.458347826 | -2516.69 | -0.420060116 | -2498.14 | -6.903778626 | -2577.29 | -13.19921212 |
| -2467.66 | -6.435521739 | -2497.3  | -0.419773988 | -2454    | -6.892778626 | -2457.43 | -13.14345455 |
| -2367.91 | -6.411565217 | -2326.67 | -0.417196532 | -2307.55 | -6.85278626  | -2377.13 | -13.10290909 |
| -2277.59 | -6.388347826 | -2296.76 | -0.416686127 | -2253.87 | -6.835877863 | -2266.81 | -13.04345455 |
| -2168.1  | -6.357695652 | -2136.11 | -0.413877457 | -2117.41 | -6.790687023 | -2176.56 | -12.99236364 |
| -2087.18 | -6.333347826 | -2096.91 | -0.413106936 | -2052.81 | -6.768206107 | -2076.58 | -12.92830303 |
| -1896.79 | -6.278782609 | -1945.87 | -0.409895376 | -1926.86 | -6.718129771 | -1991.63 | -12.84509091 |
| -1969.96 | -6.264304348 | -1904    | -0.40747341  | -1871.82 | -6.693167939 | -1885.68 | -12.77715152 |
| -1842.75 | -6.214391304 | -1755    | -0.405404624 | -1759.67 | -6.639732824 | -1877.99 | -12.75733333 |
| -1706.05 | -6.207173913 | -1783.64 | -0.404502312 | -1736.32 | -6.627328244 | -1778.6  | -12.67351515 |
| -1737.4  | -6.174478261 | -1682.99 | -0.401836416 | -1662.87 | -6.587900763 | -1695.94 | -12.63278788 |
| -1642.16 | -6.126652174 | -1564.04 | -0.399791908 | -1563.93 | -6.528167939 | -1681.35 | -12.58666667 |
| -1515.58 | -6.099130435 | -1585.74 | -0.398353757 | -1545.34 | -6.515610687 | -1581.24 | -12.48387879 |
| -1542.11 | -6.069173913 | -1485.47 | -0.394508671 | -1463.74 | -6.459503817 | -1504.92 | -12.44133333 |
| -1451.01 | -6.010565217 | -1374.5  | -0.392824855 | -1368.4  | -6.38389313  | -1483.07 | -12.36575758 |
| -1397.25 | -5.984478261 | -1386.59 | -0.39054104  | -1355.48 | -6.372824427 | -1420.46 | -12.28151515 |
| -1324.86 | -5.980173913 | -1322.21 | -0.387530636 | -1310.95 | -6.336183206 | -1370.4  | -12.224      |
| -1347.24 | -5.948782609 | -1272.13 | -0.384960116 | -1260.94 | -6.288625954 | -1314.49 | -12.20351515 |
| -1297.36 | -5.908826087 | -1183.86 | -0.383849711 | -1164.93 | -6.255534351 | -1320.46 | -12.14327273 |
| -1247.27 | -5.863782609 | -1222.31 | -0.382210405 | -1211.02 | -6.240954198 | -1270.34 | -12.06454545 |
| -1134.59 | -5.82326087  | -1172.26 | -0.379143931 | -1160.79 | -6.134885496 | -1220.35 | -11.97769697 |
| -1197.36 | -5.816130435 | -1122.22 | -0.375695954 | -1111.03 | -6.078587786 | -1170.59 | -11.8930303  |
| -1147.24 | -5.766       | -1039.82 | -0.374118497 | -1001.57 | -6.056908397 | -1124    | -11.89248485 |
| -1096.33 | -5.707869565 | -1072.26 | -0.37236763  | -1060.89 | -6.013931298 | -1118.43 | -11.78054545 |
| -1045.82 | -5.647       | -1020.37 | -0.368069942 | -1010.52 | -5.94148855  | -1069.99 | -11.66272727 |
| -982.257 | -5.646304348 | -948.545 | -0.367134104 | -906.494 | -5.915992366 | -975.562 | -11.56030303 |
| -997.302 | -5.581086957 | -971.589 | -0.36385896  | -959.075 | -5.862633588 | -1020.4  | -11.55581818 |
| -888.034 | -5.517217391 | -864.965 | -0.359098844 | -910.868 | -5.779160305 | -970.444 | -11.42224242 |
| -947.12  | -5.506608696 | -922.204 | -0.359068208 | -818.591 | -5.760114504 | -881.613 | -11.31260606 |
| -897.356 | -5.419695652 | -816.452 | -0.353923699 | -861.024 | -5.684656489 | -920.474 | -11.28163636 |
| -802.725 | -5.374478261 | -872.27  | -0.353782659 | -766.055 | -5.654274809 | -870.478 | -11.12278788 |
| -847.375 | -5.325304348 | -766.252 | -0.348556069 | -811.045 | -5.576183206 | -799.449 | -11.04412121 |
| -751.535 | -5.262434783 | -822.186 | -0.34782659  | -715.995 | -5.548129771 | -820.577 | -10.94381818 |
| -797.221 | -5.224521739 | -716.386 | -0.342204624 | -760.969 | -5.453778626 | -750.01  | -10.86230303 |
| -701.688 | -5.152043478 | -772.299 | -0.341051445 | -665.941 | -5.434618321 | -770.405 | -10.73939394 |
| -747.293 | -5.106217391 | -666.344 | -0.335546821 | -711.006 | -5.31759542  | -700.146 | -10.66787879 |
| -651.777 | -5.042173913 | -722.293 | -0.333381503 | -616.001 | -5.296755725 | -720.456 | -10.52187879 |
| -697.292 | -4.968130435 | -616.318 | -0.327693064 | -660.996 | -5.159389313 | -650.032 | -10.45193939 |
| -601.641 | -4.910521739 | -672.166 | -0.324616185 | -566.075 | -5.145916031 | -670.38  | -10.26242424 |
| -647.183 | -4.818695652 | -566.33  | -0.319297688 | -515.928 | -4.990572519 | -599.979 | -10.20963636 |
| -551.729 | -4.764043478 | -622.193 | -0.314294798 | -610.825 | -4.972824427 | -620.534 | -9.957757576 |
| -597.269 | -4.623782609 | -516.318 | -0.309821387 | -466.099 | -4.801068702 | -550.062 | -9.937575758 |
| -501.773 | -4.608086957 | -572.399 | -0.302295954 | -560.993 | -4.755648855 | -499.983 | -9.631030303 |
| -451.628 | -4.438521739 | -466.425 | -0.299438728 | -415.867 | -4.598358779 | -569.949 | -9.597090909 |
| -547.293 | -4.412217391 | -522.154 | -0.28772659  | -511.111 | -4.50148855  | -449.962 | -9.290484848 |
| -401.699 | -4.22836087  | -416.475 | -0.287108092 | -366.136 | -4.362442748 | -518.299 | -9.150121212 |
| -494.116 | -4.143234783 | -368.813 | -0.273807514 | -459.328 | -4.188129771 | -399.977 | -8.897878788 |
| -351.637 | -4.005643478 | -472.123 | -0.270411561 | -317.619 | -4.111335878 | -470.333 | -8.651333333 |
| -447.255 | -3.873165217 | -335.805 | -0.261931214 | -280.532 | -3.863244275 | -350.051 | -8.446060606 |
| -304.118 | -3.766673913 | -327.603 | -0.258865318 | -409.877 | -3.837175573 | -420.274 | -8.016424242 |
| -271.292 | -3.543908696 | -317.661 | -0.25529422  | -270.574 | -3.79071374  | -302.535 | -7.964787879 |
| -397.092 | -3.532113043 | -307.75  | -0.251747399 | -260.619 | -3.723209924 | -271.71  | -7.545393939 |
| -263.096 | -3.486778261 | -419.621 | -0.248906936 | -250.631 | -3.653515267 | -263.423 | -7.43430303  |
| -253.103 | -3.422195652 | -297.708 | -0.248213295 | -240.674 | -3.566080153 | -370.565 | -7.321515152 |
| -243.205 | -3.357078261 | -287.707 | -0.244545087 | -230.889 | -3.494820611 | -253.41  | -7.303393939 |
| -233.145 | -3.290795652 | -277.713 | -0.240501734 | -360.921 | -3.432041985 | -243.344 | -7.172545455 |
| -352.281 | -3.236130435 | -267.843 | -0.236765318 | -220.689 | -3.423179389 | -233.332 | -7.042181818 |
| -223.142 | -3.221573913 | -257.689 | -0.232821387 | -210.739 | -3.347576336 | -346.248 | -7.020666667 |
| -213.301 | -3.150334783 | -247.815 | -0.228613295 | -200.731 | -3.271320611 | -223.504 | -6.91169697  |
| -338.007 | -3.133078261 | -372.137 | -0.225695376 | -190.686 | -3.193660305 | -336.161 | -6.844848485 |
| -203.211 | -3.075695652 | -237.856 | -0.224438728 | -181.314 | -3.117660305 | -213.376 | -6.767636364 |
| -328.11  | -3.044182609 | -228.252 | -0.220442775 | -170.846 | -3.03210687  | -326.195 | -6.658909091 |
| -193.156 | -3.001782609 | -217.705 | -0.215476879 | -310.721 | -2.946591603 | -203.454 | -6.62169697  |

|           |              |          |              |          |              |          |              |
|-----------|--------------|----------|--------------|----------|--------------|----------|--------------|
| -318.104  | -2.951521739 | -207.782 | -0.210891908 | -160.763 | -2.946492366 | -193.408 | -6.474181818 |
| -183.209  | -2.929182609 | -197.686 | -0.206014451 | -150.869 | -2.864290076 | -316.134 | -6.458848485 |
| -308.051  | -2.858882609 | -187.774 | -0.201264474 | -140.775 | -2.790301527 | -183.359 | -6.321272727 |
| -173.407  | -2.853104348 | -322.085 | -0.196800578 | -130.82  | -2.695717557 | -306.049 | -6.255636364 |
| -163.602  | -2.77246087  | -177.744 | -0.196051445 | -120.751 | -2.597370229 | -173.768 | -6.163575758 |
| -298.023  | -2.76313913  | -167.704 | -0.190799422 | -110.678 | -2.501282443 | -296.153 | -6.050121212 |
| -153.208  | -2.68736087  | -157.679 | -0.185500578 | -262.568 | -2.479835878 | -163.65  | -5.999406061 |
| -288.108  | -2.660143478 | -147.749 | -0.179946243 | -100.76  | -2.399541985 | -153.407 | -5.831084848 |
| -143.079  | -2.601808696 | -137.679 | -0.174175145 | -243.553 | -2.310732824 | -285.743 | -5.818842424 |
| -277.98   | -2.559243478 | -276.866 | -0.171728324 | -90.8688 | -2.296416031 | -143.396 | -5.658109091 |
| -133.351  | -2.512734783 | -127.826 | -0.168295954 | -233.41  | -2.189416031 | -275.829 | -5.594981818 |
| -267.481  | -2.450843478 | -262.208 | -0.163330058 | -80.7748 | -2.184843511 | -133.471 | -5.47510303  |
| -123.041  | -2.423208696 | -118.066 | -0.162180347 | -71.0216 | -2.074637405 | -266.236 | -5.370927273 |
| -258.093  | -2.348265217 | -252.159 | -0.155977457 | -223.46  | -2.064530534 | -123.355 | -5.2884      |
| -113.272  | -2.333386957 | -107.77  | -0.155710983 | -60.9572 | -1.96171374  | -256.16  | -5.134969697 |
| -247.973  | -2.238386957 | -97.6416 | -0.149215029 | -213.462 | -1.936248092 | -113.423 | -5.105333333 |
| -103.171  | -2.237317391 | -242.113 | -0.148341618 | -50.7175 | -1.842408397 | -103.403 | -4.909145455 |
| -93.2483  | -2.14086087  | -87.6923 | -0.142621965 | -203.412 | -1.804179389 | -246.075 | -4.887775758 |
| -238.069  | -2.123847826 | -232.101 | -0.140483237 | -40.7464 | -1.721236641 | -93.5343 | -4.706709091 |
| -83.1611  | -2.041930435 | -77.7464 | -0.135695954 | -193.476 | -1.671141221 | -235.972 | -4.6318      |
| -228.119  | -2.006221739 | -222.139 | -0.132498266 | -30.6957 | -1.596022901 | -83.3837 | -4.499975758 |
| -173.1947 | -1.93763913  | -67.7183 | -0.128453179 | -183.497 | -1.533072519 | -226.142 | -4.372563636 |
| -218.078  | -1.887243478 | -212.209 | -0.124185549 | -20.8315 | -1.464847328 | -73.5115 | -4.287072727 |
| -63.6298  | -1.839382609 | -57.7696 | -0.120684393 | -172.831 | -1.391019084 | -216.302 | -4.106593939 |
| -207.988  | -1.765926087 | -201.917 | -0.115731214 | -10.7381 | -1.336179389 | -64.1067 | -4.077212121 |
| -53.3434  | -1.725095652 | -47.7495 | -0.113188439 | -163.581 | -1.256698473 | -53.4358 | -3.83430303  |
| -198.074  | -1.640965217 | -191.902 | -0.106989595 | -0.81815 | -1.196267176 | -206.197 | -3.827018182 |
| -43.2748  | -1.610286957 | -37.6518 | -0.105331792 | -153.539 | -1.115278626 | -43.2808 | -3.597642424 |
| -188.09   | -1.516086957 | -182.186 | -0.098563584 | 9.22557  | -1.050282443 | -196.227 | -3.542218182 |
| -33.2635  | -1.495582609 | -27.7842 | -0.097093642 | -143.431 | -0.969240458 | -33.526  | -3.356521212 |
| -178.043  | -1.386282609 | -172.207 | -0.08985896  | 19.2387  | -0.904958015 | -186.116 | -3.257727273 |
| -23.2976  | -1.374591304 | -18.2876 | -0.089228902 | -133.524 | -0.823377863 | -23.5524 | -3.102624242 |
| -167.88   | -1.255195652 | -162.103 | -0.080627168 | 29.4091  | -0.754958015 | -176.244 | -2.966963636 |
| -13.2606  | -1.248247826 | -7.74875 | -0.079983815 | -123.494 | -0.674843511 | -13.5052 | -2.839921212 |
| -3.23438  | -1.1192      | -152.163 | -0.071548555 | 38.8793  | -0.615137405 | -165.592 | -2.654987879 |
| -157.732  | -1.118804348 | 2.29748  | -0.070948555 | -113.532 | -0.529374046 | -3.40727 | -2.565678788 |
| -148.077  | -0.988078261 | -142.204 | -0.062379191 | 48.9841  | -0.462377863 | -156.169 | -2.364       |
| 6.72112   | -0.985586957 | 12.3475  | -0.061494798 | -103.476 | -0.380174046 | 6.54544  | -2.278545455 |
| -138.043  | -0.85163913  | -132.135 | -0.05281659  | 59.2006  | -0.313733206 | -146.106 | -2.055472727 |
| 16.7334   | -0.847069565 | 22.3242  | -0.052194277 | -93.4897 | -0.23105458  | 16.6078  | -1.986278788 |
| -127.989  | -0.714165217 | -122.169 | -0.043263815 | 69.2604  | -0.163426336 | -136.177 | -1.740624242 |
| 26.7739   | -0.709752174 | 32.1895  | -0.042798555 | -83.5216 | -0.07984084  | 26.5948  | -1.685715152 |
| -118.11   | -0.574104348 | -112.138 | -0.033699364 | 79.1535  | -0.012389962 | -126.249 | -1.432175758 |
| 36.8522   | -0.571130435 | 42.2141  | -0.033127572 | -73.3428 | 0.071422137  | 36.5059  | -1.387836364 |
| 46.5945   | -0.436982609 | -102.116 | -0.023862197 | 89.2669  | 0.136379771  | -116.182 | -1.121848485 |
| -108.056  | -0.436526087 | 52.3108  | -0.023442139 | -63.1092 | 0.220504962  | 46.4055  | -1.094012121 |
| 56.4891   | -0.297641304 | -91.7311 | -0.013926705 | 99.1878  | 0.285223664  | -106.105 | -0.807533333 |
| -98.1056  | -0.296246087 | 62.2867  | -0.013594162 | -53.399  | 0.364733206  | 56.2956  | -0.799872727 |
| -88.0835  | -0.15764087  | -82.0198 | -0.004634185 | 109.222  | 0.436591603  | -96.1329 | -0.495893333 |
| 66.7521   | -0.15409     | 72.2543  | -0.004167069 | -43.3826 | 0.513290076  | 66.5831  | -0.482907273 |
| -78.0709  | -0.017993391 | -72.0987 | 0.004898399  | 119.313  | 0.58569084   | -86.038  | -0.18027697  |
| 76.8022   | -0.01186913  | 82.3502  | 0.005565393  | -33.5902 | 0.661736641  | 76.545   | -0.174591515 |
| -68.0462  | 0.121504783  | -62.2172 | 0.014696301  | 129.177  | 0.733125954  | -76.218  | 0.134043636  |
| 86.8266   | 0.128423913  | 92.1098  | 0.01511185   | -23.4438 | 0.810561069  | 86.7355  | 0.134952121  |
| -57.6937  | 0.26754087   | -52.1036 | 0.024233584  | 139.292  | 0.880858779  | 96.5584  | 0.448265455  |
| 96.8185   | 0.270275217  | 101.862  | 0.024690116  | -13.4564 | 0.961278626  | -65.7027 | 0.454886061  |
| -47.8871  | 0.401198696  | -42.2265 | 0.034006243  | 149.09   | 1.027366412  | -55.9233 | 0.757278788  |
| 106.743   | 0.40926087   | 112.241  | 0.034672832  | -3.47564 | 1.106591603  | 106.644  | 0.760187879  |
| -38.1161  | 0.539004348  | -32.2092 | 0.043466358  | 158.849  | 1.168603053  | -46.0727 | 1.058036364  |
| 116.701   | 0.549056522  | 122.34   | 0.044402601  | 6.47217  | 1.252255725  | 116.445  | 1.073927273  |
| -28.0056  | 0.678456522  | -22.2638 | 0.053026994  | 169.281  | 1.317267176  | -36.3264 | 1.362284848  |
| 126.842   | 0.687630435  | 132.195  | 0.053978382  | 16.4964  | 1.388954198  | 126.55   | 1.391242424  |
| -18.0037  | 0.815013043  | -12.1789 | 0.062562428  | 179.337  | 1.457366412  | -26.115  | 1.661848485  |
| 136.889   | 0.82796087   | 142.26   | 0.063351445  | 26.435   | 1.521282443  | 136.545  | 1.699781818  |
| -8.01981  | 0.954282609  | -2.11461 | 0.071637572  | 189.187  | 1.595958015  | -16.0465 | 1.963569697  |
| 146.824   | 0.964473913  | 152.34   | 0.072717919  | 36.9374  | 1.651877863  | 146.61   | 2.011175758  |
| 1.88721   | 1.087586957  | 7.84673  | 0.080820231  | 199.236  | 1.733725191  | -6.08904 | 2.258733333  |
| 156.228   | 1.091947826  | 162.261  | 0.081900578  | 46.6648  | 1.770958015  | 156.163  | 2.306745455  |
| 11.9537   | 1.219443478  | 17.9935  | 0.089617919  | 209.219  | 1.869889313  | 3.73489  | 2.550024242  |
| 166.786   | 1.235613043  | 172.185  | 0.091193064  | 56.5634  | 1.889167939  | 166.552  | 2.623412121  |
| 21.9428   | 1.344117391  | 28.2106  | 0.098499422  | 219.263  | 1.999229008  | 13.89    | 2.830242424  |
| 176.719   | 1.36686087   | 182.363  | 0.100117919  | 66.5959  | 2.005851145  | 176.542  | 2.924375758  |
| 31.9405   | 1.4647       | 37.8257  | 0.106298266  | 76.5673  | 2.12001145   | 23.7411  | 3.082793939  |
| 186.661   | 1.497943478  | 192.224  | 0.109091908  | 229.307  | 2.126721374  | 186.681  | 3.221351515  |

|         |             |         |             |         |             |         |             |
|---------|-------------|---------|-------------|---------|-------------|---------|-------------|
| 41.7617 | 1.580947826 | 47.7882 | 0.114059538 | 86.4937 | 2.22660687  | 33.789  | 3.322066667 |
| 196.811 | 1.625621739 | 201.852 | 0.11723526  | 239.189 | 2.250278626 | 196.437 | 3.510121212 |
| 52.0974 | 1.694878261 | 57.8623 | 0.121915607 | 96.5858 | 2.33229771  | 44.0905 | 3.565569697 |
| 206.839 | 1.750743478 | 212.136 | 0.125783815 | 249.217 | 2.376255725 | 206.507 | 3.794733333 |
| 62.4374 | 1.807830435 | 67.7536 | 0.12937341  | 106.514 | 2.435916031 | 54.3885 | 3.812624242 |
| 216.814 | 1.872517391 | 222.266 | 0.134304046 | 258.788 | 2.509381679 | 63.8317 | 4.0298      |
| 71.8693 | 1.910113043 | 77.8709 | 0.136587861 | 116.591 | 2.534854962 | 216.604 | 4.069284848 |
| 226.784 | 1.992569565 | 232.272 | 0.142227168 | 269.083 | 2.615       | 73.8467 | 4.251412121 |
| 82.0144 | 2.014682609 | 87.8624 | 0.143466474 | 126.449 | 2.632133588 | 226.446 | 4.340872727 |
| 236.802 | 2.111113043 | 242.222 | 0.150040462 | 279.335 | 2.719167939 | 83.7565 | 4.464557576 |
| 91.9105 | 2.112904348 | 97.8038 | 0.150283237 | 136.553 | 2.736725191 | 236.666 | 4.605206061 |
| 101.932 | 2.208782609 | 107.679 | 0.156758382 | 289.25  | 2.830187023 | 93.8917 | 4.670763636 |
| 246.664 | 2.22573913  | 252.242 | 0.157501734 | 146.532 | 2.831450382 | 246.431 | 4.858363636 |
| 111.85  | 2.30343913  | 117.825 | 0.163261272 | 156.708 | 2.912870229 | 103.847 | 4.869818182 |
| 256.826 | 2.336265217 | 262.267 | 0.165501156 | 299.248 | 2.938938931 | 113.854 | 5.068654545 |
| 122.009 | 2.395882609 | 128.155 | 0.169548555 | 166.588 | 2.994812977 | 256.636 | 5.106163636 |
| 266.571 | 2.44596087  | 272.263 | 0.172706936 | 309.249 | 3.042316794 | 123.927 | 5.257866667 |
| 131.772 | 2.48476087  | 137.911 | 0.175376301 | 176.548 | 3.081022901 | 266.499 | 5.338054545 |
| 276.243 | 2.549052174 | 282.25  | 0.179776301 | 319.218 | 3.142667939 | 133.783 | 5.4396      |
| 141.933 | 2.5731      | 147.937 | 0.181009827 | 186.598 | 3.161675573 | 276.159 | 5.57029697  |
| 286.855 | 2.657313043 | 292.2   | 0.186451445 | 329.207 | 3.241103053 | 143.97  | 5.62109697  |
| 152.004 | 2.658717391 | 157.872 | 0.186563006 | 196.606 | 3.24110687  | 286.658 | 5.792806061 |
| 162.289 | 2.744704348 | 167.868 | 0.191869942 | 206.541 | 3.314801527 | 154.303 | 5.801715152 |
| 296.74  | 2.757034783 | 302.288 | 0.193083237 | 339.284 | 3.331519084 | 163.946 | 5.966260606 |
| 172.131 | 2.823769565 | 177.857 | 0.197345665 | 216.524 | 3.390832061 | 296.53  | 6.010878788 |
| 306.867 | 2.853747826 | 317.865 | 0.200806936 | 349.238 | 3.424049618 | 173.925 | 6.129939394 |
| 182.015 | 2.900943478 | 187.691 | 0.20229422  | 226.528 | 3.469526718 | 306.689 | 6.220363636 |
| 316.914 | 2.949778261 | 197.904 | 0.207418497 | 359.136 | 3.513526718 | 183.818 | 6.28769697  |
| 191.926 | 2.9798      | 207.853 | 0.212282659 | 236.482 | 3.538530534 | 316.656 | 6.420969697 |
| 326.701 | 3.044347826 | 217.843 | 0.216843931 | 246.496 | 3.608767176 | 193.889 | 6.442363636 |
| 201.982 | 3.055882609 | 227.775 | 0.221423121 | 373.246 | 3.615484733 | 203.93  | 6.596606061 |
| 211.907 | 3.128421739 | 364.414 | 0.22404104  | 257.113 | 3.679545802 | 326.706 | 6.619393939 |
| 336.801 | 3.129747826 | 237.833 | 0.225938728 | 266.612 | 3.741702229 | 213.801 | 6.737090909 |
| 221.946 | 3.197356522 | 248.439 | 0.230264162 | 276.497 | 3.806671756 | 336.535 | 6.804242424 |
| 346.744 | 3.212586957 | 257.857 | 0.234112717 | 286.545 | 3.869465649 | 223.84  | 6.87630303  |
| 231.929 | 3.267282609 | 267.847 | 0.238177457 | 416.914 | 3.907557252 | 346.504 | 6.985151515 |
| 356.706 | 3.292065217 | 277.819 | 0.242057803 | 296.624 | 3.93129771  | 233.872 | 7.01        |
| 241.972 | 3.332917391 | 287.872 | 0.245821965 | 306.511 | 3.992862595 | 243.768 | 7.145151515 |
| 366.675 | 3.372173913 | 297.814 | 0.249550867 | 316.571 | 4.048816794 | 356.513 | 7.154242424 |
| 251.914 | 3.399252174 | 415.905 | 0.250001734 | 326.547 | 4.102748092 | 253.82  | 7.27969697  |
| 261.932 | 3.460813043 | 307.842 | 0.253083237 | 336.54  | 4.156984733 | 366.598 | 7.322666667 |
| 385.955 | 3.481278261 | 317.912 | 0.256806358 | 346.547 | 4.217824427 | 263.815 | 7.404121212 |
| 271.978 | 3.524386957 | 327.767 | 0.259937572 | 468.983 | 4.26648855  | 274.328 | 7.533393939 |
| 282.333 | 3.590130435 | 337.846 | 0.26333526  | 356.506 | 4.270839695 | 387.059 | 7.562969697 |
| 291.831 | 3.652895652 | 348.089 | 0.266591329 | 366.589 | 4.325305344 | 283.688 | 7.652666667 |
| 303.644 | 3.738604348 | 357.99  | 0.269813873 | 376.773 | 4.376526718 | 294.71  | 7.821575758 |
| 435.348 | 3.79883913  | 465.883 | 0.270800578 | 386.437 | 4.432671756 | 438.145 | 8.223939394 |
| 348.694 | 3.989534783 | 367.793 | 0.272795954 | 394.801 | 4.478320611 | 338.691 | 8.313939394 |
| 486.533 | 4.110530435 | 376.177 | 0.27563526  | 519.036 | 4.557519084 | 388.704 | 8.771333333 |
| 398.644 | 4.221347826 | 408.597 | 0.286133526 | 427.477 | 4.65110687  | 488.503 | 8.821515152 |
| 536.731 | 4.370043478 | 516.036 | 0.288177457 | 569.173 | 4.810572519 | 438.526 | 9.173393939 |
| 448.617 | 4.422826087 | 458.476 | 0.298573988 | 477.458 | 4.85480916  | 538.751 | 9.312848485 |
| 586.706 | 4.591695652 | 566.1   | 0.302989017 | 619.352 | 5.025534351 | 488.618 | 9.531818182 |
| 498.625 | 4.600217391 | 508.455 | 0.309781503 | 527.549 | 5.032137405 | 588.588 | 9.71430303  |
| 548.769 | 4.76426087  | 616.086 | 0.315312717 | 577.478 | 5.18610687  | 538.764 | 9.84230303  |
| 636.604 | 4.788043478 | 558.51  | 0.319550867 | 669.18  | 5.204770992 | 638.852 | 10.05121212 |
| 598.54  | 4.910652174 | 665.905 | 0.325881503 | 627.327 | 5.315419847 | 588.675 | 10.11824242 |
| 686.643 | 4.950391304 | 608.5   | 0.328038728 | 719.232 | 5.363282443 | 688.616 | 10.32593939 |
| 648.648 | 5.038608696 | 716.127 | 0.334887283 | 677.606 | 5.446984733 | 638.847 | 10.36684848 |
| 736.761 | 5.091913043 | 658.525 | 0.33589422  | 769.111 | 5.500801527 | 738.697 | 10.57830303 |
| 700.091 | 5.156086957 | 708.466 | 0.342779769 | 727.38  | 5.557633588 | 690.078 | 10.59618182 |
| 786.643 | 5.212173913 | 765.956 | 0.342789595 | 819.259 | 5.639236641 | 788.632 | 10.79418182 |
| 750.058 | 5.261130435 | 760.535 | 0.349522543 | 779.403 | 5.665763359 | 739.568 | 10.80472727 |
| 836.615 | 5.31926087  | 816.111 | 0.349717919 | 869.109 | 5.75740458  | 788.561 | 10.98418182 |
| 798.69  | 5.355130435 | 809.008 | 0.355013295 | 827.927 | 5.777175573 | 838.854 | 10.99236364 |
| 886.647 | 5.412347826 | 863.561 | 0.35559711  | 917.816 | 5.869045802 | 838.661 | 11.15115152 |
| 848.589 | 5.437565217 | 858.496 | 0.359949133 | 877.444 | 5.870458015 | 888.723 | 11.16836364 |
| 936.185 | 5.498391304 | 916.223 | 0.361172254 | 968.259 | 5.938091603 | 888.667 | 11.30157576 |
| 898.676 | 5.509782609 | 908.552 | 0.364606358 | 927.381 | 5.944389313 | 937.781 | 11.31206061 |
| 984.671 | 5.57        | 966.076 | 0.365895376 | 1019.04 | 6.00980916  | 938.657 | 11.43387879 |
| 948.585 | 5.584217391 | 958.466 | 0.368943353 | 977.496 | 6.020229008 | 986.64  | 11.45181818 |
| 1036.55 | 5.642869565 | 1016.14 | 0.370412139 | 1069.25 | 6.055       | 988.655 | 11.5649697  |
| 998.527 | 5.647826087 | 1008.64 | 0.372865318 | 1027.44 | 6.081679389 | 1038.72 | 11.58193939 |
| 1045.76 | 5.704217391 | 1066.11 | 0.374375145 | 1077.42 | 6.124465649 | 1035.83 | 11.67539394 |

|         |              |         |             |         |             |         |             |
|---------|--------------|---------|-------------|---------|-------------|---------|-------------|
| 1086.63 | 5.705608696  | 1058.52 | 0.376367052 | 1119.2  | 6.130343511 | 1088.74 | 11.69084848 |
| 1136.69 | 5.767434783  | 1115.99 | 0.378127746 | 1169.34 | 6.189465649 | 1138.72 | 11.79618182 |
| 1124.51 | 5.798130435  | 1105.58 | 0.37972659  | 1126.41 | 6.199312977 | 1111.79 | 11.84351515 |
| 1186.59 | 5.817826087  | 1166.04 | 0.381303468 | 1211.97 | 6.267061069 | 1188.59 | 11.89345455 |
| 1236.7  | 5.859086957  | 1216.15 | 0.384285549 | 1219.16 | 6.273931298 | 1238.89 | 11.97727273 |
| 1224.26 | 5.89126087   | 1190.62 | 0.385033526 | 1269.15 | 6.322137405 | 1211.62 | 12.02084848 |
| 1286.49 | 5.902434783  | 1266.12 | 0.387075145 | 1311.66 | 6.358740458 | 1288.68 | 12.0509697  |
| 1336.7  | 5.947173913  | 1316.04 | 0.38969422  | 1319.27 | 6.365114504 | 1338.79 | 12.13048485 |
| 1324.43 | 5.967347826  | 1290.65 | 0.390193642 | 1369.21 | 6.406984733 | 1311.58 | 12.17672727 |
| 1386.75 | 5.987565217  | 1366.04 | 0.392091329 | 1411.77 | 6.438625954 | 1388.73 | 12.20575758 |
| 1436.63 | 6.02173913   | 1390.28 | 0.394465896 | 1419.16 | 6.444198473 | 1438.69 | 12.28557576 |
| 1429.12 | 6.03973913   | 1421.43 | 0.394584393 | 1470.51 | 6.480687023 | 1416.8  | 12.31890909 |
| 1495.37 | 6.057869565  | 1515.8  | 0.39842948  | 1514.01 | 6.50870229  | 1494.07 | 12.34363636 |
| 1525.62 | 6.100826087  | 1491.71 | 0.398558382 | 1558.22 | 6.536259542 | 1512.65 | 12.43375758 |
| 1596.47 | 6.11973913   | 1594.51 | 0.402040462 | 1614.92 | 6.569236641 | 1588.35 | 12.45163636 |
| 1624.36 | 6.1489565217 | 1618.89 | 0.402268208 | 1662.13 | 6.594541985 | 1611.57 | 12.53109091 |
| 1697.67 | 6.169347826  | 1690.34 | 0.40493815  | 1711.79 | 6.620267176 | 1691.19 | 12.56260601 |
| 1724.32 | 6.196782609  | 1719    | 0.405381503 | 1762.16 | 6.644198473 | 1711.85 | 12.62660606 |
| 1797.94 | 6.215391304  | 1790.36 | 0.407782081 | 1812.12 | 6.667366412 | 1791.26 | 12.65266667 |
| 1824.36 | 6.241        | 1818.9  | 0.40809422  | 1862.17 | 6.689732824 | 1811.77 | 12.72587879 |
| 1897.8  | 6.258782609  | 1890.53 | 0.41034104  | 1911.86 | 6.709694656 | 1891.34 | 12.7309697  |
| 1924.98 | 6.275434783  | 1925.04 | 0.410838728 | 1994.67 | 6.742290076 | 1911.94 | 12.79151515 |
| 2012.51 | 6.313304348  | 1990.66 | 0.412922543 | 2012.42 | 6.748091603 | 1999.49 | 12.80278788 |
| 2019.08 | 6.315695652  | 2094.41 | 0.415171098 | 2110.92 | 6.784045802 | 2005.95 | 12.85242424 |
| 2192.49 | 6.370565217  | 2104.73 | 0.415375145 | 2192.49 | 6.81019084  | 2174.74 | 12.96357576 |
| 2203.25 | 6.373782609  | 2277.87 | 0.418565896 | 2295.37 | 6.84148855  | 2182.93 | 12.96806061 |
| 2392.37 | 6.424826087  | 2304.25 | 0.419028324 | 2392.94 | 6.86851145  | 2374.5  | 13.08321212 |
| 2402.79 | 6.427434783  | 2478.34 | 0.421771676 | 2494.81 | 6.894961832 | 2382.66 | 13.088      |
| 2592.35 | 6.469956522  | 2505.34 | 0.422130636 | 2593.46 | 6.918320611 | 2574.94 | 13.19193939 |
| 2602.83 | 6.472217391  | 2677.69 | 0.424488439 | 2695.37 | 6.940229008 | 2583.42 | 13.19654545 |
| 2792.22 | 6.509391304  | 2704.87 | 0.424844509 | 2793.4  | 6.960305344 | 2774.12 | 13.292      |
| 2803.17 | 6.511478261  | 2877.42 | 0.426908671 | 2895.09 | 6.979503817 | 2783.36 | 13.29648485 |
| 2994.14 | 6.544608696  | 2905.14 | 0.427220231 | 2993.06 | 6.997099237 | 2978.83 | 13.3850303  |
| 3003.6  | 6.546217391  | 3082.54 | 0.429147977 | 3100.86 | 7.014770992 | 2983    | 13.38684848 |
| 3198.5  | 6.576826087  | 3096.76 | 0.42929711  | 3187.3  | 7.028015267 | 3177.69 | 13.46690909 |
| 3200.09 | 6.577086957  | 3284.25 | 0.431123121 | 3299.85 | 7.043854962 | 3180.47 | 13.468      |
| 3392.51 | 6.604956522  | 3300.88 | 0.431280347 | 3386.94 | 7.055801527 | 3374.38 | 13.53866667 |
| 3397.67 | 6.605695652  | 3478.5  | 0.432872832 | 3495.11 | 7.070381679 | 3379.27 | 13.54030303 |
| 3592.5  | 6.631434783  | 3504.78 | 0.433091329 | 3593.36 | 7.083358779 | 3574.86 | 13.60466667 |
| 3603.19 | 6.63273913   | 3678.37 | 0.434534104 | 3694.63 | 7.097328244 | 3582.75 | 13.60709091 |
| 3791.93 | 6.65573913   | 3705.07 | 0.434746821 | 3792.75 | 7.110381679 | 3775.03 | 13.66369697 |
| 3803.13 | 6.657086957  | 3878.17 | 0.436032948 | 3895.37 | 7.123358779 | 3783.18 | 13.66593939 |
| 3992.09 | 6.678086957  | 3904.83 | 0.436226012 | 3993.52 | 7.13648855  | 3974.63 | 13.71715152 |
| 4003.23 | 6.679304348  | 4077.98 | 0.437423699 | 4095.05 | 7.149160305 | 3983.19 | 13.71933333 |
| 4192.55 | 6.699086957  | 4104.92 | 0.437597688 | 4193.22 | 7.161145038 | 4174.23 | 13.76636364 |
| 4203.06 | 6.700130435  | 4278.38 | 0.438752023 | 4295.55 | 7.173740458 | 4182.82 | 13.76848485 |
| 4392.39 | 6.719347826  | 4304.6  | 0.438922543 | 4393    | 7.185038168 | 4374.76 | 13.81345455 |
| 4402.59 | 6.720391304  | 4478.16 | 0.43999422  | 4494.91 | 7.196450382 | 4382.89 | 13.81527273 |
| 4591.94 | 6.738521739  | 4504.46 | 0.440156069 | 4592.84 | 7.207175573 | 4574.78 | 13.85709091 |
| 4603.12 | 6.739565217  | 4678.34 | 0.441185549 | 4695.42 | 7.217900763 | 4582.86 | 13.85884848 |
| 4792.43 | 6.756826087  | 4704.28 | 0.441326012 | 4792.75 | 7.227671756 | 4775.31 | 13.89806061 |
| 4803.65 | 6.757782609  | 4878.16 | 0.442313295 | 4895.78 | 7.237709924 | 4782.87 | 13.89957576 |
| 4996.51 | 6.774695652  | 4926.93 | 0.442581503 | 5015.79 | 7.24889313  | 4973.73 | 13.93739394 |
| 5097.65 | 6.783043478  | 5067.64 | 0.44330578  | 5080.07 | 7.254770992 | 5000.58 | 13.94206061 |
| 5439.12 | 6.809695652  | 5375.73 | 0.444802312 | 5418.7  | 7.283129771 | 5385.67 | 14.00890909 |
| 5596.66 | 6.821086957  | 5392.52 | 0.444882081 | 5462.26 | 7.286564885 | 5437.84 | 14.01727273 |
| 5927.26 | 6.843782609  | 5854.58 | 0.446903468 | 5941.17 | 7.319389313 | 5883.29 | 14.08745455 |
| 6080.5  | 6.853869565  | 5923.28 | 0.447186705 | 5946.07 | 7.319694656 | 5917.62 | 14.09266667 |
| 6424.83 | 6.875        | 6384.16 | 0.448924277 | 6426.09 | 7.345496183 | 6377.02 | 14.15793939 |
| 6595.09 | 6.884826087  | 6400.51 | 0.448982659 | 6471.8  | 7.34759542  | 6440.34 | 14.16606061 |
| 6929.67 | 6.903347826  | 6885.76 | 0.450642197 | 6928.86 | 7.368053435 | 6880.8  | 14.22339394 |
| 7107.03 | 6.912782609  | 6905.56 | 0.450706936 | 6972.4  | 7.370038168 | 6949.45 | 14.23206061 |
| 7433.52 | 6.92926087   | 7388.97 | 0.452206936 | 7434.51 | 7.39019084  | 7383.96 | 14.28187879 |
| 7611.58 | 6.93773913   | 7408.8  | 0.452264162 | 7477.03 | 7.391755725 | 7453.93 | 14.28921212 |
| 7936.73 | 6.95273913   | 7893.24 | 0.453656647 | 7936.07 | 7.411450382 | 7889.16 | 14.33163636 |
| 8114.15 | 6.960652174  | 7911.04 | 0.453706936 | 7979.78 | 7.413435115 | 7955.64 | 14.33769697 |
| 8440.84 | 6.974608696  | 8396.51 | 0.455020809 | 8440.49 | 7.43370229  | 8390.61 | 14.37569697 |
| 8616.98 | 6.981913043  | 8415.47 | 0.455071098 | 8483.84 | 7.435648855 | 8459.23 | 14.38151515 |
| 8944.05 | 6.995086957  | 8900.09 | 0.456280925 | 8943.85 | 7.455419847 | 8895.42 | 14.41636364 |
| 9120.18 | 7.001869565  | 8919.29 | 0.456328324 | 8986.65 | 7.457290076 | 8963.84 | 14.42157576 |
| 9447.96 | 7.014173913  | 9401.49 | 0.457468208 | 9446.65 | 7.476946565 | 9400.08 | 14.45345455 |
| 9623.22 | 7.020652174  | 9422.93 | 0.457517919 | 9490.13 | 7.478778626 | 9464.89 | 14.458      |
| 9950.36 | 7.032434783  | 9905.1  | 0.458602312 | 9952.28 | 7.497900763 | 9902.5  | 14.48763636 |
| 10126.6 | 7.038652174  | 9927.43 | 0.458651445 | 9991.94 | 7.499541985 | 9969.48 | 14.49187879 |

|         |             |         |             |         |             |         |             |
|---------|-------------|---------|-------------|---------|-------------|---------|-------------|
| 10455.2 | 7.050173913 | 10407.5 | 0.459698844 | 10455.7 | 7.518320611 | 10407.6 | 14.51993939 |
| 10629.9 | 7.056217391 | 10429.7 | 0.459746243 | 10497.2 | 7.52        | 10471.5 | 14.524      |
| 10964.6 | 7.067695652 | 10911.8 | 0.460769364 | 10969.9 | 7.53870229  | 10910.9 | 14.55133333 |
| 11133.3 | 7.073391304 | 10949.8 | 0.460849711 | 10998.3 | 7.53980916  | 10975.6 | 14.55539394 |
| 11482.8 | 7.085       | 11403.6 | 0.461788439 | 11478.3 | 7.558053435 | 11439.9 | 14.58406061 |
| 11616.3 | 7.089391304 | 11453.3 | 0.461887283 | 11492.4 | 7.558549618 | 11468   | 14.58587879 |
| 11967.9 | 7.100695652 | 11902.5 | 0.462789595 | 11967.3 | 7.575305344 | 11918.3 | 14.61381818 |
| 12133.6 | 7.105956522 | 11942.7 | 0.462867052 | 11989   | 7.576068702 | 11966.6 | 14.61678788 |
| 12471.4 | 7.116347826 | 12421.2 | 0.463791329 | 12470.7 | 7.592061069 | 12423.3 | 14.64478788 |
| 12642.4 | 7.121478261 | 12446.7 | 0.463838728 | 12508   | 7.593244275 | 12483.1 | 14.64836364 |
| 12975.7 | 7.131130435 | 12921.7 | 0.464716185 | 12977.1 | 7.60851145  | 12927.2 | 14.67430303 |
| 13142.9 | 7.135826087 | 12950.7 | 0.46476763  | 13009.3 | 7.609541985 | 12986.1 | 14.67757576 |
| 13481.2 | 7.145043478 | 13425.3 | 0.4656      | 13480.3 | 7.624923664 | 13432   | 14.70169697 |
| 13646   | 7.149304348 | 13456.3 | 0.465653179 | 13512.7 | 7.625992366 | 13488.9 | 14.70466667 |
| 13985.7 | 7.157869565 | 13926.7 | 0.466427746 | 13985.7 | 7.641450382 | 13936.3 | 14.7269697  |
| 14147.5 | 7.161695652 | 13960.5 | 0.466482081 | 14013.3 | 7.642328244 | 13989.5 | 14.72951515 |
| 14491.2 | 7.169608696 | 14428   | 0.467199422 | 14493   | 7.657633588 | 14444.9 | 14.7510303  |
| 14648.1 | 7.173043478 | 14467.6 | 0.467254913 | 14515.3 | 7.658358779 | 14490.6 | 14.75315152 |
| 15000.2 | 7.180434783 | 14928.1 | 0.467897688 | 14998.5 | 7.673091603 | 14949.3 | 14.77418182 |
| 15147.8 | 7.18326087  | 14973   | 0.467956069 | 15015.2 | 7.673587786 | 14992.2 | 14.77612121 |
| 15507.5 | 7.189695652 | 15427.9 | 0.468505202 | 15506.9 | 7.688816794 | 15458.2 | 14.79557576 |
| 15648.4 | 7.192391304 | 15482.8 | 0.46857052  | 15513.7 | 7.689045802 | 15491.9 | 14.7970303  |
| 16016.6 | 7.19926087  | 15926   | 0.469132948 | 16014.7 | 7.705305344 | 15967.2 | 14.81575758 |
| 16146   | 7.201521739 | 15992.2 | 0.469209249 | 16017   | 7.705381679 | 15990.3 | 14.81660606 |
| 16547.6 | 7.20773913  | 19995.2 | 0.469259538 | 16510.9 | 7.717709924 | 16486.1 | 14.83357576 |
| 16641.5 | 7.209043478 | 19678.3 | 0.469572832 | 16528.7 | 7.718091603 | 16489.4 | 14.83369697 |
| 17047.4 | 7.214       | 19658.1 | 0.469590751 | 19995.7 | 7.719732824 | 16967.9 | 14.84781818 |
| 17134.7 | 7.214913043 | 19638.2 | 0.469608092 | 19678.7 | 7.725763359 | 17006.5 | 14.84890909 |
| 17556.4 | 7.21873913  | 19618.1 | 0.469626012 | 19659   | 7.726068702 | 17467.7 | 14.86048485 |
| 17613.3 | 7.219173913 | 16423.4 | 0.469638728 | 19638.8 | 7.726412214 | 17505.7 | 14.86133333 |
| 19995.3 | 7.220086957 | 19533.4 | 0.469696532 | 16986.8 | 7.726564885 | 17971   | 14.8709697  |
| 19678.1 | 7.222       | 16524.1 | 0.469723121 | 19618.8 | 7.726717557 | 18023.6 | 14.87193939 |
| 18073.8 | 7.2222      | 19268.4 | 0.469892486 | 19545.4 | 7.727862595 | 18462.5 | 14.87909091 |
| 19658.4 | 7.222086957 | 19241.7 | 0.469910405 | 17073.5 | 7.727862595 | 18547.2 | 14.88030303 |
| 19638.3 | 7.222173913 | 16901.2 | 0.469985549 | 19375.4 | 7.730267176 | 18948.1 | 14.8850303  |
| 19618.2 | 7.22226087  | 19106.5 | 0.469993064 | 19333.6 | 7.730801527 | 19080.4 | 14.88630303 |
| 18125.4 | 7.22226087  | 17020.3 | 0.470052023 | 17496.6 | 7.733015267 | 19336.7 | 14.88824242 |
| 19544.5 | 7.222608696 | 18888   | 0.470106358 | 19130.4 | 7.733053435 | 19377.8 | 14.88848485 |
| 19394.2 | 7.223130435 | 17410.3 | 0.470214451 | 17556   | 7.733549618 | 19522.3 | 14.88927273 |
| 19373.7 | 7.223173913 | 18572.1 | 0.470225434 | 18970.3 | 7.734465649 | 19618.1 | 14.88969697 |
| 18597.8 | 7.223695652 | 17529.8 | 0.470247977 | 17995.2 | 7.736374046 | 19638.2 | 14.88975758 |
| 19131.9 | 7.22373913  | 18400   | 0.470268208 | 18598.9 | 7.736526718 | 19658.3 | 14.88981818 |
| 18616.3 | 7.22373913  | 17908.3 | 0.470305202 | 18073.2 | 7.736603053 | 19678.1 | 14.88987879 |
| 19098.1 | 7.223782609 | 18047   | 0.470307514 | 18486   | 7.736832061 | 19995.2 | 14.89042424 |

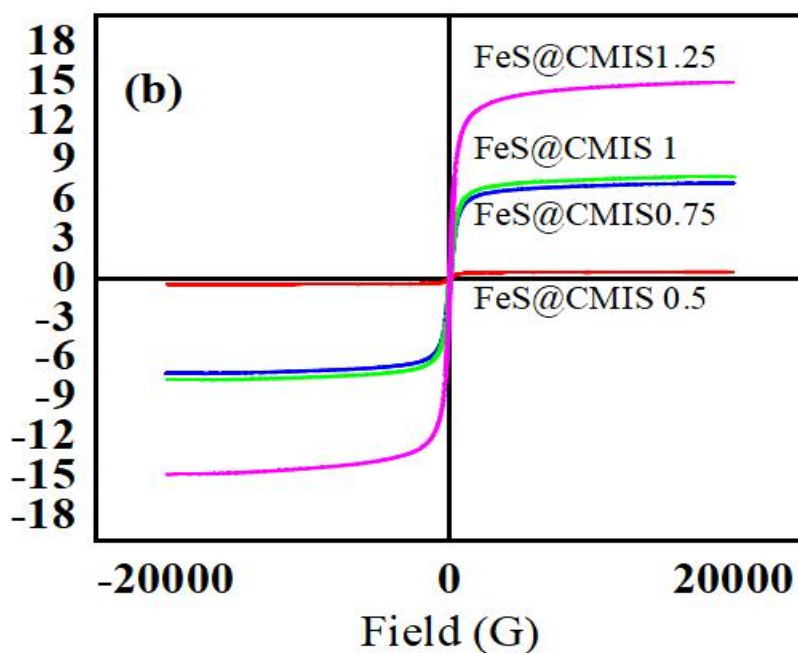

| FeSO <sub>4</sub> dosage (g) | adsorption capacity(mg/g) | Er±         |
|------------------------------|---------------------------|-------------|
| 0                            | 47.82                     | 0.6475659   |
| 0.5                          | 57.65                     | 0.844624968 |
| 1                            | 61.92                     | 0.74065068  |
| 1.5                          | 65.82                     | 0.32        |
| 2                            | 66.12                     | 0.35843     |

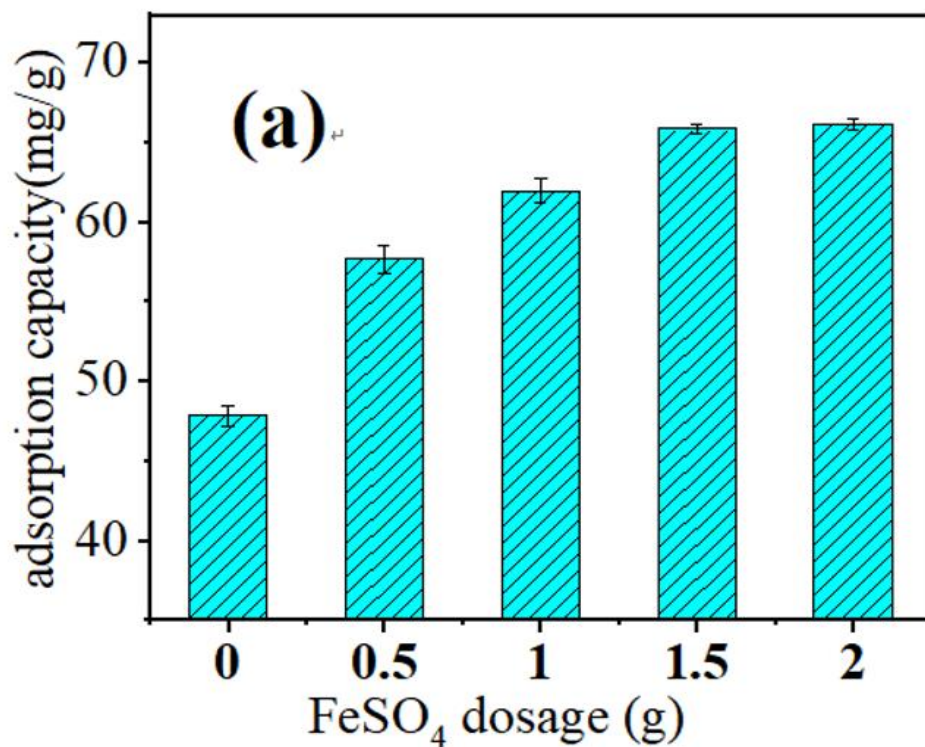



| Adsorbents  | Adsorption capacity (mg/g) | (Er ±)  |
|-------------|----------------------------|---------|
| IBWS        | 1.23185                    | 0.34462 |
| MIBWS       | 5.84509                    | 0.34065 |
| Fe/S        | 10.48                      | 0.5235  |
| Fe/S@MIBWS  | 14.81                      | 0.4675  |
| CMIBWS      | 47.42                      | 0.32    |
| Fe/S@CMIBWS | 65.72                      | 2.12542 |
| PANI@MIBWS  | 108.41482                  | 3.72124 |

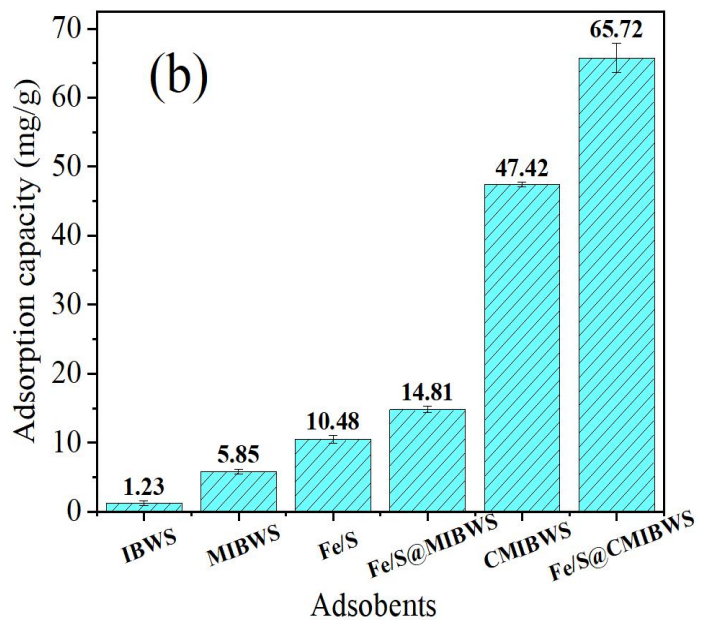

| 2 $\theta$ (°) | Intensity (a.u.) |       |
|----------------|------------------|-------|
|                | Fe/S@CMIBWS      | MIBWS |
| 5              | 1432             | 3473  |
| 5.02           | 1361             | 3485  |
| 5.04           | 1446             | 3412  |
| 5.06           | 1423             | 3436  |
| 5.08           | 1430             | 3452  |
| 5.1            | 1462             | 3445  |
| 5.12           | 1421             | 3447  |
| 5.14           | 1389             | 3451  |
| 5.16           | 1417             | 3482  |
| 5.18           | 1375             | 3439  |
| 5.2            | 1397             | 3518  |
| 5.22           | 1393             | 3478  |
| 5.24           | 1351             | 3448  |
| 5.26           | 1379             | 3427  |
| 5.28           | 1349             | 3458  |
| 5.3            | 1353             | 3445  |
| 5.32           | 1430             | 3472  |
| 5.34           | 1341             | 3447  |
| 5.36           | 1372             | 3445  |
| 5.38           | 1423             | 3468  |
| 5.4            | 1361             | 3402  |
| 5.42           | 1446             | 3463  |
| 5.44           | 1382             | 3491  |
| 5.46           | 1353             | 3366  |
| 5.48           | 1414             | 3419  |
| 5.5            | 1437             | 3431  |
| 5.52           | 1424             | 3401  |
| 5.54           | 1327             | 3422  |
| 5.56           | 1413             | 3408  |
| 5.58           | 1371             | 3479  |
| 5.6            | 1398             | 3405  |
| 5.62           | 1370             | 3381  |
| 5.64           | 1320             | 3448  |
| 5.66           | 1327             | 3448  |
| 5.68           | 1393             | 3418  |
| 5.7            | 1353             | 3410  |
| 5.72           | 1348             | 3391  |
| 5.74           | 1346             | 3426  |
| 5.76           | 1343             | 3414  |
| 5.78           | 1409             | 3408  |
| 5.8            | 1420             | 3443  |
| 5.82           | 1443             | 3393  |
| 5.84           | 1385             | 3352  |
| 5.86           | 1376             | 3444  |
| 5.88           | 1330             | 3391  |
| 5.9            | 1383             | 3445  |
| 5.92           | 1351             | 3461  |
| 5.94           | 1325             | 3419  |
| 5.96           | 1326             | 3454  |
| 5.98           | 1415             | 3394  |
| 6              | 1374             | 3378  |
| 6.02           | 1392             | 3363  |
| 6.04           | 1340             | 3324  |
| 6.06           | 1388             | 3323  |
| 6.08           | 1371             | 3373  |
| 6.1            | 1404             | 3377  |
| 6.12           | 1366             | 3414  |
| 6.14           | 1279             | 3423  |
| 6.16           | 1361             | 3365  |
| 6.18           | 1314             | 3406  |
| 6.2            | 1348             | 3365  |
| 6.22           | 1376             | 3418  |

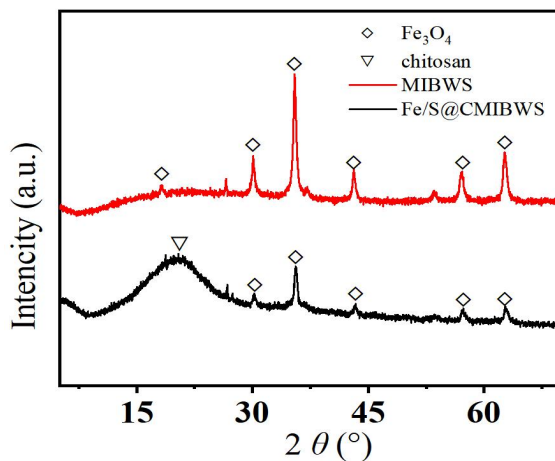

| 2 $\theta$ (°) | Intencity (a.u.) |       |
|----------------|------------------|-------|
|                | Fe/S@CMIBWS      | MIBWS |
| 6.24           | 1280             | 3366  |
| 6.26           | 1269             | 3366  |
| 6.28           | 1326             | 3417  |
| 6.3            | 1362             | 3383  |
| 6.32           | 1311             | 3390  |
| 6.34           | 1339             | 3397  |
| 6.36           | 1301             | 3350  |
| 6.38           | 1319             | 3384  |
| 6.4            | 1339             | 3372  |
| 6.42           | 1297             | 3365  |
| 6.44           | 1331             | 3427  |
| 6.46           | 1280             | 3318  |
| 6.48           | 1241             | 3392  |
| 6.5            | 1362             | 3299  |
| 6.52           | 1345             | 3362  |
| 6.54           | 1320             | 3337  |
| 6.56           | 1319             | 3374  |
| 6.58           | 1334             | 3360  |
| 6.6            | 1311             | 3343  |
| 6.62           | 1327             | 3346  |
| 6.64           | 1244             | 3386  |
| 6.66           | 1318             | 3393  |
| 6.68           | 1284             | 3361  |
| 6.7            | 1283             | 3344  |
| 6.72           | 1278             | 3359  |
| 6.74           | 1313             | 3344  |
| 6.76           | 1243             | 3360  |
| 6.78           | 1231             | 3328  |
| 6.8            | 1298             | 3397  |
| 6.82           | 1311             | 3340  |
| 6.84           | 1210             | 3327  |
| 6.86           | 1284             | 3300  |
| 6.88           | 1357             | 3378  |
| 6.9            | 1208             | 3329  |
| 6.92           | 1258             | 3308  |
| 6.94           | 1262             | 3317  |
| 6.96           | 1264             | 3339  |
| 6.98           | 1212             | 3336  |
| 7              | 1301             | 3322  |
| 7.02           | 1223             | 3348  |
| 7.04           | 1238             | 3311  |
| 7.06           | 1244             | 3296  |
| 7.08           | 1247             | 3324  |
| 7.1            | 1204             | 3318  |
| 7.12           | 1227             | 3316  |
| 7.14           | 1213             | 3290  |
| 7.16           | 1245             | 3309  |
| 7.18           | 1219             | 3268  |
| 7.2            | 1201             | 3364  |
| 7.22           | 1162             | 3314  |
| 7.24           | 1144             | 3369  |
| 7.26           | 1199             | 3288  |
| 7.28           | 1159             | 3335  |
| 7.3            | 1133             | 3369  |
| 7.32           | 1239             | 3321  |
| 7.34           | 1153             | 3300  |
| 7.36           | 1183             | 3285  |
| 7.38           | 1161             | 3320  |
| 7.4            | 1150             | 3272  |
| 7.42           | 1242             | 3333  |
| 7.44           | 1160             | 3291  |
| 7.46           | 1129             | 3373  |

| 2 $\theta$ (°) | Intencity (a.u.) |       |
|----------------|------------------|-------|
|                | Fe/S@CMIBWS      | MIBWS |
| 7.48           | 1177             | 3332  |
| 7.5            | 1136             | 3306  |
| 7.52           | 1153             | 3316  |
| 7.54           | 1216             | 3324  |
| 7.56           | 1212             | 3365  |
| 7.58           | 1163             | 3307  |
| 7.6            | 1140             | 3376  |
| 7.62           | 1155             | 3309  |
| 7.64           | 1197             | 3290  |
| 7.66           | 1138             | 3324  |
| 7.68           | 1169             | 3307  |
| 7.7            | 1117             | 3301  |
| 7.72           | 1114             | 3340  |
| 7.74           | 1137             | 3363  |
| 7.76           | 1133             | 3289  |
| 7.78           | 1151             | 3363  |
| 7.8            | 1150             | 3338  |
| 7.82           | 1100             | 3362  |
| 7.84           | 1102             | 3299  |
| 7.86           | 1117             | 3314  |
| 7.88           | 1103             | 3306  |
| 7.9            | 1125             | 3332  |
| 7.92           | 1133             | 3377  |
| 7.94           | 1108             | 3346  |
| 7.96           | 1069             | 3318  |
| 7.98           | 1117             | 3332  |
| 8              | 1100             | 3360  |
| 8.02           | 1142             | 3352  |
| 8.04           | 1111             | 3339  |
| 8.06           | 1180             | 3315  |
| 8.08           | 1112             | 3338  |
| 8.1            | 1192             | 3335  |
| 8.12           | 1166             | 3328  |
| 8.14           | 1067             | 3391  |
| 8.16           | 1065             | 3292  |
| 8.18           | 1052             | 3336  |
| 8.2            | 1068             | 3335  |
| 8.22           | 1121             | 3361  |
| 8.24           | 1056             | 3356  |
| 8.26           | 1115             | 3284  |
| 8.28           | 1138             | 3311  |
| 8.3            | 1085             | 3280  |
| 8.32           | 1059             | 3347  |
| 8.34           | 1088             | 3363  |
| 8.36           | 1058             | 3378  |
| 8.38           | 1034             | 3332  |
| 8.4            | 1000             | 3415  |
| 8.42           | 1052             | 3359  |
| 8.44           | 1026             | 3343  |
| 8.46           | 1114             | 3352  |
| 8.48           | 1059             | 3339  |
| 8.5            | 1081             | 3362  |
| 8.52           | 1030             | 3384  |
| 8.54           | 1086             | 3333  |
| 8.56           | 1081             | 3329  |
| 8.58           | 1086             | 3333  |
| 8.6            | 1075             | 3357  |
| 8.62           | 1050             | 3362  |
| 8.64           | 1076             | 3375  |
| 8.66           | 1079             | 3388  |
| 8.68           | 1067             | 3380  |
| 8.7            | 1155             | 3398  |

| 2 $\theta$ (°) | Intencity (a.u.) |       |
|----------------|------------------|-------|
|                | Fe/S@CMIBWS      | MIBWS |
| 8.72           | 1067             | 3360  |
| 8.74           | 1091             | 3395  |
| 8.76           | 1033             | 3346  |
| 8.78           | 1050             | 3371  |
| 8.8            | 1080             | 3404  |
| 8.82           | 1079             | 3410  |
| 8.84           | 1084             | 3303  |
| 8.86           | 1036             | 3415  |
| 8.88           | 1039             | 3402  |
| 8.9            | 1036             | 3431  |
| 8.92           | 1058             | 3316  |
| 8.94           | 1061             | 3399  |
| 8.96           | 1070             | 3385  |
| 8.98           | 1070             | 3367  |
| 9              | 1057             | 3406  |
| 9.02           | 1079             | 3360  |
| 9.04           | 1064             | 3368  |
| 9.06           | 1092             | 3420  |
| 9.08           | 1091             | 3389  |
| 9.1            | 1082             | 3338  |
| 9.12           | 1122             | 3363  |
| 9.14           | 1078             | 3384  |
| 9.16           | 1064             | 3355  |
| 9.18           | 1113             | 3386  |
| 9.2            | 1059             | 3443  |
| 9.22           | 1109             | 3354  |
| 9.24           | 1048             | 3292  |
| 9.26           | 1046             | 3398  |
| 9.28           | 1110             | 3377  |
| 9.3            | 1086             | 3402  |
| 9.32           | 1083             | 3422  |
| 9.34           | 1085             | 3423  |
| 9.36           | 1055             | 3409  |
| 9.38           | 1024             | 3403  |
| 9.4            | 1064             | 3401  |
| 9.42           | 1064             | 3399  |
| 9.44           | 1029             | 3390  |
| 9.46           | 1082             | 3335  |
| 9.48           | 1119             | 3377  |
| 9.5            | 1078             | 3404  |
| 9.52           | 1105             | 3385  |
| 9.54           | 1099             | 3366  |
| 9.56           | 1036             | 3424  |
| 9.58           | 1039             | 3399  |
| 9.6            | 1029             | 3377  |
| 9.62           | 1110             | 3375  |
| 9.64           | 1057             | 3386  |
| 9.66           | 1085             | 3363  |
| 9.68           | 1147             | 3362  |
| 9.7            | 1074             | 3406  |
| 9.72           | 1099             | 3408  |
| 9.74           | 1072             | 3378  |
| 9.76           | 1104             | 3381  |
| 9.78           | 1113             | 3356  |
| 9.8            | 1123             | 3445  |
| 9.82           | 1059             | 3375  |
| 9.84           | 1120             | 3405  |
| 9.86           | 1063             | 3405  |
| 9.88           | 1113             | 3384  |
| 9.9            | 1089             | 3431  |
| 9.92           | 1107             | 3407  |
| 9.94           | 1118             | 3363  |

| 2 $\theta$ (°) | Intencity (a.u.) |       |
|----------------|------------------|-------|
|                | Fe/S@CMIBWS      | MIBWS |
| 9.96           | 1051             | 3420  |
| 9.98           | 1074             | 3343  |
| 10             | 1085             | 3379  |
| 10.02          | 1096             | 3421  |
| 10.04          | 1115             | 3402  |
| 10.06          | 1101             | 3416  |
| 10.08          | 1161             | 3388  |
| 10.1           | 1116             | 3388  |
| 10.12          | 1157             | 3457  |
| 10.14          | 1092             | 3438  |
| 10.16          | 1110             | 3414  |
| 10.18          | 1110             | 3387  |
| 10.2           | 1123             | 3423  |
| 10.22          | 1066             | 3466  |
| 10.24          | 1151             | 3454  |
| 10.26          | 1113             | 3401  |
| 10.28          | 1147             | 3377  |
| 10.3           | 1124             | 3472  |
| 10.32          | 1058             | 3384  |
| 10.34          | 1114             | 3409  |
| 10.36          | 1092             | 3410  |
| 10.38          | 1129             | 3414  |
| 10.4           | 1186             | 3462  |
| 10.42          | 1145             | 3456  |
| 10.44          | 1182             | 3417  |
| 10.46          | 1137             | 3418  |
| 10.48          | 1115             | 3452  |
| 10.5           | 1117             | 3411  |
| 10.52          | 1136             | 3440  |
| 10.54          | 1119             | 3423  |
| 10.56          | 1159             | 3473  |
| 10.58          | 1141             | 3489  |
| 10.6           | 1134             | 3493  |
| 10.62          | 1118             | 3463  |
| 10.64          | 1184             | 3460  |
| 10.66          | 1152             | 3445  |
| 10.68          | 1100             | 3433  |
| 10.7           | 1127             | 3400  |
| 10.72          | 1169             | 3452  |
| 10.74          | 1133             | 3506  |
| 10.76          | 1199             | 3512  |
| 10.78          | 1184             | 3424  |
| 10.8           | 1141             | 3494  |
| 10.82          | 1077             | 3478  |
| 10.84          | 1134             | 3477  |
| 10.86          | 1214             | 3474  |
| 10.88          | 1164             | 3491  |
| 10.9           | 1223             | 3449  |
| 10.92          | 1092             | 3477  |
| 10.94          | 1179             | 3461  |
| 10.96          | 1204             | 3448  |
| 10.98          | 1189             | 3478  |
| 11             | 1145             | 3464  |
| 11.02          | 1210             | 3404  |
| 11.04          | 1175             | 3462  |
| 11.06          | 1195             | 3479  |
| 11.08          | 1160             | 3469  |
| 11.1           | 1161             | 3430  |
| 11.12          | 1170             | 3502  |
| 11.14          | 1156             | 3487  |
| 11.16          | 1118             | 3516  |
| 11.18          | 1194             | 3419  |

| 2 $\theta$ (°) | Intencity (a.u.) |       |
|----------------|------------------|-------|
|                | Fe/S@CMIBWS      | MIBWS |
| 11.2           | 1177             | 3439  |
| 11.22          | 1135             | 3485  |
| 11.24          | 1184             | 3444  |
| 11.26          | 1181             | 3404  |
| 11.28          | 1201             | 3512  |
| 11.3           | 1150             | 3442  |
| 11.32          | 1210             | 3485  |
| 11.34          | 1223             | 3460  |
| 11.36          | 1167             | 3449  |
| 11.38          | 1175             | 3485  |
| 11.4           | 1232             | 3472  |
| 11.42          | 1185             | 3518  |
| 11.44          | 1228             | 3504  |
| 11.46          | 1186             | 3504  |
| 11.48          | 1272             | 3545  |
| 11.5           | 1212             | 3523  |
| 11.52          | 1154             | 3504  |
| 11.54          | 1202             | 3510  |
| 11.56          | 1167             | 3497  |
| 11.58          | 1210             | 3487  |
| 11.6           | 1191             | 3514  |
| 11.62          | 1222             | 3495  |
| 11.64          | 1202             | 3484  |
| 11.66          | 1220             | 3487  |
| 11.68          | 1163             | 3513  |
| 11.7           | 1244             | 3470  |
| 11.72          | 1342             | 3547  |
| 11.74          | 1182             | 3506  |
| 11.76          | 1168             | 3546  |
| 11.78          | 1228             | 3587  |
| 11.8           | 1250             | 3490  |
| 11.82          | 1281             | 3552  |
| 11.84          | 1248             | 3485  |
| 11.86          | 1176             | 3458  |
| 11.88          | 1279             | 3569  |
| 11.9           | 1209             | 3591  |
| 11.92          | 1218             | 3603  |
| 11.94          | 1282             | 3561  |
| 11.96          | 1226             | 3503  |
| 11.98          | 1263             | 3525  |
| 12             | 1300             | 3525  |
| 12.02          | 1266             | 3511  |
| 12.04          | 1260             | 3531  |
| 12.06          | 1206             | 3526  |
| 12.08          | 1289             | 3451  |
| 12.1           | 1345             | 3566  |
| 12.12          | 1305             | 3501  |
| 12.14          | 1205             | 3534  |
| 12.16          | 1233             | 3593  |
| 12.18          | 1226             | 3562  |
| 12.2           | 1196             | 3526  |
| 12.22          | 1283             | 3503  |
| 12.24          | 1206             | 3483  |
| 12.26          | 1261             | 3506  |
| 12.28          | 1270             | 3573  |
| 12.3           | 1270             | 3495  |
| 12.32          | 1281             | 3568  |
| 12.34          | 1312             | 3548  |
| 12.36          | 1329             | 3484  |
| 12.38          | 1292             | 3464  |
| 12.4           | 1226             | 3556  |
| 12.42          | 1299             | 3497  |

| 2 $\theta$ (°) | Intencity (a.u.) |       |
|----------------|------------------|-------|
|                | Fe/S@CMIBWS      | MIBWS |
| 12.44          | 1259             | 3614  |
| 12.46          | 1271             | 3547  |
| 12.48          | 1268             | 3518  |
| 12.5           | 1252             | 3508  |
| 12.52          | 1305             | 3650  |
| 12.54          | 1316             | 3548  |
| 12.56          | 1260             | 3525  |
| 12.58          | 1307             | 3551  |
| 12.6           | 1298             | 3589  |
| 12.62          | 1232             | 3556  |
| 12.64          | 1335             | 3468  |
| 12.66          | 1292             | 3544  |
| 12.68          | 1371             | 3541  |
| 12.7           | 1242             | 3566  |
| 12.72          | 1308             | 3499  |
| 12.74          | 1261             | 3528  |
| 12.76          | 1321             | 3535  |
| 12.78          | 1285             | 3519  |
| 12.8           | 1346             | 3550  |
| 12.82          | 1347             | 3634  |
| 12.84          | 1342             | 3552  |
| 12.86          | 1339             | 3541  |
| 12.88          | 1354             | 3528  |
| 12.9           | 1318             | 3547  |
| 12.92          | 1307             | 3540  |
| 12.94          | 1377             | 3551  |
| 12.96          | 1354             | 3590  |
| 12.98          | 1380             | 3586  |
| 13             | 1357             | 3515  |
| 13.02          | 1372             | 3537  |
| 13.04          | 1345             | 3549  |
| 13.06          | 1412             | 3569  |
| 13.08          | 1370             | 3615  |
| 13.1           | 1388             | 3578  |
| 13.12          | 1322             | 3558  |
| 13.14          | 1341             | 3553  |
| 13.16          | 1328             | 3594  |
| 13.18          | 1358             | 3591  |
| 13.2           | 1359             | 3614  |
| 13.22          | 1364             | 3572  |
| 13.24          | 1413             | 3549  |
| 13.26          | 1294             | 3585  |
| 13.28          | 1355             | 3540  |
| 13.3           | 1384             | 3573  |
| 13.32          | 1291             | 3623  |
| 13.34          | 1337             | 3632  |
| 13.36          | 1388             | 3664  |
| 13.38          | 1336             | 3590  |
| 13.4           | 1317             | 3593  |
| 13.42          | 1391             | 3545  |
| 13.44          | 1430             | 3590  |
| 13.46          | 1370             | 3618  |
| 13.48          | 1370             | 3646  |
| 13.5           | 1404             | 3673  |
| 13.52          | 1427             | 3616  |
| 13.54          | 1394             | 3587  |
| 13.56          | 1456             | 3633  |
| 13.58          | 1434             | 3676  |
| 13.6           | 1386             | 3625  |
| 13.62          | 1412             | 3601  |
| 13.64          | 1432             | 3533  |
| 13.66          | 1424             | 3620  |



| 2 $\theta$ (°) | Intencity (a.u.) |       |
|----------------|------------------|-------|
|                | Fe/S@CMIBWS      | MIBWS |
| 13.68          | 1450             | 3634  |
| 13.7           | 1407             | 3610  |
| 13.72          | 1378             | 3640  |
| 13.74          | 1378             | 3637  |
| 13.76          | 1345             | 3589  |
| 13.78          | 1452             | 3583  |
| 13.8           | 1407             | 3623  |
| 13.82          | 1443             | 3601  |
| 13.84          | 1451             | 3615  |
| 13.86          | 1454             | 3640  |
| 13.88          | 1407             | 3633  |
| 13.9           | 1491             | 3623  |
| 13.92          | 1470             | 3592  |
| 13.94          | 1401             | 3601  |
| 13.96          | 1406             | 3611  |
| 13.98          | 1420             | 3618  |
| 14             | 1427             | 3650  |
| 14.02          | 1437             | 3615  |
| 14.04          | 1460             | 3659  |
| 14.06          | 1381             | 3625  |
| 14.08          | 1474             | 3634  |
| 14.1           | 1509             | 3606  |
| 14.12          | 1509             | 3630  |
| 14.14          | 1526             | 3645  |
| 14.16          | 1507             | 3641  |
| 14.18          | 1499             | 3621  |
| 14.2           | 1503             | 3644  |
| 14.22          | 1482             | 3688  |
| 14.24          | 1410             | 3602  |
| 14.26          | 1519             | 3608  |
| 14.28          | 1457             | 3573  |
| 14.3           | 1443             | 3639  |
| 14.32          | 1445             | 3583  |
| 14.34          | 1537             | 3579  |
| 14.36          | 1479             | 3578  |
| 14.38          | 1385             | 3600  |
| 14.4           | 1438             | 3633  |
| 14.42          | 1473             | 3597  |
| 14.44          | 1515             | 3610  |
| 14.46          | 1414             | 3607  |
| 14.48          | 1511             | 3656  |
| 14.5           | 1489             | 3603  |
| 14.52          | 1523             | 3601  |
| 14.54          | 1556             | 3603  |
| 14.56          | 1534             | 3649  |
| 14.58          | 1521             | 3607  |
| 14.6           | 1487             | 3607  |
| 14.62          | 1485             | 3602  |
| 14.64          | 1574             | 3639  |
| 14.66          | 1605             | 3634  |
| 14.68          | 1569             | 3626  |
| 14.7           | 1626             | 3640  |
| 14.72          | 1581             | 3634  |
| 14.74          | 1552             | 3685  |
| 14.76          | 1498             | 3639  |
| 14.78          | 1567             | 3597  |
| 14.8           | 1560             | 3659  |
| 14.82          | 1596             | 3632  |
| 14.84          | 1551             | 3603  |
| 14.86          | 1630             | 3646  |
| 14.88          | 1595             | 3701  |
| 14.9           | 1508             | 3650  |

| 2 $\theta$ (°) | Intencity (a.u.) |       |
|----------------|------------------|-------|
|                | Fe/S@CMIBWS      | MIBWS |
| 14.92          | 1551             | 3640  |
| 14.94          | 1579             | 3686  |
| 14.96          | 1584             | 3653  |
| 14.98          | 1659             | 3689  |
| 15             | 1546             | 3618  |
| 15.02          | 1678             | 3655  |
| 15.04          | 1694             | 3639  |
| 15.06          | 1637             | 3654  |
| 15.08          | 1634             | 3629  |
| 15.1           | 1536             | 3623  |
| 15.12          | 1610             | 3664  |
| 15.14          | 1591             | 3666  |
| 15.16          | 1562             | 3631  |
| 15.18          | 1613             | 3667  |
| 15.2           | 1654             | 3667  |
| 15.22          | 1621             | 3634  |
| 15.24          | 1619             | 3705  |
| 15.26          | 1629             | 3687  |
| 15.28          | 1665             | 3675  |
| 15.3           | 1595             | 3752  |
| 15.32          | 1674             | 3691  |
| 15.34          | 1710             | 3694  |
| 15.36          | 1699             | 3690  |
| 15.38          | 1658             | 3699  |
| 15.4           | 1648             | 3659  |
| 15.42          | 1668             | 3713  |
| 15.44          | 1633             | 3674  |
| 15.46          | 1651             | 3697  |
| 15.48          | 1620             | 3648  |
| 15.5           | 1679             | 3632  |
| 15.52          | 1675             | 3639  |
| 15.54          | 1665             | 3660  |
| 15.56          | 1809             | 3635  |
| 15.58          | 1742             | 3714  |
| 15.6           | 1682             | 3649  |
| 15.62          | 1757             | 3673  |
| 15.64          | 1746             | 3686  |
| 15.66          | 1723             | 3667  |
| 15.68          | 1660             | 3747  |
| 15.7           | 1717             | 3702  |
| 15.72          | 1718             | 3689  |
| 15.74          | 1766             | 3648  |
| 15.76          | 1718             | 3709  |
| 15.78          | 1712             | 3651  |
| 15.8           | 1738             | 3648  |
| 15.82          | 1731             | 3707  |
| 15.84          | 1825             | 3714  |
| 15.86          | 1753             | 3744  |
| 15.88          | 1698             | 3706  |
| 15.9           | 1800             | 3686  |
| 15.92          | 1727             | 3618  |
| 15.94          | 1777             | 3634  |
| 15.96          | 1748             | 3724  |
| 15.98          | 1765             | 3743  |
| 16             | 1748             | 3736  |
| 16.02          | 1810             | 3656  |
| 16.04          | 1757             | 3698  |
| 16.06          | 1774             | 3676  |
| 16.08          | 1780             | 3678  |
| 16.1           | 1711             | 3722  |
| 16.12          | 1756             | 3697  |
| 16.14          | 1796             | 3697  |

| 2 $\theta$ (°) | Intencity (a.u.) |       |
|----------------|------------------|-------|
|                | Fe/S@CMIBWS      | MIBWS |
| 16.16          | 1834             | 3693  |
| 16.18          | 1818             | 3667  |
| 16.2           | 1743             | 3666  |
| 16.22          | 1799             | 3700  |
| 16.24          | 1831             | 3663  |
| 16.26          | 1797             | 3691  |
| 16.28          | 1848             | 3638  |
| 16.3           | 1764             | 3676  |
| 16.32          | 1882             | 3668  |
| 16.34          | 1819             | 3665  |
| 16.36          | 1806             | 3662  |
| 16.38          | 1836             | 3723  |
| 16.4           | 1780             | 3759  |
| 16.42          | 1871             | 3663  |
| 16.44          | 1866             | 3759  |
| 16.46          | 1826             | 3766  |
| 16.48          | 1874             | 3762  |
| 16.5           | 1880             | 3708  |
| 16.52          | 1877             | 3715  |
| 16.54          | 1826             | 3684  |
| 16.56          | 1919             | 3741  |
| 16.58          | 1886             | 3677  |
| 16.6           | 1912             | 3685  |
| 16.62          | 1941             | 3713  |
| 16.64          | 1875             | 3692  |
| 16.66          | 1999             | 3671  |
| 16.68          | 1856             | 3654  |
| 16.7           | 1904             | 3652  |
| 16.72          | 1914             | 3671  |
| 16.74          | 1880             | 3699  |
| 16.76          | 1938             | 3705  |
| 16.78          | 1900             | 3702  |
| 16.8           | 1934             | 3690  |
| 16.82          | 1959             | 3646  |
| 16.84          | 1872             | 3622  |
| 16.86          | 1925             | 3727  |
| 16.88          | 1927             | 3757  |
| 16.9           | 1928             | 3717  |
| 16.92          | 1970             | 3756  |
| 16.94          | 1959             | 3678  |
| 16.96          | 1894             | 3697  |
| 16.98          | 1887             | 3764  |
| 17             | 1959             | 3732  |
| 17.02          | 1964             | 3734  |
| 17.04          | 2011             | 3693  |
| 17.06          | 2023             | 3826  |
| 17.08          | 1990             | 3653  |
| 17.1           | 1948             | 3661  |
| 17.12          | 1987             | 3715  |
| 17.14          | 2006             | 3710  |
| 17.16          | 2000             | 3665  |
| 17.18          | 1972             | 3740  |
| 17.2           | 1984             | 3688  |
| 17.22          | 1995             | 3682  |
| 17.24          | 2010             | 3803  |
| 17.26          | 1989             | 3727  |
| 17.28          | 1963             | 3780  |
| 17.3           | 1968             | 3768  |
| 17.32          | 2001             | 3729  |
| 17.34          | 1973             | 3706  |
| 17.36          | 1957             | 3734  |
| 17.38          | 1953             | 3695  |

| 2 $\theta$ (°) | Intencity (a.u.) |       |
|----------------|------------------|-------|
|                | Fe/S@CMIBWS      | MIBWS |
| 17.4           | 2015             | 3712  |
| 17.42          | 2009             | 3706  |
| 17.44          | 2044             | 3705  |
| 17.46          | 1953             | 3719  |
| 17.48          | 2042             | 3744  |
| 17.5           | 2003             | 3815  |
| 17.52          | 2036             | 3775  |
| 17.54          | 2072             | 3716  |
| 17.56          | 2079             | 3706  |
| 17.58          | 2055             | 3790  |
| 17.6           | 2054             | 3768  |
| 17.62          | 2042             | 3687  |
| 17.64          | 1992             | 3757  |
| 17.66          | 2077             | 3738  |
| 17.68          | 2063             | 3714  |
| 17.7           | 2046             | 3768  |
| 17.72          | 2021             | 3782  |
| 17.74          | 1965             | 3727  |
| 17.76          | 2014             | 3678  |
| 17.78          | 2147             | 3726  |
| 17.8           | 2102             | 3752  |
| 17.82          | 2090             | 3735  |
| 17.84          | 2085             | 3745  |
| 17.86          | 2070             | 3744  |
| 17.88          | 2090             | 3777  |
| 17.9           | 2134             | 3810  |
| 17.92          | 2041             | 3800  |
| 17.94          | 2026             | 3754  |
| 17.96          | 2155             | 3745  |
| 17.98          | 2101             | 3782  |
| 18             | 2145             | 3849  |
| 18.02          | 2119             | 3781  |
| 18.04          | 2084             | 3755  |
| 18.06          | 2101             | 3837  |
| 18.08          | 2160             | 3843  |
| 18.1           | 2168             | 3839  |
| 18.12          | 2181             | 3940  |
| 18.14          | 2160             | 3862  |
| 18.16          | 2112             | 3849  |
| 18.18          | 2095             | 3908  |
| 18.2           | 2070             | 3859  |
| 18.22          | 2122             | 3897  |
| 18.24          | 2181             | 3930  |
| 18.26          | 2233             | 3954  |
| 18.28          | 2114             | 3854  |
| 18.3           | 2074             | 3877  |
| 18.32          | 2169             | 3898  |
| 18.34          | 2231             | 3937  |
| 18.36          | 2238             | 3876  |
| 18.38          | 2237             | 3858  |
| 18.4           | 2186             | 3863  |
| 18.42          | 2174             | 3824  |
| 18.44          | 2209             | 3815  |
| 18.46          | 2126             | 3854  |
| 18.48          | 2206             | 3790  |
| 18.5           | 2147             | 3815  |
| 18.52          | 2162             | 3837  |
| 18.54          | 2192             | 3819  |
| 18.56          | 2202             | 3825  |
| 18.58          | 2197             | 3823  |
| 18.6           | 2214             | 3789  |
| 18.62          | 2232             | 3774  |

| 2 $\theta$ (°) | Intencity (a.u.) |       |
|----------------|------------------|-------|
|                | Fe/S@CMIBWS      | MIBWS |
| 18.64          | 2199             | 3787  |
| 18.66          | 2157             | 3746  |
| 18.68          | 2313             | 3753  |
| 18.7           | 2227             | 3836  |
| 18.72          | 2274             | 3758  |
| 18.74          | 2168             | 3803  |
| 18.76          | 2404             | 3797  |
| 18.78          | 2196             | 3742  |
| 18.8           | 2272             | 3733  |
| 18.82          | 2199             | 3702  |
| 18.84          | 2137             | 3697  |
| 18.86          | 2166             | 3736  |
| 18.88          | 2084             | 3680  |
| 18.9           | 2277             | 3753  |
| 18.92          | 2246             | 3686  |
| 18.94          | 2227             | 3729  |
| 18.96          | 2210             | 3744  |
| 18.98          | 2128             | 3723  |
| 19             | 2290             | 3738  |
| 19.02          | 2207             | 3745  |
| 19.04          | 2240             | 3771  |
| 19.06          | 2196             | 3693  |
| 19.08          | 2183             | 3738  |
| 19.1           | 2215             | 3758  |
| 19.12          | 2254             | 3793  |
| 19.14          | 2199             | 3731  |
| 19.16          | 2223             | 3829  |
| 19.18          | 2230             | 3804  |
| 19.2           | 2250             | 3767  |
| 19.22          | 2297             | 3742  |
| 19.24          | 2208             | 3729  |
| 19.26          | 2268             | 3790  |
| 19.28          | 2217             | 3725  |
| 19.3           | 2245             | 3792  |
| 19.32          | 2232             | 3832  |
| 19.34          | 2267             | 3744  |
| 19.36          | 2257             | 3754  |
| 19.38          | 2281             | 3703  |
| 19.4           | 2357             | 3760  |
| 19.42          | 2263             | 3816  |
| 19.44          | 2252             | 3812  |
| 19.46          | 2267             | 3764  |
| 19.48          | 2309             | 3692  |
| 19.5           | 2205             | 3857  |
| 19.52          | 2291             | 3811  |
| 19.54          | 2276             | 3783  |
| 19.56          | 2275             | 3775  |
| 19.58          | 2249             | 3808  |
| 19.6           | 2199             | 3791  |
| 19.62          | 2318             | 3783  |
| 19.64          | 2235             | 3851  |
| 19.66          | 2314             | 3839  |
| 19.68          | 2283             | 3812  |
| 19.7           | 2290             | 3822  |
| 19.72          | 2322             | 3815  |
| 19.74          | 2326             | 3784  |
| 19.76          | 2307             | 3783  |
| 19.78          | 2384             | 3836  |
| 19.8           | 2190             | 3768  |
| 19.82          | 2339             | 3795  |
| 19.84          | 2338             | 3760  |
| 19.86          | 2374             | 3820  |

| 2 $\theta$ (°) | Intencity (a.u.) |       |
|----------------|------------------|-------|
|                | Fe/S@CMIBWS      | MIBWS |
| 19.88          | 2312             | 3818  |
| 19.9           | 2329             | 3785  |
| 19.92          | 2309             | 3797  |
| 19.94          | 2250             | 3772  |
| 19.96          | 2328             | 3753  |
| 19.98          | 2303             | 3820  |
| 20             | 2322             | 3786  |
| 20.02          | 2273             | 3764  |
| 20.04          | 2350             | 3791  |
| 20.06          | 2314             | 3768  |
| 20.08          | 2215             | 3822  |
| 20.1           | 2268             | 3810  |
| 20.12          | 2301             | 3781  |
| 20.14          | 2306             | 3855  |
| 20.16          | 2300             | 3745  |
| 20.18          | 2293             | 3812  |
| 20.2           | 2321             | 3705  |
| 20.22          | 2257             | 3714  |
| 20.24          | 2285             | 3792  |
| 20.26          | 2316             | 3850  |
| 20.28          | 2316             | 3775  |
| 20.3           | 2329             | 3730  |
| 20.32          | 2276             | 3761  |
| 20.34          | 2283             | 3744  |
| 20.36          | 2285             | 3753  |
| 20.38          | 2338             | 3750  |
| 20.4           | 2428             | 3743  |
| 20.42          | 2287             | 3808  |
| 20.44          | 2285             | 3755  |
| 20.46          | 2238             | 3796  |
| 20.48          | 2324             | 3781  |
| 20.5           | 2324             | 3819  |
| 20.52          | 2310             | 3770  |
| 20.54          | 2337             | 3702  |
| 20.56          | 2291             | 3782  |
| 20.58          | 2220             | 3854  |
| 20.6           | 2311             | 3800  |
| 20.62          | 2218             | 3768  |
| 20.64          | 2282             | 3776  |
| 20.66          | 2271             | 3839  |
| 20.68          | 2304             | 3740  |
| 20.7           | 2317             | 3819  |
| 20.72          | 2275             | 3781  |
| 20.74          | 2329             | 3835  |
| 20.76          | 2215             | 3817  |
| 20.78          | 2318             | 3826  |
| 20.8           | 2314             | 3848  |
| 20.82          | 2249             | 3820  |
| 20.84          | 2287             | 3873  |
| 20.86          | 2286             | 3887  |
| 20.88          | 2313             | 3831  |
| 20.9           | 2299             | 3826  |
| 20.92          | 2283             | 3765  |
| 20.94          | 2299             | 3779  |
| 20.96          | 2382             | 3800  |
| 20.98          | 2303             | 3768  |
| 21             | 2337             | 3779  |
| 21.02          | 2284             | 3819  |
| 21.04          | 2305             | 3835  |
| 21.06          | 2237             | 3795  |
| 21.08          | 2354             | 3768  |
| 21.1           | 2241             | 3812  |

| 2 $\theta$ (°) | Intencity (a.u.) |       |
|----------------|------------------|-------|
|                | Fe/S@CMIBWS      | MIBWS |
| 21.12          | 2251             | 3777  |
| 21.14          | 2344             | 3810  |
| 21.16          | 2248             | 3782  |
| 21.18          | 2261             | 3799  |
| 21.2           | 2314             | 3716  |
| 21.22          | 2250             | 3806  |
| 21.24          | 2163             | 3764  |
| 21.26          | 2356             | 3842  |
| 21.28          | 2321             | 3776  |
| 21.3           | 2282             | 3799  |
| 21.32          | 2237             | 3797  |
| 21.34          | 2234             | 3747  |
| 21.36          | 2245             | 3789  |
| 21.38          | 2276             | 3715  |
| 21.4           | 2262             | 3780  |
| 21.42          | 2275             | 3741  |
| 21.44          | 2228             | 3807  |
| 21.46          | 2222             | 3793  |
| 21.48          | 2210             | 3743  |
| 21.5           | 2233             | 3731  |
| 21.52          | 2236             | 3747  |
| 21.54          | 2194             | 3788  |
| 21.56          | 2209             | 3775  |
| 21.58          | 2241             | 3895  |
| 21.6           | 2266             | 3755  |
| 21.62          | 2172             | 3840  |
| 21.64          | 2215             | 3815  |
| 21.66          | 2127             | 3776  |
| 21.68          | 2192             | 3798  |
| 21.7           | 2110             | 3805  |
| 21.72          | 2152             | 3761  |
| 21.74          | 2217             | 3855  |
| 21.76          | 2217             | 3803  |
| 21.78          | 2248             | 3770  |
| 21.8           | 2117             | 3744  |
| 21.82          | 2207             | 3755  |
| 21.84          | 2221             | 3771  |
| 21.86          | 2123             | 3810  |
| 21.88          | 2185             | 3850  |
| 21.9           | 2127             | 3776  |
| 21.92          | 2161             | 3792  |
| 21.94          | 2235             | 3829  |
| 21.96          | 2218             | 3780  |
| 21.98          | 2077             | 3832  |
| 22             | 2154             | 3792  |
| 22.02          | 2176             | 3801  |
| 22.04          | 2113             | 3765  |
| 22.06          | 2187             | 3794  |
| 22.08          | 2158             | 3756  |
| 22.1           | 2255             | 3808  |
| 22.12          | 2170             | 3789  |
| 22.14          | 2071             | 3889  |
| 22.16          | 2080             | 3815  |
| 22.18          | 2173             | 3709  |
| 22.2           | 2090             | 3752  |
| 22.22          | 2129             | 3784  |
| 22.24          | 2115             | 3825  |
| 22.26          | 2113             | 3723  |
| 22.28          | 2098             | 3803  |
| 22.3           | 2111             | 3808  |
| 22.32          | 2102             | 3753  |
| 22.34          | 2136             | 3851  |

| 2 $\theta$ (°) | Intencity (a.u.) |       |
|----------------|------------------|-------|
|                | Fe/S@CMIBWS      | MIBWS |
| 22.36          | 2032             | 3773  |
| 22.38          | 1998             | 3820  |
| 22.4           | 2021             | 3791  |
| 22.42          | 2157             | 3862  |
| 22.44          | 2077             | 3789  |
| 22.46          | 2107             | 3789  |
| 22.48          | 2076             | 3744  |
| 22.5           | 2014             | 3843  |
| 22.52          | 1995             | 3789  |
| 22.54          | 2052             | 3800  |
| 22.56          | 2078             | 3749  |
| 22.58          | 2039             | 3838  |
| 22.6           | 2020             | 3801  |
| 22.62          | 1994             | 3846  |
| 22.64          | 2102             | 3784  |
| 22.66          | 2045             | 3750  |
| 22.68          | 2039             | 3810  |
| 22.7           | 2026             | 3798  |
| 22.72          | 2043             | 3735  |
| 22.74          | 1973             | 3770  |
| 22.76          | 1993             | 3776  |
| 22.78          | 2044             | 3787  |
| 22.8           | 1988             | 3820  |
| 22.82          | 1965             | 3803  |
| 22.84          | 2036             | 3833  |
| 22.86          | 1943             | 3748  |
| 22.88          | 1905             | 3810  |
| 22.9           | 1912             | 3819  |
| 22.92          | 1981             | 3843  |
| 22.94          | 2004             | 3782  |
| 22.96          | 1978             | 3802  |
| 22.98          | 2012             | 3801  |
| 23             | 1935             | 3784  |
| 23.02          | 1979             | 3817  |
| 23.04          | 1930             | 3749  |
| 23.06          | 1907             | 3820  |
| 23.08          | 1930             | 3796  |
| 23.1           | 1900             | 3747  |
| 23.12          | 1914             | 3777  |
| 23.14          | 1941             | 3833  |
| 23.16          | 1936             | 3812  |
| 23.18          | 1937             | 3767  |
| 23.2           | 1822             | 3760  |
| 23.22          | 1956             | 3743  |
| 23.24          | 1957             | 3788  |
| 23.26          | 1897             | 3793  |
| 23.28          | 1918             | 3837  |
| 23.3           | 1964             | 3817  |
| 23.32          | 1978             | 3783  |
| 23.34          | 1859             | 3801  |
| 23.36          | 1896             | 3832  |
| 23.38          | 1867             | 3827  |
| 23.4           | 1954             | 3821  |
| 23.42          | 1823             | 3799  |
| 23.44          | 1897             | 3791  |
| 23.46          | 1857             | 3798  |
| 23.48          | 1859             | 3792  |
| 23.5           | 1879             | 3787  |
| 23.52          | 1900             | 3809  |
| 23.54          | 1893             | 3810  |
| 23.56          | 1907             | 3748  |
| 23.58          | 1876             | 3777  |



| 2 $\theta$ (°) | Intencity (a.u.) |       |
|----------------|------------------|-------|
|                | Fe/S@CMIBWS      | MIBWS |
| 23.6           | 1849             | 3821  |
| 23.62          | 1902             | 3760  |
| 23.64          | 1865             | 3718  |
| 23.66          | 1905             | 3804  |
| 23.68          | 1890             | 3776  |
| 23.7           | 1800             | 3822  |
| 23.72          | 1823             | 3756  |
| 23.74          | 1904             | 3778  |
| 23.76          | 1792             | 3796  |
| 23.78          | 1808             | 3754  |
| 23.8           | 1821             | 3756  |
| 23.82          | 1763             | 3791  |
| 23.84          | 1821             | 3762  |
| 23.86          | 1794             | 3748  |
| 23.88          | 1737             | 3782  |
| 23.9           | 1734             | 3724  |
| 23.92          | 1805             | 3837  |
| 23.94          | 1787             | 3798  |
| 23.96          | 1767             | 3802  |
| 23.98          | 1893             | 3769  |
| 24             | 1776             | 3805  |
| 24.02          | 1864             | 3825  |
| 24.04          | 1734             | 3811  |
| 24.06          | 1762             | 3750  |
| 24.08          | 1790             | 3757  |
| 24.1           | 1773             | 3797  |
| 24.12          | 1676             | 3784  |
| 24.14          | 1779             | 3716  |
| 24.16          | 1783             | 3773  |
| 24.18          | 1756             | 3804  |
| 24.2           | 1840             | 3779  |
| 24.22          | 1738             | 3789  |
| 24.24          | 1771             | 3770  |
| 24.26          | 1775             | 3789  |
| 24.28          | 1778             | 3806  |
| 24.3           | 1716             | 3808  |
| 24.32          | 1712             | 3811  |
| 24.34          | 1834             | 3752  |
| 24.36          | 1727             | 3807  |
| 24.38          | 1743             | 3770  |
| 24.4           | 1726             | 3751  |
| 24.42          | 1690             | 3783  |
| 24.44          | 1715             | 3761  |
| 24.46          | 1698             | 3821  |
| 24.48          | 1778             | 3761  |
| 24.5           | 1718             | 3743  |
| 24.52          | 1726             | 3809  |
| 24.54          | 1642             | 3891  |
| 24.56          | 1645             | 3793  |
| 24.58          | 1597             | 3814  |
| 24.6           | 1639             | 3804  |
| 24.62          | 1717             | 3832  |
| 24.64          | 1744             | 3783  |
| 24.66          | 1642             | 3753  |
| 24.68          | 1646             | 3743  |
| 24.7           | 1677             | 3753  |
| 24.72          | 1698             | 3802  |
| 24.74          | 1713             | 3726  |
| 24.76          | 1665             | 3771  |
| 24.78          | 1634             | 3794  |
| 24.8           | 1634             | 3766  |
| 24.82          | 1654             | 3825  |

| 2 $\theta$ (°) | Intencity (a.u.) |       |
|----------------|------------------|-------|
|                | Fe/S@CMIBWS      | MIBWS |
| 24.84          | 1661             | 3801  |
| 24.86          | 1644             | 3777  |
| 24.88          | 1590             | 3757  |
| 24.9           | 1645             | 3784  |
| 24.92          | 1694             | 3782  |
| 24.94          | 1615             | 3802  |
| 24.96          | 1599             | 3710  |
| 24.98          | 1549             | 3725  |
| 25             | 1646             | 3674  |
| 25.02          | 1603             | 3742  |
| 25.04          | 1646             | 3772  |
| 25.06          | 1560             | 3719  |
| 25.08          | 1603             | 3842  |
| 25.1           | 1629             | 3821  |
| 25.12          | 1601             | 3725  |
| 25.14          | 1599             | 3780  |
| 25.16          | 1571             | 3764  |
| 25.18          | 1623             | 3757  |
| 25.2           | 1584             | 3803  |
| 25.22          | 1643             | 3752  |
| 25.24          | 1579             | 3797  |
| 25.26          | 1605             | 3804  |
| 25.28          | 1571             | 3774  |
| 25.3           | 1525             | 3822  |
| 25.32          | 1523             | 3751  |
| 25.34          | 1607             | 3731  |
| 25.36          | 1545             | 3773  |
| 25.38          | 1594             | 3776  |
| 25.4           | 1532             | 3721  |
| 25.42          | 1557             | 3717  |
| 25.44          | 1598             | 3768  |
| 25.46          | 1581             | 3778  |
| 25.48          | 1542             | 3785  |
| 25.5           | 1581             | 3779  |
| 25.52          | 1614             | 3748  |
| 25.54          | 1553             | 3742  |
| 25.56          | 1536             | 3792  |
| 25.58          | 1572             | 3750  |
| 25.6           | 1546             | 3775  |
| 25.62          | 1472             | 3745  |
| 25.64          | 1469             | 3683  |
| 25.66          | 1578             | 3752  |
| 25.68          | 1527             | 3778  |
| 25.7           | 1608             | 3802  |
| 25.72          | 1492             | 3814  |
| 25.74          | 1563             | 3796  |
| 25.76          | 1606             | 3858  |
| 25.78          | 1533             | 3773  |
| 25.8           | 1546             | 3719  |
| 25.82          | 1586             | 3734  |
| 25.84          | 1545             | 3738  |
| 25.86          | 1487             | 3725  |
| 25.88          | 1452             | 3739  |
| 25.9           | 1550             | 3787  |
| 25.92          | 1535             | 3766  |
| 25.94          | 1521             | 3789  |
| 25.96          | 1518             | 3775  |
| 25.98          | 1503             | 3828  |
| 26             | 1510             | 3759  |
| 26.02          | 1491             | 3800  |
| 26.04          | 1528             | 3777  |
| 26.06          | 1538             | 3774  |

| 2 $\theta$ (°) | Intencity (a.u.) |       |
|----------------|------------------|-------|
|                | Fe/S@CMIBWS      | MIBWS |
| 26.08          | 1519             | 3796  |
| 26.1           | 1474             | 3745  |
| 26.12          | 1533             | 3758  |
| 26.14          | 1443             | 3821  |
| 26.16          | 1521             | 3772  |
| 26.18          | 1520             | 3764  |
| 26.2           | 1462             | 3816  |
| 26.22          | 1485             | 3829  |
| 26.24          | 1547             | 3713  |
| 26.26          | 1498             | 3796  |
| 26.28          | 1437             | 3795  |
| 26.3           | 1470             | 3819  |
| 26.32          | 1495             | 3794  |
| 26.34          | 1461             | 3777  |
| 26.36          | 1541             | 3760  |
| 26.38          | 1486             | 3761  |
| 26.4           | 1543             | 3811  |
| 26.42          | 1470             | 3848  |
| 26.44          | 1525             | 3892  |
| 26.46          | 1448             | 3805  |
| 26.48          | 1466             | 3860  |
| 26.5           | 1475             | 3918  |
| 26.52          | 1502             | 3966  |
| 26.54          | 1518             | 3974  |
| 26.56          | 1510             | 4084  |
| 26.58          | 1434             | 4089  |
| 26.6           | 1533             | 4087  |
| 26.62          | 1558             | 3891  |
| 26.64          | 1610             | 3886  |
| 26.66          | 1655             | 3925  |
| 26.68          | 1670             | 3835  |
| 26.7           | 1644             | 3873  |
| 26.72          | 1693             | 3820  |
| 26.74          | 1746             | 3706  |
| 26.76          | 1638             | 3818  |
| 26.78          | 1573             | 3847  |
| 26.8           | 1551             | 3810  |
| 26.82          | 1534             | 3737  |
| 26.84          | 1451             | 3814  |
| 26.86          | 1467             | 3803  |
| 26.88          | 1487             | 3734  |
| 26.9           | 1380             | 3761  |
| 26.92          | 1452             | 3750  |
| 26.94          | 1391             | 3788  |
| 26.96          | 1397             | 3741  |
| 26.98          | 1458             | 3770  |
| 27             | 1422             | 3785  |
| 27.02          | 1403             | 3721  |
| 27.04          | 1451             | 3796  |
| 27.06          | 1414             | 3770  |
| 27.08          | 1380             | 3785  |
| 27.1           | 1378             | 3754  |
| 27.12          | 1423             | 3801  |
| 27.14          | 1419             | 3730  |
| 27.16          | 1418             | 3779  |
| 27.18          | 1435             | 3774  |
| 27.2           | 1424             | 3774  |
| 27.22          | 1421             | 3795  |
| 27.24          | 1423             | 3770  |
| 27.26          | 1403             | 3762  |
| 27.28          | 1435             | 3753  |
| 27.3           | 1412             | 3708  |

| 2 $\theta$ (°) | Intencity (a.u.) |       |
|----------------|------------------|-------|
|                | Fe/S@CMIBWS      | MIBWS |
| 27.32          | 1459             | 3764  |
| 27.34          | 1450             | 3789  |
| 27.36          | 1423             | 3784  |
| 27.38          | 1512             | 3787  |
| 27.4           | 1541             | 3759  |
| 27.42          | 1548             | 3780  |
| 27.44          | 1529             | 3775  |
| 27.46          | 1414             | 3785  |
| 27.48          | 1457             | 3791  |
| 27.5           | 1376             | 3825  |
| 27.52          | 1394             | 3829  |
| 27.54          | 1378             | 3747  |
| 27.56          | 1392             | 3826  |
| 27.58          | 1414             | 3750  |
| 27.6           | 1355             | 3797  |
| 27.62          | 1382             | 3763  |
| 27.64          | 1382             | 3736  |
| 27.66          | 1384             | 3735  |
| 27.68          | 1406             | 3758  |
| 27.7           | 1414             | 3790  |
| 27.72          | 1393             | 3709  |
| 27.74          | 1419             | 3762  |
| 27.76          | 1364             | 3785  |
| 27.78          | 1373             | 3748  |
| 27.8           | 1393             | 3760  |
| 27.82          | 1388             | 3783  |
| 27.84          | 1380             | 3816  |
| 27.86          | 1316             | 3789  |
| 27.88          | 1395             | 3756  |
| 27.9           | 1369             | 3777  |
| 27.92          | 1375             | 3771  |
| 27.94          | 1333             | 3811  |
| 27.96          | 1371             | 3757  |
| 27.98          | 1442             | 3755  |
| 28             | 1381             | 3759  |
| 28.02          | 1342             | 3748  |
| 28.04          | 1396             | 3766  |
| 28.06          | 1421             | 3725  |
| 28.08          | 1307             | 3755  |
| 28.1           | 1329             | 3736  |
| 28.12          | 1358             | 3719  |
| 28.14          | 1384             | 3756  |
| 28.16          | 1335             | 3789  |
| 28.18          | 1324             | 3749  |
| 28.2           | 1348             | 3768  |
| 28.22          | 1347             | 3793  |
| 28.24          | 1301             | 3746  |
| 28.26          | 1348             | 3733  |
| 28.28          | 1376             | 3732  |
| 28.3           | 1319             | 3767  |
| 28.32          | 1402             | 3701  |
| 28.34          | 1282             | 3748  |
| 28.36          | 1304             | 3734  |
| 28.38          | 1357             | 3772  |
| 28.4           | 1402             | 3778  |
| 28.42          | 1296             | 3757  |
| 28.44          | 1393             | 3787  |
| 28.46          | 1386             | 3714  |
| 28.48          | 1377             | 3756  |
| 28.5           | 1328             | 3729  |
| 28.52          | 1315             | 3789  |
| 28.54          | 1314             | 3762  |

| 2 $\theta$ (°) | Intencity (a.u.) |       |
|----------------|------------------|-------|
|                | Fe/S@CMIBWS      | MIBWS |
| 28.56          | 1304             | 3810  |
| 28.58          | 1338             | 3778  |
| 28.6           | 1308             | 3772  |
| 28.62          | 1361             | 3761  |
| 28.64          | 1363             | 3784  |
| 28.66          | 1317             | 3755  |
| 28.68          | 1332             | 3768  |
| 28.7           | 1335             | 3685  |
| 28.72          | 1396             | 3735  |
| 28.74          | 1322             | 3710  |
| 28.76          | 1291             | 3752  |
| 28.78          | 1273             | 3780  |
| 28.8           | 1270             | 3702  |
| 28.82          | 1291             | 3787  |
| 28.84          | 1299             | 3730  |
| 28.86          | 1287             | 3789  |
| 28.88          | 1279             | 3749  |
| 28.9           | 1340             | 3758  |
| 28.92          | 1263             | 3723  |
| 28.94          | 1256             | 3767  |
| 28.96          | 1293             | 3769  |
| 28.98          | 1311             | 3732  |
| 29             | 1347             | 3771  |
| 29.02          | 1330             | 3789  |
| 29.04          | 1279             | 3753  |
| 29.06          | 1332             | 3803  |
| 29.08          | 1254             | 3749  |
| 29.1           | 1343             | 3734  |
| 29.12          | 1373             | 3749  |
| 29.14          | 1251             | 3765  |
| 29.16          | 1313             | 3727  |
| 29.18          | 1251             | 3761  |
| 29.2           | 1308             | 3717  |
| 29.22          | 1262             | 3839  |
| 29.24          | 1344             | 3822  |
| 29.26          | 1333             | 3785  |
| 29.28          | 1307             | 3789  |
| 29.3           | 1268             | 3808  |
| 29.32          | 1328             | 3745  |
| 29.34          | 1292             | 3851  |
| 29.36          | 1282             | 3738  |
| 29.38          | 1274             | 3821  |
| 29.4           | 1309             | 3783  |
| 29.42          | 1354             | 3817  |
| 29.44          | 1332             | 3857  |
| 29.46          | 1286             | 3779  |
| 29.48          | 1333             | 3815  |
| 29.5           | 1323             | 3858  |
| 29.52          | 1281             | 3800  |
| 29.54          | 1273             | 3845  |
| 29.56          | 1294             | 3848  |
| 29.58          | 1278             | 3811  |
| 29.6           | 1326             | 3845  |
| 29.62          | 1331             | 3824  |
| 29.64          | 1321             | 3936  |
| 29.66          | 1320             | 3878  |
| 29.68          | 1296             | 3993  |
| 29.7           | 1236             | 3881  |
| 29.72          | 1292             | 3944  |
| 29.74          | 1312             | 3893  |
| 29.76          | 1307             | 3958  |
| 29.78          | 1353             | 3991  |

| 2 $\theta$ (°) | Intencity (a.u.) |       |
|----------------|------------------|-------|
|                | Fe/S@CMIBWS      | MIBWS |
| 29.8           | 1331             | 3942  |
| 29.82          | 1320             | 4024  |
| 29.84          | 1348             | 4033  |
| 29.86          | 1349             | 4080  |
| 29.88          | 1346             | 4053  |
| 29.9           | 1323             | 4125  |
| 29.92          | 1376             | 4168  |
| 29.94          | 1351             | 4119  |
| 29.96          | 1416             | 4232  |
| 29.98          | 1398             | 4273  |
| 30             | 1419             | 4313  |
| 30.02          | 1382             | 4418  |
| 30.04          | 1380             | 4459  |
| 30.06          | 1430             | 4379  |
| 30.08          | 1404             | 4451  |
| 30.1           | 1498             | 4600  |
| 30.12          | 1506             | 4381  |
| 30.14          | 1471             | 4442  |
| 30.16          | 1533             | 4442  |
| 30.18          | 1506             | 4428  |
| 30.2           | 1478             | 4333  |
| 30.22          | 1551             | 4334  |
| 30.24          | 1535             | 4227  |
| 30.26          | 1518             | 4218  |
| 30.28          | 1517             | 4237  |
| 30.3           | 1432             | 4233  |
| 30.32          | 1401             | 4180  |
| 30.34          | 1516             | 4099  |
| 30.36          | 1450             | 4021  |
| 30.38          | 1454             | 4038  |
| 30.4           | 1446             | 4059  |
| 30.42          | 1425             | 3896  |
| 30.44          | 1423             | 3962  |
| 30.46          | 1385             | 3987  |
| 30.48          | 1399             | 3921  |
| 30.5           | 1374             | 3916  |
| 30.52          | 1398             | 3970  |
| 30.54          | 1350             | 3896  |
| 30.56          | 1365             | 3929  |
| 30.58          | 1382             | 3802  |
| 30.6           | 1297             | 3838  |
| 30.62          | 1305             | 3839  |
| 30.64          | 1347             | 3836  |
| 30.66          | 1329             | 3829  |
| 30.68          | 1310             | 3873  |
| 30.7           | 1278             | 3817  |
| 30.72          | 1254             | 3816  |
| 30.74          | 1268             | 3816  |
| 30.76          | 1286             | 3832  |
| 30.78          | 1323             | 3775  |
| 30.8           | 1274             | 3774  |
| 30.82          | 1344             | 3800  |
| 30.84          | 1280             | 3765  |
| 30.86          | 1282             | 3773  |
| 30.88          | 1315             | 3813  |
| 30.9           | 1289             | 3855  |
| 30.92          | 1295             | 3755  |
| 30.94          | 1294             | 3805  |
| 30.96          | 1307             | 3781  |
| 30.98          | 1288             | 3760  |
| 31             | 1272             | 3727  |
| 31.02          | 1224             | 3810  |

| 2 $\theta$ (°) | Intencity (a.u.) |       |
|----------------|------------------|-------|
|                | Fe/S@CMIBWS      | MIBWS |
| 31.04          | 1281             | 3764  |
| 31.06          | 1359             | 3790  |
| 31.08          | 1301             | 3740  |
| 31.1           | 1289             | 3706  |
| 31.12          | 1333             | 3751  |
| 31.14          | 1323             | 3758  |
| 31.16          | 1313             | 3703  |
| 31.18          | 1281             | 3739  |
| 31.2           | 1313             | 3774  |
| 31.22          | 1217             | 3736  |
| 31.24          | 1238             | 3793  |
| 31.26          | 1275             | 3696  |
| 31.28          | 1231             | 3734  |
| 31.3           | 1303             | 3737  |
| 31.32          | 1269             | 3715  |
| 31.34          | 1291             | 3742  |
| 31.36          | 1315             | 3751  |
| 31.38          | 1266             | 3765  |
| 31.4           | 1267             | 3759  |
| 31.42          | 1277             | 3777  |
| 31.44          | 1328             | 3734  |
| 31.46          | 1246             | 3687  |
| 31.48          | 1257             | 3758  |
| 31.5           | 1304             | 3797  |
| 31.52          | 1258             | 3702  |
| 31.54          | 1315             | 3738  |
| 31.56          | 1254             | 3709  |
| 31.58          | 1286             | 3785  |
| 31.6           | 1246             | 3734  |
| 31.62          | 1275             | 3694  |
| 31.64          | 1304             | 3752  |
| 31.66          | 1290             | 3734  |
| 31.68          | 1248             | 3706  |
| 31.7           | 1255             | 3780  |
| 31.72          | 1297             | 3764  |
| 31.74          | 1276             | 3753  |
| 31.76          | 1275             | 3765  |
| 31.78          | 1273             | 3710  |
| 31.8           | 1224             | 3782  |
| 31.82          | 1284             | 3718  |
| 31.84          | 1289             | 3755  |
| 31.86          | 1295             | 3734  |
| 31.88          | 1293             | 3727  |
| 31.9           | 1190             | 3719  |
| 31.92          | 1315             | 3729  |
| 31.94          | 1315             | 3700  |
| 31.96          | 1251             | 3834  |
| 31.98          | 1272             | 3778  |
| 32             | 1248             | 3810  |
| 32.02          | 1256             | 3748  |
| 32.04          | 1252             | 3714  |
| 32.06          | 1242             | 3709  |
| 32.08          | 1290             | 3740  |
| 32.1           | 1275             | 3751  |
| 32.12          | 1257             | 3739  |
| 32.14          | 1257             | 3763  |
| 32.16          | 1264             | 3721  |
| 32.18          | 1166             | 3741  |
| 32.2           | 1338             | 3639  |
| 32.22          | 1247             | 3677  |
| 32.24          | 1254             | 3737  |
| 32.26          | 1272             | 3742  |

| 2 $\theta$ (°) | Intencity (a.u.) |       |
|----------------|------------------|-------|
|                | Fe/S@CMIBWS      | MIBWS |
| 32.28          | 1262             | 3737  |
| 32.3           | 1235             | 3758  |
| 32.32          | 1322             | 3723  |
| 32.34          | 1236             | 3757  |
| 32.36          | 1285             | 3752  |
| 32.38          | 1244             | 3801  |
| 32.4           | 1207             | 3684  |
| 32.42          | 1249             | 3777  |
| 32.44          | 1206             | 3796  |
| 32.46          | 1223             | 3725  |
| 32.48          | 1223             | 3758  |
| 32.5           | 1264             | 3725  |
| 32.52          | 1233             | 3719  |
| 32.54          | 1252             | 3763  |
| 32.56          | 1245             | 3745  |
| 32.58          | 1249             | 3704  |
| 32.6           | 1256             | 3736  |
| 32.62          | 1230             | 3744  |
| 32.64          | 1230             | 3689  |
| 32.66          | 1300             | 3722  |
| 32.68          | 1201             | 3769  |
| 32.7           | 1303             | 3660  |
| 32.72          | 1277             | 3711  |
| 32.74          | 1226             | 3726  |
| 32.76          | 1290             | 3695  |
| 32.78          | 1266             | 3690  |
| 32.8           | 1258             | 3690  |
| 32.82          | 1246             | 3690  |
| 32.84          | 1226             | 3710  |
| 32.86          | 1357             | 3712  |
| 32.88          | 1224             | 3700  |
| 32.9           | 1239             | 3711  |
| 32.92          | 1273             | 3685  |
| 32.94          | 1235             | 3692  |
| 32.96          | 1285             | 3668  |
| 32.98          | 1248             | 3720  |
| 33             | 1263             | 3665  |
| 33.02          | 1247             | 3755  |
| 33.04          | 1238             | 3791  |
| 33.06          | 1245             | 3714  |
| 33.08          | 1266             | 3740  |
| 33.1           | 1257             | 3728  |
| 33.12          | 1224             | 3728  |
| 33.14          | 1303             | 3701  |
| 33.16          | 1241             | 3783  |
| 33.18          | 1227             | 3736  |
| 33.2           | 1251             | 3674  |
| 33.22          | 1263             | 3736  |
| 33.24          | 1209             | 3774  |
| 33.26          | 1229             | 3671  |
| 33.28          | 1293             | 3741  |
| 33.3           | 1219             | 3675  |
| 33.32          | 1341             | 3769  |
| 33.34          | 1362             | 3644  |
| 33.36          | 1286             | 3741  |
| 33.38          | 1273             | 3743  |
| 33.4           | 1261             | 3662  |
| 33.42          | 1258             | 3742  |
| 33.44          | 1268             | 3708  |
| 33.46          | 1257             | 3711  |
| 33.48          | 1340             | 3696  |
| 33.5           | 1262             | 3744  |



| 2 $\theta$ (°) | Intencity (a.u.) |       |
|----------------|------------------|-------|
|                | Fe/S@CMIBWS      | MIBWS |
| 33.52          | 1265             | 3674  |
| 33.54          | 1302             | 3674  |
| 33.56          | 1274             | 3698  |
| 33.58          | 1213             | 3694  |
| 33.6           | 1213             | 3750  |
| 33.62          | 1239             | 3786  |
| 33.64          | 1221             | 3730  |
| 33.66          | 1217             | 3735  |
| 33.68          | 1265             | 3712  |
| 33.7           | 1231             | 3700  |
| 33.72          | 1249             | 3695  |
| 33.74          | 1261             | 3749  |
| 33.76          | 1229             | 3733  |
| 33.78          | 1245             | 3725  |
| 33.8           | 1251             | 3684  |
| 33.82          | 1303             | 3795  |
| 33.84          | 1195             | 3730  |
| 33.86          | 1241             | 3779  |
| 33.88          | 1233             | 3692  |
| 33.9           | 1234             | 3743  |
| 33.92          | 1250             | 3720  |
| 33.94          | 1244             | 3715  |
| 33.96          | 1276             | 3770  |
| 33.98          | 1227             | 3771  |
| 34             | 1203             | 3777  |
| 34.02          | 1289             | 3766  |
| 34.04          | 1191             | 3749  |
| 34.06          | 1310             | 3725  |
| 34.08          | 1224             | 3727  |
| 34.1           | 1263             | 3725  |
| 34.12          | 1298             | 3780  |
| 34.14          | 1212             | 3769  |
| 34.16          | 1203             | 3765  |
| 34.18          | 1243             | 3765  |
| 34.2           | 1289             | 3822  |
| 34.22          | 1253             | 3720  |
| 34.24          | 1256             | 3813  |
| 34.26          | 1230             | 3840  |
| 34.28          | 1238             | 3800  |
| 34.3           | 1196             | 3719  |
| 34.32          | 1235             | 3826  |
| 34.34          | 1249             | 3852  |
| 34.36          | 1258             | 3839  |
| 34.38          | 1274             | 3808  |
| 34.4           | 1360             | 3827  |
| 34.42          | 1271             | 3808  |
| 34.44          | 1308             | 3861  |
| 34.46          | 1252             | 3837  |
| 34.48          | 1235             | 3889  |
| 34.5           | 1284             | 3902  |
| 34.52          | 1300             | 3862  |
| 34.54          | 1269             | 3913  |
| 34.56          | 1261             | 3834  |
| 34.58          | 1374             | 3856  |
| 34.6           | 1299             | 3832  |
| 34.62          | 1256             | 3924  |
| 34.64          | 1318             | 3909  |
| 34.66          | 1342             | 3849  |
| 34.68          | 1310             | 3868  |
| 34.7           | 1294             | 3825  |
| 34.72          | 1278             | 3905  |
| 34.74          | 1352             | 3940  |

| 2 $\theta$ (°) | Intencity (a.u.) |       |
|----------------|------------------|-------|
|                | Fe/S@CMIBWS      | MIBWS |
| 34.76          | 1342             | 3920  |
| 34.78          | 1330             | 3961  |
| 34.8           | 1313             | 3918  |
| 34.82          | 1371             | 3925  |
| 34.84          | 1309             | 3944  |
| 34.86          | 1315             | 4016  |
| 34.88          | 1340             | 3957  |
| 34.9           | 1328             | 4033  |
| 34.92          | 1355             | 4022  |
| 34.94          | 1288             | 3989  |
| 34.96          | 1398             | 4107  |
| 34.98          | 1348             | 4105  |
| 35             | 1354             | 4177  |
| 35.02          | 1419             | 4216  |
| 35.04          | 1309             | 4261  |
| 35.06          | 1335             | 4277  |
| 35.08          | 1302             | 4272  |
| 35.1           | 1388             | 4371  |
| 35.12          | 1439             | 4429  |
| 35.14          | 1365             | 4466  |
| 35.16          | 1393             | 4528  |
| 35.18          | 1386             | 4621  |
| 35.2           | 1429             | 4757  |
| 35.22          | 1414             | 4818  |
| 35.24          | 1485             | 4912  |
| 35.26          | 1431             | 5020  |
| 35.28          | 1485             | 5244  |
| 35.3           | 1517             | 5365  |
| 35.32          | 1511             | 5488  |
| 35.34          | 1595             | 5583  |
| 35.36          | 1638             | 5851  |
| 35.38          | 1644             | 6041  |
| 35.4           | 1763             | 5977  |
| 35.42          | 1687             | 6261  |
| 35.44          | 1761             | 6250  |
| 35.46          | 1871             | 6407  |
| 35.48          | 1965             | 6329  |
| 35.5           | 1981             | 6230  |
| 35.52          | 2027             | 6241  |
| 35.54          | 2030             | 6164  |
| 35.56          | 2085             | 5967  |
| 35.58          | 2147             | 5803  |
| 35.6           | 2005             | 5778  |
| 35.62          | 2131             | 5664  |
| 35.64          | 2013             | 5430  |
| 35.66          | 2125             | 5318  |
| 35.68          | 2068             | 5091  |
| 35.7           | 1942             | 5098  |
| 35.72          | 2035             | 4941  |
| 35.74          | 1923             | 4817  |
| 35.76          | 1940             | 4660  |
| 35.78          | 1887             | 4585  |
| 35.8           | 1803             | 4492  |
| 35.82          | 1778             | 4525  |
| 35.84          | 1721             | 4558  |
| 35.86          | 1682             | 4420  |
| 35.88          | 1632             | 4296  |
| 35.9           | 1561             | 4307  |
| 35.92          | 1574             | 4179  |
| 35.94          | 1531             | 4243  |
| 35.96          | 1497             | 4176  |
| 35.98          | 1358             | 4097  |

| 2 $\theta$ (°) | Intencity (a.u.) |       |
|----------------|------------------|-------|
|                | Fe/S@CMIBWS      | MIBWS |
| 36             | 1459             | 4114  |
| 36.02          | 1429             | 4101  |
| 36.04          | 1318             | 4041  |
| 36.06          | 1378             | 3986  |
| 36.08          | 1360             | 3956  |
| 36.1           | 1335             | 3938  |
| 36.12          | 1412             | 3938  |
| 36.14          | 1381             | 3922  |
| 36.16          | 1340             | 3880  |
| 36.18          | 1344             | 3893  |
| 36.2           | 1306             | 3924  |
| 36.22          | 1289             | 3936  |
| 36.24          | 1287             | 3893  |
| 36.26          | 1280             | 3874  |
| 36.28          | 1343             | 3824  |
| 36.3           | 1336             | 3852  |
| 36.32          | 1336             | 3857  |
| 36.34          | 1261             | 3856  |
| 36.36          | 1288             | 3846  |
| 36.38          | 1284             | 3847  |
| 36.4           | 1281             | 3820  |
| 36.42          | 1307             | 3886  |
| 36.44          | 1284             | 3836  |
| 36.46          | 1265             | 3870  |
| 36.48          | 1339             | 3824  |
| 36.5           | 1307             | 3808  |
| 36.52          | 1271             | 3806  |
| 36.54          | 1304             | 3820  |
| 36.56          | 1285             | 3848  |
| 36.58          | 1285             | 3797  |
| 36.6           | 1283             | 3841  |
| 36.62          | 1285             | 3721  |
| 36.64          | 1263             | 3785  |
| 36.66          | 1328             | 3792  |
| 36.68          | 1364             | 3738  |
| 36.7           | 1271             | 3795  |
| 36.72          | 1346             | 3731  |
| 36.74          | 1284             | 3719  |
| 36.76          | 1270             | 3776  |
| 36.78          | 1309             | 3790  |
| 36.8           | 1283             | 3760  |
| 36.82          | 1320             | 3886  |
| 36.84          | 1263             | 3815  |
| 36.86          | 1230             | 3761  |
| 36.88          | 1264             | 3796  |
| 36.9           | 1285             | 3810  |
| 36.92          | 1256             | 3812  |
| 36.94          | 1278             | 3839  |
| 36.96          | 1356             | 3838  |
| 36.98          | 1258             | 3871  |
| 37             | 1233             | 3855  |
| 37.02          | 1230             | 3792  |
| 37.04          | 1251             | 3837  |
| 37.06          | 1283             | 3817  |
| 37.08          | 1228             | 3911  |
| 37.1           | 1212             | 3816  |
| 37.12          | 1216             | 3875  |
| 37.14          | 1233             | 3812  |
| 37.16          | 1228             | 3811  |
| 37.18          | 1232             | 3780  |
| 37.2           | 1284             | 3848  |
| 37.22          | 1261             | 3797  |

| 2 $\theta$ (°) | Intencity (a.u.) |       |
|----------------|------------------|-------|
|                | Fe/S@CMIBWS      | MIBWS |
| 37.24          | 1258             | 3799  |
| 37.26          | 1278             | 3778  |
| 37.28          | 1256             | 3779  |
| 37.3           | 1149             | 3788  |
| 37.32          | 1246             | 3825  |
| 37.34          | 1246             | 3764  |
| 37.36          | 1281             | 3717  |
| 37.38          | 1223             | 3751  |
| 37.4           | 1240             | 3702  |
| 37.42          | 1253             | 3728  |
| 37.44          | 1207             | 3697  |
| 37.46          | 1228             | 3746  |
| 37.48          | 1245             | 3744  |
| 37.5           | 1184             | 3697  |
| 37.52          | 1181             | 3669  |
| 37.54          | 1220             | 3692  |
| 37.56          | 1203             | 3698  |
| 37.58          | 1252             | 3683  |
| 37.6           | 1223             | 3699  |
| 37.62          | 1181             | 3756  |
| 37.64          | 1206             | 3699  |
| 37.66          | 1166             | 3685  |
| 37.68          | 1228             | 3654  |
| 37.7           | 1172             | 3660  |
| 37.72          | 1147             | 3675  |
| 37.74          | 1152             | 3723  |
| 37.76          | 1206             | 3662  |
| 37.78          | 1245             | 3709  |
| 37.8           | 1193             | 3731  |
| 37.82          | 1117             | 3640  |
| 37.84          | 1220             | 3618  |
| 37.86          | 1212             | 3678  |
| 37.88          | 1228             | 3631  |
| 37.9           | 1190             | 3707  |
| 37.92          | 1213             | 3702  |
| 37.94          | 1213             | 3634  |
| 37.96          | 1244             | 3630  |
| 37.98          | 1147             | 3644  |
| 38             | 1145             | 3684  |
| 38.02          | 1189             | 3630  |
| 38.04          | 1144             | 3689  |
| 38.06          | 1127             | 3635  |
| 38.08          | 1180             | 3633  |
| 38.1           | 1117             | 3631  |
| 38.12          | 1172             | 3652  |
| 38.14          | 1185             | 3661  |
| 38.16          | 1154             | 3678  |
| 38.18          | 1166             | 3622  |
| 38.2           | 1166             | 3628  |
| 38.22          | 1096             | 3620  |
| 38.24          | 1134             | 3722  |
| 38.26          | 1156             | 3621  |
| 38.28          | 1211             | 3669  |
| 38.3           | 1129             | 3622  |
| 38.32          | 1201             | 3624  |
| 38.34          | 1162             | 3679  |
| 38.36          | 1181             | 3656  |
| 38.38          | 1127             | 3597  |
| 38.4           | 1162             | 3593  |
| 38.42          | 1153             | 3656  |
| 38.44          | 1151             | 3679  |
| 38.46          | 1181             | 3640  |

| 2 $\theta$ (°) | Intencity (a.u.) |       |
|----------------|------------------|-------|
|                | Fe/S@CMIBWS      | MIBWS |
| 38.48          | 1146             | 3674  |
| 38.5           | 1228             | 3665  |
| 38.52          | 1175             | 3594  |
| 38.54          | 1180             | 3586  |
| 38.56          | 1159             | 3657  |
| 38.58          | 1155             | 3640  |
| 38.6           | 1143             | 3627  |
| 38.62          | 1151             | 3631  |
| 38.64          | 1155             | 3628  |
| 38.66          | 1185             | 3642  |
| 38.68          | 1096             | 3687  |
| 38.7           | 1200             | 3698  |
| 38.72          | 1147             | 3651  |
| 38.74          | 1161             | 3724  |
| 38.76          | 1199             | 3624  |
| 38.78          | 1103             | 3634  |
| 38.8           | 1150             | 3685  |
| 38.82          | 1145             | 3617  |
| 38.84          | 1164             | 3663  |
| 38.86          | 1132             | 3707  |
| 38.88          | 1172             | 3678  |
| 38.9           | 1113             | 3650  |
| 38.92          | 1189             | 3610  |
| 38.94          | 1167             | 3583  |
| 38.96          | 1112             | 3663  |
| 38.98          | 1203             | 3617  |
| 39             | 1174             | 3603  |
| 39.02          | 1160             | 3659  |
| 39.04          | 1141             | 3632  |
| 39.06          | 1127             | 3633  |
| 39.08          | 1148             | 3665  |
| 39.1           | 1166             | 3683  |
| 39.12          | 1115             | 3638  |
| 39.14          | 1175             | 3620  |
| 39.16          | 1190             | 3639  |
| 39.18          | 1180             | 3584  |
| 39.2           | 1151             | 3595  |
| 39.22          | 1153             | 3673  |
| 39.24          | 1174             | 3677  |
| 39.26          | 1165             | 3601  |
| 39.28          | 1195             | 3634  |
| 39.3           | 1197             | 3655  |
| 39.32          | 1109             | 3672  |
| 39.34          | 1155             | 3599  |
| 39.36          | 1139             | 3668  |
| 39.38          | 1155             | 3685  |
| 39.4           | 1141             | 3671  |
| 39.42          | 1125             | 3693  |
| 39.44          | 1143             | 3640  |
| 39.46          | 1147             | 3658  |
| 39.48          | 1154             | 3617  |
| 39.5           | 1107             | 3625  |
| 39.52          | 1155             | 3682  |
| 39.54          | 1198             | 3661  |
| 39.56          | 1100             | 3609  |
| 39.58          | 1173             | 3643  |
| 39.6           | 1189             | 3647  |
| 39.62          | 1161             | 3652  |
| 39.64          | 1183             | 3666  |
| 39.66          | 1130             | 3640  |
| 39.68          | 1126             | 3650  |
| 39.7           | 1185             | 3676  |

| 2 $\theta$ (°) | Intencity (a.u.) |       |
|----------------|------------------|-------|
|                | Fe/S@CMIBWS      | MIBWS |
| 39.72          | 1127             | 3661  |
| 39.74          | 1156             | 3661  |
| 39.76          | 1174             | 3640  |
| 39.78          | 1169             | 3629  |
| 39.8           | 1101             | 3644  |
| 39.82          | 1075             | 3605  |
| 39.84          | 1130             | 3627  |
| 39.86          | 1135             | 3613  |
| 39.88          | 1136             | 3609  |
| 39.9           | 1108             | 3612  |
| 39.92          | 1151             | 3586  |
| 39.94          | 1118             | 3632  |
| 39.96          | 1160             | 3679  |
| 39.98          | 1176             | 3643  |
| 40             | 1091             | 3635  |
| 40.02          | 1088             | 3624  |
| 40.04          | 1167             | 3633  |
| 40.06          | 1169             | 3626  |
| 40.08          | 1197             | 3614  |
| 40.1           | 1166             | 3612  |
| 40.12          | 1175             | 3594  |
| 40.14          | 1132             | 3631  |
| 40.16          | 1149             | 3621  |
| 40.18          | 1151             | 3585  |
| 40.2           | 1148             | 3658  |
| 40.22          | 1150             | 3611  |
| 40.24          | 1128             | 3606  |
| 40.26          | 1204             | 3621  |
| 40.28          | 1203             | 3669  |
| 40.3           | 1106             | 3623  |
| 40.32          | 1094             | 3664  |
| 40.34          | 1147             | 3581  |
| 40.36          | 1121             | 3699  |
| 40.38          | 1122             | 3615  |
| 40.4           | 1102             | 3548  |
| 40.42          | 1147             | 3633  |
| 40.44          | 1182             | 3602  |
| 40.46          | 1172             | 3605  |
| 40.48          | 1155             | 3686  |
| 40.5           | 1113             | 3593  |
| 40.52          | 1111             | 3628  |
| 40.54          | 1175             | 3656  |
| 40.56          | 1118             | 3637  |
| 40.58          | 1127             | 3655  |
| 40.6           | 1156             | 3621  |
| 40.62          | 1102             | 3512  |
| 40.64          | 1136             | 3633  |
| 40.66          | 1155             | 3624  |
| 40.68          | 1122             | 3581  |
| 40.7           | 1133             | 3619  |
| 40.72          | 1053             | 3678  |
| 40.74          | 1136             | 3617  |
| 40.76          | 1138             | 3557  |
| 40.78          | 1150             | 3582  |
| 40.8           | 1119             | 3616  |
| 40.82          | 1110             | 3637  |
| 40.84          | 1090             | 3559  |
| 40.86          | 1095             | 3657  |
| 40.88          | 1137             | 3663  |
| 40.9           | 1100             | 3544  |
| 40.92          | 1093             | 3617  |
| 40.94          | 1159             | 3606  |

| 2 $\theta$ (°) | Intencity (a.u.) |       |
|----------------|------------------|-------|
|                | Fe/S@CMIBWS      | MIBWS |
| 40.96          | 1168             | 3583  |
| 40.98          | 1059             | 3653  |
| 41             | 1137             | 3641  |
| 41.02          | 1192             | 3684  |
| 41.04          | 1140             | 3576  |
| 41.06          | 1102             | 3640  |
| 41.08          | 1132             | 3580  |
| 41.1           | 1125             | 3642  |
| 41.12          | 1149             | 3610  |
| 41.14          | 1087             | 3580  |
| 41.16          | 1138             | 3656  |
| 41.18          | 1118             | 3640  |
| 41.2           | 1108             | 3628  |
| 41.22          | 1115             | 3662  |
| 41.24          | 1132             | 3612  |
| 41.26          | 1180             | 3640  |
| 41.28          | 1110             | 3602  |
| 41.3           | 1102             | 3622  |
| 41.32          | 1067             | 3656  |
| 41.34          | 1185             | 3665  |
| 41.36          | 1103             | 3646  |
| 41.38          | 1051             | 3637  |
| 41.4           | 1114             | 3635  |
| 41.42          | 1157             | 3646  |
| 41.44          | 1140             | 3593  |
| 41.46          | 1131             | 3608  |
| 41.48          | 1072             | 3647  |
| 41.5           | 1175             | 3644  |
| 41.52          | 1137             | 3662  |
| 41.54          | 1173             | 3601  |
| 41.56          | 1107             | 3630  |
| 41.58          | 1048             | 3668  |
| 41.6           | 1121             | 3682  |
| 41.62          | 1092             | 3581  |
| 41.64          | 1132             | 3597  |
| 41.66          | 1111             | 3659  |
| 41.68          | 1080             | 3574  |
| 41.7           | 1102             | 3627  |
| 41.72          | 1099             | 3663  |
| 41.74          | 1056             | 3663  |
| 41.76          | 1073             | 3624  |
| 41.78          | 1133             | 3606  |
| 41.8           | 1141             | 3637  |
| 41.82          | 1057             | 3624  |
| 41.84          | 1091             | 3594  |
| 41.86          | 1095             | 3653  |
| 41.88          | 1136             | 3636  |
| 41.9           | 1144             | 3606  |
| 41.92          | 1048             | 3724  |
| 41.94          | 1093             | 3650  |
| 41.96          | 1100             | 3595  |
| 41.98          | 1122             | 3642  |
| 42             | 1170             | 3610  |
| 42.02          | 1121             | 3644  |
| 42.04          | 1094             | 3644  |
| 42.06          | 1024             | 3702  |
| 42.08          | 1069             | 3612  |
| 42.1           | 1109             | 3604  |
| 42.12          | 1141             | 3669  |
| 42.14          | 1059             | 3658  |
| 42.16          | 1110             | 3679  |
| 42.18          | 1083             | 3608  |

| 2 $\theta$ (°) | Intencity (a.u.) |       |
|----------------|------------------|-------|
|                | Fe/S@CMIBWS      | MIBWS |
| 42.2           | 1104             | 3618  |
| 42.22          | 1104             | 3616  |
| 42.24          | 1089             | 3596  |
| 42.26          | 1019             | 3641  |
| 42.28          | 1096             | 3619  |
| 42.3           | 1069             | 3649  |
| 42.32          | 1130             | 3677  |
| 42.34          | 1104             | 3635  |
| 42.36          | 1122             | 3622  |
| 42.38          | 1074             | 3702  |
| 42.4           | 1085             | 3641  |
| 42.42          | 1125             | 3627  |
| 42.44          | 1022             | 3629  |
| 42.46          | 1076             | 3702  |
| 42.48          | 1104             | 3679  |
| 42.5           | 1033             | 3657  |
| 42.52          | 1086             | 3698  |
| 42.54          | 1089             | 3686  |
| 42.56          | 1093             | 3630  |
| 42.58          | 1076             | 3648  |
| 42.6           | 1126             | 3676  |
| 42.62          | 1115             | 3741  |
| 42.64          | 1114             | 3681  |
| 42.66          | 1071             | 3710  |
| 42.68          | 1156             | 3734  |
| 42.7           | 1096             | 3681  |
| 42.72          | 1091             | 3723  |
| 42.74          | 1090             | 3807  |
| 42.76          | 1150             | 3763  |
| 42.78          | 1107             | 3762  |
| 42.8           | 1137             | 3764  |
| 42.82          | 1132             | 3746  |
| 42.84          | 1118             | 3810  |
| 42.86          | 1134             | 3857  |
| 42.88          | 1163             | 3908  |
| 42.9           | 1131             | 3912  |
| 42.92          | 1104             | 3894  |
| 42.94          | 1139             | 3948  |
| 42.96          | 1166             | 3986  |
| 42.98          | 1197             | 4087  |
| 43             | 1146             | 4063  |
| 43.02          | 1123             | 4096  |
| 43.04          | 1101             | 4105  |
| 43.06          | 1204             | 4219  |
| 43.08          | 1120             | 4234  |
| 43.1           | 1166             | 4262  |
| 43.12          | 1169             | 4240  |
| 43.14          | 1259             | 4293  |
| 43.16          | 1245             | 4177  |
| 43.18          | 1258             | 4234  |
| 43.2           | 1227             | 4148  |
| 43.22          | 1237             | 4163  |
| 43.24          | 1286             | 4109  |
| 43.26          | 1285             | 4095  |
| 43.28          | 1257             | 4097  |
| 43.3           | 1272             | 4062  |
| 43.32          | 1242             | 3992  |
| 43.34          | 1242             | 3937  |
| 43.36          | 1318             | 3971  |
| 43.38          | 1226             | 3872  |
| 43.4           | 1194             | 3872  |
| 43.42          | 1223             | 3869  |



| 2 $\theta$ (°) | Intencity (a.u.) |       |
|----------------|------------------|-------|
|                | Fe/S@CMIBWS      | MIBWS |
| 43.44          | 1241             | 3828  |
| 43.46          | 1233             | 3800  |
| 43.48          | 1205             | 3817  |
| 43.5           | 1172             | 3821  |
| 43.52          | 1191             | 3802  |
| 43.54          | 1144             | 3794  |
| 43.56          | 1206             | 3750  |
| 43.58          | 1190             | 3759  |
| 43.6           | 1136             | 3706  |
| 43.62          | 1103             | 3784  |
| 43.64          | 1123             | 3662  |
| 43.66          | 1107             | 3733  |
| 43.68          | 1146             | 3662  |
| 43.7           | 1071             | 3686  |
| 43.72          | 1101             | 3665  |
| 43.74          | 1080             | 3677  |
| 43.76          | 1086             | 3687  |
| 43.78          | 1093             | 3663  |
| 43.8           | 1126             | 3655  |
| 43.82          | 1087             | 3660  |
| 43.84          | 996              | 3638  |
| 43.86          | 1075             | 3649  |
| 43.88          | 1150             | 3666  |
| 43.9           | 1103             | 3623  |
| 43.92          | 1050             | 3621  |
| 43.94          | 1108             | 3622  |
| 43.96          | 1087             | 3565  |
| 43.98          | 1103             | 3591  |
| 44             | 1142             | 3637  |
| 44.02          | 1096             | 3647  |
| 44.04          | 1058             | 3629  |
| 44.06          | 1091             | 3571  |
| 44.08          | 1070             | 3667  |
| 44.1           | 1134             | 3597  |
| 44.12          | 1056             | 3647  |
| 44.14          | 1119             | 3617  |
| 44.16          | 1054             | 3601  |
| 44.18          | 1065             | 3651  |
| 44.2           | 1089             | 3651  |
| 44.22          | 1065             | 3639  |
| 44.24          | 1042             | 3599  |
| 44.26          | 1024             | 3642  |
| 44.28          | 1033             | 3605  |
| 44.3           | 1018             | 3625  |
| 44.32          | 1044             | 3655  |
| 44.34          | 1076             | 3662  |
| 44.36          | 1061             | 3514  |
| 44.38          | 1076             | 3588  |
| 44.4           | 1044             | 3611  |
| 44.42          | 1094             | 3586  |
| 44.44          | 1033             | 3593  |
| 44.46          | 1036             | 3599  |
| 44.48          | 995              | 3595  |
| 44.5           | 1039             | 3585  |
| 44.52          | 1022             | 3612  |
| 44.54          | 1068             | 3592  |
| 44.56          | 1084             | 3606  |
| 44.58          | 1059             | 3603  |
| 44.6           | 1035             | 3685  |
| 44.62          | 1072             | 3623  |
| 44.64          | 1039             | 3611  |
| 44.66          | 1123             | 3633  |

| 2 $\theta$ (°) | Intencity (a.u.) |       |
|----------------|------------------|-------|
|                | Fe/S@CMIBWS      | MIBWS |
| 44.68          | 992              | 3583  |
| 44.7           | 1041             | 3617  |
| 44.72          | 1029             | 3558  |
| 44.74          | 1059             | 3563  |
| 44.76          | 1089             | 3610  |
| 44.78          | 1123             | 3639  |
| 44.8           | 1047             | 3632  |
| 44.82          | 1054             | 3620  |
| 44.84          | 1066             | 3631  |
| 44.86          | 1031             | 3621  |
| 44.88          | 1052             | 3656  |
| 44.9           | 1031             | 3611  |
| 44.92          | 1042             | 3621  |
| 44.94          | 1067             | 3578  |
| 44.96          | 1058             | 3584  |
| 44.98          | 1026             | 3640  |
| 45             | 1107             | 3633  |
| 45.02          | 1069             | 3622  |
| 45.04          | 1028             | 3556  |
| 45.06          | 1030             | 3657  |
| 45.08          | 1074             | 3640  |
| 45.1           | 1043             | 3625  |
| 45.12          | 1035             | 3577  |
| 45.14          | 1057             | 3553  |
| 45.16          | 1043             | 3623  |
| 45.18          | 1088             | 3589  |
| 45.2           | 1039             | 3606  |
| 45.22          | 1039             | 3626  |
| 45.24          | 1001             | 3576  |
| 45.26          | 1128             | 3539  |
| 45.28          | 1014             | 3604  |
| 45.3           | 1068             | 3610  |
| 45.32          | 1021             | 3632  |
| 45.34          | 1031             | 3635  |
| 45.36          | 1032             | 3571  |
| 45.38          | 1033             | 3601  |
| 45.4           | 1060             | 3578  |
| 45.42          | 1036             | 3631  |
| 45.44          | 1053             | 3607  |
| 45.46          | 1030             | 3631  |
| 45.48          | 1012             | 3585  |
| 45.5           | 1027             | 3621  |
| 45.52          | 1037             | 3640  |
| 45.54          | 1128             | 3635  |
| 45.56          | 1079             | 3606  |
| 45.58          | 1085             | 3637  |
| 45.6           | 1018             | 3563  |
| 45.62          | 1069             | 3634  |
| 45.64          | 1033             | 3565  |
| 45.66          | 1049             | 3648  |
| 45.68          | 1067             | 3606  |
| 45.7           | 1065             | 3552  |
| 45.72          | 1036             | 3574  |
| 45.74          | 1075             | 3636  |
| 45.76          | 1046             | 3589  |
| 45.78          | 1038             | 3668  |
| 45.8           | 1134             | 3583  |
| 45.82          | 1086             | 3664  |
| 45.84          | 1099             | 3646  |
| 45.86          | 1045             | 3606  |
| 45.88          | 1005             | 3585  |
| 45.9           | 1075             | 3649  |

| 2 $\theta$ (°) | Intencity (a.u.) |       |
|----------------|------------------|-------|
|                | Fe/S@CMIBWS      | MIBWS |
| 45.92          | 1084             | 3599  |
| 45.94          | 1074             | 3619  |
| 45.96          | 1039             | 3649  |
| 45.98          | 1138             | 3563  |
| 46             | 1091             | 3616  |
| 46.02          | 1036             | 3589  |
| 46.04          | 1073             | 3590  |
| 46.06          | 1032             | 3554  |
| 46.08          | 1062             | 3651  |
| 46.1           | 1024             | 3623  |
| 46.12          | 1014             | 3533  |
| 46.14          | 1046             | 3587  |
| 46.16          | 1042             | 3578  |
| 46.18          | 1091             | 3587  |
| 46.2           | 1022             | 3605  |
| 46.22          | 989              | 3620  |
| 46.24          | 1048             | 3615  |
| 46.26          | 1015             | 3612  |
| 46.28          | 1053             | 3625  |
| 46.3           | 1001             | 3655  |
| 46.32          | 1018             | 3601  |
| 46.34          | 1027             | 3608  |
| 46.36          | 1002             | 3545  |
| 46.38          | 1036             | 3592  |
| 46.4           | 1093             | 3580  |
| 46.42          | 1042             | 3578  |
| 46.44          | 1016             | 3544  |
| 46.46          | 1059             | 3594  |
| 46.48          | 1071             | 3511  |
| 46.5           | 1003             | 3601  |
| 46.52          | 1061             | 3598  |
| 46.54          | 1037             | 3578  |
| 46.56          | 1025             | 3623  |
| 46.58          | 1072             | 3637  |
| 46.6           | 1019             | 3582  |
| 46.62          | 1049             | 3593  |
| 46.64          | 1021             | 3618  |
| 46.66          | 985              | 3615  |
| 46.68          | 1069             | 3619  |
| 46.7           | 980              | 3605  |
| 46.72          | 1016             | 3564  |
| 46.74          | 1077             | 3595  |
| 46.76          | 986              | 3546  |
| 46.78          | 1024             | 3607  |
| 46.8           | 1113             | 3615  |
| 46.82          | 1083             | 3581  |
| 46.84          | 984              | 3559  |
| 46.86          | 1024             | 3599  |
| 46.88          | 1040             | 3568  |
| 46.9           | 995              | 3533  |
| 46.92          | 1020             | 3473  |
| 46.94          | 1072             | 3627  |
| 46.96          | 996              | 3564  |
| 46.98          | 1062             | 3594  |
| 47             | 1075             | 3576  |
| 47.02          | 1024             | 3598  |
| 47.04          | 1056             | 3555  |
| 47.06          | 1030             | 3577  |
| 47.08          | 989              | 3640  |
| 47.1           | 1042             | 3568  |
| 47.12          | 1018             | 3590  |
| 47.14          | 1095             | 3544  |

| 2 $\theta$ (°) | Intencity (a.u.) |       |
|----------------|------------------|-------|
|                | Fe/S@CMIBWS      | MIBWS |
| 47.16          | 1015             | 3613  |
| 47.18          | 1077             | 3621  |
| 47.2           | 1008             | 3618  |
| 47.22          | 959              | 3585  |
| 47.24          | 1028             | 3610  |
| 47.26          | 985              | 3566  |
| 47.28          | 1009             | 3590  |
| 47.3           | 1045             | 3600  |
| 47.32          | 996              | 3640  |
| 47.34          | 997              | 3612  |
| 47.36          | 965              | 3534  |
| 47.38          | 1007             | 3634  |
| 47.4           | 1018             | 3561  |
| 47.42          | 968              | 3600  |
| 47.44          | 1038             | 3558  |
| 47.46          | 993              | 3638  |
| 47.48          | 977              | 3624  |
| 47.5           | 1037             | 3683  |
| 47.52          | 1029             | 3605  |
| 47.54          | 995              | 3585  |
| 47.56          | 980              | 3573  |
| 47.58          | 999              | 3587  |
| 47.6           | 1058             | 3589  |
| 47.62          | 993              | 3613  |
| 47.64          | 970              | 3586  |
| 47.66          | 1028             | 3631  |
| 47.68          | 1034             | 3626  |
| 47.7           | 1005             | 3559  |
| 47.72          | 994              | 3614  |
| 47.74          | 993              | 3627  |
| 47.76          | 1033             | 3620  |
| 47.78          | 986              | 3526  |
| 47.8           | 1052             | 3574  |
| 47.82          | 1009             | 3580  |
| 47.84          | 1010             | 3556  |
| 47.86          | 1029             | 3589  |
| 47.88          | 1046             | 3568  |
| 47.9           | 1038             | 3584  |
| 47.92          | 1012             | 3595  |
| 47.94          | 1050             | 3576  |
| 47.96          | 1025             | 3588  |
| 47.98          | 972              | 3627  |
| 48             | 1011             | 3574  |
| 48.02          | 1048             | 3589  |
| 48.04          | 961              | 3573  |
| 48.06          | 1039             | 3596  |
| 48.08          | 1003             | 3516  |
| 48.1           | 1018             | 3588  |
| 48.12          | 1013             | 3618  |
| 48.14          | 1021             | 3606  |
| 48.16          | 1005             | 3580  |
| 48.18          | 1042             | 3652  |
| 48.2           | 1054             | 3552  |
| 48.22          | 982              | 3646  |
| 48.24          | 1044             | 3581  |
| 48.26          | 1016             | 3555  |
| 48.28          | 1005             | 3585  |
| 48.3           | 1016             | 3537  |
| 48.32          | 1024             | 3571  |
| 48.34          | 983              | 3572  |
| 48.36          | 1008             | 3583  |
| 48.38          | 1023             | 3630  |

| 2 $\theta$ (°) | Intencity (a.u.) |       |
|----------------|------------------|-------|
|                | Fe/S@CMIBWS      | MIBWS |
| 48.4           | 1037             | 3569  |
| 48.42          | 1006             | 3523  |
| 48.44          | 1027             | 3610  |
| 48.46          | 1077             | 3598  |
| 48.48          | 993              | 3575  |
| 48.5           | 1031             | 3567  |
| 48.52          | 931              | 3622  |
| 48.54          | 969              | 3550  |
| 48.56          | 969              | 3578  |
| 48.58          | 982              | 3593  |
| 48.6           | 999              | 3551  |
| 48.62          | 999              | 3580  |
| 48.64          | 1070             | 3573  |
| 48.66          | 994              | 3604  |
| 48.68          | 1034             | 3608  |
| 48.7           | 1066             | 3598  |
| 48.72          | 1017             | 3650  |
| 48.74          | 1038             | 3581  |
| 48.76          | 972              | 3634  |
| 48.78          | 973              | 3554  |
| 48.8           | 1040             | 3564  |
| 48.82          | 995              | 3629  |
| 48.84          | 1081             | 3636  |
| 48.86          | 1000             | 3631  |
| 48.88          | 973              | 3578  |
| 48.9           | 1020             | 3592  |
| 48.92          | 972              | 3601  |
| 48.94          | 1010             | 3616  |
| 48.96          | 1006             | 3597  |
| 48.98          | 981              | 3587  |
| 49             | 1006             | 3543  |
| 49.02          | 951              | 3542  |
| 49.04          | 1051             | 3564  |
| 49.06          | 1028             | 3609  |
| 49.08          | 968              | 3621  |
| 49.1           | 1042             | 3583  |
| 49.12          | 1053             | 3602  |
| 49.14          | 992              | 3577  |
| 49.16          | 996              | 3632  |
| 49.18          | 956              | 3598  |
| 49.2           | 996              | 3573  |
| 49.22          | 990              | 3569  |
| 49.24          | 1038             | 3597  |
| 49.26          | 1040             | 3625  |
| 49.28          | 996              | 3590  |
| 49.3           | 986              | 3548  |
| 49.32          | 1006             | 3583  |
| 49.34          | 1022             | 3555  |
| 49.36          | 1035             | 3569  |
| 49.38          | 1022             | 3598  |
| 49.4           | 992              | 3521  |
| 49.42          | 1007             | 3613  |
| 49.44          | 1015             | 3631  |
| 49.46          | 1019             | 3597  |
| 49.48          | 1075             | 3624  |
| 49.5           | 996              | 3644  |
| 49.52          | 1080             | 3562  |
| 49.54          | 1053             | 3617  |
| 49.56          | 967              | 3579  |
| 49.58          | 1042             | 3561  |
| 49.6           | 1008             | 3624  |
| 49.62          | 1056             | 3627  |

| 2 $\theta$ (°) | Intencity (a.u.) |       |
|----------------|------------------|-------|
|                | Fe/S@CMIBWS      | MIBWS |
| 49.64          | 1006             | 3628  |
| 49.66          | 1037             | 3554  |
| 49.68          | 1020             | 3556  |
| 49.7           | 1003             | 3639  |
| 49.72          | 1035             | 3514  |
| 49.74          | 1060             | 3655  |
| 49.76          | 1061             | 3547  |
| 49.78          | 1006             | 3542  |
| 49.8           | 1052             | 3580  |
| 49.82          | 996              | 3511  |
| 49.84          | 1052             | 3607  |
| 49.86          | 1005             | 3605  |
| 49.88          | 1002             | 3554  |
| 49.9           | 1076             | 3589  |
| 49.92          | 984              | 3619  |
| 49.94          | 970              | 3613  |
| 49.96          | 1011             | 3596  |
| 49.98          | 944              | 3567  |
| 50             | 985              | 3657  |
| 50.02          | 952              | 3545  |
| 50.04          | 981              | 3595  |
| 50.06          | 1000             | 3634  |
| 50.08          | 1042             | 3633  |
| 50.1           | 1011             | 3597  |
| 50.12          | 1015             | 3620  |
| 50.14          | 1035             | 3606  |
| 50.16          | 1027             | 3509  |
| 50.18          | 1075             | 3646  |
| 50.2           | 995              | 3632  |
| 50.22          | 1024             | 3675  |
| 50.24          | 1009             | 3636  |
| 50.26          | 1028             | 3586  |
| 50.28          | 999              | 3588  |
| 50.3           | 1046             | 3608  |
| 50.32          | 1019             | 3570  |
| 50.34          | 1048             | 3582  |
| 50.36          | 1019             | 3567  |
| 50.38          | 1002             | 3560  |
| 50.4           | 1022             | 3562  |
| 50.42          | 1043             | 3581  |
| 50.44          | 976              | 3572  |
| 50.46          | 1008             | 3557  |
| 50.48          | 1016             | 3519  |
| 50.5           | 963              | 3553  |
| 50.52          | 1007             | 3610  |
| 50.54          | 1031             | 3672  |
| 50.56          | 982              | 3614  |
| 50.58          | 897              | 3596  |
| 50.6           | 981              | 3535  |
| 50.62          | 1013             | 3607  |
| 50.64          | 987              | 3578  |
| 50.66          | 995              | 3597  |
| 50.68          | 970              | 3610  |
| 50.7           | 1025             | 3630  |
| 50.72          | 1030             | 3575  |
| 50.74          | 1029             | 3621  |
| 50.76          | 986              | 3615  |
| 50.78          | 1063             | 3630  |
| 50.8           | 1001             | 3545  |
| 50.82          | 1025             | 3614  |
| 50.84          | 992              | 3663  |
| 50.86          | 997              | 3586  |

| 2 $\theta$ (°) | Intencity (a.u.) |       |
|----------------|------------------|-------|
|                | Fe/S@CMIBWS      | MIBWS |
| 50.88          | 1003             | 3613  |
| 50.9           | 1051             | 3599  |
| 50.92          | 987              | 3611  |
| 50.94          | 956              | 3675  |
| 50.96          | 985              | 3577  |
| 50.98          | 1010             | 3582  |
| 51             | 1018             | 3580  |
| 51.02          | 966              | 3625  |
| 51.04          | 937              | 3624  |
| 51.06          | 917              | 3623  |
| 51.08          | 1009             | 3543  |
| 51.1           | 957              | 3569  |
| 51.12          | 975              | 3595  |
| 51.14          | 1028             | 3561  |
| 51.16          | 968              | 3656  |
| 51.18          | 982              | 3567  |
| 51.2           | 973              | 3555  |
| 51.22          | 998              | 3571  |
| 51.24          | 1013             | 3625  |
| 51.26          | 977              | 3589  |
| 51.28          | 936              | 3581  |
| 51.3           | 976              | 3591  |
| 51.32          | 981              | 3592  |
| 51.34          | 998              | 3607  |
| 51.36          | 970              | 3589  |
| 51.38          | 977              | 3599  |
| 51.4           | 964              | 3541  |
| 51.42          | 973              | 3564  |
| 51.44          | 1030             | 3576  |
| 51.46          | 1020             | 3596  |
| 51.48          | 994              | 3632  |
| 51.5           | 926              | 3591  |
| 51.52          | 928              | 3599  |
| 51.54          | 953              | 3651  |
| 51.56          | 936              | 3525  |
| 51.58          | 955              | 3573  |
| 51.6           | 995              | 3595  |
| 51.62          | 958              | 3601  |
| 51.64          | 973              | 3594  |
| 51.66          | 972              | 3639  |
| 51.68          | 929              | 3561  |
| 51.7           | 994              | 3609  |
| 51.72          | 971              | 3594  |
| 51.74          | 953              | 3606  |
| 51.76          | 953              | 3540  |
| 51.78          | 961              | 3583  |
| 51.8           | 981              | 3618  |
| 51.82          | 949              | 3668  |
| 51.84          | 916              | 3559  |
| 51.86          | 986              | 3626  |
| 51.88          | 987              | 3588  |
| 51.9           | 968              | 3594  |
| 51.92          | 955              | 3578  |
| 51.94          | 927              | 3574  |
| 51.96          | 957              | 3596  |
| 51.98          | 1002             | 3535  |
| 52             | 960              | 3589  |
| 52.02          | 1017             | 3614  |
| 52.04          | 983              | 3616  |
| 52.06          | 979              | 3568  |
| 52.08          | 897              | 3638  |
| 52.1           | 1003             | 3550  |

| 2 $\theta$ (°) | Intencity (a.u.) |       |
|----------------|------------------|-------|
|                | Fe/S@CMIBWS      | MIBWS |
| 52.12          | 979              | 3597  |
| 52.14          | 1022             | 3649  |
| 52.16          | 980              | 3565  |
| 52.18          | 948              | 3559  |
| 52.2           | 1013             | 3574  |
| 52.22          | 988              | 3621  |
| 52.24          | 950              | 3566  |
| 52.26          | 994              | 3591  |
| 52.28          | 932              | 3588  |
| 52.3           | 976              | 3606  |
| 52.32          | 939              | 3645  |
| 52.34          | 940              | 3592  |
| 52.36          | 956              | 3593  |
| 52.38          | 987              | 3577  |
| 52.4           | 958              | 3628  |
| 52.42          | 964              | 3631  |
| 52.44          | 1046             | 3606  |
| 52.46          | 999              | 3647  |
| 52.48          | 992              | 3611  |
| 52.5           | 964              | 3573  |
| 52.52          | 956              | 3600  |
| 52.54          | 979              | 3591  |
| 52.56          | 961              | 3625  |
| 52.58          | 977              | 3610  |
| 52.6           | 1043             | 3577  |
| 52.62          | 962              | 3642  |
| 52.64          | 981              | 3573  |
| 52.66          | 972              | 3598  |
| 52.68          | 984              | 3621  |
| 52.7           | 989              | 3562  |
| 52.72          | 963              | 3587  |
| 52.74          | 947              | 3604  |
| 52.76          | 972              | 3654  |
| 52.78          | 1033             | 3611  |
| 52.8           | 970              | 3596  |
| 52.82          | 948              | 3614  |
| 52.84          | 928              | 3659  |
| 52.86          | 934              | 3613  |
| 52.88          | 1020             | 3617  |
| 52.9           | 953              | 3663  |
| 52.92          | 946              | 3632  |
| 52.94          | 975              | 3617  |
| 52.96          | 908              | 3638  |
| 52.98          | 1050             | 3609  |
| 53             | 978              | 3581  |
| 53.02          | 1021             | 3677  |
| 53.04          | 1016             | 3655  |
| 53.06          | 985              | 3661  |
| 53.08          | 926              | 3698  |
| 53.1           | 999              | 3685  |
| 53.12          | 950              | 3610  |
| 53.14          | 1014             | 3662  |
| 53.16          | 1055             | 3680  |
| 53.18          | 1023             | 3704  |
| 53.2           | 922              | 3638  |
| 53.22          | 1022             | 3735  |
| 53.24          | 1003             | 3704  |
| 53.26          | 1014             | 3751  |
| 53.28          | 1010             | 3687  |
| 53.3           | 976              | 3667  |
| 53.32          | 1022             | 3621  |
| 53.34          | 1042             | 3729  |



| 2 $\theta$ (°) | Intencity (a.u.) |       |
|----------------|------------------|-------|
|                | Fe/S@CMIBWS      | MIBWS |
| 53.36          | 990              | 3771  |
| 53.38          | 1032             | 3796  |
| 53.4           | 1011             | 3712  |
| 53.42          | 984              | 3800  |
| 53.44          | 1036             | 3749  |
| 53.46          | 1014             | 3768  |
| 53.48          | 1000             | 3829  |
| 53.5           | 1014             | 3779  |
| 53.52          | 1082             | 3827  |
| 53.54          | 1059             | 3791  |
| 53.56          | 1069             | 3793  |
| 53.58          | 985              | 3744  |
| 53.6           | 1042             | 3798  |
| 53.62          | 992              | 3740  |
| 53.64          | 1074             | 3748  |
| 53.66          | 1027             | 3753  |
| 53.68          | 1016             | 3701  |
| 53.7           | 1063             | 3713  |
| 53.72          | 1051             | 3750  |
| 53.74          | 1027             | 3713  |
| 53.76          | 1043             | 3712  |
| 53.78          | 1017             | 3793  |
| 53.8           | 1019             | 3680  |
| 53.82          | 1003             | 3707  |
| 53.84          | 1015             | 3674  |
| 53.86          | 1040             | 3781  |
| 53.88          | 1003             | 3700  |
| 53.9           | 987              | 3646  |
| 53.92          | 946              | 3676  |
| 53.94          | 972              | 3685  |
| 53.96          | 985              | 3673  |
| 53.98          | 1028             | 3672  |
| 54             | 1033             | 3652  |
| 54.02          | 1057             | 3633  |
| 54.04          | 980              | 3633  |
| 54.06          | 1018             | 3636  |
| 54.08          | 1011             | 3584  |
| 54.1           | 984              | 3572  |
| 54.12          | 1000             | 3608  |
| 54.14          | 1008             | 3632  |
| 54.16          | 986              | 3682  |
| 54.18          | 979              | 3681  |
| 54.2           | 992              | 3654  |
| 54.22          | 1046             | 3606  |
| 54.24          | 1023             | 3621  |
| 54.26          | 1006             | 3610  |
| 54.28          | 962              | 3631  |
| 54.3           | 940              | 3645  |
| 54.32          | 1004             | 3656  |
| 54.34          | 962              | 3626  |
| 54.36          | 960              | 3615  |
| 54.38          | 917              | 3634  |
| 54.4           | 949              | 3663  |
| 54.42          | 946              | 3627  |
| 54.44          | 984              | 3619  |
| 54.46          | 992              | 3593  |
| 54.48          | 991              | 3621  |
| 54.5           | 992              | 3602  |
| 54.52          | 933              | 3649  |
| 54.54          | 975              | 3557  |
| 54.56          | 965              | 3626  |
| 54.58          | 977              | 3654  |

| 2 $\theta$ (°) | Intencity (a.u.) |       |
|----------------|------------------|-------|
|                | Fe/S@CMIBWS      | MIBWS |
| 54.6           | 987              | 3604  |
| 54.62          | 963              | 3625  |
| 54.64          | 948              | 3638  |
| 54.66          | 948              | 3574  |
| 54.68          | 989              | 3641  |
| 54.7           | 944              | 3621  |
| 54.72          | 960              | 3607  |
| 54.74          | 982              | 3660  |
| 54.76          | 946              | 3641  |
| 54.78          | 989              | 3673  |
| 54.8           | 917              | 3639  |
| 54.82          | 927              | 3633  |
| 54.84          | 940              | 3575  |
| 54.86          | 924              | 3605  |
| 54.88          | 967              | 3604  |
| 54.9           | 918              | 3622  |
| 54.92          | 924              | 3608  |
| 54.94          | 928              | 3617  |
| 54.96          | 1009             | 3658  |
| 54.98          | 970              | 3557  |
| 55             | 940              | 3653  |
| 55.02          | 978              | 3595  |
| 55.04          | 956              | 3587  |
| 55.06          | 940              | 3606  |
| 55.08          | 976              | 3599  |
| 55.1           | 920              | 3617  |
| 55.12          | 996              | 3652  |
| 55.14          | 946              | 3603  |
| 55.16          | 899              | 3624  |
| 55.18          | 991              | 3616  |
| 55.2           | 961              | 3587  |
| 55.22          | 884              | 3623  |
| 55.24          | 928              | 3638  |
| 55.26          | 940              | 3644  |
| 55.28          | 921              | 3618  |
| 55.3           | 946              | 3618  |
| 55.32          | 902              | 3591  |
| 55.34          | 936              | 3629  |
| 55.36          | 976              | 3651  |
| 55.38          | 928              | 3632  |
| 55.4           | 969              | 3583  |
| 55.42          | 1008             | 3604  |
| 55.44          | 941              | 3681  |
| 55.46          | 996              | 3644  |
| 55.48          | 992              | 3567  |
| 55.5           | 946              | 3617  |
| 55.52          | 949              | 3656  |
| 55.54          | 1044             | 3626  |
| 55.56          | 963              | 3625  |
| 55.58          | 983              | 3640  |
| 55.6           | 970              | 3643  |
| 55.62          | 946              | 3571  |
| 55.64          | 958              | 3652  |
| 55.66          | 956              | 3646  |
| 55.68          | 957              | 3626  |
| 55.7           | 916              | 3657  |
| 55.72          | 927              | 3625  |
| 55.74          | 964              | 3586  |
| 55.76          | 996              | 3654  |
| 55.78          | 937              | 3656  |
| 55.8           | 959              | 3640  |
| 55.82          | 981              | 3619  |

| 2 $\theta$ (°) | Intencity (a.u.) |       |
|----------------|------------------|-------|
|                | Fe/S@CMIBWS      | MIBWS |
| 55.84          | 915              | 3620  |
| 55.86          | 997              | 3673  |
| 55.88          | 954              | 3637  |
| 55.9           | 972              | 3608  |
| 55.92          | 953              | 3587  |
| 55.94          | 937              | 3572  |
| 55.96          | 938              | 3639  |
| 55.98          | 961              | 3581  |
| 56             | 940              | 3667  |
| 56.02          | 965              | 3641  |
| 56.04          | 948              | 3659  |
| 56.06          | 937              | 3659  |
| 56.08          | 982              | 3611  |
| 56.1           | 950              | 3709  |
| 56.12          | 946              | 3712  |
| 56.14          | 899              | 3653  |
| 56.16          | 954              | 3571  |
| 56.18          | 916              | 3637  |
| 56.2           | 1006             | 3639  |
| 56.22          | 968              | 3589  |
| 56.24          | 995              | 3620  |
| 56.26          | 946              | 3691  |
| 56.28          | 933              | 3618  |
| 56.3           | 969              | 3698  |
| 56.32          | 969              | 3703  |
| 56.34          | 962              | 3655  |
| 56.36          | 913              | 3632  |
| 56.38          | 982              | 3687  |
| 56.4           | 928              | 3727  |
| 56.42          | 963              | 3668  |
| 56.44          | 980              | 3641  |
| 56.46          | 948              | 3735  |
| 56.48          | 942              | 3752  |
| 56.5           | 979              | 3694  |
| 56.52          | 974              | 3700  |
| 56.54          | 977              | 3684  |
| 56.56          | 1021             | 3780  |
| 56.58          | 970              | 3736  |
| 56.6           | 934              | 3782  |
| 56.62          | 922              | 3777  |
| 56.64          | 936              | 3754  |
| 56.66          | 980              | 3740  |
| 56.68          | 954              | 3802  |
| 56.7           | 992              | 3787  |
| 56.72          | 970              | 3784  |
| 56.74          | 939              | 3810  |
| 56.76          | 922              | 3909  |
| 56.78          | 938              | 3952  |
| 56.8           | 990              | 3926  |
| 56.82          | 937              | 3906  |
| 56.84          | 999              | 4002  |
| 56.86          | 1009             | 4012  |
| 56.88          | 967              | 4096  |
| 56.9           | 1008             | 4087  |
| 56.92          | 1015             | 4135  |
| 56.94          | 1073             | 4081  |
| 56.96          | 1048             | 4201  |
| 56.98          | 1028             | 4191  |
| 57             | 1094             | 4195  |
| 57.02          | 1115             | 4225  |
| 57.04          | 1078             | 4155  |
| 57.06          | 1100             | 4205  |

| 2 $\theta$ (°) | Intencity (a.u.) |       |
|----------------|------------------|-------|
|                | Fe/S@CMIBWS      | MIBWS |
| 57.08          | 1158             | 4238  |
| 57.1           | 1140             | 4222  |
| 57.12          | 1180             | 4212  |
| 57.14          | 1114             | 4115  |
| 57.16          | 1168             | 4226  |
| 57.18          | 1165             | 4253  |
| 57.2           | 1151             | 4132  |
| 57.22          | 1117             | 4114  |
| 57.24          | 1149             | 4137  |
| 57.26          | 1107             | 4070  |
| 57.28          | 1163             | 4132  |
| 57.3           | 1216             | 4049  |
| 57.32          | 1116             | 4036  |
| 57.34          | 1128             | 3989  |
| 57.36          | 1107             | 3927  |
| 57.38          | 1128             | 3884  |
| 57.4           | 1109             | 3871  |
| 57.42          | 1097             | 3847  |
| 57.44          | 1046             | 3818  |
| 57.46          | 1107             | 3845  |
| 57.48          | 1115             | 3853  |
| 57.5           | 1076             | 3855  |
| 57.52          | 1059             | 3791  |
| 57.54          | 1039             | 3747  |
| 57.56          | 1062             | 3779  |
| 57.58          | 1122             | 3801  |
| 57.6           | 1085             | 3753  |
| 57.62          | 1013             | 3783  |
| 57.64          | 1004             | 3764  |
| 57.66          | 1002             | 3742  |
| 57.68          | 977              | 3683  |
| 57.7           | 1051             | 3744  |
| 57.72          | 1038             | 3715  |
| 57.74          | 990              | 3700  |
| 57.76          | 987              | 3682  |
| 57.78          | 1067             | 3717  |
| 57.8           | 1007             | 3589  |
| 57.82          | 987              | 3687  |
| 57.84          | 978              | 3698  |
| 57.86          | 968              | 3707  |
| 57.88          | 1010             | 3734  |
| 57.9           | 999              | 3721  |
| 57.92          | 946              | 3676  |
| 57.94          | 996              | 3720  |
| 57.96          | 967              | 3723  |
| 57.98          | 959              | 3632  |
| 58             | 931              | 3640  |
| 58.02          | 976              | 3640  |
| 58.04          | 938              | 3716  |
| 58.06          | 982              | 3615  |
| 58.08          | 965              | 3610  |
| 58.1           | 908              | 3629  |
| 58.12          | 1011             | 3579  |
| 58.14          | 947              | 3596  |
| 58.16          | 977              | 3672  |
| 58.18          | 948              | 3588  |
| 58.2           | 924              | 3672  |
| 58.22          | 950              | 3596  |
| 58.24          | 981              | 3701  |
| 58.26          | 919              | 3643  |
| 58.28          | 932              | 3604  |
| 58.3           | 927              | 3585  |

| 2 $\theta$ (°) | Intencity (a.u.) |       |
|----------------|------------------|-------|
|                | Fe/S@CMIBWS      | MIBWS |
| 58.32          | 929              | 3645  |
| 58.34          | 936              | 3651  |
| 58.36          | 914              | 3619  |
| 58.38          | 948              | 3625  |
| 58.4           | 954              | 3586  |
| 58.42          | 916              | 3608  |
| 58.44          | 882              | 3613  |
| 58.46          | 885              | 3614  |
| 58.48          | 844              | 3608  |
| 58.5           | 957              | 3634  |
| 58.52          | 982              | 3631  |
| 58.54          | 847              | 3645  |
| 58.56          | 950              | 3624  |
| 58.58          | 851              | 3615  |
| 58.6           | 921              | 3631  |
| 58.62          | 885              | 3610  |
| 58.64          | 925              | 3632  |
| 58.66          | 926              | 3647  |
| 58.68          | 951              | 3583  |
| 58.7           | 945              | 3647  |
| 58.72          | 910              | 3628  |
| 58.74          | 936              | 3582  |
| 58.76          | 954              | 3634  |
| 58.78          | 947              | 3594  |
| 58.8           | 944              | 3633  |
| 58.82          | 948              | 3621  |
| 58.84          | 914              | 3638  |
| 58.86          | 972              | 3641  |
| 58.88          | 905              | 3593  |
| 58.9           | 958              | 3608  |
| 58.92          | 903              | 3582  |
| 58.94          | 970              | 3589  |
| 58.96          | 938              | 3569  |
| 58.98          | 946              | 3594  |
| 59             | 881              | 3590  |
| 59.02          | 980              | 3573  |
| 59.04          | 934              | 3615  |
| 59.06          | 958              | 3569  |
| 59.08          | 958              | 3587  |
| 59.1           | 965              | 3629  |
| 59.12          | 995              | 3687  |
| 59.14          | 916              | 3631  |
| 59.16          | 942              | 3590  |
| 59.18          | 900              | 3576  |
| 59.2           | 952              | 3632  |
| 59.22          | 964              | 3656  |
| 59.24          | 970              | 3633  |
| 59.26          | 944              | 3543  |
| 59.28          | 918              | 3650  |
| 59.3           | 957              | 3567  |
| 59.32          | 925              | 3565  |
| 59.34          | 986              | 3583  |
| 59.36          | 971              | 3672  |
| 59.38          | 936              | 3580  |
| 59.4           | 966              | 3688  |
| 59.42          | 963              | 3573  |
| 59.44          | 978              | 3575  |
| 59.46          | 960              | 3622  |
| 59.48          | 940              | 3540  |
| 59.5           | 860              | 3633  |
| 59.52          | 939              | 3609  |
| 59.54          | 905              | 3665  |

| 2 $\theta$ (°) | Intencity (a.u.) |       |
|----------------|------------------|-------|
|                | Fe/S@CMIBWS      | MIBWS |
| 59.56          | 911              | 3548  |
| 59.58          | 924              | 3585  |
| 59.6           | 980              | 3590  |
| 59.62          | 995              | 3543  |
| 59.64          | 971              | 3608  |
| 59.66          | 917              | 3579  |
| 59.68          | 938              | 3623  |
| 59.7           | 911              | 3581  |
| 59.72          | 937              | 3501  |
| 59.74          | 974              | 3604  |
| 59.76          | 1000             | 3593  |
| 59.78          | 930              | 3560  |
| 59.8           | 962              | 3565  |
| 59.82          | 911              | 3601  |
| 59.84          | 882              | 3612  |
| 59.86          | 894              | 3661  |
| 59.88          | 911              | 3651  |
| 59.9           | 898              | 3621  |
| 59.92          | 898              | 3649  |
| 59.94          | 883              | 3646  |
| 59.96          | 958              | 3631  |
| 59.98          | 968              | 3543  |
| 60             | 899              | 3634  |
| 60.02          | 951              | 3661  |
| 60.04          | 979              | 3599  |
| 60.06          | 926              | 3583  |
| 60.08          | 932              | 3603  |
| 60.1           | 935              | 3562  |
| 60.12          | 986              | 3644  |
| 60.14          | 971              | 3597  |
| 60.16          | 886              | 3627  |
| 60.18          | 946              | 3626  |
| 60.2           | 956              | 3631  |
| 60.22          | 890              | 3530  |
| 60.24          | 913              | 3611  |
| 60.26          | 989              | 3634  |
| 60.28          | 1001             | 3641  |
| 60.3           | 930              | 3624  |
| 60.32          | 924              | 3592  |
| 60.34          | 942              | 3652  |
| 60.36          | 900              | 3557  |
| 60.38          | 932              | 3587  |
| 60.4           | 937              | 3604  |
| 60.42          | 978              | 3676  |
| 60.44          | 983              | 3598  |
| 60.46          | 939              | 3605  |
| 60.48          | 961              | 3591  |
| 60.5           | 884              | 3652  |
| 60.52          | 976              | 3607  |
| 60.54          | 954              | 3623  |
| 60.56          | 939              | 3571  |
| 60.58          | 868              | 3568  |
| 60.6           | 899              | 3594  |
| 60.62          | 880              | 3638  |
| 60.64          | 923              | 3698  |
| 60.66          | 934              | 3600  |
| 60.68          | 926              | 3582  |
| 60.7           | 938              | 3664  |
| 60.72          | 972              | 3604  |
| 60.74          | 948              | 3569  |
| 60.76          | 904              | 3591  |
| 60.78          | 949              | 3574  |

| 2 $\theta$ (°) | Intencity (a.u.) |       |
|----------------|------------------|-------|
|                | Fe/S@CMIBWS      | MIBWS |
| 60.8           | 903              | 3631  |
| 60.82          | 890              | 3640  |
| 60.84          | 953              | 3622  |
| 60.86          | 910              | 3648  |
| 60.88          | 866              | 3651  |
| 60.9           | 957              | 3618  |
| 60.92          | 979              | 3694  |
| 60.94          | 954              | 3666  |
| 60.96          | 917              | 3646  |
| 60.98          | 887              | 3638  |
| 61             | 907              | 3676  |
| 61.02          | 969              | 3613  |
| 61.04          | 937              | 3591  |
| 61.06          | 935              | 3613  |
| 61.08          | 922              | 3624  |
| 61.1           | 947              | 3583  |
| 61.12          | 977              | 3608  |
| 61.14          | 897              | 3611  |
| 61.16          | 903              | 3645  |
| 61.18          | 960              | 3625  |
| 61.2           | 946              | 3638  |
| 61.22          | 891              | 3642  |
| 61.24          | 921              | 3630  |
| 61.26          | 934              | 3630  |
| 61.28          | 932              | 3645  |
| 61.3           | 899              | 3671  |
| 61.32          | 963              | 3619  |
| 61.34          | 993              | 3583  |
| 61.36          | 1037             | 3621  |
| 61.38          | 954              | 3616  |
| 61.4           | 932              | 3645  |
| 61.42          | 958              | 3644  |
| 61.44          | 978              | 3630  |
| 61.46          | 953              | 3671  |
| 61.48          | 952              | 3620  |
| 61.5           | 942              | 3652  |
| 61.52          | 988              | 3616  |
| 61.54          | 981              | 3632  |
| 61.56          | 957              | 3653  |
| 61.58          | 983              | 3633  |
| 61.6           | 946              | 3634  |
| 61.62          | 922              | 3714  |
| 61.64          | 995              | 3666  |
| 61.66          | 909              | 3617  |
| 61.68          | 959              | 3630  |
| 61.7           | 972              | 3700  |
| 61.72          | 961              | 3637  |
| 61.74          | 960              | 3690  |
| 61.76          | 970              | 3663  |
| 61.78          | 906              | 3645  |
| 61.8           | 935              | 3676  |
| 61.82          | 948              | 3736  |
| 61.84          | 897              | 3604  |
| 61.86          | 963              | 3695  |
| 61.88          | 925              | 3667  |
| 61.9           | 1002             | 3693  |
| 61.92          | 920              | 3684  |
| 61.94          | 955              | 3704  |
| 61.96          | 959              | 3664  |
| 61.98          | 972              | 3712  |
| 62             | 987              | 3708  |
| 62.02          | 981              | 3606  |

| 2 $\theta$ (°) | Intencity (a.u.) |       |
|----------------|------------------|-------|
|                | Fe/S@CMIBWS      | MIBWS |
| 62.04          | 877              | 3725  |
| 62.06          | 980              | 3713  |
| 62.08          | 920              | 3770  |
| 62.1           | 981              | 3760  |
| 62.12          | 928              | 3781  |
| 62.14          | 932              | 3766  |
| 62.16          | 996              | 3753  |
| 62.18          | 915              | 3794  |
| 62.2           | 957              | 3788  |
| 62.22          | 980              | 3830  |
| 62.24          | 1011             | 3801  |
| 62.26          | 990              | 3826  |
| 62.28          | 991              | 3910  |
| 62.3           | 969              | 3875  |
| 62.32          | 973              | 3911  |
| 62.34          | 998              | 3982  |
| 62.36          | 965              | 3994  |
| 62.38          | 991              | 4080  |
| 62.4           | 996              | 4064  |
| 62.42          | 993              | 4113  |
| 62.44          | 975              | 4227  |
| 62.46          | 1021             | 4244  |
| 62.48          | 978              | 4383  |
| 62.5           | 1054             | 4415  |
| 62.52          | 1064             | 4329  |
| 62.54          | 1102             | 4461  |
| 62.56          | 1061             | 4498  |
| 62.58          | 1085             | 4533  |
| 62.6           | 1095             | 4468  |
| 62.62          | 1128             | 4664  |
| 62.64          | 1189             | 4668  |
| 62.66          | 1123             | 4678  |
| 62.68          | 1193             | 4609  |
| 62.7           | 1160             | 4604  |
| 62.72          | 1209             | 4597  |
| 62.74          | 1254             | 4593  |
| 62.76          | 1172             | 4603  |
| 62.78          | 1226             | 4582  |
| 62.8           | 1187             | 4576  |
| 62.82          | 1174             | 4410  |
| 62.84          | 1212             | 4470  |
| 62.86          | 1212             | 4354  |
| 62.88          | 1197             | 4422  |
| 62.9           | 1201             | 4331  |
| 62.92          | 1184             | 4201  |
| 62.94          | 1146             | 4205  |
| 62.96          | 1192             | 4162  |
| 62.98          | 1162             | 4134  |
| 63             | 1113             | 4154  |
| 63.02          | 1118             | 4020  |
| 63.04          | 1112             | 4048  |
| 63.06          | 1131             | 4027  |
| 63.08          | 1140             | 3998  |
| 63.1           | 1150             | 3905  |
| 63.12          | 1071             | 3935  |
| 63.14          | 1091             | 3922  |
| 63.16          | 1096             | 3894  |
| 63.18          | 1108             | 3891  |
| 63.2           | 1031             | 3841  |
| 63.22          | 1019             | 3788  |
| 63.24          | 1017             | 3793  |
| 63.26          | 1043             | 3808  |



| 2 $\theta$ (°) | Intencity (a.u.) |       |
|----------------|------------------|-------|
|                | Fe/S@CMIBWS      | MIBWS |
| 63.28          | 982              | 3759  |
| 63.3           | 1049             | 3748  |
| 63.32          | 987              | 3720  |
| 63.34          | 970              | 3802  |
| 63.36          | 997              | 3741  |
| 63.38          | 1000             | 3703  |
| 63.4           | 994              | 3704  |
| 63.42          | 916              | 3760  |
| 63.44          | 964              | 3705  |
| 63.46          | 999              | 3656  |
| 63.48          | 965              | 3684  |
| 63.5           | 931              | 3750  |
| 63.52          | 945              | 3741  |
| 63.54          | 926              | 3708  |
| 63.56          | 956              | 3609  |
| 63.58          | 958              | 3688  |
| 63.6           | 934              | 3696  |
| 63.62          | 919              | 3727  |
| 63.64          | 924              | 3650  |
| 63.66          | 944              | 3687  |
| 63.68          | 1015             | 3628  |
| 63.7           | 966              | 3654  |
| 63.72          | 920              | 3633  |
| 63.74          | 888              | 3663  |
| 63.76          | 942              | 3645  |
| 63.78          | 886              | 3642  |
| 63.8           | 908              | 3624  |
| 63.82          | 937              | 3675  |
| 63.84          | 937              | 3637  |
| 63.86          | 886              | 3651  |
| 63.88          | 927              | 3600  |
| 63.9           | 954              | 3633  |
| 63.92          | 926              | 3634  |
| 63.94          | 935              | 3630  |
| 63.96          | 888              | 3651  |
| 63.98          | 893              | 3678  |
| 64             | 870              | 3645  |
| 64.02          | 897              | 3618  |
| 64.04          | 871              | 3602  |
| 64.06          | 963              | 3656  |
| 64.08          | 907              | 3636  |
| 64.1           | 937              | 3606  |
| 64.12          | 923              | 3626  |
| 64.14          | 891              | 3603  |
| 64.16          | 983              | 3539  |
| 64.18          | 912              | 3629  |
| 64.2           | 861              | 3553  |
| 64.22          | 923              | 3555  |
| 64.24          | 884              | 3606  |
| 64.26          | 866              | 3566  |
| 64.28          | 896              | 3628  |
| 64.3           | 919              | 3663  |
| 64.32          | 887              | 3675  |
| 64.34          | 910              | 3693  |
| 64.36          | 875              | 3565  |
| 64.38          | 905              | 3642  |
| 64.4           | 917              | 3659  |
| 64.42          | 927              | 3606  |
| 64.44          | 863              | 3631  |
| 64.46          | 866              | 3611  |
| 64.48          | 896              | 3575  |
| 64.5           | 916              | 3649  |

| 2 $\theta$ (°) | Intencity (a.u.) |       |
|----------------|------------------|-------|
|                | Fe/S@CMIBWS      | MIBWS |
| 64.52          | 877              | 3612  |
| 64.54          | 909              | 3629  |
| 64.56          | 936              | 3571  |
| 64.58          | 878              | 3672  |
| 64.6           | 891              | 3602  |
| 64.62          | 883              | 3557  |
| 64.64          | 914              | 3618  |
| 64.66          | 803              | 3555  |
| 64.68          | 904              | 3577  |
| 64.7           | 892              | 3650  |
| 64.72          | 885              | 3622  |
| 64.74          | 862              | 3598  |
| 64.76          | 905              | 3573  |
| 64.78          | 907              | 3596  |
| 64.8           | 907              | 3619  |
| 64.82          | 887              | 3601  |
| 64.84          | 886              | 3562  |
| 64.86          | 880              | 3569  |
| 64.88          | 892              | 3611  |
| 64.9           | 899              | 3579  |
| 64.92          | 949              | 3556  |
| 64.94          | 888              | 3611  |
| 64.96          | 899              | 3622  |
| 64.98          | 905              | 3634  |
| 65             | 901              | 3604  |
| 65.02          | 891              | 3572  |
| 65.04          | 904              | 3530  |
| 65.06          | 857              | 3580  |
| 65.08          | 821              | 3545  |
| 65.1           | 904              | 3610  |
| 65.12          | 874              | 3568  |
| 65.14          | 835              | 3512  |
| 65.16          | 896              | 3618  |
| 65.18          | 900              | 3619  |
| 65.2           | 860              | 3604  |
| 65.22          | 888              | 3612  |
| 65.24          | 890              | 3612  |
| 65.26          | 913              | 3580  |
| 65.28          | 835              | 3582  |
| 65.3           | 872              | 3545  |
| 65.32          | 833              | 3532  |
| 65.34          | 919              | 3583  |
| 65.36          | 841              | 3562  |
| 65.38          | 871              | 3601  |
| 65.4           | 856              | 3588  |
| 65.42          | 811              | 3570  |
| 65.44          | 861              | 3604  |
| 65.46          | 881              | 3613  |
| 65.48          | 874              | 3628  |
| 65.5           | 901              | 3628  |
| 65.52          | 867              | 3582  |
| 65.54          | 864              | 3601  |
| 65.56          | 877              | 3605  |
| 65.58          | 839              | 3554  |
| 65.6           | 825              | 3584  |
| 65.62          | 889              | 3551  |
| 65.64          | 880              | 3618  |
| 65.66          | 846              | 3611  |
| 65.68          | 883              | 3609  |
| 65.7           | 903              | 3648  |
| 65.72          | 878              | 3543  |
| 65.74          | 916              | 3647  |

| 2 $\theta$ (°) | Intencity (a.u.) |       |
|----------------|------------------|-------|
|                | Fe/S@CMIBWS      | MIBWS |
| 65.76          | 941              | 3563  |
| 65.78          | 867              | 3629  |
| 65.8           | 926              | 3612  |
| 65.82          | 877              | 3612  |
| 65.84          | 891              | 3622  |
| 65.86          | 851              | 3624  |
| 65.88          | 853              | 3617  |
| 65.9           | 886              | 3597  |
| 65.92          | 894              | 3621  |
| 65.94          | 839              | 3584  |
| 65.96          | 821              | 3626  |
| 65.98          | 825              | 3632  |
| 66             | 872              | 3596  |
| 66.02          | 845              | 3593  |
| 66.04          | 883              | 3591  |
| 66.06          | 861              | 3643  |
| 66.08          | 919              | 3668  |
| 66.1           | 841              | 3642  |
| 66.12          | 860              | 3522  |
| 66.14          | 832              | 3614  |
| 66.16          | 868              | 3575  |
| 66.18          | 879              | 3577  |
| 66.2           | 838              | 3621  |
| 66.22          | 829              | 3623  |
| 66.24          | 790              | 3599  |
| 66.26          | 877              | 3642  |
| 66.28          | 862              | 3652  |
| 66.3           | 874              | 3625  |
| 66.32          | 919              | 3586  |
| 66.34          | 890              | 3529  |
| 66.36          | 874              | 3543  |
| 66.38          | 903              | 3602  |
| 66.4           | 865              | 3578  |
| 66.42          | 883              | 3632  |
| 66.44          | 903              | 3597  |
| 66.46          | 889              | 3634  |
| 66.48          | 835              | 3551  |
| 66.5           | 879              | 3576  |
| 66.52          | 846              | 3628  |
| 66.54          | 876              | 3530  |
| 66.56          | 861              | 3588  |
| 66.58          | 874              | 3629  |
| 66.6           | 844              | 3621  |
| 66.62          | 882              | 3548  |
| 66.64          | 818              | 3641  |
| 66.66          | 855              | 3570  |
| 66.68          | 879              | 3617  |
| 66.7           | 892              | 3600  |
| 66.72          | 925              | 3544  |
| 66.74          | 885              | 3551  |
| 66.76          | 852              | 3622  |
| 66.78          | 851              | 3638  |
| 66.8           | 877              | 3605  |
| 66.82          | 920              | 3554  |
| 66.84          | 876              | 3570  |
| 66.86          | 872              | 3602  |
| 66.88          | 874              | 3607  |
| 66.9           | 860              | 3585  |
| 66.92          | 849              | 3560  |
| 66.94          | 900              | 3580  |
| 66.96          | 925              | 3559  |
| 66.98          | 832              | 3632  |

| 2 $\theta$ (°) | Intencity (a.u.) |       |
|----------------|------------------|-------|
|                | Fe/S@CMIBWS      | MIBWS |
| 67             | 841              | 3554  |
| 67.02          | 886              | 3592  |
| 67.04          | 880              | 3602  |
| 67.06          | 842              | 3570  |
| 67.08          | 829              | 3606  |
| 67.1           | 864              | 3526  |
| 67.12          | 864              | 3625  |
| 67.14          | 854              | 3583  |
| 67.16          | 791              | 3570  |
| 67.18          | 862              | 3604  |
| 67.2           | 835              | 3630  |
| 67.22          | 857              | 3542  |
| 67.24          | 830              | 3587  |
| 67.26          | 828              | 3632  |
| 67.28          | 870              | 3619  |
| 67.3           | 869              | 3554  |
| 67.32          | 901              | 3550  |
| 67.34          | 845              | 3596  |
| 67.36          | 855              | 3584  |
| 67.38          | 865              | 3493  |
| 67.4           | 854              | 3662  |
| 67.42          | 899              | 3591  |
| 67.44          | 881              | 3572  |
| 67.46          | 865              | 3596  |
| 67.48          | 860              | 3629  |
| 67.5           | 879              | 3610  |
| 67.52          | 888              | 3604  |
| 67.54          | 834              | 3544  |
| 67.56          | 824              | 3540  |
| 67.58          | 839              | 3618  |
| 67.6           | 850              | 3575  |
| 67.62          | 791              | 3612  |
| 67.64          | 917              | 3619  |
| 67.66          | 870              | 3624  |
| 67.68          | 870              | 3568  |
| 67.7           | 873              | 3561  |
| 67.72          | 902              | 3643  |
| 67.74          | 870              | 3576  |
| 67.76          | 826              | 3588  |
| 67.78          | 838              | 3612  |
| 67.8           | 914              | 3582  |
| 67.82          | 885              | 3610  |
| 67.84          | 859              | 3600  |
| 67.86          | 847              | 3664  |
| 67.88          | 869              | 3585  |
| 67.9           | 889              | 3560  |
| 67.92          | 835              | 3591  |
| 67.94          | 875              | 3585  |
| 67.96          | 827              | 3566  |
| 67.98          | 864              | 3554  |
| 68             | 862              | 3571  |
| 68.02          | 821              | 3621  |
| 68.04          | 865              | 3597  |
| 68.06          | 876              | 3623  |
| 68.08          | 844              | 3642  |
| 68.1           | 859              | 3653  |
| 68.12          | 826              | 3571  |
| 68.14          | 855              | 3576  |
| 68.16          | 837              | 3586  |
| 68.18          | 886              | 3594  |
| 68.2           | 859              | 3575  |
| 68.22          | 865              | 3613  |

| 2 $\theta$ (°) | Intencity (a.u.) |       |
|----------------|------------------|-------|
|                | Fe/S@CMIBWS      | MIBWS |
| 68.24          | 857              | 3657  |
| 68.26          | 864              | 3597  |
| 68.28          | 916              | 3605  |
| 68.3           | 852              | 3609  |
| 68.32          | 863              | 3565  |
| 68.34          | 844              | 3604  |
| 68.36          | 885              | 3585  |
| 68.38          | 925              | 3593  |
| 68.4           | 891              | 3583  |
| 68.42          | 918              | 3587  |
| 68.44          | 836              | 3583  |
| 68.46          | 831              | 3599  |
| 68.48          | 850              | 3614  |
| 68.5           | 870              | 3599  |
| 68.52          | 808              | 3618  |
| 68.54          | 822              | 3581  |
| 68.56          | 833              | 3637  |
| 68.58          | 846              | 3569  |
| 68.6           | 858              | 3538  |
| 68.62          | 846              | 3630  |
| 68.64          | 858              | 3609  |
| 68.66          | 839              | 3592  |
| 68.68          | 849              | 3578  |
| 68.7           | 833              | 3590  |
| 68.72          | 874              | 3620  |
| 68.74          | 822              | 3563  |
| 68.76          | 836              | 3565  |
| 68.78          | 795              | 3623  |
| 68.8           | 860              | 3619  |
| 68.82          | 882              | 3549  |
| 68.84          | 839              | 3568  |
| 68.86          | 819              | 3624  |
| 68.88          | 878              | 3609  |
| 68.9           | 889              | 3538  |
| 68.92          | 892              | 3619  |
| 68.94          | 857              | 3593  |
| 68.96          | 830              | 3612  |
| 68.98          | 784              | 3578  |
| 69             | 915              | 3585  |
| 69.02          | 869              | 3591  |
| 69.04          | 892              | 3529  |
| 69.06          | 847              | 3612  |
| 69.08          | 858              | 3633  |
| 69.1           | 819              | 3563  |
| 69.12          | 861              | 3649  |
| 69.14          | 844              | 3576  |
| 69.16          | 889              | 3586  |
| 69.18          | 853              | 3599  |
| 69.2           | 888              | 3583  |
| 69.22          | 856              | 3594  |
| 69.24          | 852              | 3554  |
| 69.26          | 870              | 3573  |
| 69.28          | 852              | 3640  |
| 69.3           | 803              | 3569  |
| 69.32          | 845              | 3571  |
| 69.34          | 839              | 3597  |
| 69.36          | 838              | 3569  |
| 69.38          | 820              | 3628  |
| 69.4           | 833              | 3533  |
| 69.42          | 904              | 3607  |
| 69.44          | 838              | 3563  |
| 69.46          | 813              | 3609  |

| 2 $\theta$ (°) | Intencity (a.u.) |       |
|----------------|------------------|-------|
|                | Fe/S@CMIBWS      | MIBWS |
| 69.48          | 880              | 3608  |
| 69.5           | 876              | 3649  |
| 69.52          | 836              | 3600  |
| 69.54          | 829              | 3600  |
| 69.56          | 849              | 3608  |
| 69.58          | 805              | 3642  |
| 69.6           | 842              | 3555  |
| 69.62          | 825              | 3599  |
| 69.64          | 839              | 3633  |
| 69.66          | 847              | 3574  |
| 69.68          | 863              | 3648  |
| 69.7           | 871              | 3611  |
| 69.72          | 829              | 3611  |
| 69.74          | 860              | 3540  |
| 69.76          | 852              | 3603  |
| 69.78          | 899              | 3666  |
| 69.8           | 816              | 3624  |
| 69.82          | 833              | 3538  |
| 69.84          | 895              | 3564  |
| 69.86          | 807              | 3577  |
| 69.88          | 810              | 3579  |
| 69.9           | 858              | 3636  |
| 69.92          | 912              | 3561  |
| 69.94          | 803              | 3675  |
| 69.96          | 856              | 3598  |
| 69.98          | 817              | 3651  |
| 70             | 846              | 3650  |
| 70.02          | 851              | 3609  |
| 70.04          | 907              | 3531  |
| 70.06          | 838              | 3601  |
| 70.08          | 868              | 3634  |
| 70.1           | 829              | 3571  |
| 70.12          | 830              | 3615  |
| 70.14          | 838              | 3652  |
| 70.16          | 882              | 3537  |
| 70.18          | 844              | 3576  |
| 70.2           | 863              | 3568  |
| 70.22          | 842              | 3566  |
| 70.24          | 875              | 3548  |
| 70.26          | 801              | 3603  |
| 70.28          | 823              | 3509  |
| 70.3           | 846              | 3592  |
| 70.32          | 868              | 3564  |
| 70.34          | 863              | 3537  |
| 70.36          | 845              | 3562  |
| 70.38          | 782              | 3571  |
| 70.4           | 817              | 3599  |
| 70.42          | 833              | 3565  |
| 70.44          | 842              | 3592  |
| 70.46          | 860              | 3553  |
| 70.48          | 873              | 3620  |
| 70.5           | 842              | 3614  |
| 70.52          | 802              | 3560  |
| 70.54          | 816              | 3633  |
| 70.56          | 843              | 3604  |
| 70.58          | 855              | 3574  |
| 70.6           | 825              | 3661  |
| 70.62          | 842              | 3592  |
| 70.64          | 831              | 3621  |
| 70.66          | 805              | 3637  |
| 70.68          | 872              | 3630  |
| 70.7           | 775              | 3595  |

| 2 $\theta$ (°) | Intencity (a.u.) |       |
|----------------|------------------|-------|
|                | Fe/S@CMIBWS      | MIBWS |
| 70.72          | 863              | 3668  |
| 70.74          | 885              | 3675  |
| 70.76          | 855              | 3629  |
| 70.78          | 815              | 3600  |
| 70.8           | 816              | 3617  |
| 70.82          | 857              | 3639  |
| 70.84          | 862              | 3600  |
| 70.86          | 904              | 3644  |
| 70.88          | 862              | 3655  |
| 70.9           | 856              | 3595  |
| 70.92          | 826              | 3577  |
| 70.94          | 836              | 3618  |
| 70.96          | 841              | 3611  |
| 70.98          | 858              | 3680  |
| 71             | 810              | 3626  |
| 71.02          | 799              | 3672  |
| 71.04          | 830              | 3575  |
| 71.06          | 820              | 3686  |
| 71.08          | 859              | 3601  |
| 71.1           | 842              | 3613  |
| 71.12          | 842              | 3665  |
| 71.14          | 863              | 3634  |
| 71.16          | 847              | 3651  |
| 71.18          | 825              | 3660  |
| 71.2           | 820              | 3662  |
| 71.22          | 843              | 3629  |
| 71.24          | 815              | 3655  |
| 71.26          | 870              | 3591  |
| 71.28          | 864              | 3598  |
| 71.3           | 820              | 3681  |
| 71.32          | 862              | 3625  |
| 71.34          | 867              | 3614  |
| 71.36          | 892              | 3654  |
| 71.38          | 809              | 3624  |
| 71.4           | 865              | 3621  |
| 71.42          | 863              | 3584  |
| 71.44          | 864              | 3625  |
| 71.46          | 894              | 3625  |
| 71.48          | 866              | 3655  |
| 71.5           | 872              | 3593  |
| 71.52          | 816              | 3642  |
| 71.54          | 854              | 3595  |
| 71.56          | 859              | 3609  |
| 71.58          | 802              | 3600  |
| 71.6           | 852              | 3548  |
| 71.62          | 874              | 3600  |
| 71.64          | 847              | 3630  |
| 71.66          | 846              | 3566  |
| 71.68          | 851              | 3608  |
| 71.7           | 904              | 3614  |
| 71.72          | 811              | 3668  |
| 71.74          | 803              | 3610  |
| 71.76          | 883              | 3652  |
| 71.78          | 874              | 3614  |
| 71.8           | 839              | 3594  |
| 71.82          | 880              | 3619  |
| 71.84          | 790              | 3595  |
| 71.86          | 810              | 3514  |
| 71.88          | 830              | 3588  |
| 71.9           | 844              | 3595  |
| 71.92          | 857              | 3556  |
| 71.94          | 876              | 3608  |

| 2 $\theta$ (°) | Intencity (a.u.) |       |
|----------------|------------------|-------|
|                | Fe/S@CMIBWS      | MIBWS |
| 71.96          | 845              | 3565  |
| 71.98          | 828              | 3608  |
| 72             | 832              | 3642  |
| 72.02          | 816              | 3582  |
| 72.04          | 867              | 3595  |
| 72.06          | 813              | 3555  |
| 72.08          | 860              | 3611  |
| 72.1           | 880              | 3585  |
| 72.12          | 872              | 3552  |
| 72.14          | 809              | 3646  |
| 72.16          | 854              | 3628  |
| 72.18          | 845              | 3600  |
| 72.2           | 834              | 3533  |
| 72.22          | 831              | 3591  |
| 72.24          | 890              | 3599  |
| 72.26          | 832              | 3597  |
| 72.28          | 836              | 3585  |
| 72.3           | 794              | 3592  |
| 72.32          | 791              | 3583  |
| 72.34          | 890              | 3627  |
| 72.36          | 837              | 3625  |
| 72.38          | 877              | 3608  |
| 72.4           | 896              | 3608  |
| 72.42          | 823              | 3645  |
| 72.44          | 792              | 3675  |
| 72.46          | 856              | 3587  |
| 72.48          | 850              | 3592  |
| 72.5           | 835              | 3589  |
| 72.52          | 849              | 3553  |
| 72.54          | 841              | 3541  |
| 72.56          | 839              | 3522  |
| 72.58          | 846              | 3608  |
| 72.6           | 814              | 3591  |
| 72.62          | 828              | 3615  |
| 72.64          | 830              | 3593  |
| 72.66          | 875              | 3627  |
| 72.68          | 860              | 3595  |
| 72.7           | 850              | 3638  |
| 72.72          | 813              | 3591  |
| 72.74          | 793              | 3553  |
| 72.76          | 822              | 3586  |
| 72.78          | 853              | 3577  |
| 72.8           | 844              | 3631  |
| 72.82          | 859              | 3640  |
| 72.84          | 844              | 3576  |
| 72.86          | 827              | 3597  |
| 72.88          | 866              | 3586  |
| 72.9           | 795              | 3535  |
| 72.92          | 862              | 3637  |
| 72.94          | 859              | 3554  |
| 72.96          | 848              | 3607  |
| 72.98          | 833              | 3555  |
| 73             | 828              | 3579  |
| 73.02          | 826              | 3604  |
| 73.04          | 832              | 3615  |
| 73.06          | 893              | 3610  |
| 73.08          | 840              | 3625  |
| 73.1           | 848              | 3574  |
| 73.12          | 853              | 3582  |
| 73.14          | 867              | 3596  |
| 73.16          | 862              | 3619  |
| 73.18          | 859              | 3606  |



| 2 $\theta$ (°) | Intencity (a.u.) |       |
|----------------|------------------|-------|
|                | Fe/S@CMIBWS      | MIBWS |
| 73.2           | 825              | 3592  |
| 73.22          | 875              | 3614  |
| 73.24          | 811              | 3540  |
| 73.26          | 859              | 3602  |
| 73.28          | 842              | 3582  |
| 73.3           | 876              | 3576  |
| 73.32          | 901              | 3583  |
| 73.34          | 889              | 3634  |
| 73.36          | 872              | 3603  |
| 73.38          | 880              | 3636  |
| 73.4           | 944              | 3650  |
| 73.42          | 809              | 3640  |
| 73.44          | 849              | 3581  |
| 73.46          | 900              | 3664  |
| 73.48          | 849              | 3615  |
| 73.5           | 878              | 3621  |
| 73.52          | 852              | 3631  |
| 73.54          | 816              | 3629  |
| 73.56          | 898              | 3631  |
| 73.58          | 821              | 3635  |
| 73.6           | 851              | 3578  |
| 73.62          | 848              | 3610  |
| 73.64          | 843              | 3622  |
| 73.66          | 906              | 3602  |
| 73.68          | 888              | 3601  |
| 73.7           | 826              | 3676  |
| 73.72          | 900              | 3647  |
| 73.74          | 896              | 3651  |
| 73.76          | 827              | 3697  |
| 73.78          | 863              | 3685  |
| 73.8           | 871              | 3658  |
| 73.82          | 816              | 3655  |
| 73.84          | 826              | 3684  |
| 73.86          | 882              | 3689  |
| 73.88          | 922              | 3644  |
| 73.9           | 872              | 3682  |
| 73.92          | 908              | 3747  |
| 73.94          | 861              | 3710  |
| 73.96          | 867              | 3703  |
| 73.98          | 883              | 3742  |
| 74             | 814              | 3773  |
| 74.02          | 853              | 3731  |
| 74.04          | 836              | 3782  |
| 74.06          | 877              | 3746  |
| 74.08          | 793              | 3692  |
| 74.1           | 875              | 3771  |
| 74.12          | 848              | 3754  |
| 74.14          | 865              | 3722  |
| 74.16          | 845              | 3740  |
| 74.18          | 864              | 3758  |
| 74.2           | 896              | 3709  |
| 74.22          | 857              | 3700  |
| 74.24          | 855              | 3766  |
| 74.26          | 886              | 3746  |
| 74.28          | 927              | 3730  |
| 74.3           | 906              | 3695  |
| 74.32          | 869              | 3737  |
| 74.34          | 899              | 3721  |
| 74.36          | 868              | 3757  |
| 74.38          | 898              | 3681  |
| 74.4           | 936              | 3699  |
| 74.42          | 841              | 3696  |

| 2 $\theta$ (°) | Intencity (a.u.) |       |
|----------------|------------------|-------|
|                | Fe/S@CMIBWS      | MIBWS |
| 74.44          | 889              | 3728  |
| 74.46          | 917              | 3647  |
| 74.48          | 879              | 3682  |
| 74.5           | 857              | 3644  |
| 74.52          | 915              | 3744  |
| 74.54          | 850              | 3681  |
| 74.56          | 911              | 3688  |
| 74.58          | 837              | 3627  |
| 74.6           | 864              | 3646  |
| 74.62          | 871              | 3699  |
| 74.64          | 868              | 3617  |
| 74.66          | 851              | 3641  |
| 74.68          | 898              | 3583  |
| 74.7           | 830              | 3654  |
| 74.72          | 884              | 3668  |
| 74.74          | 884              | 3648  |
| 74.76          | 863              | 3626  |
| 74.78          | 822              | 3647  |
| 74.8           | 878              | 3615  |
| 74.82          | 855              | 3643  |
| 74.84          | 824              | 3605  |
| 74.86          | 791              | 3650  |
| 74.88          | 800              | 3688  |
| 74.9           | 866              | 3627  |
| 74.92          | 857              | 3637  |
| 74.94          | 829              | 3651  |
| 74.96          | 823              | 3632  |
| 74.98          | 803              | 3643  |
| 75             | 840              | 3637  |
| 75.02          | 790              | 3675  |
| 75.04          | 820              | 3659  |
| 75.06          | 822              | 3656  |
| 75.08          | 845              | 3614  |
| 75.1           | 850              | 3603  |
| 75.12          | 825              | 3684  |
| 75.14          | 824              | 3644  |
| 75.16          | 855              | 3687  |
| 75.18          | 871              | 3630  |
| 75.2           | 837              | 3650  |
| 75.22          | 875              | 3684  |
| 75.24          | 842              | 3645  |
| 75.26          | 870              | 3679  |
| 75.28          | 876              | 3636  |
| 75.3           | 850              | 3591  |
| 75.32          | 836              | 3680  |
| 75.34          | 854              | 3613  |
| 75.36          | 892              | 3627  |
| 75.38          | 859              | 3614  |
| 75.4           | 835              | 3709  |
| 75.42          | 847              | 3646  |
| 75.44          | 872              | 3614  |
| 75.46          | 867              | 3648  |
| 75.48          | 839              | 3628  |
| 75.5           | 829              | 3637  |
| 75.52          | 786              | 3686  |
| 75.54          | 784              | 3594  |
| 75.56          | 857              | 3567  |
| 75.58          | 827              | 3561  |
| 75.6           | 864              | 3616  |
| 75.62          | 822              | 3594  |
| 75.64          | 837              | 3616  |
| 75.66          | 813              | 3584  |

| 2 $\theta$ (°) | Intencity (a.u.) |       |
|----------------|------------------|-------|
|                | Fe/S@CMIBWS      | MIBWS |
| 75.68          | 820              | 3627  |
| 75.7           | 848              | 3599  |
| 75.72          | 851              | 3596  |
| 75.74          | 859              | 3588  |
| 75.76          | 807              | 3583  |
| 75.78          | 839              | 3546  |
| 75.8           | 846              | 3605  |
| 75.82          | 825              | 3622  |
| 75.84          | 823              | 3580  |
| 75.86          | 800              | 3545  |
| 75.88          | 863              | 3597  |
| 75.9           | 893              | 3613  |
| 75.92          | 801              | 3639  |
| 75.94          | 824              | 3588  |
| 75.96          | 827              | 3599  |
| 75.98          | 842              | 3547  |
| 76             | 842              | 3600  |
| 76.02          | 825              | 3543  |
| 76.04          | 880              | 3590  |
| 76.06          | 843              | 3552  |
| 76.08          | 858              | 3627  |
| 76.1           | 842              | 3598  |
| 76.12          | 832              | 3652  |
| 76.14          | 808              | 3538  |
| 76.16          | 761              | 3617  |
| 76.18          | 755              | 3592  |
| 76.2           | 835              | 3597  |
| 76.22          | 803              | 3577  |
| 76.24          | 803              | 3535  |
| 76.26          | 831              | 3571  |
| 76.28          | 816              | 3616  |
| 76.3           | 842              | 3580  |
| 76.32          | 814              | 3524  |
| 76.34          | 852              | 3580  |
| 76.36          | 761              | 3554  |
| 76.38          | 815              | 3639  |
| 76.4           | 869              | 3572  |
| 76.42          | 826              | 3580  |
| 76.44          | 831              | 3503  |
| 76.46          | 793              | 3655  |
| 76.48          | 869              | 3595  |
| 76.5           | 832              | 3525  |
| 76.52          | 802              | 3548  |
| 76.54          | 827              | 3562  |
| 76.56          | 793              | 3613  |
| 76.58          | 835              | 3602  |
| 76.6           | 846              | 3592  |
| 76.62          | 798              | 3535  |
| 76.64          | 831              | 3637  |
| 76.66          | 804              | 3596  |
| 76.68          | 803              | 3479  |
| 76.7           | 802              | 3593  |
| 76.72          | 805              | 3595  |
| 76.74          | 793              | 3552  |
| 76.76          | 809              | 3616  |
| 76.78          | 859              | 3548  |
| 76.8           | 774              | 3588  |
| 76.82          | 811              | 3573  |
| 76.84          | 815              | 3589  |
| 76.86          | 795              | 3618  |
| 76.88          | 793              | 3600  |
| 76.9           | 794              | 3600  |

| 2 $\theta$ (°) | Intencity (a.u.) |       |
|----------------|------------------|-------|
|                | Fe/S@CMIBWS      | MIBWS |
| 76.92          | 790              | 3665  |
| 76.94          | 854              | 3552  |
| 76.96          | 770              | 3581  |
| 76.98          | 775              | 3566  |
| 77             | 828              | 3574  |
| 77.02          | 837              | 3543  |
| 77.04          | 830              | 3563  |
| 77.06          | 816              | 3591  |
| 77.08          | 768              | 3593  |
| 77.1           | 811              | 3546  |
| 77.12          | 822              | 3609  |
| 77.14          | 791              | 3604  |
| 77.16          | 798              | 3562  |
| 77.18          | 821              | 3641  |
| 77.2           | 759              | 3581  |
| 77.22          | 795              | 3586  |
| 77.24          | 791              | 3587  |
| 77.26          | 773              | 3579  |
| 77.28          | 805              | 3553  |
| 77.3           | 777              | 3579  |
| 77.32          | 810              | 3597  |
| 77.34          | 828              | 3602  |
| 77.36          | 865              | 3604  |
| 77.38          | 804              | 3602  |
| 77.4           | 803              | 3527  |
| 77.42          | 796              | 3546  |
| 77.44          | 778              | 3633  |
| 77.46          | 771              | 3627  |
| 77.48          | 823              | 3592  |
| 77.5           | 813              | 3590  |
| 77.52          | 788              | 3600  |
| 77.54          | 809              | 3557  |
| 77.56          | 779              | 3589  |
| 77.58          | 816              | 3617  |
| 77.6           | 813              | 3573  |
| 77.62          | 797              | 3537  |
| 77.64          | 837              | 3580  |
| 77.66          | 826              | 3555  |
| 77.68          | 808              | 3546  |
| 77.7           | 850              | 3624  |
| 77.72          | 818              | 3544  |
| 77.74          | 820              | 3611  |
| 77.76          | 807              | 3588  |
| 77.78          | 861              | 3600  |
| 77.8           | 826              | 3516  |
| 77.82          | 825              | 3604  |
| 77.84          | 784              | 3633  |
| 77.86          | 806              | 3632  |
| 77.88          | 850              | 3593  |
| 77.9           | 847              | 3558  |
| 77.92          | 815              | 3578  |
| 77.94          | 837              | 3542  |
| 77.96          | 871              | 3591  |
| 77.98          | 791              | 3596  |
| 78             | 865              | 3641  |
| 78.02          | 831              | 3580  |
| 78.04          | 786              | 3548  |
| 78.06          | 822              | 3591  |
| 78.08          | 802              | 3537  |
| 78.1           | 870              | 3612  |
| 78.12          | 823              | 3597  |
| 78.14          | 848              | 3606  |

| 2 $\theta$ (°) | Intencity (a.u.) |       |
|----------------|------------------|-------|
|                | Fe/S@CMIBWS      | MIBWS |
| 78.16          | 791              | 3566  |
| 78.18          | 809              | 3599  |
| 78.2           | 835              | 3563  |
| 78.22          | 834              | 3519  |
| 78.24          | 818              | 3588  |
| 78.26          | 806              | 3610  |
| 78.28          | 814              | 3654  |
| 78.3           | 844              | 3535  |
| 78.32          | 779              | 3614  |
| 78.34          | 823              | 3618  |
| 78.36          | 812              | 3612  |
| 78.38          | 771              | 3600  |
| 78.4           | 772              | 3600  |
| 78.42          | 786              | 3603  |
| 78.44          | 867              | 3617  |
| 78.46          | 785              | 3552  |
| 78.48          | 838              | 3595  |
| 78.5           | 817              | 3641  |
| 78.52          | 794              | 3605  |
| 78.54          | 796              | 3589  |
| 78.56          | 802              | 3532  |
| 78.58          | 803              | 3560  |
| 78.6           | 787              | 3611  |
| 78.62          | 779              | 3583  |
| 78.64          | 820              | 3664  |
| 78.66          | 813              | 3621  |
| 78.68          | 863              | 3589  |
| 78.7           | 812              | 3558  |
| 78.72          | 794              | 3607  |
| 78.74          | 831              | 3623  |
| 78.76          | 858              | 3610  |
| 78.78          | 803              | 3602  |
| 78.8           | 822              | 3669  |
| 78.82          | 847              | 3604  |
| 78.84          | 838              | 3603  |
| 78.86          | 805              | 3639  |
| 78.88          | 797              | 3604  |
| 78.9           | 796              | 3597  |
| 78.92          | 811              | 3658  |
| 78.94          | 872              | 3651  |
| 78.96          | 824              | 3571  |
| 78.98          | 801              | 3646  |
| 79             | 857              | 3647  |
| 79.02          | 838              | 3558  |
| 79.04          | 876              | 3615  |
| 79.06          | 792              | 3666  |
| 79.08          | 820              | 3679  |
| 79.1           | 786              | 3682  |
| 79.12          | 778              | 3645  |
| 79.14          | 793              | 3632  |
| 79.16          | 797              | 3657  |
| 79.18          | 821              | 3623  |
| 79.2           | 782              | 3579  |
| 79.22          | 800              | 3597  |
| 79.24          | 852              | 3619  |
| 79.26          | 822              | 3640  |
| 79.28          | 807              | 3607  |
| 79.3           | 777              | 3610  |
| 79.32          | 767              | 3675  |
| 79.34          | 766              | 3575  |
| 79.36          | 858              | 3620  |
| 79.38          | 872              | 3602  |

| 2 $\theta$ (°) | Intencity (a.u.) |       |
|----------------|------------------|-------|
|                | Fe/S@CMIBWS      | MIBWS |
| 79.4           | 775              | 3540  |
| 79.42          | 833              | 3534  |
| 79.44          | 787              | 3582  |
| 79.46          | 816              | 3594  |
| 79.48          | 843              | 3608  |
| 79.5           | 808              | 3625  |
| 79.52          | 781              | 3642  |
| 79.54          | 805              | 3558  |
| 79.56          | 862              | 3623  |
| 79.58          | 829              | 3567  |
| 79.6           | 796              | 3594  |
| 79.62          | 813              | 3631  |
| 79.64          | 760              | 3582  |
| 79.66          | 838              | 3594  |
| 79.68          | 796              | 3598  |
| 79.7           | 793              | 3589  |
| 79.72          | 773              | 3624  |
| 79.74          | 798              | 3573  |
| 79.76          | 819              | 3607  |
| 79.78          | 846              | 3603  |
| 79.8           | 797              | 3560  |
| 79.82          | 843              | 3607  |
| 79.84          | 790              | 3598  |
| 79.86          | 844              | 3556  |
| 79.88          | 792              | 3625  |
| 79.9           | 775              | 3621  |
| 79.92          | 801              | 3588  |
| 79.94          | 782              | 3602  |
| 79.96          | 811              | 3572  |
| 79.98          | 811              | 3572  |
| 80             | 834              | 3570  |
| 80.02          | 809              | 3576  |
| 80.04          | 813              | 3579  |
| 80.06          | 838              | 3654  |
| 80.08          | 829              | 3551  |
| 80.1           | 828              | 3565  |
| 80.12          | 829              | 3566  |
| 80.14          | 809              | 3590  |
| 80.16          | 805              | 3576  |
| 80.18          | 828              | 3589  |
| 80.2           | 742              | 3639  |
| 80.22          | 789              | 3552  |
| 80.24          | 839              | 3583  |
| 80.26          | 795              | 3598  |
| 80.28          | 826              | 3582  |
| 80.3           | 832              | 3597  |
| 80.32          | 809              | 3593  |
| 80.34          | 823              | 3601  |
| 80.36          | 803              | 3576  |
| 80.38          | 807              | 3605  |
| 80.4           | 816              | 3578  |
| 80.42          | 808              | 3602  |
| 80.44          | 863              | 3581  |
| 80.46          | 806              | 3637  |
| 80.48          | 839              | 3588  |
| 80.5           | 818              | 3565  |
| 80.52          | 791              | 3596  |
| 80.54          | 823              | 3576  |
| 80.56          | 814              | 3554  |
| 80.58          | 801              | 3585  |
| 80.6           | 762              | 3567  |
| 80.62          | 809              | 3594  |

| 2 $\theta$ (°) | Intencity (a.u.) |       |
|----------------|------------------|-------|
|                | Fe/S@CMIBWS      | MIBWS |
| 80.64          | 803              | 3556  |
| 80.66          | 821              | 3584  |
| 80.68          | 823              | 3624  |
| 80.7           | 821              | 3592  |
| 80.72          | 846              | 3586  |
| 80.74          | 810              | 3574  |
| 80.76          | 826              | 3581  |
| 80.78          | 791              | 3587  |
| 80.8           | 817              | 3566  |
| 80.82          | 799              | 3552  |
| 80.84          | 896              | 3671  |
| 80.86          | 802              | 3606  |
| 80.88          | 865              | 3612  |
| 80.9           | 801              | 3568  |
| 80.92          | 820              | 3554  |
| 80.94          | 836              | 3654  |
| 80.96          | 819              | 3525  |
| 80.98          | 762              | 3574  |
| 81             | 726              | 3612  |
| 81.02          | 830              | 3562  |
| 81.04          | 820              | 3624  |
| 81.06          | 804              | 3599  |
| 81.08          | 786              | 3543  |
| 81.1           | 774              | 3551  |
| 81.12          | 817              | 3589  |
| 81.14          | 848              | 3610  |
| 81.16          | 824              | 3487  |
| 81.18          | 784              | 3552  |
| 81.2           | 814              | 3599  |
| 81.22          | 869              | 3523  |
| 81.24          | 826              | 3510  |
| 81.26          | 790              | 3561  |
| 81.28          | 841              | 3556  |
| 81.3           | 825              | 3567  |
| 81.32          | 803              | 3583  |
| 81.34          | 802              | 3626  |
| 81.36          | 835              | 3646  |
| 81.38          | 780              | 3564  |
| 81.4           | 788              | 3618  |
| 81.42          | 788              | 3594  |
| 81.44          | 838              | 3604  |
| 81.46          | 794              | 3606  |
| 81.48          | 832              | 3623  |
| 81.5           | 804              | 3575  |
| 81.52          | 818              | 3575  |
| 81.54          | 824              | 3635  |
| 81.56          | 772              | 3562  |
| 81.58          | 817              | 3633  |
| 81.6           | 814              | 3623  |
| 81.62          | 817              | 3525  |
| 81.64          | 806              | 3603  |
| 81.66          | 791              | 3597  |
| 81.68          | 797              | 3578  |
| 81.7           | 759              | 3577  |
| 81.72          | 803              | 3609  |
| 81.74          | 808              | 3654  |
| 81.76          | 853              | 3604  |
| 81.78          | 826              | 3571  |
| 81.8           | 726              | 3607  |
| 81.82          | 816              | 3546  |
| 81.84          | 817              | 3604  |
| 81.86          | 794              | 3552  |

| 2 $\theta$ (°) | Intencity (a.u.) |       |
|----------------|------------------|-------|
|                | Fe/S@CMIBWS      | MIBWS |
| 81.88          | 825              | 3558  |
| 81.9           | 826              | 3535  |
| 81.92          | 859              | 3592  |
| 81.94          | 820              | 3564  |
| 81.96          | 755              | 3527  |
| 81.98          | 820              | 3630  |
| 82             | 842              | 3626  |
| 82.02          | 819              | 3563  |
| 82.04          | 834              | 3593  |
| 82.06          | 814              | 3618  |
| 82.08          | 819              | 3548  |
| 82.1           | 857              | 3586  |
| 82.12          | 788              | 3547  |
| 82.14          | 859              | 3585  |
| 82.16          | 848              | 3618  |
| 82.18          | 796              | 3553  |
| 82.2           | 775              | 3601  |
| 82.22          | 816              | 3548  |
| 82.24          | 807              | 3628  |
| 82.26          | 838              | 3515  |
| 82.28          | 778              | 3566  |
| 82.3           | 806              | 3616  |
| 82.32          | 815              | 3653  |
| 82.34          | 791              | 3595  |
| 82.36          | 778              | 3572  |
| 82.38          | 798              | 3580  |
| 82.4           | 827              | 3578  |
| 82.42          | 768              | 3585  |
| 82.44          | 769              | 3558  |
| 82.46          | 829              | 3596  |
| 82.48          | 782              | 3606  |
| 82.5           | 782              | 3588  |
| 82.52          | 794              | 3617  |
| 82.54          | 786              | 3617  |
| 82.56          | 831              | 3492  |
| 82.58          | 795              | 3578  |
| 82.6           | 764              | 3530  |
| 82.62          | 847              | 3589  |
| 82.64          | 813              | 3574  |
| 82.66          | 864              | 3601  |
| 82.68          | 838              | 3601  |
| 82.7           | 769              | 3581  |
| 82.72          | 863              | 3603  |
| 82.74          | 818              | 3588  |
| 82.76          | 828              | 3567  |
| 82.78          | 831              | 3611  |
| 82.8           | 779              | 3619  |
| 82.82          | 771              | 3570  |
| 82.84          | 775              | 3591  |
| 82.86          | 864              | 3594  |
| 82.88          | 812              | 3554  |
| 82.9           | 821              | 3640  |
| 82.92          | 751              | 3563  |
| 82.94          | 812              | 3576  |
| 82.96          | 860              | 3632  |
| 82.98          | 838              | 3545  |
| 83             | 807              | 3549  |
| 83.02          | 808              | 3617  |
| 83.04          | 835              | 3548  |
| 83.06          | 845              | 3573  |
| 83.08          | 842              | 3614  |
| 83.1           | 762              | 3635  |



| 2 $\theta$ (°) | Intencity (a.u.) |       |
|----------------|------------------|-------|
|                | Fe/S@CMIBWS      | MIBWS |
| 83.12          | 766              | 3584  |
| 83.14          | 774              | 3537  |
| 83.16          | 803              | 3570  |
| 83.18          | 796              | 3580  |
| 83.2           | 818              | 3600  |
| 83.22          | 798              | 3562  |
| 83.24          | 792              | 3604  |
| 83.26          | 765              | 3576  |
| 83.28          | 827              | 3571  |
| 83.3           | 804              | 3622  |
| 83.32          | 796              | 3570  |
| 83.34          | 802              | 3579  |
| 83.36          | 831              | 3534  |
| 83.38          | 803              | 3635  |
| 83.4           | 766              | 3579  |
| 83.42          | 791              | 3583  |
| 83.44          | 816              | 3569  |
| 83.46          | 786              | 3632  |
| 83.48          | 820              | 3567  |
| 83.5           | 784              | 3597  |
| 83.52          | 818              | 3516  |
| 83.54          | 736              | 3538  |
| 83.56          | 830              | 3536  |
| 83.58          | 768              | 3580  |
| 83.6           | 761              | 3539  |
| 83.62          | 786              | 3608  |
| 83.64          | 842              | 3600  |
| 83.66          | 783              | 3528  |
| 83.68          | 817              | 3545  |
| 83.7           | 802              | 3597  |
| 83.72          | 799              | 3525  |
| 83.74          | 786              | 3549  |
| 83.76          | 814              | 3592  |
| 83.78          | 870              | 3622  |
| 83.8           | 814              | 3565  |
| 83.82          | 818              | 3562  |
| 83.84          | 860              | 3605  |
| 83.86          | 834              | 3567  |
| 83.88          | 824              | 3600  |
| 83.9           | 789              | 3565  |
| 83.92          | 805              | 3556  |
| 83.94          | 803              | 3627  |
| 83.96          | 853              | 3588  |
| 83.98          | 790              | 3561  |
| 84             | 733              | 3597  |
| 84.02          | 807              | 3573  |
| 84.04          | 809              | 3610  |
| 84.06          | 746              | 3623  |
| 84.08          | 801              | 3590  |
| 84.1           | 780              | 3596  |
| 84.12          | 804              | 3579  |
| 84.14          | 820              | 3634  |
| 84.16          | 798              | 3561  |
| 84.18          | 820              | 3536  |
| 84.2           | 806              | 3567  |
| 84.22          | 812              | 3595  |
| 84.24          | 811              | 3636  |
| 84.26          | 853              | 3495  |
| 84.28          | 831              | 3530  |
| 84.3           | 859              | 3570  |
| 84.32          | 720              | 3563  |
| 84.34          | 807              | 3585  |

| 2 $\theta$ (°) | Intencity (a.u.) |       |
|----------------|------------------|-------|
|                | Fe/S@CMIBWS      | MIBWS |
| 84.36          | 826              | 3530  |
| 84.38          | 830              | 3589  |
| 84.4           | 785              | 3610  |
| 84.42          | 769              | 3569  |
| 84.44          | 825              | 3571  |
| 84.46          | 798              | 3550  |
| 84.48          | 762              | 3578  |
| 84.5           | 803              | 3551  |
| 84.52          | 758              | 3576  |
| 84.54          | 777              | 3663  |
| 84.56          | 836              | 3647  |
| 84.58          | 787              | 3637  |
| 84.6           | 797              | 3590  |
| 84.62          | 795              | 3548  |
| 84.64          | 852              | 3600  |
| 84.66          | 800              | 3554  |
| 84.68          | 875              | 3588  |
| 84.7           | 782              | 3593  |
| 84.72          | 803              | 3552  |
| 84.74          | 795              | 3562  |
| 84.76          | 831              | 3556  |
| 84.78          | 832              | 3601  |
| 84.8           | 786              | 3639  |
| 84.82          | 819              | 3574  |
| 84.84          | 791              | 3558  |
| 84.86          | 795              | 3591  |
| 84.88          | 743              | 3623  |
| 84.9           | 808              | 3632  |
| 84.92          | 816              | 3583  |
| 84.94          | 844              | 3555  |
| 84.96          | 805              | 3529  |
| 84.98          | 781              | 3617  |
| 85             | 875              | 3580  |
| 85.02          | 785              | 3563  |
| 85.04          | 770              | 3574  |
| 85.06          | 817              | 3592  |
| 85.08          | 795              | 3574  |
| 85.1           | 747              | 3631  |
| 85.12          | 777              | 3539  |
| 85.14          | 840              | 3557  |
| 85.16          | 811              | 3570  |
| 85.18          | 846              | 3554  |
| 85.2           | 784              | 3643  |
| 85.22          | 779              | 3653  |
| 85.24          | 788              | 3598  |
| 85.26          | 786              | 3564  |
| 85.28          | 820              | 3550  |
| 85.3           | 725              | 3578  |
| 85.32          | 805              | 3550  |
| 85.34          | 794              | 3564  |
| 85.36          | 777              | 3527  |
| 85.38          | 784              | 3551  |
| 85.4           | 756              | 3550  |
| 85.42          | 777              | 3577  |
| 85.44          | 796              | 3600  |
| 85.46          | 793              | 3583  |
| 85.48          | 847              | 3644  |
| 85.5           | 812              | 3645  |
| 85.52          | 821              | 3648  |
| 85.54          | 813              | 3597  |
| 85.56          | 818              | 3593  |
| 85.58          | 792              | 3585  |

| 2 $\theta$ (°) | Intencity (a.u.) |       |
|----------------|------------------|-------|
|                | Fe/S@CMIBWS      | MIBWS |
| 85.6           | 852              | 3568  |
| 85.62          | 803              | 3624  |
| 85.64          | 814              | 3621  |
| 85.66          | 791              | 3537  |
| 85.68          | 758              | 3595  |
| 85.7           | 774              | 3626  |
| 85.72          | 795              | 3596  |
| 85.74          | 830              | 3614  |
| 85.76          | 803              | 3603  |
| 85.78          | 781              | 3575  |
| 85.8           | 813              | 3608  |
| 85.82          | 814              | 3653  |
| 85.84          | 793              | 3578  |
| 85.86          | 808              | 3575  |
| 85.88          | 776              | 3577  |
| 85.9           | 827              | 3615  |
| 85.92          | 830              | 3623  |
| 85.94          | 774              | 3635  |
| 85.96          | 787              | 3599  |
| 85.98          | 792              | 3608  |
| 86             | 817              | 3571  |
| 86.02          | 806              | 3614  |
| 86.04          | 807              | 3551  |
| 86.06          | 814              | 3587  |
| 86.08          | 806              | 3590  |
| 86.1           | 810              | 3538  |
| 86.12          | 843              | 3616  |
| 86.14          | 790              | 3594  |
| 86.16          | 798              | 3614  |
| 86.18          | 771              | 3593  |
| 86.2           | 812              | 3591  |
| 86.22          | 838              | 3587  |
| 86.24          | 829              | 3603  |
| 86.26          | 829              | 3600  |
| 86.28          | 769              | 3581  |
| 86.3           | 816              | 3603  |
| 86.32          | 816              | 3546  |
| 86.34          | 764              | 3575  |
| 86.36          | 824              | 3625  |
| 86.38          | 821              | 3598  |
| 86.4           | 789              | 3622  |
| 86.42          | 826              | 3580  |
| 86.44          | 798              | 3578  |
| 86.46          | 785              | 3627  |
| 86.48          | 826              | 3685  |
| 86.5           | 821              | 3627  |
| 86.52          | 792              | 3595  |
| 86.54          | 803              | 3586  |
| 86.56          | 787              | 3560  |
| 86.58          | 806              | 3560  |
| 86.6           | 803              | 3618  |
| 86.62          | 841              | 3656  |
| 86.64          | 832              | 3603  |
| 86.66          | 845              | 3571  |
| 86.68          | 758              | 3635  |
| 86.7           | 836              | 3671  |
| 86.72          | 773              | 3657  |
| 86.74          | 785              | 3635  |
| 86.76          | 758              | 3659  |
| 86.78          | 800              | 3618  |
| 86.8           | 772              | 3657  |
| 86.82          | 795              | 3602  |

| 2 $\theta$ (°) | Intencity (a.u.) |       |
|----------------|------------------|-------|
|                | Fe/S@CMIBWS      | MIBWS |
| 86.84          | 858              | 3661  |
| 86.86          | 814              | 3685  |
| 86.88          | 819              | 3591  |
| 86.9           | 818              | 3648  |
| 86.92          | 817              | 3646  |
| 86.94          | 761              | 3622  |
| 86.96          | 795              | 3695  |
| 86.98          | 775              | 3681  |
| 87             | 790              | 3605  |
| 87.02          | 821              | 3660  |
| 87.04          | 799              | 3688  |
| 87.06          | 781              | 3691  |
| 87.08          | 848              | 3633  |
| 87.1           | 837              | 3645  |
| 87.12          | 831              | 3596  |
| 87.14          | 877              | 3639  |
| 87.16          | 801              | 3575  |
| 87.18          | 869              | 3595  |
| 87.2           | 799              | 3663  |
| 87.22          | 859              | 3585  |
| 87.24          | 827              | 3630  |
| 87.26          | 804              | 3624  |
| 87.28          | 837              | 3617  |
| 87.3           | 787              | 3625  |
| 87.32          | 756              | 3588  |
| 87.34          | 801              | 3633  |
| 87.36          | 809              | 3671  |
| 87.38          | 883              | 3621  |
| 87.4           | 824              | 3639  |
| 87.42          | 783              | 3655  |
| 87.44          | 790              | 3604  |
| 87.46          | 815              | 3584  |
| 87.48          | 791              | 3671  |
| 87.5           | 816              | 3572  |
| 87.52          | 799              | 3655  |
| 87.54          | 793              | 3577  |
| 87.56          | 792              | 3573  |
| 87.58          | 830              | 3619  |
| 87.6           | 810              | 3656  |
| 87.62          | 804              | 3651  |
| 87.64          | 783              | 3564  |
| 87.66          | 794              | 3612  |
| 87.68          | 793              | 3637  |
| 87.7           | 836              | 3641  |
| 87.72          | 829              | 3632  |
| 87.74          | 797              | 3605  |
| 87.76          | 775              | 3588  |
| 87.78          | 813              | 3624  |
| 87.8           | 780              | 3644  |
| 87.82          | 805              | 3598  |
| 87.84          | 809              | 3584  |
| 87.86          | 785              | 3589  |
| 87.88          | 776              | 3652  |
| 87.9           | 807              | 3596  |
| 87.92          | 805              | 3581  |
| 87.94          | 878              | 3553  |
| 87.96          | 828              | 3678  |
| 87.98          | 821              | 3637  |
| 88             | 772              | 3586  |
| 88.02          | 815              | 3651  |
| 88.04          | 780              | 3637  |
| 88.06          | 816              | 3618  |

| 2 $\theta$ (°) | Intencity (a.u.) |       |
|----------------|------------------|-------|
|                | Fe/S@CMIBWS      | MIBWS |
| 88.08          | 795              | 3615  |
| 88.1           | 814              | 3640  |
| 88.12          | 787              | 3567  |
| 88.14          | 783              | 3608  |
| 88.16          | 775              | 3579  |
| 88.18          | 754              | 3609  |
| 88.2           | 813              | 3685  |
| 88.22          | 829              | 3566  |
| 88.24          | 838              | 3637  |
| 88.26          | 819              | 3592  |
| 88.28          | 831              | 3627  |
| 88.3           | 784              | 3658  |
| 88.32          | 809              | 3609  |
| 88.34          | 792              | 3610  |
| 88.36          | 831              | 3637  |
| 88.38          | 784              | 3604  |
| 88.4           | 866              | 3659  |
| 88.42          | 799              | 3533  |
| 88.44          | 801              | 3575  |
| 88.46          | 809              | 3634  |
| 88.48          | 790              | 3577  |
| 88.5           | 779              | 3615  |
| 88.52          | 776              | 3538  |
| 88.54          | 780              | 3586  |
| 88.56          | 799              | 3560  |
| 88.58          | 810              | 3597  |
| 88.6           | 779              | 3702  |
| 88.62          | 819              | 3591  |
| 88.64          | 814              | 3619  |
| 88.66          | 824              | 3599  |
| 88.68          | 798              | 3663  |
| 88.7           | 777              | 3601  |
| 88.72          | 781              | 3621  |
| 88.74          | 833              | 3632  |
| 88.76          | 780              | 3621  |
| 88.78          | 760              | 3659  |
| 88.8           | 819              | 3546  |
| 88.82          | 807              | 3612  |
| 88.84          | 764              | 3617  |
| 88.86          | 840              | 3592  |
| 88.88          | 828              | 3555  |
| 88.9           | 795              | 3640  |
| 88.92          | 803              | 3635  |
| 88.94          | 844              | 3613  |
| 88.96          | 783              | 3643  |
| 88.98          | 789              | 3677  |
| 89             | 814              | 3566  |
| 89.02          | 777              | 3624  |
| 89.04          | 810              | 3618  |
| 89.06          | 829              | 3664  |
| 89.08          | 835              | 3635  |
| 89.1           | 797              | 3617  |
| 89.12          | 760              | 3598  |
| 89.14          | 804              | 3659  |
| 89.16          | 772              | 3601  |
| 89.18          | 769              | 3560  |
| 89.2           | 814              | 3691  |
| 89.22          | 860              | 3696  |
| 89.24          | 814              | 3655  |
| 89.26          | 765              | 3688  |
| 89.28          | 796              | 3667  |
| 89.3           | 838              | 3673  |

| 2 $\theta$ (°) | Intencity (a.u.) |       |
|----------------|------------------|-------|
|                | Fe/S@CMIBWS      | MIBWS |
| 89.32          | 795              | 3667  |
| 89.34          | 815              | 3686  |
| 89.36          | 822              | 3619  |
| 89.38          | 819              | 3680  |
| 89.4           | 815              | 3650  |
| 89.42          | 793              | 3672  |
| 89.44          | 818              | 3709  |
| 89.46          | 834              | 3729  |
| 89.48          | 810              | 3735  |
| 89.5           | 793              | 3717  |
| 89.52          | 777              | 3686  |
| 89.54          | 825              | 3703  |
| 89.56          | 837              | 3715  |
| 89.58          | 834              | 3664  |
| 89.6           | 838              | 3686  |
| 89.62          | 818              | 3714  |
| 89.64          | 825              | 3738  |
| 89.66          | 826              | 3829  |
| 89.68          | 801              | 3763  |
| 89.7           | 884              | 3784  |
| 89.72          | 799              | 3856  |
| 89.74          | 870              | 3833  |
| 89.76          | 799              | 3789  |
| 89.78          | 815              | 3787  |
| 89.8           | 777              | 3769  |
| 89.82          | 826              | 3813  |
| 89.84          | 851              | 3830  |
| 89.86          | 879              | 3821  |
| 89.88          | 885              | 3814  |
| 89.9           | 870              | 3811  |
| 89.92          | 848              | 3760  |
| 89.94          | 825              | 3803  |
| 89.96          | 850              | 3795  |
| 89.98          | 845              | 3797  |
| 90             | 883              | 3815  |

| Relative Pressure (p/p <sub>0</sub> ) | V <sub>a</sub> /cm <sup>3</sup> (STP)g <sup>-1</sup> | Relative Pressure (p/p <sub>0</sub> ) | V <sub>a</sub> /cm <sup>3</sup> (STP)g <sup>-1</sup> |
|---------------------------------------|------------------------------------------------------|---------------------------------------|------------------------------------------------------|
| 0.011120067                           | 4.114630515                                          | 0.992920193                           | 57.30103625                                          |
| 0.056822127                           | 5.688864459                                          | 0.962739134                           | 52.60849837                                          |
| 0.085314354                           | 6.22717411                                           | 0.943980939                           | 49.46250546                                          |
| 0.120047302                           | 6.729241354                                          | 0.925919602                           | 46.8915848                                           |
| 0.155093101                           | 7.167495984                                          | 0.908507814                           | 44.30941114                                          |
| 0.190206934                           | 7.537735276                                          | 0.907906718                           | 43.71607994                                          |
| 0.225109463                           | 7.892028256                                          | 0.88968256                            | 41.43156528                                          |
| 0.260046997                           | 8.235625275                                          | 0.842101629                           | 34.65121863                                          |
| 0.294968215                           | 8.56                                                 | 0.819761034                           | 32.07330186                                          |
| 0.32996566                            | 8.862039889                                          | 0.785956674                           | 28.81689583                                          |
| 0.364809577                           | 9.175860229                                          | 0.750760308                           | 25.83086202                                          |
| 0.399840185                           | 9.513585255                                          | 0.715527399                           | 23.27665882                                          |
| 0.434819076                           | 9.853766898                                          | 0.68050121                            | 21.08181677                                          |
| 0.469764727                           | 10.23296178                                          | 0.645371207                           | 19.26528697                                          |
| 0.504795125                           | 10.64474138                                          | 0.610419875                           | 17.67499549                                          |
| 0.539766968                           | 11.04644064                                          | 0.575225894                           | 16.29330906                                          |
| 0.574687977                           | 11.51865109                                          | 0.540197816                           | 15.08087976                                          |
| 0.609760534                           | 12.07830769                                          | 0.505167905                           | 13.9861684                                           |
| 0.644683126                           | 12.75558763                                          | 0.471933699                           | 11.22865455                                          |
| 0.679692107                           | 13.60203133                                          | 0.435177413                           | 9.785022408                                          |
| 0.714648478                           | 14.63933247                                          | 0.381161025                           | 9.116354515                                          |
| 0.749543678                           | 15.95982927                                          | 0.345937608                           | 8.795978033                                          |
| 0.784419206                           | 17.73857973                                          | 0.31084281                            | 8.455647432                                          |
| 0.819239074                           | 20.11783164                                          | 0.275701696                           | 8.14516921                                           |
| 0.853953577                           | 23.42820567                                          | 0.240638321                           | 7.835380175                                          |
| 0.88854275                            | 28.03597433                                          | 0.224950237                           | 7.682271675                                          |
| 0.906910324                           | 31.32531393                                          | 0.18991597                            | 7.305822221                                          |
| 0.924282565                           | 34.89980193                                          | 0.154910173                           | 6.941625187                                          |
| 0.941070222                           | 39.25233676                                          | 0.100048828                           | 6.310447169                                          |
| 0.959006115                           | 44.46794209                                          |                                       |                                                      |
| 0.976247558                           | 50.08605545                                          |                                       |                                                      |
| 0.992920193                           | 57.30103625                                          |                                       |                                                      |

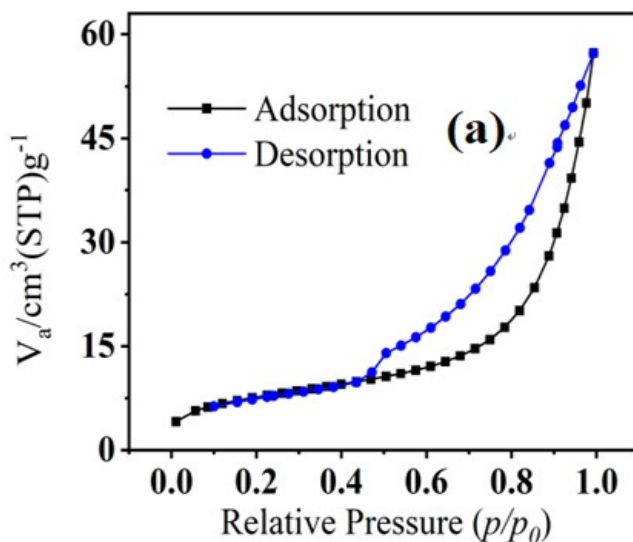

| Pore size (nm) | dV/dD(cm <sup>3</sup> g <sup>-1</sup> nm <sup>-1</sup> ) |
|----------------|----------------------------------------------------------|
| 1.8585793      | 0                                                        |
| 2.001546978    | 0                                                        |
| 2.16238568     | 0                                                        |
| 2.341095234    | 0                                                        |
| 2.519804789    | 0                                                        |
| 2.734256221    | 0                                                        |
| 2.948707652    | 0                                                        |
| 3.181030107    | 0                                                        |
| 3.431223586    | 0                                                        |
| 3.699287918    | 0                                                        |
| 4.003093956    | 0                                                        |
| 4.324771359    | 0                                                        |
| 4.664319445    | 0                                                        |
| 5.039609578    | 0.000842255                                              |
| 5.432770394    | 0.001226693                                              |
| 5.879544281    | 0.001451134                                              |
| 6.344189191    | 0.00175656                                               |
| 6.844575808    | 0.001981725                                              |
| 7.398575836    | 0.001915094                                              |
| 7.98831723     | 0.002171354                                              |
| 8.631671354    | 0.002999295                                              |
| 9.310767526    | 0.00313847                                               |
| 10.06134779    | 0.002469786                                              |
| 10.86554079    | 0.002563717                                              |
| 11.72334651    | 0.002484658                                              |
| 12.65263702    | 0.002374507                                              |
| 13.67128093    | 0.002340973                                              |
| 14.76140894    | 0.002279252                                              |
| 15.94089173    | 0.002201968                                              |
| 17.20973066    | 0.002006443                                              |
| 18.58579369    | 0.001738645                                              |
| 20.06908354    | 0.00158048                                               |
| 21.65959748    | 0.001496396                                              |
| 23.39307962    | 0.001389199                                              |
| 25.25166062    | 0.001228379                                              |
| 27.27107913    | 0.001052391                                              |
| 29.45133516    | 0.000678361                                              |
| 31.79242869    | 0.000571685                                              |
| 34.33010654    | 0.000634367                                              |
| 37.06436055    | 0.000504305                                              |
| 40.03094025    | 0.000403569                                              |
| 43.22984018    | 0.000264978                                              |
| 46.67893786    | 0.000241028                                              |
| 50.39609442    | 0.00029593                                               |
| 54.4170594     | 0.000268953                                              |
| 58.75969939    | 0.000185995                                              |
| 63.44189191    | 0.000156938                                              |
| 68.49937012    | 0.000173696                                              |
| 73.96788359    | 0.000108082                                              |
| 79.86529889    | 0.000087383                                              |
| 86.24523218    | 8.96095E-05                                              |
| 93.12554458    | 6.20731E-05                                              |
| 100.5598686    | 3.50656E-05                                              |
| 108.5660545    | 2.46847E-05                                              |
| 117.2334679    | 2.63476E-05                                              |
| 126.5799754    | 1.16044E-05                                              |
| 136.6770652    | 0                                                        |
| 147.5962256    | 0                                                        |
| 159.3553121    | 0                                                        |
| 172.0794346    | 0                                                        |

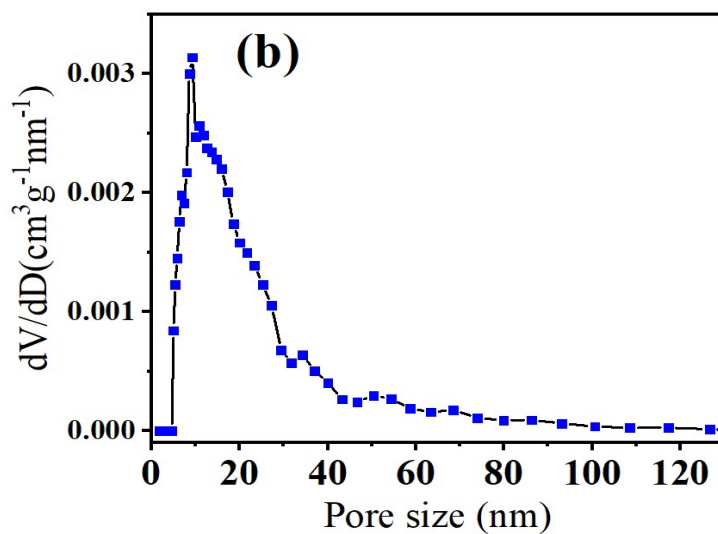



| pH | Adsorbing capacity (mg/g) | (Er±)       |
|----|---------------------------|-------------|
| 2  | 163                       | 0.228408533 |
| 3  | 99.09                     | 0.22423614  |
| 4  | 60.91                     | 1.093288186 |
| 5  | 52.24                     | 0.598292341 |
| 6  | 48.7                      | 1.234926264 |
| 7  | 27.25                     | 0.830305331 |
| 8  | 22.04                     | 0.461050713 |
| 9  | 16.77                     | 1.072826138 |
| 10 | 15.2                      | 0.525029749 |

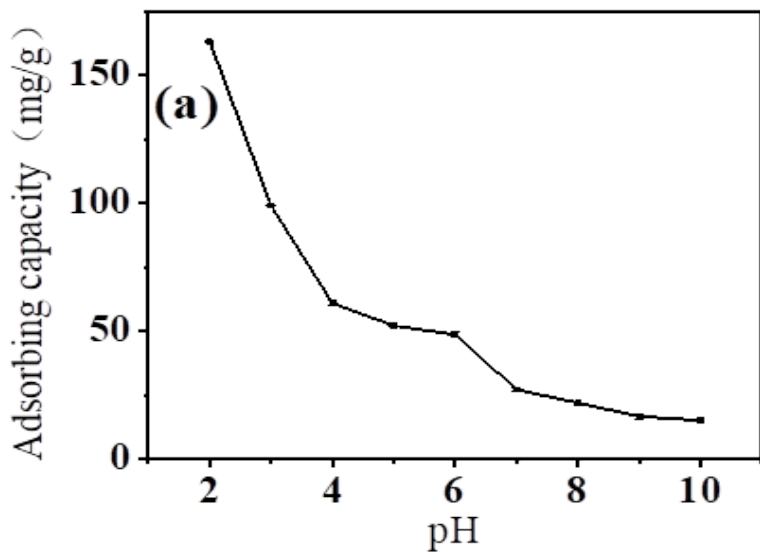

| pH | Zeta Potential (mv) | (Er±) |
|----|---------------------|-------|
| 2  | 20.033              | 0.208 |
| 3  | 17.600              | 1.153 |
| 4  | 5.000               | 0.900 |
| 5  | 2.933               | 0.814 |
| 6  | -15.333             | 0.252 |
| 7  | -55.733             | 0.153 |
| 8  | -57.800             | 0.100 |
| 9  | -65.500             | 0.400 |
| 10 | -74.167             | 0.513 |

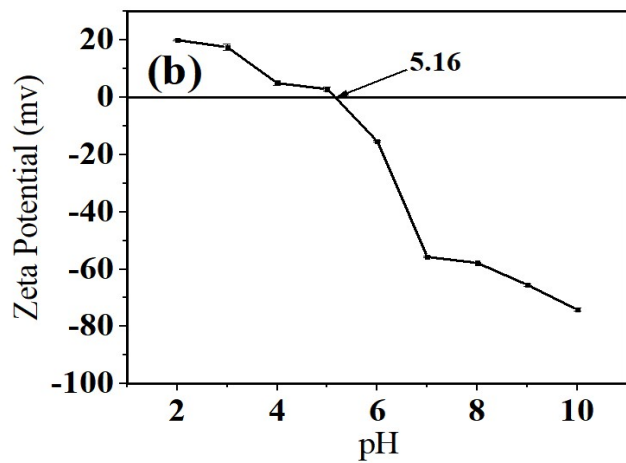

| Time (min) | 150mg/L     |             | 125mg/L     |             | 100mg/L     |             |
|------------|-------------|-------------|-------------|-------------|-------------|-------------|
|            | qt (mg/g)   | (Er±)       | qt (mg/g)   | (Er±)       | qt (mg/g)   | (Er±)       |
| 0          | 0           | 0           | 0           | 0           | 0           | 0           |
| 5          | 36.99969593 | 0.1312      | 31.35487279 | 0.188263386 | 27.14344406 | 0.131262772 |
| 10         | 38.28       | 0.2826      | 33.98       | 0.238108473 | 29.41       | 0.121114603 |
| 15         | 40.32       | 0.18390461  | 35.58       | 0.047201363 | 31.71       | 0.094157083 |
| 30         | 45.34       | 0.298362754 | 38.87       | 0.327770356 | 35.25       | 0.188263386 |
| 60         | 50.73       | 0.331239434 | 43.86       | 0.226705686 | 40.48       | 0.238108473 |
| 90         | 53.03       | 0.406559402 | 47.48       | 0.317444555 | 41.26       | 0.258197587 |
| 120        | 54.25       | 0.464775809 | 51.92       | 0.20047547  | 42.44       | 0.165953914 |
| 180        | 57.65       | 0.496377007 | 53.53       | 0.147431022 | 45.1        | 0.105983149 |
| 240        | 58.46       | 0.332073241 | 54.48       | 0.219333299 | 46.47       | 0.213612612 |
| 360        | 61.23       | 0.372989079 | 55.41       | 0.342263074 | 47.94       | 0.118093676 |
| 480        | 62.98       | 0.188742785 | 56.01       | 0.210787367 | 48.82       | 0.213757405 |
| 600        | 65.01       | 0.332125932 | 57.06       | 0.258336965 | 49          | 0.105983149 |
| 720        | 66.46862469 | 0.779965352 | 57.63094631 | 0.31215922  | 49.5305614  | 0.213612612 |
| 1080       | 69.39       | 0.50524822  | 59.74       | 0.14857487  | 50.53       | 0.118093676 |
| 1440       | 70          | 0.093355679 | 59.92       | 0.344643926 | 51.39       | 0.213757405 |
| 2880       | 71.97       | 0.4542      | 61.83       | 0.3852      | 53.28       | 0.213757405 |

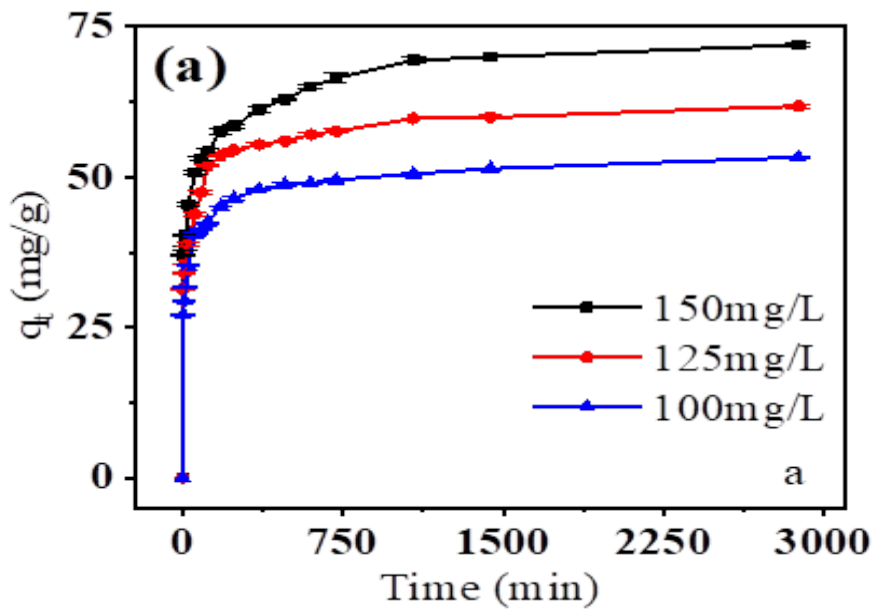

| Time (min) | ln(qe-qt)   |             |             |
|------------|-------------|-------------|-------------|
|            | 100mg/L     | 125mg/L     | 150mg/L     |
| 5          | 3.188274584 | 3.417074904 | 3.554642214 |
| 10         | 3.172434578 | 3.327137494 | 3.517454583 |
| 15         | 3.071454858 | 3.267725028 | 3.454761189 |
| 30         | 2.892171015 | 3.134167076 | 3.282130291 |
| 60         | 2.549791423 | 2.889096214 | 3.056289647 |
| 90         | 2.486686497 | 2.663935611 | 2.94132824  |
| 120        | 2.383137796 | 2.293605514 | 2.874908806 |
| 180        | 2.102196202 | 2.11738973  | 2.661719524 |
| 240        | 1.917912509 | 1.995850731 | 2.603601676 |
| 360        | 1.674675605 | 1.860571285 | 2.37404154  |
| 480        | 1.494592451 | 1.762258765 | 2.196696958 |
| 600        | 1.454473823 | 1.562375078 | 1.941544683 |
| 720        | 1.321606122 | 1.436049224 | 1.705906569 |
| 1080       | 1.010616314 | 0.739090536 | 0.951244195 |
| 1440       | 0.63429274  | 0.649351892 | 0.678699285 |

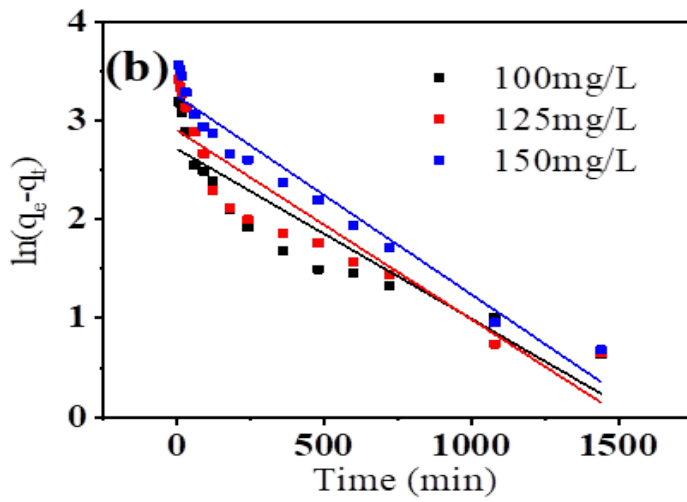

| Time (min) | t/qt        |             |             |
|------------|-------------|-------------|-------------|
|            | 150mg/L     | 125mg/L     | 100mg/L     |
| 5          | 0.184206543 | 0.159464847 | 0.135136246 |
| 10         | 0.33996857  | 0.294320922 | 0.261257196 |
| 15         | 0.473085621 | 0.421544283 | 0.371984408 |
| 30         | 0.851122159 | 0.771892731 | 0.661630149 |
| 60         | 1.482375767 | 1.36805315  | 1.182815373 |
| 90         | 2.181362194 | 1.895441731 | 1.69702416  |
| 120        | 2.827445237 | 2.311052496 | 2.211932955 |
| 180        | 3.991495823 | 3.362878043 | 3.122067266 |
| 240        | 5.164259453 | 4.405566174 | 4.105182823 |
| 360        | 7.508926792 | 6.497304511 | 5.879059295 |
| 480        | 9.831536524 | 8.569987155 | 7.62149771  |
| 600        | 12.24545517 | 10.51435106 | 9.229989416 |
| 720        | 14.53647969 | 12.49328783 | 10.83217839 |
| 1080       | 21.37229685 | 18.078046   | 15.56508361 |
| 1440       | 28.01866479 | 24.03176188 | 20.57034479 |
| 2880       | 54.05821886 | 46.57821004 | 40.01673564 |

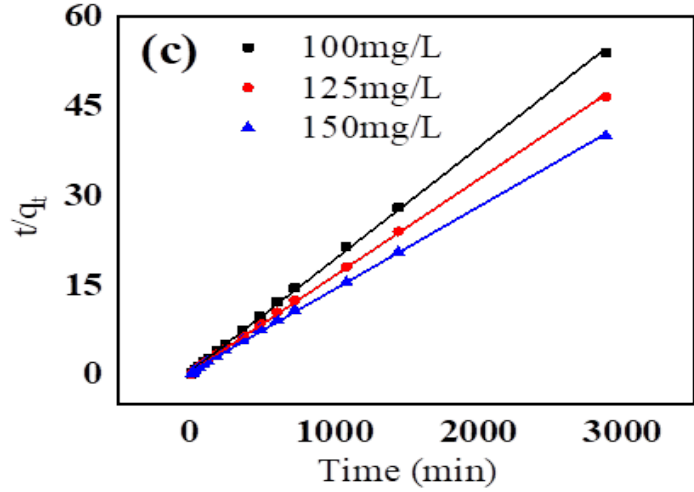

| ln(t)       | q <sub>t</sub> |             |             |
|-------------|----------------|-------------|-------------|
|             | 100mg/L        | 125mg/L     | 150mg/L     |
| 1.609437912 | 27.14344406    | 31.35487279 | 36.99969593 |
| 2.302585093 | 29.41448385    | 33.9765176  | 38.27645765 |
| 2.708050201 | 31.70673411    | 35.58345018 | 40.32427075 |
| 3.401197382 | 35.24758423    | 38.86550398 | 45.34255283 |
| 4.094344562 | 40.47556721    | 43.85794515 | 50.72642897 |
| 4.49980967  | 41.25862282    | 47.48233541 | 53.03401221 |
| 4.787491743 | 42.44114031    | 51.92439383 | 54.25119225 |
| 5.192956851 | 45.09587582    | 53.52558067 | 57.65410694 |
| 5.480638923 | 46.47326537    | 54.47653956 | 58.46268251 |
| 5.886104031 | 47.94293645    | 55.4075924  | 61.23428629 |
| 6.173786104 | 48.82248047    | 56.00941884 | 62.97974732 |
| 6.396929655 | 48.99777034    | 57.06486275 | 65.00549166 |
| 6.579251212 | 49.5305614     | 57.63094631 | 66.46862469 |
| 6.98471632  | 50.53270631    | 59.7409698  | 69.38607121 |
| 7.272398393 | 51.394312      | 59.92070025 | 70.00368805 |
| 7.965545573 | 53.27589515    | 61.83148724 | 71.96988845 |

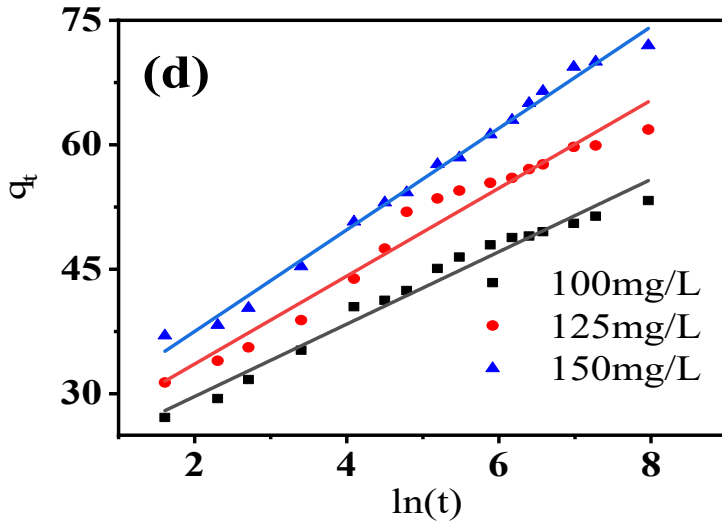

| 288K        |             |             |
|-------------|-------------|-------------|
| Ce (mg/L)   | qe (mg/g)   | (Er±)       |
| 0           | 0           | 0           |
| 0           | 27.48244782 | 0           |
| 0           | 41.12401509 | 0.23170574  |
| 0.671664974 | 54.14522391 | 0.097638634 |
| 3.820559276 | 66.76024334 | 0.139025579 |
| 11.40654621 | 77.55726801 | 0.421029741 |
| 21.49712644 | 81.40543954 | 0.248513873 |
| 36.12541774 | 86.55975487 | 0.508966184 |
| 58.69824575 | 89.62765953 | 0.355931398 |
| 81.31397357 | 93.23262716 | 0.106166037 |

| 298K        |             |             |
|-------------|-------------|-------------|
| Ce (mg/L)   | qe (mg/g)   | Er±         |
| 0           | 0           | 0           |
| 0           | 27.3457463  | 0.03848032  |
| 0           | 41.08248425 | 0.057810356 |
| 3.814812129 | 52.58609802 | 0.549330604 |
| 12.84552665 | 61.88315547 | 0.685703324 |
| 26.05628839 | 70.25322452 | 0.65477979  |
| 38.68767365 | 72.94275051 | 0.602442377 |
| 57.2552433  | 75.86562372 | 0.099986228 |
| 82.96430468 | 77.15604694 | 0.593895973 |
| 111.708545  | 78.2363116  | 0.665928962 |

| 308K        |             |             |
|-------------|-------------|-------------|
| Ce (mg/L)   | qe (mg/g)   | Er±         |
| 0           | 0           | 0           |
| 0           | 27.45502023 | 0.038788477 |
| 3.890115588 | 39.18531148 | 0.490385942 |
| 9.235724692 | 49.92489293 | 0.335539032 |
| 21.48708804 | 58.0426053  | 0.744723101 |
| 42.30215314 | 62.42521868 | 0.363256168 |
| 60.21174077 | 62.58513579 | 0.615348518 |
| 79.13508479 | 65.34412988 | 1.083673096 |
| 104.2029367 | 67.19121156 | 0.822100927 |
| 132.7782156 | 67.59211459 | 0.329357717 |

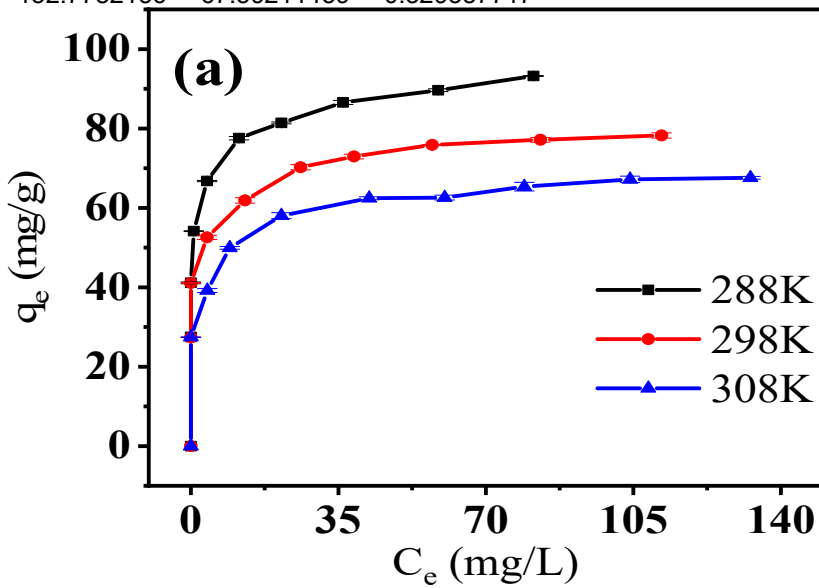

308K

| Ce (mg/L)   | C <sub>e</sub> /q <sub>e</sub> |
|-------------|--------------------------------|
| 0           | 0                              |
| 0           | 0                              |
| 0.671664974 | 0.012404879                    |
| 3.820559276 | 0.057228061                    |
| 11.40654621 | 0.147072563                    |
| 21.49712644 | 0.264074816                    |
| 36.12541774 | 0.417346581                    |
| 58.69824575 | 0.654912178                    |
| 81.31397357 | 0.872162204                    |

298K

| Ce (mg/L)   | C <sub>e</sub> /q <sub>e</sub> |
|-------------|--------------------------------|
| 0           | 0                              |
| 0           | 0                              |
| 3.814812129 | 0.072544119                    |
| 12.84552665 | 0.207577111                    |
| 26.05628839 | 0.370890996                    |
| 38.68767365 | 0.53038408                     |
| 57.2552433  | 0.754692844                    |
| 82.96430468 | 1.075279359                    |
| 111.708545  | 1.427835013                    |

288K

| Ce (mg/L)   | C <sub>e</sub> /q <sub>e</sub> |
|-------------|--------------------------------|
| 0           | 0                              |
| 3.890115588 | 0.099274842                    |
| 9.235724692 | 0.184992379                    |
| 21.48708804 | 0.370195099                    |
| 42.30215314 | 0.677645254                    |
| 60.21174077 | 0.962077337                    |
| 79.13508479 | 1.211051168                    |
| 104.2029367 | 1.550841759                    |
| 132.7782156 | 1.964403931                    |

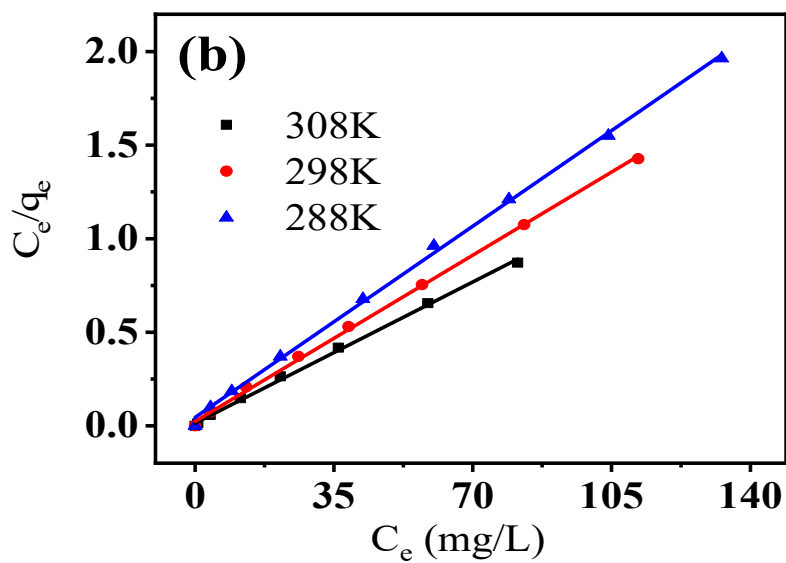



308K

| $\ln(C_e)$   | $\ln(q_e)$  |
|--------------|-------------|
| 0            | 3.31354754  |
| 0            | 3.71659226  |
| -0.397995613 | 3.991669768 |
| 1.340396819  | 4.201107744 |
| 2.43418742   | 4.351016605 |
| 3.067919272  | 4.399442096 |
| 3.58699671   | 4.460834983 |
| 4.072409841  | 4.495663972 |
| 4.398317878  | 4.535097737 |

298K

| $\ln(C_e)$  | $\ln(q_e)$  |
|-------------|-------------|
| 0           | 3.308560988 |
| 0           | 3.715581857 |
| 1.338891418 | 3.962451789 |
| 2.55299563  | 4.125248018 |
| 3.260259136 | 4.252106208 |
| 3.655521039 | 4.289674894 |
| 4.047519224 | 4.328963666 |
| 4.418410451 | 4.345829955 |
| 4.715893203 | 4.359733882 |

288K

| $\ln(C_e)$  | $\ln(q_e)$  |
|-------------|-------------|
| 0           | 3.312549037 |
| 1.358438871 | 3.668301969 |
| 2.223079083 | 3.910519735 |
| 3.067452198 | 4.061177315 |
| 3.744837986 | 4.133969339 |
| 4.097867363 | 4.136527802 |
| 4.371156326 | 4.17966761  |
| 4.646340312 | 4.207542459 |
| 4.888680184 | 4.213491328 |

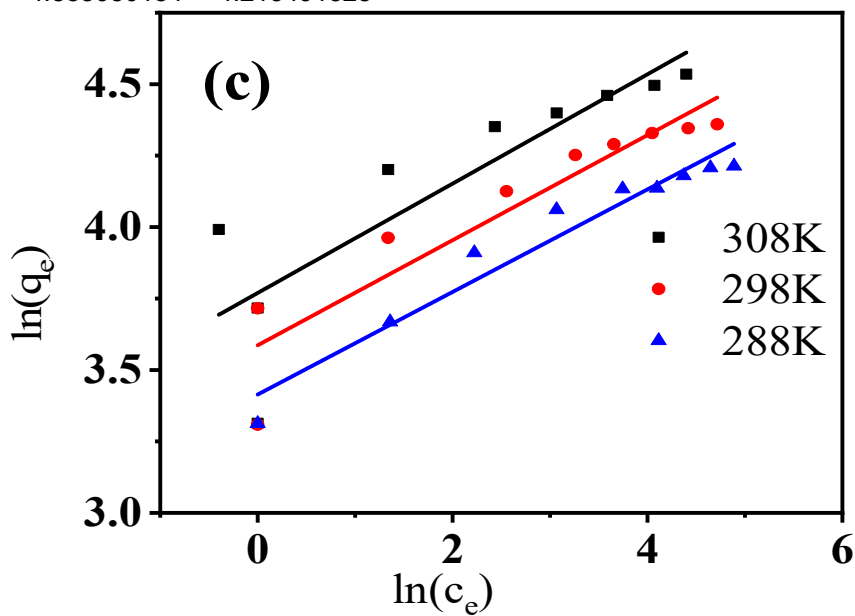

| $1/T$       | $\ln K_0$ |
|-------------|-----------|
| 0.003246753 | 1.66229   |
| 0.003355705 | 1.09604   |
| 0.003472222 | 0.6023    |

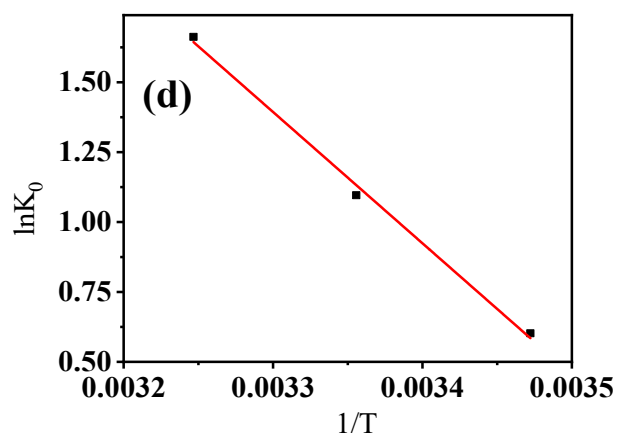

| Concentration (mg/L) | Blank                |             | Cl <sup>-</sup>      |             |
|----------------------|----------------------|-------------|----------------------|-------------|
|                      | Cr(VI) uptake (mg/g) | (Er±)       | Cr(VI) uptake (mg/g) | (Er±)       |
| 100                  | 59.92                | 0.342393348 | 55.84                | 1.679838499 |
| 200                  | 59.92                | 0.342393348 | 55.54                | 0.804823895 |
| 300                  | 59.92                | 0.342393348 | 53.93                | 0.607228194 |

| Concentration (mg/L) | Blank                |             | SO <sub>4</sub> <sup>2-</sup> |             |
|----------------------|----------------------|-------------|-------------------------------|-------------|
|                      | Cr(VI) uptake (mg/g) | (Er±)       | Cr(VI) uptake (mg/g)          | (Er±)       |
| 100                  | 59.92                | 0.342393348 | 55.37                         | 1.905467631 |
| 200                  | 59.92                | 0.342393348 | 54.58                         | 0.845647367 |
| 300                  | 59.92                | 0.342393348 | 50.12                         | 1.062170745 |

| Concentration (mg/L) | Blank                |             | PO <sub>4</sub> <sup>3-</sup> |             |
|----------------------|----------------------|-------------|-------------------------------|-------------|
|                      | Cr(VI) uptake (mg/g) | (Er±)       | Cr(VI) uptake (mg/g)          | (Er±)       |
| 100                  | 59.92                | 0.342393348 | 50.39                         | 1.863506958 |
| 200                  | 59.92                | 0.342393348 | 43.1                          | 0.712874807 |
| 300                  | 59.92                | 0.342393348 | 32.46                         | 0.979899105 |

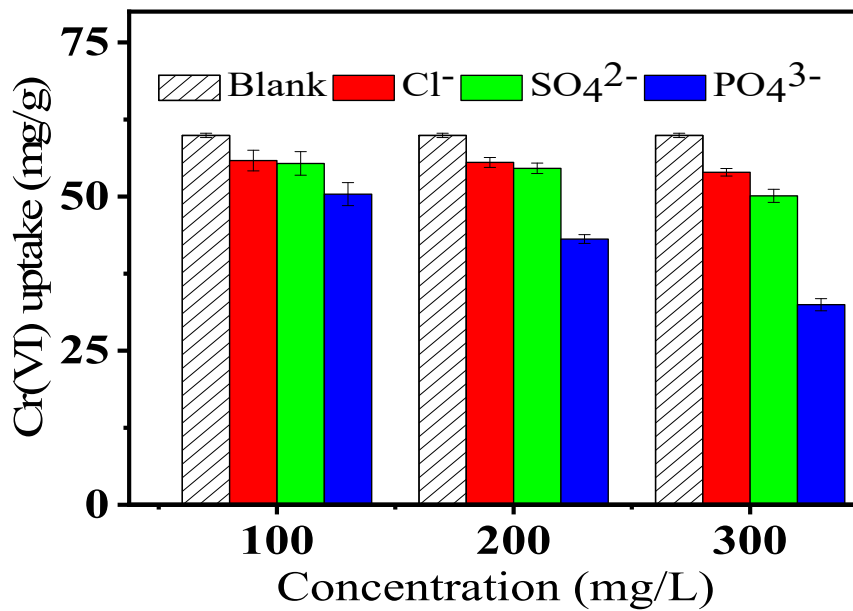

| Regeneration method | adsorption capacity(mg/g) | (Er±)       |
|---------------------|---------------------------|-------------|
| Not reuse           | 65.26264031               | 0.779163231 |
| None                | 45.93496331               | 0.32798201  |
| Acetic Acid(1M)     | 52.71461218               | 0.507082006 |
| HCl(1M)             | 58.77920127               | 0.321345061 |
| HCl(0.5M)           | 57.8365523                | 0.51617963  |
| HCl(0.1M)           | 55.96541499               | 0.13457983  |

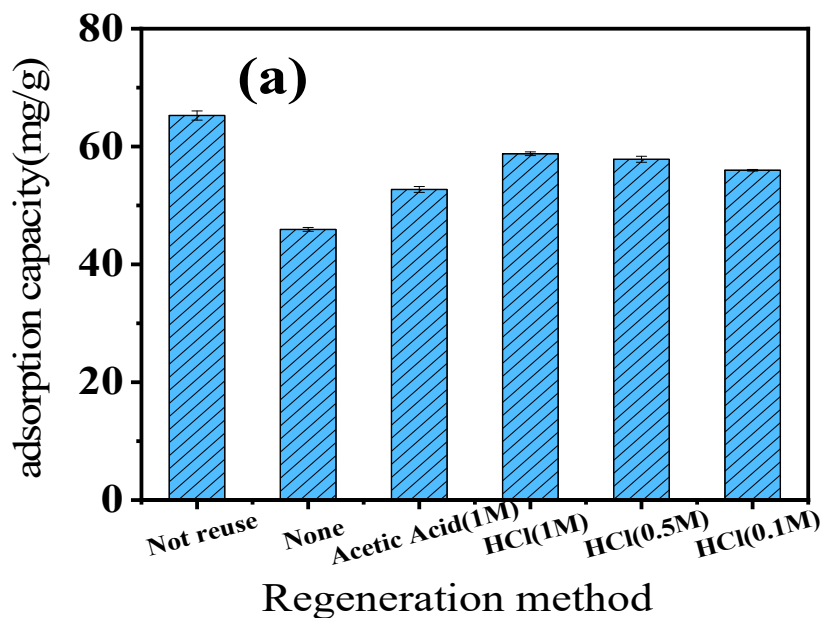

| Cycle number | Cr(VI) uptake (mg/g) | (Er±)       |
|--------------|----------------------|-------------|
| 0            | 65.26264031          | 0.779163231 |
| 1            | 59.36191188          | 0.720250741 |
| 2            | 50.69264694          | 0.61704507  |
| 3            | 44.86371795          | 1.284335607 |
| 4            | 25.67931336          | 0.918965323 |
| 5            | 19.45713625          | 1.789160703 |

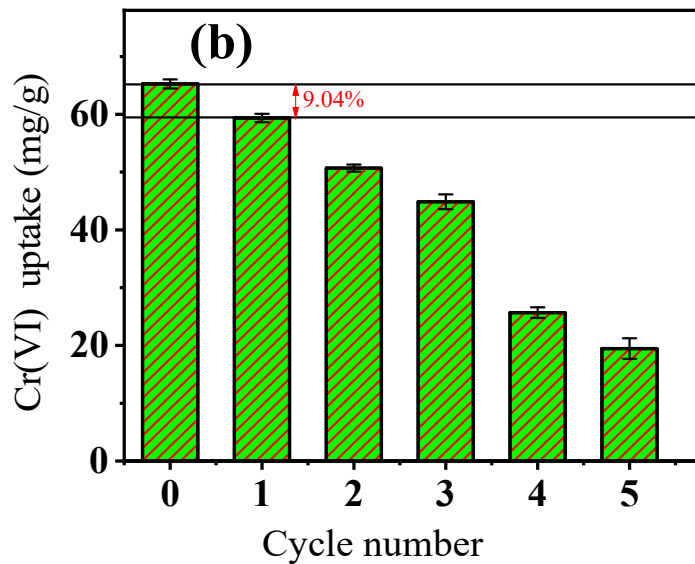

| Wavenumber (cm-1) | After    | Before   |
|-------------------|----------|----------|
| 401.1211          | 83.83911 | 73.83492 |
| 401.6032          | 83.58231 | 73.64321 |
| 402.0854          | 83.32549 | 73.45151 |
| 402.5675          | 83.06796 | 73.25916 |
| 403.0496          | 82.81187 | 73.06809 |
| 403.5317          | 82.56153 | 72.88217 |
| 404.0138          | 82.30975 | 72.69497 |
| 404.4959          | 82.05437 | 72.50456 |
| 404.9781          | 81.78465 | 72.30126 |
| 405.4602          | 81.48045 | 72.06704 |
| 405.9423          | 81.16763 | 71.82511 |
| 406.4244          | 80.86414 | 71.59156 |
| 406.9065          | 80.57359 | 71.36958 |
| 407.3886          | 80.30038 | 71.16293 |
| 407.8708          | 80.06016 | 70.98595 |
| 408.3529          | 79.86082 | 70.84572 |
| 408.835           | 79.73018 | 70.76759 |
| 409.3171          | 79.71387 | 70.79312 |
| 409.7992          | 79.76636 | 70.88062 |
| 410.2813          | 79.86053 | 71.00527 |
| 410.7635          | 79.98674 | 71.15807 |
| 411.2456          | 80.12566 | 71.32102 |
| 411.7277          | 80.27924 | 71.4962  |
| 412.2098          | 80.44583 | 71.68209 |
| 412.6919          | 80.61697 | 71.87139 |
| 413.174           | 80.7844  | 72.05748 |
| 413.6562          | 80.94582 | 72.23686 |
| 414.1383          | 81.09665 | 72.40431 |
| 414.6204          | 81.23543 | 72.55843 |
| 415.1025          | 81.36451 | 72.70146 |
| 415.5846          | 81.46787 | 72.81722 |
| 416.0667          | 81.53721 | 72.89736 |
| 416.5489          | 81.5519  | 72.92053 |
| 417.031           | 81.47758 | 72.85095 |
| 417.5131          | 81.34722 | 72.7235  |
| 417.9952          | 81.18032 | 72.55887 |
| 418.4773          | 80.98296 | 72.36382 |
| 418.9594          | 80.76797 | 72.1524  |
| 419.4416          | 80.53455 | 71.92358 |
| 419.9237          | 80.28365 | 71.67854 |
| 420.4058          | 80.0228  | 71.42484 |
| 420.8879          | 79.76109 | 71.17111 |
| 421.37            | 79.49486 | 70.91534 |
| 421.8521          | 79.22334 | 70.65807 |
| 422.3343          | 78.94707 | 70.40016 |
| 422.8164          | 78.66444 | 70.13993 |
| 423.2985          | 78.38114 | 69.88541 |
| 423.7806          | 78.10048 | 69.64103 |
| 424.2627          | 77.82803 | 69.41586 |
| 424.7448          | 77.57298 | 69.22476 |
| 425.227           | 77.3279  | 69.05462 |
| 425.7091          | 77.08873 | 68.89785 |
| 426.1912          | 76.85486 | 68.75272 |
| 426.6733          | 76.62421 | 68.61487 |
| 427.1554          | 76.39712 | 68.48458 |

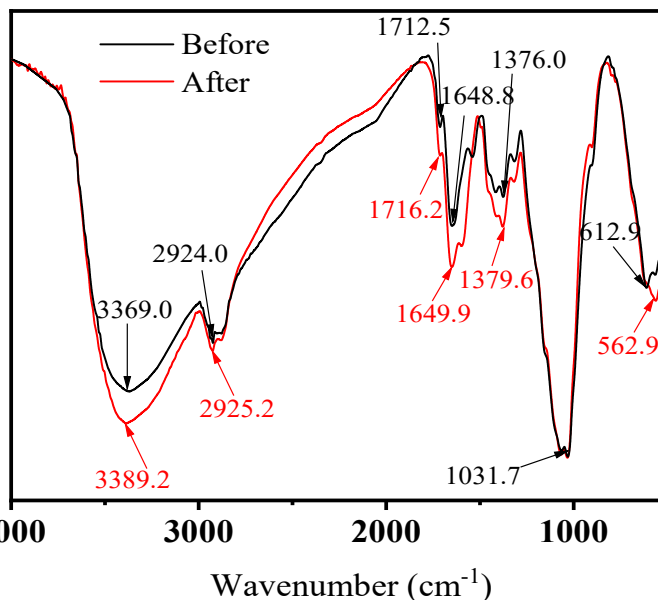

| Wavenumber (cm-1) | After    | Before   |
|-------------------|----------|----------|
| 427.6375          | 76.17389 | 68.36185 |
| 428.1197          | 75.95251 | 68.24314 |
| 428.6018          | 75.72984 | 68.12347 |
| 429.0839          | 75.50959 | 68.00727 |
| 429.566           | 75.29428 | 67.89725 |
| 430.0481          | 75.08444 | 67.79369 |
| 430.5302          | 74.88083 | 67.69749 |
| 431.0124          | 74.68526 | 67.6096  |
| 431.4945          | 74.49861 | 67.53034 |
| 431.9766          | 74.32433 | 67.46251 |
| 432.4587          | 74.16795 | 67.41071 |
| 432.9408          | 74.02399 | 67.36976 |
| 433.4229          | 73.88916 | 67.33642 |
| 433.9051          | 73.7624  | 67.30924 |
| 434.3872          | 73.64151 | 67.28562 |
| 434.8693          | 73.52654 | 67.26583 |
| 435.3514          | 73.41727 | 67.24949 |
| 435.8335          | 73.31235 | 67.23589 |
| 436.3156          | 73.21019 | 67.22482 |
| 436.7978          | 73.11134 | 67.21448 |
| 437.2799          | 73.01585 | 67.2031  |
| 437.762           | 72.92355 | 67.19027 |
| 438.2441          | 72.83463 | 67.17613 |
| 438.7262          | 72.74806 | 67.1572  |
| 439.2083          | 72.66325 | 67.13166 |
| 439.6905          | 72.57925 | 67.09454 |
| 440.1726          | 72.49452 | 67.03762 |
| 440.6547          | 72.41013 | 66.96893 |
| 441.1368          | 72.32658 | 66.89323 |
| 441.6189          | 72.24394 | 66.81216 |
| 442.101           | 72.16252 | 66.7291  |
| 442.5832          | 72.08202 | 66.64359 |
| 443.0653          | 72.00225 | 66.55577 |
| 443.5474          | 71.92319 | 66.467   |
| 444.0295          | 71.84484 | 66.37847 |
| 444.5116          | 71.76704 | 66.29075 |
| 444.9937          | 71.68974 | 66.20471 |
| 445.4759          | 71.61272 | 66.12053 |
| 445.958           | 71.53569 | 66.03765 |
| 446.4401          | 71.45891 | 65.9591  |
| 446.9222          | 71.3824  | 65.88638 |
| 447.4043          | 71.30656 | 65.82352 |
| 447.8864          | 71.23225 | 65.77728 |
| 448.3686          | 71.1582  | 65.74086 |
| 448.8507          | 71.0836  | 65.71022 |
| 449.3328          | 71.00778 | 65.68381 |
| 449.8149          | 70.92966 | 65.65851 |
| 450.297           | 70.84977 | 65.63493 |
| 450.7791          | 70.76803 | 65.6129  |
| 451.2613          | 70.68504 | 65.59161 |
| 451.7434          | 70.60232 | 65.57072 |
| 452.2255          | 70.51712 | 65.54868 |
| 452.7076          | 70.42725 | 65.52394 |
| 453.1897          | 70.33256 | 65.49627 |
| 453.6718          | 70.23325 | 65.46619 |

| Wavenumber (cm-1) | After    | Before   |
|-------------------|----------|----------|
| 454.154           | 70.12589 | 65.42993 |
| 454.6361          | 70.00887 | 65.38567 |
| 455.1182          | 69.87677 | 65.32808 |
| 455.6003          | 69.72037 | 65.2481  |
| 456.0824          | 69.5495  | 65.15506 |
| 456.5645          | 69.37012 | 65.05453 |
| 457.0467          | 69.18471 | 64.94868 |
| 457.5288          | 68.998   | 64.84174 |
| 458.0109          | 68.80933 | 64.73314 |
| 458.493           | 68.61919 | 64.62328 |
| 458.9751          | 68.42882 | 64.51353 |
| 459.4572          | 68.23871 | 64.40483 |
| 459.9394          | 68.05168 | 64.2989  |
| 460.4215          | 67.87051 | 64.19764 |
| 460.9036          | 67.69579 | 64.10148 |
| 461.3857          | 67.52699 | 64.00989 |
| 461.8678          | 67.37016 | 63.92754 |
| 462.3499          | 67.22828 | 63.85679 |
| 462.8321          | 67.10989 | 63.80409 |
| 463.3142          | 67.02921 | 63.78024 |
| 463.7963          | 66.97205 | 63.7745  |
| 464.2784          | 66.92995 | 63.7805  |
| 464.7606          | 66.89983 | 63.79595 |
| 465.2427          | 66.87554 | 63.81619 |
| 465.7248          | 66.8579  | 63.84187 |
| 466.2069          | 66.84645 | 63.87266 |
| 466.689           | 66.83885 | 63.90683 |
| 467.1711          | 66.83308 | 63.94289 |
| 467.6533          | 66.82771 | 63.97974 |
| 468.1354          | 66.82076 | 64.01592 |
| 468.6175          | 66.81178 | 64.0511  |
| 469.0996          | 66.80163 | 64.08596 |
| 469.5817          | 66.78447 | 64.11609 |
| 470.0638          | 66.75734 | 64.13925 |
| 470.546           | 66.7124  | 64.14954 |
| 471.0281          | 66.63647 | 64.13694 |
| 471.5102          | 66.54263 | 64.11143 |
| 471.9923          | 66.43864 | 64.0789  |
| 472.4744          | 66.32724 | 64.04153 |
| 472.9565          | 66.21399 | 64.0036  |
| 473.4387          | 66.09824 | 63.96454 |
| 473.9208          | 65.9804  | 63.92468 |
| 474.4029          | 65.86283 | 63.88563 |
| 474.885           | 65.74773 | 63.84881 |
| 475.3671          | 65.63587 | 63.81522 |
| 475.8492          | 65.52865 | 63.78626 |
| 476.3314          | 65.42644 | 63.76222 |
| 476.8135          | 65.32851 | 63.74248 |
| 477.2956          | 65.23959 | 63.73115 |
| 477.7777          | 65.16213 | 63.73029 |
| 478.2598          | 65.10229 | 63.74538 |
| 478.7419          | 65.07046 | 63.78567 |
| 479.2241          | 65.0565  | 63.84198 |
| 479.7062          | 65.05444 | 63.90888 |
| 480.1883          | 65.06227 | 63.98443 |



| Wavenumber (cm-1) | After    | Before   |
|-------------------|----------|----------|
| 480.6704          | 65.07589 | 64.06477 |
| 481.1525          | 65.09566 | 64.15031 |
| 481.6346          | 65.12127 | 64.24071 |
| 482.1168          | 65.15062 | 64.33422 |
| 482.5989          | 65.18142 | 64.4291  |
| 483.081           | 65.21397 | 64.52504 |
| 483.5631          | 65.24792 | 64.62125 |
| 484.0452          | 65.28304 | 64.71746 |
| 484.5273          | 65.31982 | 64.81412 |
| 485.0095          | 65.35566 | 64.9082  |
| 485.4916          | 65.38912 | 64.9981  |
| 485.9737          | 65.41708 | 65.07995 |
| 486.4558          | 65.43431 | 65.14728 |
| 486.9379          | 65.44562 | 65.20627 |
| 487.42            | 65.45378 | 65.2605  |
| 487.9022          | 65.45972 | 65.31123 |
| 488.3843          | 65.46541 | 65.36115 |
| 488.8664          | 65.47033 | 65.40962 |
| 489.3485          | 65.47443 | 65.45663 |
| 489.8306          | 65.47827 | 65.50282 |
| 490.3127          | 65.48222 | 65.54847 |
| 490.7949          | 65.48677 | 65.5947  |
| 491.277           | 65.49255 | 65.64269 |
| 491.7591          | 65.49953 | 65.69244 |
| 492.2412          | 65.50717 | 65.74338 |
| 492.7233          | 65.51755 | 65.79862 |
| 493.2054          | 65.53157 | 65.85965 |
| 493.6876          | 65.55216 | 65.93093 |
| 494.1697          | 65.58434 | 66.02016 |
| 494.6518          | 65.62264 | 66.11914 |
| 495.1339          | 65.6638  | 66.22295 |
| 495.616           | 65.70629 | 66.32947 |
| 496.0981          | 65.74739 | 66.43469 |
| 496.5803          | 65.7876  | 66.53932 |
| 497.0624          | 65.82668 | 66.64298 |
| 497.5445          | 65.86423 | 66.74481 |
| 498.0266          | 65.90058 | 66.8448  |
| 498.5087          | 65.93332 | 66.94015 |
| 498.9908          | 65.96027 | 67.02817 |
| 499.473           | 65.98109 | 67.10841 |
| 499.9551          | 65.99616 | 67.18141 |
| 500.4372          | 66.00117 | 67.24157 |
| 500.9193          | 65.99405 | 67.28619 |
| 501.4014          | 65.96853 | 67.30727 |
| 501.8835          | 65.91406 | 67.29144 |
| 502.3657          | 65.84145 | 67.25228 |
| 502.8478          | 65.75716 | 67.19793 |
| 503.3299          | 65.66364 | 67.13141 |
| 503.812           | 65.5657  | 67.05858 |
| 504.2941          | 65.46279 | 66.97889 |
| 504.7762          | 65.35537 | 66.89292 |
| 505.2584          | 65.24523 | 66.8032  |
| 505.7405          | 65.13386 | 66.71205 |
| 506.2226          | 65.02268 | 66.62056 |
| 506.7047          | 64.9135  | 66.53037 |

| Wavenumber (cm-1) | After    | Before   |
|-------------------|----------|----------|
| 507.1868          | 64.80676 | 66.44205 |
| 507.6689          | 64.70194 | 66.35495 |
| 508.1511          | 64.60381 | 66.27425 |
| 508.6332          | 64.51485 | 66.20264 |
| 509.1153          | 64.44151 | 66.14689 |
| 509.5974          | 64.39456 | 66.1182  |
| 510.0795          | 64.36349 | 66.10586 |
| 510.5616          | 64.34206 | 66.10359 |
| 511.0438          | 64.32812 | 66.10938 |
| 511.5259          | 64.31738 | 66.11901 |
| 512.008           | 64.31027 | 66.13293 |
| 512.4901          | 64.3065  | 66.1509  |
| 512.9722          | 64.304   | 66.17074 |
| 513.4543          | 64.30061 | 66.18998 |
| 513.9365          | 64.29633 | 66.20927 |
| 514.4186          | 64.29059 | 66.22843 |
| 514.9007          | 64.2831  | 66.24736 |
| 515.3828          | 64.27448 | 66.26669 |
| 515.8649          | 64.26161 | 66.28394 |
| 516.347           | 64.24288 | 66.29778 |
| 516.8292          | 64.21445 | 66.30531 |
| 517.3113          | 64.16989 | 66.30165 |
| 517.7934          | 64.11532 | 66.29141 |
| 518.2755          | 64.05437 | 66.27732 |
| 518.7576          | 63.98813 | 66.26022 |
| 519.2397          | 63.919   | 66.2419  |
| 519.7219          | 63.84679 | 66.22218 |
| 520.204           | 63.77166 | 66.20113 |
| 520.6861          | 63.695   | 66.17969 |
| 521.1682          | 63.61846 | 66.15893 |
| 521.6503          | 63.54136 | 66.13854 |
| 522.1324          | 63.46355 | 66.11851 |
| 522.6146          | 63.3851  | 66.09892 |
| 523.0967          | 63.30569 | 66.07943 |
| 523.5788          | 63.22639 | 66.06111 |
| 524.0609          | 63.1478  | 66.04447 |
| 524.543           | 63.07097 | 66.03071 |
| 525.0251          | 62.99763 | 66.02181 |
| 525.5073          | 62.92634 | 66.01586 |
| 525.9894          | 62.85628 | 66.01174 |
| 526.4715          | 62.78729 | 66.0091  |
| 526.9536          | 62.71891 | 66.00721 |
| 527.4357          | 62.65123 | 66.00611 |
| 527.9178          | 62.5843  | 66.00575 |
| 528.4             | 62.5178  | 66.00568 |
| 528.8821          | 62.4512  | 66.00535 |
| 529.3642          | 62.38504 | 66.00503 |
| 529.8463          | 62.31961 | 66.00475 |
| 530.3284          | 62.25501 | 66.00452 |
| 530.8105          | 62.19136 | 66.00441 |
| 531.2927          | 62.12878 | 66.00413 |
| 531.7748          | 62.06733 | 66.0035  |
| 532.2569          | 62.00726 | 66.00227 |
| 532.739           | 61.94897 | 66.00001 |
| 533.2211          | 61.89211 | 65.997   |

| Wavenumber (cm-1) | After    | Before   |
|-------------------|----------|----------|
| 533.7032          | 61.83645 | 65.99346 |
| 534.1854          | 61.78198 | 65.98942 |
| 534.6675          | 61.72867 | 65.98503 |
| 535.1496          | 61.67636 | 65.98013 |
| 535.6317          | 61.62503 | 65.97468 |
| 536.1138          | 61.57435 | 65.96851 |
| 536.5959          | 61.52377 | 65.96143 |
| 537.0781          | 61.47393 | 65.95371 |
| 537.5602          | 61.42529 | 65.94557 |
| 538.0423          | 61.37785 | 65.93697 |
| 538.5244          | 61.33153 | 65.92779 |
| 539.0065          | 61.28696 | 65.91848 |
| 539.4886          | 61.24441 | 65.9092  |
| 539.9708          | 61.20492 | 65.9007  |
| 540.4529          | 61.17037 | 65.8943  |
| 540.935           | 61.13864 | 65.88844 |
| 541.4171          | 61.10844 | 65.88216 |
| 541.8992          | 61.07915 | 65.87496 |
| 542.3813          | 61.04961 | 65.86594 |
| 542.8635          | 61.02007 | 65.85532 |
| 543.3456          | 60.99042 | 65.84302 |
| 543.8277          | 60.96062 | 65.82903 |
| 544.3098          | 60.931   | 65.81378 |
| 544.7919          | 60.90026 | 65.79605 |
| 545.274           | 60.86727 | 65.77485 |
| 545.7562          | 60.83186 | 65.75002 |
| 546.2383          | 60.79418 | 65.72169 |
| 546.7204          | 60.75217 | 65.68807 |
| 547.2025          | 60.70481 | 65.64831 |
| 547.6846          | 60.64902 | 65.59972 |
| 548.1667          | 60.5796  | 65.5378  |
| 548.6489          | 60.50191 | 65.4672  |
| 549.131           | 60.41917 | 65.39076 |
| 549.6131          | 60.3326  | 65.30949 |
| 550.0952          | 60.24446 | 65.22536 |
| 550.5773          | 60.15468 | 65.13837 |
| 551.0594          | 60.06353 | 65.04881 |
| 551.5416          | 59.97215 | 64.95783 |
| 552.0237          | 59.88168 | 64.86674 |
| 552.5058          | 59.79233 | 64.77534 |
| 552.9879          | 59.70461 | 64.68381 |
| 553.47            | 59.61877 | 64.59239 |
| 553.9521          | 59.53466 | 64.501   |
| 554.4343          | 59.45405 | 64.41079 |
| 554.9164          | 59.3779  | 64.32243 |
| 555.3985          | 59.30843 | 64.23712 |
| 555.8806          | 59.24921 | 64.15678 |
| 556.3627          | 59.19707 | 64.08002 |
| 556.8448          | 59.15012 | 64.00609 |
| 557.327           | 59.10796 | 63.93502 |
| 557.8091          | 59.06952 | 63.86658 |
| 558.2912          | 59.03482 | 63.80075 |
| 558.7733          | 59.00385 | 63.73763 |
| 559.2554          | 58.97573 | 63.67663 |
| 559.7375          | 58.94921 | 63.61674 |

| Wavenumber (cm-1) | After    | Before   |
|-------------------|----------|----------|
| 560.2197          | 58.92538 | 63.5594  |
| 560.7018          | 58.9049  | 63.50566 |
| 561.1839          | 58.88783 | 63.4557  |
| 561.666           | 58.87433 | 63.40964 |
| 562.1481          | 58.86468 | 63.36865 |
| 562.6302          | 58.85894 | 63.33329 |
| 563.1124          | 58.85783 | 63.30553 |
| 563.5945          | 58.86253 | 63.2886  |
| 564.0766          | 58.87166 | 63.27916 |
| 564.5587          | 58.88435 | 63.2752  |
| 565.0408          | 58.90024 | 63.27598 |
| 565.5229          | 58.91867 | 63.28011 |
| 566.0051          | 58.93962 | 63.28759 |
| 566.4872          | 58.96294 | 63.29821 |
| 566.9693          | 58.9883  | 63.31117 |
| 567.4514          | 59.01537 | 63.32553 |
| 567.9335          | 59.04398 | 63.34143 |
| 568.4156          | 59.0739  | 63.35877 |
| 568.8978          | 59.10499 | 63.37737 |
| 569.3799          | 59.13723 | 63.39731 |
| 569.862           | 59.17004 | 63.41778 |
| 570.3441          | 59.2031  | 63.4383  |
| 570.8262          | 59.2357  | 63.45803 |
| 571.3083          | 59.26675 | 63.47563 |
| 571.7905          | 59.29712 | 63.49208 |
| 572.2726          | 59.3273  | 63.5079  |
| 572.7547          | 59.35733 | 63.52309 |
| 573.2368          | 59.38741 | 63.53788 |
| 573.7189          | 59.41756 | 63.55221 |
| 574.201           | 59.44775 | 63.56595 |
| 574.6832          | 59.47831 | 63.57939 |
| 575.1653          | 59.50983 | 63.59297 |
| 575.6474          | 59.54158 | 63.60603 |
| 576.1295          | 59.57308 | 63.61809 |
| 576.6116          | 59.60426 | 63.62903 |
| 577.0938          | 59.63507 | 63.6387  |
| 577.5759          | 59.66499 | 63.64668 |
| 578.058           | 59.69378 | 63.65274 |
| 578.5401          | 59.72056 | 63.6562  |
| 579.0222          | 59.74381 | 63.65592 |
| 579.5043          | 59.76513 | 63.65294 |
| 579.9865          | 59.78547 | 63.64786 |
| 580.4686          | 59.80525 | 63.64088 |
| 580.9507          | 59.82523 | 63.63242 |
| 581.4328          | 59.84527 | 63.62238 |
| 581.9149          | 59.86543 | 63.61078 |
| 582.397           | 59.88586 | 63.59778 |
| 582.8792          | 59.90656 | 63.58353 |
| 583.3613          | 59.92807 | 63.56805 |
| 583.8434          | 59.95093 | 63.55139 |
| 584.3255          | 59.97522 | 63.53355 |
| 584.8076          | 60.00084 | 63.51443 |
| 585.2897          | 60.02889 | 63.49436 |
| 585.7719          | 60.0599  | 63.47349 |
| 586.254           | 60.09547 | 63.45223 |

| Wavenumber (cm-1) | After    | Before   |
|-------------------|----------|----------|
| 586.7361          | 60.13828 | 63.43133 |
| 587.2182          | 60.18559 | 63.41002 |
| 587.7003          | 60.23576 | 63.38782 |
| 588.1824          | 60.28816 | 63.36453 |
| 588.6646          | 60.34164 | 63.33972 |
| 589.1467          | 60.39625 | 63.31354 |
| 589.6288          | 60.45188 | 63.28597 |
| 590.1109          | 60.50799 | 63.25707 |
| 590.593           | 60.56404 | 63.22704 |
| 591.0751          | 60.61989 | 63.19534 |
| 591.5573          | 60.67522 | 63.16151 |
| 592.0394          | 60.72992 | 63.12553 |
| 592.5215          | 60.78409 | 63.08748 |
| 593.0036          | 60.83674 | 63.04654 |
| 593.4857          | 60.88737 | 63.0023  |
| 593.9678          | 60.93471 | 62.95348 |
| 594.45            | 60.97671 | 62.8979  |
| 594.9321          | 61.01529 | 62.8379  |
| 595.4142          | 61.05155 | 62.7749  |
| 595.8963          | 61.08582 | 62.70942 |
| 596.3784          | 61.11879 | 62.64246 |
| 596.8605          | 61.15043 | 62.57409 |
| 597.3427          | 61.18076 | 62.50449 |
| 597.8248          | 61.21022 | 62.43429 |
| 598.3069          | 61.2394  | 62.36423 |
| 598.789           | 61.26795 | 62.29419 |
| 599.2711          | 61.29571 | 62.22421 |
| 599.7532          | 61.3227  | 62.15445 |
| 600.2354          | 61.34879 | 62.08492 |
| 600.7175          | 61.37417 | 62.01611 |
| 601.1996          | 61.39895 | 61.94837 |
| 601.6817          | 61.42326 | 61.88215 |
| 602.1638          | 61.44725 | 61.81814 |
| 602.6459          | 61.47085 | 61.75603 |
| 603.1281          | 61.494   | 61.69569 |
| 603.6102          | 61.51672 | 61.63722 |
| 604.0923          | 61.539   | 61.58061 |
| 604.5744          | 61.56086 | 61.52602 |
| 605.0565          | 61.58235 | 61.4736  |
| 605.5386          | 61.60345 | 61.42335 |
| 606.0208          | 61.62415 | 61.37521 |
| 606.5029          | 61.64452 | 61.32955 |
| 606.985           | 61.66464 | 61.28663 |
| 607.4671          | 61.68453 | 61.24662 |
| 607.9492          | 61.70423 | 61.20969 |
| 608.4313          | 61.72379 | 61.17608 |
| 608.9135          | 61.74326 | 61.14599 |
| 609.3956          | 61.76268 | 61.11974 |
| 609.8777          | 61.78217 | 61.09778 |
| 610.3598          | 61.8017  | 61.07993 |
| 610.8419          | 61.82123 | 61.06609 |
| 611.324           | 61.84077 | 61.05639 |
| 611.8062          | 61.86027 | 61.05093 |
| 612.2883          | 61.87984 | 61.04967 |
| 612.7704          | 61.89952 | 61.05267 |

| Wavenumber (cm-1) | After    | Before   |
|-------------------|----------|----------|
| 613.2525          | 61.91946 | 61.05976 |
| 613.7346          | 61.9399  | 61.07051 |
| 614.2167          | 61.96056 | 61.08565 |
| 614.6989          | 61.98125 | 61.10577 |
| 615.181           | 62.002   | 61.13097 |
| 615.6631          | 62.0229  | 61.1613  |
| 616.1452          | 62.04359 | 61.1975  |
| 616.6273          | 62.06398 | 61.23995 |
| 617.1094          | 62.08348 | 61.28984 |
| 617.5916          | 62.1011  | 61.34918 |
| 618.0737          | 62.11802 | 61.41592 |
| 618.5558          | 62.13498 | 61.48885 |
| 619.0379          | 62.1523  | 61.56759 |
| 619.52            | 62.17052 | 61.65133 |
| 620.0021          | 62.1897  | 61.74001 |
| 620.4843          | 62.20999 | 61.8335  |
| 620.9664          | 62.23175 | 61.93117 |
| 621.4485          | 62.25534 | 62.03224 |
| 621.9306          | 62.2808  | 62.13711 |
| 622.4127          | 62.30824 | 62.246   |
| 622.8948          | 62.3378  | 62.35877 |
| 623.377           | 62.36951 | 62.47543 |
| 623.8591          | 62.40374 | 62.59591 |
| 624.3412          | 62.4407  | 62.72004 |
| 624.8233          | 62.48077 | 62.84794 |
| 625.3054          | 62.52445 | 62.97987 |
| 625.7875          | 62.57149 | 63.11523 |
| 626.2697          | 62.62177 | 63.25361 |
| 626.7518          | 62.67545 | 63.39476 |
| 627.2339          | 62.73265 | 63.53832 |
| 627.716           | 62.79325 | 63.68416 |
| 628.1981          | 62.85728 | 63.8321  |
| 628.6802          | 62.92439 | 63.98195 |
| 629.1624          | 62.99384 | 64.13352 |
| 629.6445          | 63.06676 | 64.28654 |
| 630.1266          | 63.14404 | 64.44074 |
| 630.6087          | 63.22576 | 64.59594 |
| 631.0908          | 63.31189 | 64.75202 |
| 631.5729          | 63.40366 | 64.90856 |
| 632.0551          | 63.50159 | 65.06528 |
| 632.5372          | 63.60762 | 65.22167 |
| 633.0193          | 63.72501 | 65.37698 |
| 633.5014          | 63.85029 | 65.53164 |
| 633.9835          | 63.98138 | 65.68588 |
| 634.4656          | 64.11745 | 65.83962 |
| 634.9478          | 64.25701 | 65.99288 |
| 635.4299          | 64.40006 | 66.14564 |
| 635.912           | 64.54638 | 66.29781 |
| 636.3941          | 64.6952  | 66.44961 |
| 636.8762          | 64.84572 | 66.60148 |
| 637.3583          | 64.99776 | 66.75268 |
| 637.8405          | 65.15101 | 66.90265 |
| 638.3226          | 65.30521 | 67.05128 |
| 638.8047          | 65.46043 | 67.19849 |
| 639.2868          | 65.6155  | 67.3436  |

| Wavenumber (cm-1) | After    | Before   |
|-------------------|----------|----------|
| 639.7689          | 65.76978 | 67.48629 |
| 640.251           | 65.92182 | 67.6255  |
| 640.7332          | 66.06936 | 67.75947 |
| 641.2153          | 66.21432 | 67.88993 |
| 641.6974          | 66.3578  | 68.01794 |
| 642.1795          | 66.50002 | 68.14384 |
| 642.6616          | 66.6416  | 68.26836 |
| 643.1437          | 66.78245 | 68.39144 |
| 643.6259          | 66.92251 | 68.51314 |
| 644.108           | 67.06223 | 68.63381 |
| 644.5901          | 67.20231 | 68.75381 |
| 645.0722          | 67.34206 | 68.87316 |
| 645.5543          | 67.48109 | 68.99197 |
| 646.0364          | 67.61932 | 69.11032 |
| 646.5186          | 67.75656 | 69.2281  |
| 647.0007          | 67.89269 | 69.34584 |
| 647.4828          | 68.02763 | 69.46384 |
| 647.9649          | 68.16106 | 69.58275 |
| 648.447           | 68.29243 | 69.70368 |
| 648.9291          | 68.42225 | 69.82559 |
| 649.4113          | 68.55082 | 69.94789 |
| 649.8934          | 68.67825 | 70.0704  |
| 650.3755          | 68.80474 | 70.19269 |
| 650.8576          | 68.93027 | 70.31484 |
| 651.3397          | 69.05486 | 70.43684 |
| 651.8218          | 69.1786  | 70.55854 |
| 652.304           | 69.30164 | 70.67978 |
| 652.7861          | 69.4239  | 70.80055 |
| 653.2682          | 69.54543 | 70.92075 |
| 653.7503          | 69.66622 | 71.04042 |
| 654.2324          | 69.78623 | 71.15962 |
| 654.7145          | 69.90559 | 71.278   |
| 655.1967          | 70.02435 | 71.39542 |
| 655.6788          | 70.14265 | 71.51145 |
| 656.1609          | 70.2607  | 71.62528 |
| 656.6431          | 70.3783  | 71.73774 |
| 657.1251          | 70.49532 | 71.84931 |
| 657.6073          | 70.61176 | 71.96018 |
| 658.0894          | 70.72751 | 72.07079 |
| 658.5715          | 70.84261 | 72.18102 |
| 659.0536          | 70.95703 | 72.2909  |
| 659.5358          | 71.07076 | 72.40044 |
| 660.0178          | 71.18372 | 72.50958 |
| 660.5             | 71.29596 | 72.61868 |
| 660.9821          | 71.40747 | 72.72809 |
| 661.4642          | 71.51825 | 72.83785 |
| 661.9463          | 71.62832 | 72.94787 |
| 662.4285          | 71.73763 | 73.05885 |
| 662.9105          | 71.84617 | 73.17109 |
| 663.3927          | 71.9539  | 73.28559 |
| 663.8748          | 72.06075 | 73.40405 |
| 664.3569          | 72.16678 | 73.52469 |
| 664.839           | 72.27203 | 73.64643 |
| 665.3212          | 72.37653 | 73.76888 |
| 665.8032          | 72.48037 | 73.89124 |

| Wavenumber (cm-1) | After    | Before   |
|-------------------|----------|----------|
| 666.2854          | 72.58347 | 74.01354 |
| 666.7675          | 72.68583 | 74.13568 |
| 667.2496          | 72.78734 | 74.25729 |
| 667.7317          | 72.88786 | 74.37801 |
| 668.2139          | 72.98763 | 74.49772 |
| 668.6959          | 73.0868  | 74.6162  |
| 669.1781          | 73.18537 | 74.73336 |
| 669.6602          | 73.28332 | 74.84925 |
| 670.1423          | 73.38091 | 74.96321 |
| 670.6244          | 73.47826 | 75.0749  |
| 671.1066          | 73.57582 | 75.1835  |
| 671.5886          | 73.6744  | 75.28768 |
| 672.0708          | 73.77312 | 75.38863 |
| 672.5529          | 73.87142 | 75.48703 |
| 673.035           | 73.96905 | 75.58305 |
| 673.5171          | 74.06548 | 75.67703 |
| 673.9993          | 74.1609  | 75.76901 |
| 674.4813          | 74.25524 | 75.85906 |
| 674.9635          | 74.34857 | 75.94758 |
| 675.4456          | 74.44115 | 76.03524 |
| 675.9277          | 74.53229 | 76.12139 |
| 676.4098          | 74.62141 | 76.20561 |
| 676.892           | 74.70845 | 76.28789 |
| 677.374           | 74.7935  | 76.36819 |
| 677.8562          | 74.87553 | 76.44613 |
| 678.3383          | 74.95406 | 76.52158 |
| 678.8204          | 75.02752 | 76.59381 |
| 679.3025          | 75.09322 | 76.66155 |
| 679.7847          | 75.15401 | 76.72624 |
| 680.2667          | 75.21156 | 76.7888  |
| 680.7489          | 75.26653 | 76.84958 |
| 681.231           | 75.32005 | 76.90921 |
| 681.7131          | 75.37221 | 76.9678  |
| 682.1952          | 75.4232  | 77.02552 |
| 682.6774          | 75.47379 | 77.08285 |
| 683.1594          | 75.52488 | 77.14034 |
| 683.6416          | 75.57626 | 77.19785 |
| 684.1237          | 75.62798 | 77.25541 |
| 684.6058          | 75.68017 | 77.31316 |
| 685.0879          | 75.73287 | 77.37118 |
| 685.5701          | 75.78662 | 77.42968 |
| 686.0521          | 75.8418  | 77.48888 |
| 686.5343          | 75.89892 | 77.54894 |
| 687.0164          | 75.95872 | 77.60997 |
| 687.4985          | 76.0209  | 77.67222 |
| 687.9806          | 76.08527 | 77.73585 |
| 688.4628          | 76.15205 | 77.80112 |
| 688.9448          | 76.22139 | 77.86839 |
| 689.427           | 76.2932  | 77.93758 |
| 689.9091          | 76.36759 | 78.00878 |
| 690.3912          | 76.44419 | 78.08178 |
| 690.8733          | 76.52225 | 78.156   |
| 691.3555          | 76.60309 | 78.2326  |
| 691.8375          | 76.68765 | 78.31249 |
| 692.3197          | 76.77612 | 78.39582 |



| Wavenumber (cm-1) | After    | Before   |
|-------------------|----------|----------|
| 692.8018          | 76.86855 | 78.48261 |
| 693.2839          | 76.96623 | 78.5742  |
| 693.766           | 77.06981 | 78.67122 |
| 694.2482          | 77.18137 | 78.77573 |
| 694.7302          | 77.3044  | 78.89118 |
| 695.2124          | 77.4353  | 79.01405 |
| 695.6945          | 77.57193 | 79.14222 |
| 696.1766          | 77.71352 | 79.27496 |
| 696.6587          | 77.85857 | 79.41079 |
| 697.1409          | 78.00708 | 79.54973 |
| 697.6229          | 78.15883 | 79.69158 |
| 698.1051          | 78.31293 | 79.83547 |
| 698.5872          | 78.46838 | 79.98043 |
| 699.0693          | 78.62536 | 80.12666 |
| 699.5514          | 78.78378 | 80.27405 |
| 700.0336          | 78.94344 | 80.42244 |
| 700.5156          | 79.10443 | 80.57191 |
| 700.9978          | 79.26595 | 80.72165 |
| 701.4799          | 79.42745 | 80.87118 |
| 701.962           | 79.58813 | 81.01962 |
| 702.4441          | 79.74661 | 81.16566 |
| 702.9263          | 79.90388 | 81.31025 |
| 703.4083          | 80.06041 | 81.45396 |
| 703.8905          | 80.21617 | 81.59676 |
| 704.3726          | 80.37133 | 81.73882 |
| 704.8547          | 80.52586 | 81.88017 |
| 705.3368          | 80.67967 | 82.02075 |
| 705.819           | 80.83314 | 82.16096 |
| 706.301           | 80.98691 | 82.30149 |
| 706.7832          | 81.14002 | 82.44136 |
| 707.2653          | 81.29177 | 82.57986 |
| 707.7474          | 81.442   | 82.71687 |
| 708.2295          | 81.59062 | 82.85228 |
| 708.7117          | 81.73685 | 82.98531 |
| 709.1937          | 81.88033 | 83.11559 |
| 709.6759          | 82.01977 | 83.24178 |
| 710.158           | 82.15308 | 83.36168 |
| 710.6401          | 82.28236 | 83.47757 |
| 711.1222          | 82.40887 | 83.59081 |
| 711.6044          | 82.53308 | 83.70191 |
| 712.0864          | 82.65582 | 83.81185 |
| 712.5686          | 82.77706 | 83.92059 |
| 713.0507          | 82.89696 | 84.02823 |
| 713.5328          | 83.016   | 84.13523 |
| 714.0149          | 83.13482 | 84.24207 |
| 714.4971          | 83.25322 | 84.34886 |
| 714.9791          | 83.37123 | 84.45585 |
| 715.4613          | 83.4889  | 84.56313 |
| 715.9434          | 83.6062  | 84.67066 |
| 716.4255          | 83.72354 | 84.77918 |
| 716.9076          | 83.84116 | 84.88915 |
| 717.3898          | 83.95948 | 85.00158 |
| 717.8718          | 84.07912 | 85.1181  |
| 718.354           | 84.19964 | 85.2372  |
| 718.8361          | 84.32085 | 85.35803 |

| Wavenumber (cm-1) | After    | Before   |
|-------------------|----------|----------|
| 719.3182          | 84.44277 | 85.48038 |
| 719.8003          | 84.56541 | 85.60374 |
| 720.2825          | 84.68872 | 85.7281  |
| 720.7645          | 84.81271 | 85.85345 |
| 721.2467          | 84.93713 | 85.97933 |
| 721.7288          | 85.0615  | 86.1051  |
| 722.2109          | 85.18652 | 86.23132 |
| 722.693           | 85.31274 | 86.3583  |
| 723.1752          | 85.44023 | 86.48605 |
| 723.6572          | 85.56899 | 86.61464 |
| 724.1394          | 85.69973 | 86.74423 |
| 724.6215          | 85.83273 | 86.87486 |
| 725.1036          | 85.96911 | 87.00691 |
| 725.5857          | 86.11069 | 87.14114 |
| 726.0679          | 86.25557 | 87.27667 |
| 726.5499          | 86.40254 | 87.41297 |
| 727.0321          | 86.55116 | 87.54979 |
| 727.5142          | 86.70059 | 87.68671 |
| 727.9963          | 86.85084 | 87.82373 |
| 728.4784          | 87.00179 | 87.96078 |
| 728.9606          | 87.15302 | 88.0977  |
| 729.4426          | 87.30409 | 88.23448 |
| 729.9248          | 87.45493 | 88.37076 |
| 730.4069          | 87.60532 | 88.50626 |
| 730.889           | 87.75514 | 88.64089 |
| 731.3711          | 87.90446 | 88.77465 |
| 731.8533          | 88.05259 | 88.90696 |
| 732.3353          | 88.19919 | 89.03751 |
| 732.8175          | 88.34344 | 89.16549 |
| 733.2996          | 88.48404 | 89.28958 |
| 733.7817          | 88.6221  | 89.41103 |
| 734.2638          | 88.7583  | 89.53056 |
| 734.746           | 88.89275 | 89.6484  |
| 735.228           | 89.0258  | 89.76505 |
| 735.7102          | 89.15746 | 89.88043 |
| 736.1923          | 89.28768 | 89.99457 |
| 736.6744          | 89.41679 | 90.10772 |
| 737.1565          | 89.54523 | 90.22016 |
| 737.6387          | 89.67256 | 90.33182 |
| 738.1207          | 89.79853 | 90.44269 |
| 738.6029          | 89.92307 | 90.55277 |
| 739.085           | 90.04614 | 90.662   |
| 739.5671          | 90.16759 | 90.77062 |
| 740.0492          | 90.28736 | 90.87882 |
| 740.5314          | 90.40515 | 90.98689 |
| 741.0134          | 90.52045 | 91.09538 |
| 741.4956          | 90.63381 | 91.20377 |
| 741.9777          | 90.74556 | 91.31175 |
| 742.4598          | 90.85583 | 91.41919 |
| 742.9419          | 90.9649  | 91.52587 |
| 743.4241          | 91.07272 | 91.63184 |
| 743.9061          | 91.17934 | 91.73708 |
| 744.3883          | 91.28483 | 91.84152 |
| 744.8704          | 91.38922 | 91.9451  |
| 745.3525          | 91.49268 | 92.04776 |

| Wavenumber (cm-1) | After    | Before   |
|-------------------|----------|----------|
| 745.8346          | 91.59531 | 92.14942 |
| 746.3168          | 91.69718 | 92.25008 |
| 746.7988          | 91.79826 | 92.34978 |
| 747.281           | 91.89885 | 92.44828 |
| 747.7631          | 91.99913 | 92.54546 |
| 748.2452          | 92.09952 | 92.64104 |
| 748.7273          | 92.20074 | 92.73446 |
| 749.2095          | 92.30208 | 92.82627 |
| 749.6915          | 92.40312 | 92.91682 |
| 750.1737          | 92.50375 | 93.0062  |
| 750.6558          | 92.60363 | 93.09467 |
| 751.1379          | 92.70284 | 93.18222 |
| 751.62            | 92.80132 | 93.26887 |
| 752.1022          | 92.89894 | 93.35473 |
| 752.5842          | 92.99557 | 93.43989 |
| 753.0664          | 93.0912  | 93.52439 |
| 753.5485          | 93.18578 | 93.60832 |
| 754.0306          | 93.2793  | 93.69169 |
| 754.5127          | 93.37181 | 93.77448 |
| 754.9949          | 93.46307 | 93.85692 |
| 755.4769          | 93.55299 | 93.93911 |
| 755.9591          | 93.64128 | 94.02133 |
| 756.4412          | 93.72752 | 94.10403 |
| 756.9233          | 93.81215 | 94.18679 |
| 757.4054          | 93.89537 | 94.26934 |
| 757.8876          | 93.9773  | 94.35165 |
| 758.3696          | 94.05819 | 94.43358 |
| 758.8518          | 94.13789 | 94.51507 |
| 759.3339          | 94.21642 | 94.59609 |
| 759.816           | 94.2937  | 94.67644 |
| 760.2981          | 94.36957 | 94.7558  |
| 760.7803          | 94.44433 | 94.83449 |
| 761.2623          | 94.51826 | 94.91272 |
| 761.7445          | 94.59136 | 94.99049 |
| 762.2266          | 94.66354 | 95.06777 |
| 762.7087          | 94.73531 | 95.14478 |
| 763.1908          | 94.80686 | 95.22164 |
| 763.673           | 94.87897 | 95.29878 |
| 764.155           | 94.95299 | 95.37695 |
| 764.6372          | 95.02744 | 95.45526 |
| 765.1193          | 95.10141 | 95.53318 |
| 765.6014          | 95.17448 | 95.61038 |
| 766.0835          | 95.2458  | 95.6863  |
| 766.5657          | 95.31566 | 95.76116 |
| 767.0477          | 95.384   | 95.83495 |
| 767.5299          | 95.45091 | 95.90783 |
| 768.012           | 95.51685 | 95.98026 |
| 768.4941          | 95.58068 | 96.05127 |
| 768.9762          | 95.64142 | 96.11999 |
| 769.4584          | 95.69897 | 96.18636 |
| 769.9404          | 95.75352 | 96.25051 |
| 770.4226          | 95.80331 | 96.31104 |
| 770.9047          | 95.84755 | 96.36728 |
| 771.3868          | 95.88359 | 96.41705 |
| 771.8689          | 95.90692 | 96.45664 |

| Wavenumber (cm-1) | After    | Before   |
|-------------------|----------|----------|
| 772.3511          | 95.92232 | 96.49    |
| 772.8331          | 95.93263 | 96.51952 |
| 773.3153          | 95.93907 | 96.54626 |
| 773.7974          | 95.94387 | 96.57212 |
| 774.2795          | 95.94673 | 96.59678 |
| 774.7616          | 95.94787 | 96.62042 |
| 775.2438          | 95.9479  | 96.6434  |
| 775.7258          | 95.94706 | 96.6657  |
| 776.208           | 95.94666 | 96.68875 |
| 776.6901          | 95.948   | 96.71387 |
| 777.1722          | 95.95133 | 96.74129 |
| 777.6543          | 95.95641 | 96.77076 |
| 778.1365          | 95.96605 | 96.80502 |
| 778.6185          | 95.98169 | 96.84542 |
| 779.1007          | 96.00735 | 96.89593 |
| 779.5828          | 96.04973 | 96.96324 |
| 780.0649          | 96.1021  | 97.04055 |
| 780.547           | 96.16049 | 97.1238  |
| 781.0292          | 96.22345 | 97.21145 |
| 781.5112          | 96.28812 | 97.30051 |
| 781.9934          | 96.3548  | 97.39134 |
| 782.4755          | 96.42324 | 97.48364 |
| 782.9576          | 96.49223 | 97.57631 |
| 783.4397          | 96.56059 | 97.66843 |
| 783.9219          | 96.62791 | 97.75912 |
| 784.4039          | 96.69346 | 97.84728 |
| 784.8861          | 96.757   | 97.93268 |
| 785.3682          | 96.81889 | 98.01565 |
| 785.8503          | 96.87669 | 98.09321 |
| 786.3324          | 96.92911 | 98.16386 |
| 786.8146          | 96.97298 | 98.2236  |
| 787.2966          | 97.00297 | 98.26573 |
| 787.7788          | 97.0242  | 98.29682 |
| 788.2609          | 97.03975 | 98.32078 |
| 788.743           | 97.05055 | 98.33888 |
| 789.2251          | 97.05853 | 98.35376 |
| 789.7073          | 97.06371 | 98.36527 |
| 790.1893          | 97.06625 | 98.37365 |
| 790.6715          | 97.06756 | 98.3804  |
| 791.1536          | 97.06934 | 98.38724 |
| 791.6357          | 97.07066 | 98.3937  |
| 792.1178          | 97.07111 | 98.39983 |
| 792.6             | 97.07077 | 98.40579 |
| 793.082           | 97.0695  | 98.41131 |
| 793.5642          | 97.06773 | 98.41781 |
| 794.0463          | 97.06578 | 98.42608 |
| 794.5284          | 97.06378 | 98.43762 |
| 795.0105          | 97.0618  | 98.45487 |
| 795.4927          | 97.06025 | 98.47583 |
| 795.9747          | 97.05942 | 98.49932 |
| 796.4569          | 97.05972 | 98.52518 |
| 796.939           | 97.06174 | 98.55291 |
| 797.4211          | 97.06527 | 98.58242 |
| 797.9032          | 97.07043 | 98.61369 |
| 798.3854          | 97.07684 | 98.64591 |

| Wavenumber (cm-1) | After    | Before    |
|-------------------|----------|-----------|
| 798.8674          | 97.08353 | 98.67774  |
| 799.3496          | 97.09235 | 98.71074  |
| 799.8317          | 97.10477 | 98.746    |
| 800.3138          | 97.12096 | 98.78359  |
| 800.7959          | 97.1409  | 98.8236   |
| 801.2781          | 97.16675 | 98.86718  |
| 801.7601          | 97.19954 | 98.9148   |
| 802.2423          | 97.24261 | 98.96851  |
| 802.7244          | 97.30163 | 99.03169  |
| 803.2065          | 97.37072 | 99.10059  |
| 803.6886          | 97.44637 | 99.173    |
| 804.1708          | 97.52722 | 99.24794  |
| 804.6528          | 97.61073 | 99.32368  |
| 805.135           | 97.69705 | 99.40029  |
| 805.6171          | 97.78586 | 99.47756  |
| 806.0992          | 97.87601 | 99.5548   |
| 806.5813          | 97.96635 | 99.6315   |
| 807.0635          | 98.05645 | 99.70693  |
| 807.5455          | 98.1456  | 99.78032  |
| 808.0277          | 98.23351 | 99.85139  |
| 808.5098          | 98.32037 | 99.92022  |
| 808.9919          | 98.404   | 99.98496  |
| 809.474           | 98.48322 | 100.04463 |
| 809.9562          | 98.55526 | 100.09673 |
| 810.4382          | 98.61555 | 100.13712 |
| 810.9204          | 98.66828 | 100.16969 |
| 811.4025          | 98.71589 | 100.19668 |
| 811.8846          | 98.75904 | 100.21876 |
| 812.3668          | 98.79928 | 100.2374  |
| 812.8489          | 98.83645 | 100.25247 |
| 813.331           | 98.87061 | 100.26405 |
| 813.8131          | 98.90268 | 100.27303 |
| 814.2952          | 98.93392 | 100.2805  |
| 814.7773          | 98.96355 | 100.2859  |
| 815.2595          | 98.99124 | 100.28901 |
| 815.7416          | 99.01696 | 100.28986 |
| 816.2237          | 99.04044 | 100.28823 |
| 816.7058          | 99.06209 | 100.28461 |
| 817.1879          | 99.08215 | 100.27931 |
| 817.67            | 99.10092 | 100.27277 |
| 818.1522          | 99.11886 | 100.26567 |
| 818.6343          | 99.13559 | 100.25749 |
| 819.1164          | 99.15095 | 100.24792 |
| 819.5985          | 99.16488 | 100.23692 |
| 820.0806          | 99.17729 | 100.22431 |
| 820.5627          | 99.18824 | 100.21018 |
| 821.0449          | 99.19778 | 100.19459 |
| 821.527           | 99.20588 | 100.17747 |
| 822.0091          | 99.21252 | 100.15875 |
| 822.4912          | 99.21776 | 100.13852 |
| 822.9733          | 99.22159 | 100.11686 |
| 823.4554          | 99.22406 | 100.09383 |
| 823.9376          | 99.22524 | 100.06954 |
| 824.4197          | 99.22505 | 100.0439  |
| 824.9018          | 99.22345 | 100.01692 |

| Wavenumber (cm-1) | After    | Before   |
|-------------------|----------|----------|
| 825.3839          | 99.22033 | 99.98851 |
| 825.866           | 99.21539 | 99.95849 |
| 826.3481          | 99.20901 | 99.92716 |
| 826.8303          | 99.20145 | 99.89472 |
| 827.3124          | 99.19282 | 99.86128 |
| 827.7945          | 99.18333 | 99.82704 |
| 828.2766          | 99.173   | 99.79201 |
| 828.7587          | 99.16188 | 99.7562  |
| 829.2408          | 99.14999 | 99.71964 |
| 829.723           | 99.13734 | 99.68222 |
| 830.2051          | 99.12413 | 99.64426 |
| 830.6872          | 99.1106  | 99.60601 |
| 831.1693          | 99.09678 | 99.56756 |
| 831.6514          | 99.0827  | 99.52888 |
| 832.1335          | 99.0687  | 99.49042 |
| 832.6157          | 99.05496 | 99.45238 |
| 833.0978          | 99.04201 | 99.41538 |
| 833.5799          | 99.03069 | 99.3805  |
| 834.062           | 99.02018 | 99.34669 |
| 834.5441          | 99.01003 | 99.31333 |
| 835.0262          | 99.00009 | 99.28021 |
| 835.5084          | 98.99009 | 99.24696 |
| 835.9905          | 98.98002 | 99.21355 |
| 836.4726          | 98.96983 | 99.17994 |
| 836.9547          | 98.95928 | 99.14584 |
| 837.4368          | 98.94807 | 99.11091 |
| 837.9189          | 98.9364  | 99.07533 |
| 838.4011          | 98.92442 | 99.03912 |
| 838.8832          | 98.91211 | 99.0023  |
| 839.3653          | 98.89949 | 98.96488 |
| 839.8474          | 98.8866  | 98.92673 |
| 840.3295          | 98.87341 | 98.88777 |
| 840.8116          | 98.86008 | 98.84795 |
| 841.2938          | 98.84686 | 98.80721 |
| 841.7759          | 98.8334  | 98.7655  |
| 842.258           | 98.81946 | 98.72277 |
| 842.7401          | 98.80492 | 98.67896 |
| 843.2222          | 98.7896  | 98.634   |
| 843.7043          | 98.77348 | 98.58784 |
| 844.1865          | 98.7565  | 98.54044 |
| 844.6686          | 98.73857 | 98.49176 |
| 845.1507          | 98.71962 | 98.44178 |
| 845.6328          | 98.69955 | 98.3904  |
| 846.1149          | 98.67824 | 98.3375  |
| 846.597           | 98.65563 | 98.28307 |
| 847.0792          | 98.6317  | 98.22702 |
| 847.5613          | 98.60622 | 98.16926 |
| 848.0434          | 98.57909 | 98.1097  |
| 848.5255          | 98.55003 | 98.0482  |
| 849.0076          | 98.5186  | 97.98455 |
| 849.4897          | 98.48517 | 97.91885 |
| 849.9719          | 98.44989 | 97.85118 |
| 850.454           | 98.4128  | 97.7815  |
| 850.9361          | 98.37402 | 97.70982 |
| 851.4182          | 98.33349 | 97.63612 |

| Wavenumber (cm-1) | After    | Before   |
|-------------------|----------|----------|
| 851.9003          | 98.29121 | 97.56037 |
| 852.3824          | 98.24725 | 97.48266 |
| 852.8646          | 98.20176 | 97.40308 |
| 853.3467          | 98.15456 | 97.32142 |
| 853.8288          | 98.10555 | 97.23753 |
| 854.3109          | 98.0547  | 97.15136 |
| 854.793           | 98.002   | 97.06291 |
| 855.2751          | 97.94733 | 96.97195 |
| 855.7573          | 97.89069 | 96.87842 |
| 856.2394          | 97.83195 | 96.78199 |
| 856.7215          | 97.7709  | 96.68218 |
| 857.2036          | 97.70776 | 96.57946 |
| 857.6857          | 97.64258 | 96.47413 |
| 858.1678          | 97.57542 | 96.3663  |
| 858.65            | 97.5064  | 96.25616 |
| 859.1321          | 97.43543 | 96.14369 |
| 859.6142          | 97.3625  | 96.02888 |
| 860.0963          | 97.28757 | 95.91185 |
| 860.5784          | 97.21049 | 95.79267 |
| 861.0605          | 97.13147 | 95.67136 |
| 861.5427          | 97.05066 | 95.54797 |
| 862.0248          | 96.96806 | 95.4225  |
| 862.5069          | 96.8836  | 95.29494 |
| 862.989           | 96.79756 | 95.16543 |
| 863.4711          | 96.71006 | 95.03407 |
| 863.9532          | 96.62154 | 94.90109 |
| 864.4354          | 96.53274 | 94.76684 |
| 864.9175          | 96.44283 | 94.63097 |
| 865.3996          | 96.35126 | 94.49326 |
| 865.8817          | 96.25783 | 94.35364 |
| 866.3638          | 96.16212 | 94.21194 |
| 866.8459          | 96.06414 | 94.06818 |
| 867.3281          | 95.96383 | 93.92238 |
| 867.8102          | 95.86103 | 93.77447 |
| 868.2923          | 95.75565 | 93.62441 |
| 868.7744          | 95.64749 | 93.47215 |
| 869.2565          | 95.53633 | 93.31764 |
| 869.7386          | 95.42208 | 93.16087 |
| 870.2208          | 95.30479 | 93.00185 |
| 870.7029          | 95.18395 | 92.84045 |
| 871.185           | 95.05934 | 92.67657 |
| 871.6671          | 94.9303  | 92.51    |
| 872.1492          | 94.79579 | 92.34036 |
| 872.6313          | 94.65681 | 92.16802 |
| 873.1135          | 94.51392 | 91.99326 |
| 873.5956          | 94.36726 | 91.81608 |
| 874.0777          | 94.21706 | 91.63656 |
| 874.5598          | 94.06348 | 91.45485 |
| 875.0419          | 93.90661 | 91.27101 |
| 875.524           | 93.74695 | 91.08536 |
| 876.0062          | 93.5853  | 90.89843 |
| 876.4883          | 93.42083 | 90.70966 |
| 876.9704          | 93.25299 | 90.51865 |
| 877.4525          | 93.08179 | 90.32543 |
| 877.9346          | 92.9073  | 90.13007 |

| Wavenumber (cm-1) | After    | Before   |
|-------------------|----------|----------|
| 878.4167          | 92.72884 | 89.93204 |
| 878.8989          | 92.54617 | 89.73111 |
| 879.381           | 92.35811 | 89.52634 |
| 879.8631          | 92.16257 | 89.31602 |
| 880.3452          | 91.96198 | 89.10214 |
| 880.8273          | 91.75783 | 88.88592 |
| 881.3094          | 91.55077 | 88.66788 |
| 881.7916          | 91.34184 | 88.44885 |
| 882.2737          | 91.13125 | 88.22903 |
| 882.7558          | 90.91926 | 88.00863 |
| 883.2379          | 90.70657 | 87.78829 |
| 883.72            | 90.49406 | 87.56876 |
| 884.2021          | 90.28166 | 87.34992 |
| 884.6843          | 90.06953 | 87.13184 |
| 885.1664          | 89.85791 | 86.91471 |
| 885.6485          | 89.64692 | 86.69866 |
| 886.1306          | 89.43713 | 86.48401 |
| 886.6127          | 89.22898 | 86.2711  |
| 887.0948          | 89.023   | 86.06018 |
| 887.577           | 88.81998 | 85.85158 |
| 888.0591          | 88.61971 | 85.64548 |
| 888.5412          | 88.42214 | 85.44208 |
| 889.0233          | 88.22753 | 85.24169 |
| 889.5054          | 88.03602 | 85.04464 |
| 889.9875          | 87.84776 | 84.85099 |
| 890.4697          | 87.66298 | 84.66094 |
| 890.9518          | 87.48161 | 84.47443 |
| 891.4339          | 87.3034  | 84.29114 |
| 891.916           | 87.12917 | 84.11203 |
| 892.3981          | 86.9596  | 83.93789 |
| 892.8802          | 86.79493 | 83.76893 |
| 893.3624          | 86.63536 | 83.60531 |
| 893.8445          | 86.48167 | 83.44807 |
| 894.3266          | 86.33431 | 83.29779 |
| 894.8087          | 86.19444 | 83.15606 |
| 895.2908          | 86.06388 | 83.02544 |
| 895.7729          | 85.94112 | 82.90354 |
| 896.2551          | 85.82523 | 82.78895 |
| 896.7372          | 85.71617 | 82.68136 |
| 897.2193          | 85.61362 | 82.58006 |
| 897.7014          | 85.51733 | 82.48483 |
| 898.1835          | 85.42728 | 82.39555 |
| 898.6656          | 85.34261 | 82.31117 |
| 899.1478          | 85.26192 | 82.23013 |
| 899.6299          | 85.18687 | 82.15397 |
| 900.112           | 85.11865 | 82.08369 |
| 900.5941          | 85.05731 | 82.01927 |
| 901.0762          | 85.00279 | 81.96065 |
| 901.5583          | 84.95655 | 81.90887 |
| 902.0405          | 84.91917 | 81.86432 |
| 902.5226          | 84.89314 | 81.82893 |
| 903.0047          | 84.88268 | 81.80615 |
| 903.4868          | 84.88309 | 81.79195 |
| 903.9689          | 84.89143 | 81.78387 |
| 904.451           | 84.90653 | 81.78075 |



| Wavenumber (cm-1) | After    | Before   |
|-------------------|----------|----------|
| 904.9332          | 84.92621 | 81.78068 |
| 905.4153          | 84.95044 | 81.78362 |
| 905.8974          | 84.97881 | 81.78918 |
| 906.3795          | 85.01027 | 81.79654 |
| 906.8616          | 85.0438  | 81.80504 |
| 907.3438          | 85.07887 | 81.81381 |
| 907.8259          | 85.11474 | 81.82184 |
| 908.308           | 85.15104 | 81.82877 |
| 908.7901          | 85.18775 | 81.83453 |
| 909.2722          | 85.22302 | 81.83705 |
| 909.7543          | 85.25575 | 81.83518 |
| 910.2365          | 85.28357 | 81.82616 |
| 910.7186          | 85.30269 | 81.80554 |
| 911.2007          | 85.31628 | 81.77725 |
| 911.6829          | 85.32617 | 81.74352 |
| 912.1649          | 85.3327  | 81.70492 |
| 912.6471          | 85.33688 | 81.66276 |
| 913.1292          | 85.33852 | 81.61691 |
| 913.6113          | 85.33757 | 81.56733 |
| 914.0934          | 85.33479 | 81.515   |
| 914.5756          | 85.33129 | 81.46126 |
| 915.0576          | 85.32594 | 81.40496 |
| 915.5398          | 85.31802 | 81.34548 |
| 916.0219          | 85.30736 | 81.28272 |
| 916.504           | 85.29366 | 81.21639 |
| 916.9861          | 85.27666 | 81.14642 |
| 917.4683          | 85.25621 | 81.0728  |
| 917.9503          | 85.23161 | 80.99512 |
| 918.4325          | 85.20178 | 80.91267 |
| 918.9146          | 85.16778 | 80.82626 |
| 919.3967          | 85.13023 | 80.73633 |
| 919.8788          | 85.08929 | 80.64311 |
| 920.361           | 85.04537 | 80.54694 |
| 920.843           | 84.99847 | 80.44784 |
| 921.3252          | 84.94865 | 80.34588 |
| 921.8073          | 84.89621 | 80.24123 |
| 922.2894          | 84.84159 | 80.13409 |
| 922.7715          | 84.7845  | 80.02451 |
| 923.2537          | 84.72478 | 79.91263 |
| 923.7357          | 84.66246 | 79.79851 |
| 924.2179          | 84.59753 | 79.68215 |
| 924.7             | 84.52995 | 79.56388 |
| 925.1821          | 84.45976 | 79.44386 |
| 925.6642          | 84.38681 | 79.32248 |
| 926.1464          | 84.31079 | 79.20035 |
| 926.6284          | 84.23215 | 79.07694 |
| 927.1106          | 84.15115 | 78.95201 |
| 927.5927          | 84.06796 | 78.82548 |
| 928.0748          | 83.98282 | 78.69717 |
| 928.5569          | 83.89574 | 78.56716 |
| 929.0391          | 83.80681 | 78.43549 |
| 929.5211          | 83.71613 | 78.30211 |
| 930.0033          | 83.62374 | 78.16694 |
| 930.4854          | 83.52985 | 78.03002 |
| 930.9675          | 83.43462 | 77.89137 |

| Wavenumber (cm-1) | After    | Before   |
|-------------------|----------|----------|
| 931.4496          | 83.33813 | 77.75104 |
| 931.9318          | 83.24042 | 77.60908 |
| 932.4138          | 83.1418  | 77.46539 |
| 932.896           | 83.04245 | 77.31991 |
| 933.3781          | 82.9428  | 77.17246 |
| 933.8602          | 82.84351 | 77.02275 |
| 934.3423          | 82.74401 | 76.87116 |
| 934.8245          | 82.64398 | 76.71795 |
| 935.3065          | 82.54341 | 76.56327 |
| 935.7887          | 82.44215 | 76.40738 |
| 936.2708          | 82.34013 | 76.25021 |
| 936.7529          | 82.23737 | 76.09176 |
| 937.235           | 82.1336  | 75.932   |
| 937.7172          | 82.02836 | 75.77074 |
| 938.1992          | 81.92217 | 75.60841 |
| 938.6814          | 81.81541 | 75.4454  |
| 939.1635          | 81.70808 | 75.28173 |
| 939.6456          | 81.6002  | 75.11738 |
| 940.1277          | 81.49216 | 74.95295 |
| 940.6099          | 81.38416 | 74.78874 |
| 941.0919          | 81.2769  | 74.62568 |
| 941.5741          | 81.17163 | 74.46536 |
| 942.0562          | 81.06699 | 74.30614 |
| 942.5383          | 80.9621  | 74.14698 |
| 943.0204          | 80.85667 | 73.98753 |
| 943.5026          | 80.75005 | 73.82701 |
| 943.9846          | 80.64224 | 73.66551 |
| 944.4668          | 80.53311 | 73.50292 |
| 944.9489          | 80.42235 | 73.33892 |
| 945.431           | 80.30964 | 73.17326 |
| 945.9131          | 80.19487 | 73.00573 |
| 946.3953          | 80.07785 | 72.83607 |
| 946.8773          | 79.95848 | 72.66419 |
| 947.3595          | 79.83675 | 72.49017 |
| 947.8416          | 79.71217 | 72.31327 |
| 948.3237          | 79.58442 | 72.13315 |
| 948.8058          | 79.45291 | 71.94888 |
| 949.288           | 79.31665 | 71.75893 |
| 949.77            | 79.17641 | 71.56474 |
| 950.2522          | 79.03268 | 71.36714 |
| 950.7343          | 78.88553 | 71.16639 |
| 951.2164          | 78.73524 | 70.96304 |
| 951.6985          | 78.5817  | 70.75703 |
| 952.1807          | 78.42484 | 70.5484  |
| 952.6627          | 78.26475 | 70.33746 |
| 953.1449          | 78.10151 | 70.12463 |
| 953.627           | 77.93505 | 69.90972 |
| 954.1091          | 77.76537 | 69.69264 |
| 954.5912          | 77.59239 | 69.47341 |
| 955.0734          | 77.41602 | 69.25194 |
| 955.5554          | 77.2364  | 69.02843 |
| 956.0376          | 77.05363 | 68.80299 |
| 956.5197          | 76.86799 | 68.57581 |
| 957.0018          | 76.67999 | 68.34719 |
| 957.4839          | 76.48899 | 68.11688 |

| Wavenumber (cm-1) | After    | Before   |
|-------------------|----------|----------|
| 957.9661          | 76.29454 | 67.88475 |
| 958.4481          | 76.09644 | 67.6508  |
| 958.9303          | 75.89429 | 67.41492 |
| 959.4124          | 75.68815 | 67.17717 |
| 959.8945          | 75.4779  | 66.93757 |
| 960.3766          | 75.26344 | 66.69611 |
| 960.8588          | 75.0447  | 66.4528  |
| 961.3408          | 74.82143 | 66.20761 |
| 961.823           | 74.59336 | 65.96055 |
| 962.3051          | 74.3604  | 65.71163 |
| 962.7872          | 74.12254 | 65.4609  |
| 963.2693          | 73.87929 | 65.20828 |
| 963.7515          | 73.63039 | 64.95372 |
| 964.2335          | 73.37518 | 64.69711 |
| 964.7157          | 73.11257 | 64.43818 |
| 965.1978          | 72.84355 | 64.17724 |
| 965.6799          | 72.56873 | 63.91449 |
| 966.162           | 72.28821 | 63.65004 |
| 966.6442          | 72.00227 | 63.38407 |
| 967.1262          | 71.71103 | 63.11654 |
| 967.6084          | 71.41452 | 62.84749 |
| 968.0905          | 71.11317 | 62.57694 |
| 968.5726          | 70.80766 | 62.30486 |
| 969.0547          | 70.49733 | 62.03142 |
| 969.5369          | 70.18171 | 61.75683 |
| 970.0189          | 69.86083 | 61.48111 |
| 970.5011          | 69.5347  | 61.20425 |
| 970.9832          | 69.20283 | 60.92656 |
| 971.4653          | 68.86507 | 60.64821 |
| 971.9474          | 68.52056 | 60.36964 |
| 972.4296          | 68.16779 | 60.09162 |
| 972.9116          | 67.80849 | 59.81337 |
| 973.3938          | 67.44378 | 59.53448 |
| 973.8759          | 67.07407 | 59.25475 |
| 974.358           | 66.70004 | 58.97374 |
| 974.8401          | 66.32198 | 58.69167 |
| 975.3223          | 65.94009 | 58.40853 |
| 975.8043          | 65.55512 | 58.12444 |
| 976.2865          | 65.16804 | 57.83968 |
| 976.7686          | 64.77831 | 57.55366 |
| 977.2507          | 64.38572 | 57.26589 |
| 977.7328          | 63.99044 | 56.97636 |
| 978.215           | 63.59263 | 56.6852  |
| 978.697           | 63.19215 | 56.3915  |
| 979.1792          | 62.7891  | 56.09486 |
| 979.6613          | 62.38295 | 55.79385 |
| 980.1434          | 61.97268 | 55.48607 |
| 980.6255          | 61.55992 | 55.17415 |
| 981.1077          | 61.14577 | 54.85974 |
| 981.5897          | 60.73087 | 54.54347 |
| 982.0719          | 60.31614 | 54.22651 |
| 982.554           | 59.90173 | 53.90891 |
| 983.0361          | 59.48795 | 53.59092 |
| 983.5182          | 59.07522 | 53.2732  |
| 984.0004          | 58.66379 | 52.95651 |

| Wavenumber (cm-1) | After    | Before   |
|-------------------|----------|----------|
| 984.4824          | 58.25441 | 52.64086 |
| 984.9646          | 57.84781 | 52.32647 |
| 985.4467          | 57.44434 | 52.01355 |
| 985.9288          | 57.04415 | 51.7021  |
| 986.4109          | 56.64848 | 51.39288 |
| 986.8931          | 56.25806 | 51.08637 |
| 987.3751          | 55.87453 | 50.78342 |
| 987.8573          | 55.50046 | 50.4853  |
| 988.3394          | 55.13377 | 50.19115 |
| 988.8215          | 54.77325 | 49.90046 |
| 989.3036          | 54.41882 | 49.61334 |
| 989.7858          | 54.07004 | 49.32979 |
| 990.2678          | 53.72672 | 49.04963 |
| 990.75            | 53.38884 | 48.77289 |
| 991.2321          | 53.0554  | 48.49894 |
| 991.7142          | 52.7247  | 48.22657 |
| 992.1963          | 52.3988  | 47.95747 |
| 992.6785          | 52.07921 | 47.69291 |
| 993.1605          | 51.76602 | 47.433   |
| 993.6427          | 51.45927 | 47.17775 |
| 994.1248          | 51.16068 | 46.9288  |
| 994.6069          | 50.87098 | 46.68688 |
| 995.089           | 50.59313 | 46.45467 |
| 995.5712          | 50.33215 | 46.23673 |
| 996.0532          | 50.08255 | 46.02818 |
| 996.5354          | 49.84096 | 45.82607 |
| 997.0175          | 49.60606 | 45.62924 |
| 997.4996          | 49.37548 | 45.43554 |
| 997.9817          | 49.14908 | 45.24498 |
| 998.4639          | 48.92638 | 45.05722 |
| 998.9459          | 48.70597 | 44.87117 |
| 999.4281          | 48.4863  | 44.68571 |
| 999.9102          | 48.26733 | 44.50057 |
| 1000.392          | 48.04868 | 44.31522 |
| 1000.874          | 47.8299  | 44.12931 |
| 1001.357          | 47.61097 | 43.94291 |
| 1001.839          | 47.39037 | 43.75436 |
| 1002.321          | 47.16711 | 43.56269 |
| 1002.803          | 46.9395  | 43.36585 |
| 1003.285          | 46.70493 | 43.16051 |
| 1003.767          | 46.46517 | 42.94947 |
| 1004.249          | 46.2212  | 42.73435 |
| 1004.731          | 45.97275 | 42.51531 |
| 1005.214          | 45.71973 | 42.29294 |
| 1005.696          | 45.46262 | 42.0676  |
| 1006.178          | 45.2014  | 41.83933 |
| 1006.66           | 44.93755 | 41.60955 |
| 1007.142          | 44.67386 | 41.38059 |
| 1007.624          | 44.4064  | 41.1497  |
| 1008.106          | 44.13226 | 40.91499 |
| 1008.588          | 43.85118 | 40.67635 |
| 1009.07           | 43.56325 | 40.4338  |
| 1009.552          | 43.26458 | 40.1851  |
| 1010.035          | 42.95345 | 39.9293  |
| 1010.517          | 42.6235  | 39.66249 |

| Wavenumber (cm-1) | After    | Before   |
|-------------------|----------|----------|
| 1010.999          | 42.26391 | 39.37795 |
| 1011.481          | 41.88632 | 39.08315 |
| 1011.963          | 41.49785 | 38.78265 |
| 1012.445          | 41.10132 | 38.47838 |
| 1012.927          | 40.70198 | 38.17383 |
| 1013.409          | 40.29969 | 37.86889 |
| 1013.892          | 39.89528 | 37.56413 |
| 1014.374          | 39.49113 | 37.26097 |
| 1014.856          | 39.08953 | 36.96053 |
| 1015.338          | 38.69171 | 36.66423 |
| 1015.82           | 38.29944 | 36.37367 |
| 1016.302          | 37.91349 | 36.08943 |
| 1016.784          | 37.53369 | 35.81142 |
| 1017.266          | 37.1647  | 35.54329 |
| 1017.749          | 36.80914 | 35.28705 |
| 1018.231          | 36.47301 | 35.04755 |
| 1018.713          | 36.16611 | 34.83282 |
| 1019.195          | 35.87973 | 34.63552 |
| 1019.677          | 35.60883 | 34.45137 |
| 1020.159          | 35.35221 | 34.27922 |
| 1020.641          | 35.1069  | 34.11642 |
| 1021.123          | 34.87312 | 33.96316 |
| 1021.605          | 34.65084 | 33.81937 |
| 1022.088          | 34.43781 | 33.68328 |
| 1022.57           | 34.23089 | 33.55257 |
| 1023.052          | 34.03271 | 33.42879 |
| 1023.534          | 33.84481 | 33.31271 |
| 1024.016          | 33.66735 | 33.20437 |
| 1024.498          | 33.50091 | 33.10421 |
| 1024.98           | 33.34578 | 33.01176 |
| 1025.462          | 33.20202 | 32.92671 |
| 1025.944          | 33.07091 | 32.84901 |
| 1026.427          | 32.95461 | 32.7786  |
| 1026.909          | 32.8506  | 32.71524 |
| 1027.391          | 32.75731 | 32.65873 |
| 1027.873          | 32.67408 | 32.60892 |
| 1028.355          | 32.59977 | 32.5657  |
| 1028.837          | 32.53424 | 32.52882 |
| 1029.319          | 32.47721 | 32.4981  |
| 1029.801          | 32.42796 | 32.47323 |
| 1030.284          | 32.38575 | 32.45379 |
| 1030.766          | 32.35047 | 32.43996 |
| 1031.248          | 32.32185 | 32.43184 |
| 1031.73           | 32.29963 | 32.42926 |
| 1032.212          | 32.2837  | 32.43201 |
| 1032.694          | 32.27331 | 32.44033 |
| 1033.176          | 32.26793 | 32.45419 |
| 1033.658          | 32.26672 | 32.47404 |
| 1034.141          | 32.26841 | 32.5008  |
| 1034.623          | 32.27373 | 32.53312 |
| 1035.105          | 32.28301 | 32.57007 |
| 1035.587          | 32.29623 | 32.61123 |
| 1036.069          | 32.31357 | 32.6559  |
| 1036.551          | 32.33467 | 32.70386 |
| 1037.033          | 32.35929 | 32.75484 |

| Wavenumber (cm-1) | After    | Before   |
|-------------------|----------|----------|
| 1037.515          | 32.38727 | 32.80832 |
| 1037.997          | 32.41833 | 32.86376 |
| 1038.479          | 32.45249 | 32.92103 |
| 1038.962          | 32.48975 | 32.97992 |
| 1039.444          | 32.52988 | 33.04014 |
| 1039.926          | 32.57253 | 33.10151 |
| 1040.408          | 32.61803 | 33.16359 |
| 1040.89           | 32.66643 | 33.22601 |
| 1041.372          | 32.71832 | 33.28834 |
| 1041.854          | 32.77494 | 33.35003 |
| 1042.336          | 32.83447 | 33.41107 |
| 1042.819          | 32.89572 | 33.47139 |
| 1043.301          | 32.95798 | 33.53066 |
| 1043.783          | 33.02013 | 33.5885  |
| 1044.265          | 33.08223 | 33.64499 |
| 1044.747          | 33.14401 | 33.69995 |
| 1045.229          | 33.20538 | 33.75367 |
| 1045.711          | 33.26659 | 33.80689 |
| 1046.193          | 33.32617 | 33.85811 |
| 1046.676          | 33.38284 | 33.90613 |
| 1047.158          | 33.43628 | 33.95073 |
| 1047.64           | 33.48645 | 33.99183 |
| 1048.122          | 33.53123 | 34.02779 |
| 1048.604          | 33.56952 | 34.05781 |
| 1049.086          | 33.59819 | 34.07935 |
| 1049.568          | 33.61211 | 34.08823 |
| 1050.05           | 33.61626 | 34.08864 |
| 1050.532          | 33.61362 | 34.08309 |
| 1051.015          | 33.6051  | 34.07244 |
| 1051.497          | 33.59263 | 34.05837 |
| 1051.979          | 33.57618 | 34.04086 |
| 1052.461          | 33.55596 | 34.02013 |
| 1052.943          | 33.53324 | 33.99722 |
| 1053.425          | 33.50963 | 33.97334 |
| 1053.907          | 33.48433 | 33.94811 |
| 1054.389          | 33.45705 | 33.92153 |
| 1054.871          | 33.4279  | 33.89375 |
| 1055.354          | 33.39671 | 33.86465 |
| 1055.836          | 33.36404 | 33.83502 |
| 1056.318          | 33.33028 | 33.80535 |
| 1056.8            | 33.29576 | 33.77642 |
| 1057.282          | 33.26093 | 33.7494  |
| 1057.764          | 33.2258  | 33.72351 |
| 1058.246          | 33.19043 | 33.69835 |
| 1058.728          | 33.15503 | 33.67395 |
| 1059.211          | 33.1198  | 33.65019 |
| 1059.693          | 33.08487 | 33.62716 |
| 1060.175          | 33.05039 | 33.60498 |
| 1060.657          | 33.01637 | 33.58343 |
| 1061.139          | 32.98262 | 33.56211 |
| 1061.621          | 32.94983 | 33.54172 |
| 1062.103          | 32.91853 | 33.52277 |
| 1062.585          | 32.88894 | 33.50542 |
| 1063.068          | 32.86121 | 33.48982 |
| 1063.55           | 32.836   | 33.47649 |

| Wavenumber (cm-1) | After    | Before   |
|-------------------|----------|----------|
| 1064.032          | 32.81374 | 33.46568 |
| 1064.514          | 32.79539 | 33.45821 |
| 1064.996          | 32.78255 | 33.45537 |
| 1065.478          | 32.77386 | 33.456   |
| 1065.96           | 32.76859 | 33.45942 |
| 1066.442          | 32.76658 | 33.46546 |
| 1066.924          | 32.76743 | 33.4737  |
| 1067.406          | 32.77117 | 33.48419 |
| 1067.889          | 32.77783 | 33.49691 |
| 1068.371          | 32.78706 | 33.5116  |
| 1068.853          | 32.79834 | 33.52789 |
| 1069.335          | 32.81219 | 33.54606 |
| 1069.817          | 32.82897 | 33.56621 |
| 1070.299          | 32.84873 | 33.58838 |
| 1070.781          | 32.87158 | 33.61264 |
| 1071.263          | 32.8977  | 33.63893 |
| 1071.746          | 32.92718 | 33.6672  |
| 1072.228          | 32.96043 | 33.69746 |
| 1072.71           | 32.99809 | 33.72971 |
| 1073.192          | 33.03949 | 33.76392 |
| 1073.674          | 33.08421 | 33.80006 |
| 1074.156          | 33.13213 | 33.83814 |
| 1074.638          | 33.183   | 33.87822 |
| 1075.12           | 33.23674 | 33.92016 |
| 1075.603          | 33.29328 | 33.96392 |
| 1076.085          | 33.35232 | 34.00931 |
| 1076.567          | 33.41341 | 34.056   |
| 1077.049          | 33.47691 | 34.10439 |
| 1077.531          | 33.54302 | 34.15475 |
| 1078.013          | 33.61171 | 34.20706 |
| 1078.495          | 33.68293 | 34.26124 |
| 1078.977          | 33.7569  | 34.31775 |
| 1079.459          | 33.83365 | 34.37676 |
| 1079.942          | 33.91365 | 34.43902 |
| 1080.424          | 33.99769 | 34.50584 |
| 1080.906          | 34.08475 | 34.5757  |
| 1081.388          | 34.17417 | 34.64767 |
| 1081.87           | 34.26564 | 34.72129 |
| 1082.352          | 34.35863 | 34.79579 |
| 1082.834          | 34.45312 | 34.87125 |
| 1083.316          | 34.54897 | 34.94753 |
| 1083.798          | 34.64599 | 35.02444 |
| 1084.281          | 34.74403 | 35.10194 |
| 1084.763          | 34.84276 | 35.17945 |
| 1085.245          | 34.94183 | 35.25639 |
| 1085.727          | 35.04112 | 35.33263 |
| 1086.209          | 35.14059 | 35.4082  |
| 1086.691          | 35.2396  | 35.48202 |
| 1087.173          | 35.3378  | 35.55352 |
| 1087.655          | 35.43431 | 35.62115 |
| 1088.138          | 35.52776 | 35.68235 |
| 1088.62           | 35.61935 | 35.73961 |
| 1089.102          | 35.7098  | 35.79443 |
| 1089.584          | 35.79924 | 35.84727 |
| 1090.066          | 35.88803 | 35.89908 |

| Wavenumber (cm-1) | After    | Before   |
|-------------------|----------|----------|
| 1090.548          | 35.97622 | 35.94986 |
| 1091.03           | 36.06379 | 35.99971 |
| 1091.512          | 36.15115 | 36.04926 |
| 1091.995          | 36.23892 | 36.09931 |
| 1092.477          | 36.32647 | 36.14948 |
| 1092.959          | 36.41343 | 36.19964 |
| 1093.441          | 36.49976 | 36.24984 |
| 1093.923          | 36.5854  | 36.30002 |
| 1094.405          | 36.67005 | 36.35045 |
| 1094.887          | 36.75358 | 36.40137 |
| 1095.369          | 36.83537 | 36.45296 |
| 1095.851          | 36.91437 | 36.50554 |
| 1096.333          | 36.99174 | 36.55901 |
| 1096.816          | 37.06826 | 36.61339 |
| 1097.298          | 37.14419 | 36.66875 |
| 1097.78           | 37.22005 | 36.72514 |
| 1098.262          | 37.29591 | 36.78266 |
| 1098.744          | 37.37188 | 36.84139 |
| 1099.226          | 37.44831 | 36.90139 |
| 1099.708          | 37.5256  | 36.96264 |
| 1100.19           | 37.60369 | 37.02536 |
| 1100.673          | 37.68266 | 37.0897  |
| 1101.155          | 37.7626  | 37.15576 |
| 1101.637          | 37.84356 | 37.22365 |
| 1102.119          | 37.92582 | 37.29352 |
| 1102.601          | 38.00955 | 37.36551 |
| 1103.083          | 38.09503 | 37.43982 |
| 1103.565          | 38.18265 | 37.51671 |
| 1104.047          | 38.27226 | 37.5961  |
| 1104.53           | 38.36381 | 37.67795 |
| 1105.012          | 38.4574  | 37.76232 |
| 1105.494          | 38.55313 | 37.84934 |
| 1105.976          | 38.65098 | 37.93892 |
| 1106.458          | 38.75101 | 38.03112 |
| 1106.94           | 38.85308 | 38.12576 |
| 1107.422          | 38.95683 | 38.22246 |
| 1107.904          | 39.06291 | 38.32184 |
| 1108.386          | 39.1718  | 38.42439 |
| 1108.869          | 39.28361 | 38.53017 |
| 1109.351          | 39.39837 | 38.63919 |
| 1109.833          | 39.51673 | 38.75212 |
| 1110.315          | 39.63901 | 38.86926 |
| 1110.797          | 39.76624 | 38.99168 |
| 1111.279          | 39.90009 | 39.12115 |
| 1111.761          | 40.03889 | 39.25582 |
| 1112.243          | 40.18159 | 39.39456 |
| 1112.725          | 40.32786 | 39.53696 |
| 1113.208          | 40.47703 | 39.68225 |
| 1113.69           | 40.62907 | 39.8304  |
| 1114.172          | 40.7839  | 39.98129 |
| 1114.654          | 40.94106 | 40.13447 |
| 1115.136          | 41.1     | 40.28942 |
| 1115.618          | 41.26094 | 40.4462  |
| 1116.1            | 41.42393 | 40.60473 |
| 1116.582          | 41.5889  | 40.76492 |



| Wavenumber (cm-1) | After    | Before   |
|-------------------|----------|----------|
| 1117.065          | 41.75589 | 40.92677 |
| 1117.547          | 41.92465 | 41.08984 |
| 1118.029          | 42.09502 | 41.25385 |
| 1118.511          | 42.26683 | 41.41831 |
| 1118.993          | 42.43981 | 41.58246 |
| 1119.475          | 42.61402 | 41.74684 |
| 1119.957          | 42.78944 | 41.91173 |
| 1120.439          | 42.96602 | 42.07716 |
| 1120.922          | 43.14375 | 42.24328 |
| 1121.404          | 43.32246 | 42.40995 |
| 1121.886          | 43.50206 | 42.57711 |
| 1122.368          | 43.6824  | 42.74476 |
| 1122.85           | 43.86327 | 42.91293 |
| 1123.332          | 44.04476 | 43.08152 |
| 1123.814          | 44.2269  | 43.25048 |
| 1124.296          | 44.40959 | 43.4197  |
| 1124.778          | 44.59269 | 43.58905 |
| 1125.26           | 44.77634 | 43.75862 |
| 1125.743          | 44.96055 | 43.9284  |
| 1126.225          | 45.1456  | 44.09853 |
| 1126.707          | 45.33205 | 44.26932 |
| 1127.189          | 45.51907 | 44.44026 |
| 1127.671          | 45.70611 | 44.61103 |
| 1128.153          | 45.89289 | 44.78147 |
| 1128.635          | 46.07902 | 44.95137 |
| 1129.117          | 46.26435 | 45.12055 |
| 1129.6            | 46.44869 | 45.2889  |
| 1130.082          | 46.63173 | 45.45614 |
| 1130.564          | 46.81305 | 45.62188 |
| 1131.046          | 46.99266 | 45.78628 |
| 1131.528          | 47.17048 | 45.94941 |
| 1132.01           | 47.34635 | 46.11116 |
| 1132.492          | 47.52014 | 46.27141 |
| 1132.974          | 47.69166 | 46.43024 |
| 1133.457          | 47.86074 | 46.58762 |
| 1133.939          | 48.02725 | 46.74379 |
| 1134.421          | 48.1911  | 46.89928 |
| 1134.903          | 48.35201 | 47.05324 |
| 1135.385          | 48.50977 | 47.20513 |
| 1135.867          | 48.66409 | 47.35457 |
| 1136.349          | 48.81456 | 47.50091 |
| 1136.831          | 48.96132 | 47.64432 |
| 1137.313          | 49.10427 | 47.78469 |
| 1137.796          | 49.24369 | 47.92216 |
| 1138.278          | 49.38025 | 48.05725 |
| 1138.76           | 49.51263 | 48.18873 |
| 1139.242          | 49.6398  | 48.31559 |
| 1139.724          | 49.76159 | 48.43767 |
| 1140.206          | 49.87801 | 48.55503 |
| 1140.688          | 49.98752 | 48.66604 |
| 1141.17           | 50.0894  | 48.76994 |
| 1141.652          | 50.18123 | 48.86428 |
| 1142.135          | 50.25899 | 48.94492 |
| 1142.617          | 50.32684 | 49.01612 |
| 1143.099          | 50.38733 | 49.08043 |

| Wavenumber (cm-1) | After    | Before   |
|-------------------|----------|----------|
| 1143.581          | 50.4413  | 49.13872 |
| 1144.063          | 50.49038 | 49.19267 |
| 1144.545          | 50.53476 | 49.24241 |
| 1145.027          | 50.57477 | 49.28825 |
| 1145.509          | 50.61167 | 49.33141 |
| 1145.992          | 50.64712 | 49.37344 |
| 1146.474          | 50.68031 | 49.41368 |
| 1146.956          | 50.71094 | 49.45187 |
| 1147.438          | 50.73922 | 49.48826 |
| 1147.92           | 50.76521 | 49.52284 |
| 1148.402          | 50.78916 | 49.55603 |
| 1148.884          | 50.81138 | 49.5882  |
| 1149.366          | 50.83174 | 49.61948 |
| 1149.849          | 50.84983 | 49.64992 |
| 1150.331          | 50.86682 | 49.68014 |
| 1150.813          | 50.88351 | 49.71063 |
| 1151.295          | 50.90052 | 49.74186 |
| 1151.777          | 50.91869 | 49.77441 |
| 1152.259          | 50.93811 | 49.80837 |
| 1152.741          | 50.95913 | 49.84405 |
| 1153.223          | 50.98189 | 49.88149 |
| 1153.705          | 51.00622 | 49.92046 |
| 1154.188          | 51.03341 | 49.96211 |
| 1154.67           | 51.06458 | 50.0074  |
| 1155.152          | 51.10009 | 50.05665 |
| 1155.634          | 51.14013 | 50.11005 |
| 1156.116          | 51.18638 | 50.16895 |
| 1156.598          | 51.23976 | 50.23412 |
| 1157.08           | 51.30269 | 50.30755 |
| 1157.562          | 51.37905 | 50.39242 |
| 1158.044          | 51.46533 | 50.48587 |
| 1158.527          | 51.55948 | 50.58623 |
| 1159.009          | 51.66103 | 50.69312 |
| 1159.491          | 51.76882 | 50.8056  |
| 1159.973          | 51.88281 | 50.92365 |
| 1160.455          | 52.00293 | 51.04721 |
| 1160.937          | 52.12805 | 51.1754  |
| 1161.419          | 52.25657 | 51.30692 |
| 1161.901          | 52.38994 | 51.44294 |
| 1162.384          | 52.52908 | 51.5842  |
| 1162.866          | 52.674   | 51.73074 |
| 1163.348          | 52.82484 | 51.88267 |
| 1163.83           | 52.98219 | 52.04047 |
| 1164.312          | 53.14626 | 52.20429 |
| 1164.794          | 53.31834 | 52.37518 |
| 1165.276          | 53.50071 | 52.55492 |
| 1165.758          | 53.69071 | 52.74144 |
| 1166.24           | 53.88667 | 52.93342 |
| 1166.723          | 54.08791 | 53.13033 |
| 1167.205          | 54.29318 | 53.33125 |
| 1167.687          | 54.50238 | 53.53603 |
| 1168.169          | 54.71519 | 53.74444 |
| 1168.651          | 54.9309  | 53.95586 |
| 1169.133          | 55.14876 | 54.16959 |
| 1169.615          | 55.36858 | 54.38564 |

| Wavenumber (cm-1) | After    | Before   |
|-------------------|----------|----------|
| 1170.097          | 55.59005 | 54.60387 |
| 1170.579          | 55.81287 | 54.82405 |
| 1171.062          | 56.03695 | 55.04609 |
| 1171.544          | 56.26141 | 55.26946 |
| 1172.026          | 56.48568 | 55.49379 |
| 1172.508          | 56.70874 | 55.71853 |
| 1172.99           | 56.92904 | 55.94293 |
| 1173.472          | 57.1476  | 56.16728 |
| 1173.954          | 57.36491 | 56.39166 |
| 1174.436          | 57.58093 | 56.61593 |
| 1174.919          | 57.79586 | 56.84005 |
| 1175.401          | 58.00951 | 57.0638  |
| 1175.883          | 58.22172 | 57.287   |
| 1176.365          | 58.43265 | 57.50956 |
| 1176.847          | 58.64268 | 57.7315  |
| 1177.329          | 58.85108 | 57.95241 |
| 1177.811          | 59.05733 | 58.17201 |
| 1178.293          | 59.26122 | 58.39007 |
| 1178.776          | 59.46249 | 58.60635 |
| 1179.258          | 59.66074 | 58.82063 |
| 1179.74           | 59.85567 | 59.03265 |
| 1180.222          | 60.04662 | 59.2421  |
| 1180.704          | 60.23254 | 59.44856 |
| 1181.186          | 60.41421 | 59.65207 |
| 1181.668          | 60.59205 | 59.85261 |
| 1182.15           | 60.76604 | 60.04996 |
| 1182.632          | 60.93628 | 60.24384 |
| 1183.115          | 61.10284 | 60.43435 |
| 1183.597          | 61.2657  | 60.6214  |
| 1184.079          | 61.42524 | 60.80529 |
| 1184.561          | 61.58215 | 60.98667 |
| 1185.043          | 61.7355  | 61.16434 |
| 1185.525          | 61.8846  | 61.33733 |
| 1186.007          | 62.02937 | 61.50549 |
| 1186.489          | 62.16977 | 61.66879 |
| 1186.971          | 62.305   | 61.82592 |
| 1187.454          | 62.43468 | 61.97621 |
| 1187.936          | 62.55744 | 62.11758 |
| 1188.418          | 62.67098 | 62.2465  |
| 1188.9            | 62.77775 | 62.36659 |
| 1189.382          | 62.87924 | 62.48005 |
| 1189.864          | 62.976   | 62.58764 |
| 1190.346          | 63.06902 | 62.69083 |
| 1190.828          | 63.15842 | 62.78967 |
| 1191.311          | 63.24437 | 62.88439 |
| 1191.793          | 63.32758 | 62.97593 |
| 1192.275          | 63.40888 | 63.06537 |
| 1192.757          | 63.48804 | 63.15245 |
| 1193.239          | 63.56504 | 63.23718 |
| 1193.721          | 63.64005 | 63.31973 |
| 1194.203          | 63.71309 | 63.40007 |
| 1194.685          | 63.78455 | 63.47889 |
| 1195.167          | 63.85475 | 63.55665 |
| 1195.65           | 63.92401 | 63.63402 |
| 1196.132          | 63.99274 | 63.712   |

| Wavenumber (cm-1) | After    | Before   |
|-------------------|----------|----------|
| 1196.614          | 64.06094 | 63.79003 |
| 1197.096          | 64.12867 | 63.86786 |
| 1197.578          | 64.19614 | 63.94558 |
| 1198.06           | 64.26358 | 64.02322 |
| 1198.542          | 64.33102 | 64.10085 |
| 1199.024          | 64.39857 | 64.17859 |
| 1199.506          | 64.46609 | 64.25628 |
| 1199.989          | 64.53315 | 64.33347 |
| 1200.471          | 64.6007  | 64.411   |
| 1200.953          | 64.66951 | 64.4895  |
| 1201.435          | 64.73975 | 64.56916 |
| 1201.917          | 64.81152 | 64.65013 |
| 1202.399          | 64.88581 | 64.73312 |
| 1202.881          | 64.96318 | 64.81851 |
| 1203.363          | 65.04517 | 64.90743 |
| 1203.846          | 65.13438 | 65.00168 |
| 1204.328          | 65.2283  | 65.0996  |
| 1204.81           | 65.32542 | 65.20017 |
| 1205.292          | 65.42525 | 65.30317 |
| 1205.774          | 65.52688 | 65.40801 |
| 1206.256          | 65.63025 | 65.51467 |
| 1206.738          | 65.73526 | 65.62311 |
| 1207.22           | 65.84123 | 65.73281 |
| 1207.703          | 65.94725 | 65.8431  |
| 1208.185          | 66.05382 | 65.95451 |
| 1208.667          | 66.16116 | 66.06738 |
| 1209.149          | 66.26921 | 66.18169 |
| 1209.631          | 66.37802 | 66.29749 |
| 1210.113          | 66.48744 | 66.41493 |
| 1210.595          | 66.59731 | 66.53401 |
| 1211.077          | 66.70765 | 66.65513 |
| 1211.559          | 66.81857 | 66.77893 |
| 1212.042          | 66.92969 | 66.90457 |
| 1212.524          | 67.04072 | 67.03153 |
| 1213.006          | 67.15142 | 67.15953 |
| 1213.488          | 67.26144 | 67.28811 |
| 1213.97           | 67.37083 | 67.41728 |
| 1214.452          | 67.47946 | 67.54697 |
| 1214.934          | 67.58743 | 67.67703 |
| 1215.416          | 67.69503 | 67.80746 |
| 1215.898          | 67.80148 | 67.93785 |
| 1216.381          | 67.90614 | 68.06785 |
| 1216.863          | 68.00889 | 68.19734 |
| 1217.345          | 68.10967 | 68.3263  |
| 1217.827          | 68.20755 | 68.45409 |
| 1218.309          | 68.30203 | 68.58032 |
| 1218.791          | 68.39165 | 68.70405 |
| 1219.273          | 68.47399 | 68.82371 |
| 1219.755          | 68.55147 | 68.94077 |
| 1220.238          | 68.62552 | 69.05614 |
| 1220.72           | 68.6966  | 69.17006 |
| 1221.202          | 68.76569 | 69.28306 |
| 1221.684          | 68.83277 | 69.39513 |
| 1222.166          | 68.89799 | 69.50636 |
| 1222.648          | 68.96198 | 69.61715 |

| Wavenumber (cm-1) | After    | Before   |
|-------------------|----------|----------|
| 1223.13           | 69.02555 | 69.72807 |
| 1223.612          | 69.08833 | 69.83874 |
| 1224.094          | 69.15021 | 69.94894 |
| 1224.577          | 69.2113  | 70.05872 |
| 1225.059          | 69.27151 | 70.168   |
| 1225.541          | 69.33116 | 70.27678 |
| 1226.023          | 69.39047 | 70.3851  |
| 1226.505          | 69.44963 | 70.49281 |
| 1226.987          | 69.50888 | 70.59957 |
| 1227.469          | 69.56826 | 70.70588 |
| 1227.951          | 69.6278  | 70.81203 |
| 1228.434          | 69.68767 | 70.91819 |
| 1228.916          | 69.74798 | 71.02464 |
| 1229.398          | 69.8088  | 71.13139 |
| 1229.88           | 69.87022 | 71.23852 |
| 1230.362          | 69.93224 | 71.34612 |
| 1230.844          | 69.99467 | 71.45422 |
| 1231.326          | 70.05804 | 71.56308 |
| 1231.808          | 70.12267 | 71.67292 |
| 1232.291          | 70.18869 | 71.78383 |
| 1232.773          | 70.25622 | 71.89584 |
| 1233.255          | 70.32571 | 72.00936 |
| 1233.737          | 70.39745 | 72.12462 |
| 1234.219          | 70.47213 | 72.24217 |
| 1234.701          | 70.55093 | 72.36289 |
| 1235.183          | 70.63283 | 72.486   |
| 1235.665          | 70.7172  | 72.61105 |
| 1236.147          | 70.80392 | 72.73789 |
| 1236.63           | 70.89259 | 72.86625 |
| 1237.112          | 70.98327 | 72.99619 |
| 1237.594          | 71.07596 | 73.12769 |
| 1238.076          | 71.17046 | 73.26061 |
| 1238.558          | 71.26643 | 73.39472 |
| 1239.04           | 71.36412 | 73.53016 |
| 1239.522          | 71.46359 | 73.66701 |
| 1240.004          | 71.5649  | 73.80529 |
| 1240.486          | 71.66811 | 73.94508 |
| 1240.969          | 71.77311 | 74.08626 |
| 1241.451          | 71.87987 | 74.22881 |
| 1241.933          | 71.98834 | 74.3727  |
| 1242.415          | 72.09841 | 74.51779 |
| 1242.897          | 72.21019 | 74.6642  |
| 1243.379          | 72.32374 | 74.81201 |
| 1243.861          | 72.43906 | 74.96126 |
| 1244.343          | 72.55624 | 75.11199 |
| 1244.826          | 72.67522 | 75.26419 |
| 1245.308          | 72.79604 | 75.41789 |
| 1245.79           | 72.91864 | 75.57307 |
| 1246.272          | 73.04301 | 75.72971 |
| 1246.754          | 73.16921 | 75.88789 |
| 1247.236          | 73.29732 | 76.04766 |
| 1247.718          | 73.42733 | 76.20901 |
| 1248.2            | 73.55923 | 76.37193 |
| 1248.682          | 73.69315 | 76.53654 |
| 1249.165          | 73.82912 | 76.70287 |

| Wavenumber (cm-1) | After    | Before   |
|-------------------|----------|----------|
| 1249.647          | 73.96735 | 76.87107 |
| 1250.129          | 74.10816 | 77.04141 |
| 1250.611          | 74.25121 | 77.21359 |
| 1251.093          | 74.39624 | 77.38748 |
| 1251.575          | 74.5432  | 77.56303 |
| 1252.057          | 74.69194 | 77.7402  |
| 1252.539          | 74.84242 | 77.91889 |
| 1253.021          | 74.99459 | 78.09906 |
| 1253.504          | 75.14828 | 78.2805  |
| 1253.986          | 75.30328 | 78.46288 |
| 1254.468          | 75.45973 | 78.64655 |
| 1254.95           | 75.61773 | 78.83175 |
| 1255.432          | 75.77725 | 79.01845 |
| 1255.914          | 75.93826 | 79.20659 |
| 1256.396          | 76.10082 | 79.3965  |
| 1256.878          | 76.26497 | 79.5883  |
| 1257.361          | 76.43088 | 79.78257 |
| 1257.843          | 76.59891 | 79.98029 |
| 1258.325          | 76.76859 | 80.18027 |
| 1258.807          | 76.93959 | 80.38178 |
| 1259.289          | 77.11177 | 80.58453 |
| 1259.771          | 77.28497 | 80.78806 |
| 1260.253          | 77.45901 | 80.99219 |
| 1260.735          | 77.63382 | 81.19677 |
| 1261.218          | 77.80907 | 81.40135 |
| 1261.7            | 77.98436 | 81.60536 |
| 1262.182          | 78.15995 | 81.80901 |
| 1262.664          | 78.33601 | 82.01241 |
| 1263.146          | 78.51248 | 82.21542 |
| 1263.628          | 78.68922 | 82.41792 |
| 1264.11           | 78.86647 | 82.61993 |
| 1264.592          | 79.04426 | 82.82131 |
| 1265.074          | 79.22303 | 83.0222  |
| 1265.557          | 79.40364 | 83.22299 |
| 1266.039          | 79.58492 | 83.4229  |
| 1266.521          | 79.76613 | 83.62144 |
| 1267.003          | 79.94692 | 83.81831 |
| 1267.485          | 80.12676 | 84.01309 |
| 1267.967          | 80.30546 | 84.20559 |
| 1268.449          | 80.4828  | 84.39559 |
| 1268.931          | 80.65836 | 84.58274 |
| 1269.413          | 80.83157 | 84.76667 |
| 1269.896          | 81.00249 | 84.94727 |
| 1270.378          | 81.17107 | 85.12438 |
| 1270.86           | 81.33711 | 85.29781 |
| 1271.342          | 81.50047 | 85.46733 |
| 1271.824          | 81.66097 | 85.63273 |
| 1272.306          | 81.81837 | 85.79375 |
| 1272.788          | 81.97256 | 85.95017 |
| 1273.27           | 82.12353 | 86.10176 |
| 1273.753          | 82.27085 | 86.2483  |
| 1274.235          | 82.4142  | 86.3896  |
| 1274.717          | 82.55324 | 86.52535 |
| 1275.199          | 82.68753 | 86.65518 |
| 1275.681          | 82.81705 | 86.77912 |

| Wavenumber (cm-1) | After    | Before   |
|-------------------|----------|----------|
| 1276.163          | 82.94167 | 86.89703 |
| 1276.645          | 83.06143 | 87.00909 |
| 1277.127          | 83.1767  | 87.11583 |
| 1277.609          | 83.28643 | 87.21605 |
| 1278.092          | 83.38979 | 87.30882 |
| 1278.574          | 83.48656 | 87.39391 |
| 1279.056          | 83.57664 | 87.4713  |
| 1279.538          | 83.65883 | 87.5396  |
| 1280.02           | 83.73248 | 87.59814 |
| 1280.502          | 83.79573 | 87.64488 |
| 1280.984          | 83.84557 | 87.67635 |
| 1281.466          | 83.8849  | 87.69596 |
| 1281.948          | 83.91548 | 87.7058  |
| 1282.431          | 83.93781 | 87.70649 |
| 1282.913          | 83.95296 | 87.69933 |
| 1283.395          | 83.96101 | 87.68441 |
| 1283.877          | 83.96207 | 87.66196 |
| 1284.359          | 83.95706 | 87.63299 |
| 1284.841          | 83.94717 | 87.59888 |
| 1285.323          | 83.93158 | 87.55882 |
| 1285.805          | 83.90984 | 87.51243 |
| 1286.288          | 83.88201 | 87.45984 |
| 1286.77           | 83.84806 | 87.40102 |
| 1287.252          | 83.80791 | 87.33606 |
| 1287.734          | 83.7616  | 87.2651  |
| 1288.216          | 83.70867 | 87.18784 |
| 1288.698          | 83.64824 | 87.10365 |
| 1289.18           | 83.58158 | 87.0137  |
| 1289.662          | 83.50954 | 86.91875 |
| 1290.145          | 83.43256 | 86.81928 |
| 1290.627          | 83.35124 | 86.71595 |
| 1291.109          | 83.26582 | 86.60896 |
| 1291.591          | 83.1765  | 86.4986  |
| 1292.073          | 83.08376 | 86.38528 |
| 1292.555          | 82.98811 | 86.26939 |
| 1293.037          | 82.88965 | 86.15126 |
| 1293.519          | 82.7886  | 86.03131 |
| 1294.001          | 82.68521 | 85.90983 |
| 1294.484          | 82.57965 | 85.78701 |
| 1294.966          | 82.47235 | 85.66351 |
| 1295.448          | 82.36365 | 85.53976 |
| 1295.93           | 82.25399 | 85.41654 |
| 1296.412          | 82.144   | 85.29497 |
| 1296.894          | 82.03355 | 85.17444 |
| 1297.376          | 81.92265 | 85.0547  |
| 1297.858          | 81.81152 | 84.93591 |
| 1298.34           | 81.70036 | 84.81806 |
| 1298.823          | 81.58927 | 84.70128 |
| 1299.305          | 81.47842 | 84.58572 |
| 1299.787          | 81.36779 | 84.47123 |
| 1300.269          | 81.25712 | 84.35735 |
| 1300.751          | 81.14718 | 84.24501 |
| 1301.233          | 81.03859 | 84.1349  |
| 1301.715          | 80.93159 | 84.02723 |
| 1302.197          | 80.82633 | 83.9222  |

| Wavenumber (cm-1) | After    | Before   |
|-------------------|----------|----------|
| 1302.68           | 80.72357 | 83.82059 |
| 1303.162          | 80.62374 | 83.72283 |
| 1303.644          | 80.52797 | 83.63012 |
| 1304.126          | 80.43805 | 83.54441 |
| 1304.608          | 80.35243 | 83.46395 |
| 1305.09           | 80.27022 | 83.38773 |
| 1305.572          | 80.19121 | 83.31548 |
| 1306.054          | 80.11489 | 83.24659 |
| 1306.536          | 80.04133 | 83.18112 |
| 1307.019          | 79.97054 | 83.11907 |
| 1307.501          | 79.90219 | 83.06004 |
| 1307.983          | 79.83574 | 83.0035  |
| 1308.465          | 79.77164 | 82.94983 |
| 1308.947          | 79.71015 | 82.89921 |
| 1309.429          | 79.65134 | 82.85167 |
| 1309.911          | 79.59532 | 82.80734 |
| 1310.393          | 79.54211 | 82.76608 |
| 1310.875          | 79.49171 | 82.72781 |
| 1311.358          | 79.44429 | 82.69253 |
| 1311.84           | 79.40007 | 82.66015 |
| 1312.322          | 79.3588  | 82.63072 |
| 1312.804          | 79.32037 | 82.60423 |
| 1313.286          | 79.28473 | 82.58073 |
| 1313.768          | 79.25184 | 82.56027 |
| 1314.25           | 79.22161 | 82.54273 |
| 1314.732          | 79.19405 | 82.52809 |
| 1315.215          | 79.16895 | 82.51618 |
| 1315.697          | 79.14607 | 82.50671 |
| 1316.179          | 79.12566 | 82.50005 |
| 1316.661          | 79.10795 | 82.49643 |
| 1317.143          | 79.0929  | 82.49584 |
| 1317.625          | 79.08047 | 82.49821 |
| 1318.107          | 79.07094 | 82.50393 |
| 1318.589          | 79.06438 | 82.5132  |
| 1319.072          | 79.06125 | 82.52669 |
| 1319.554          | 79.06234 | 82.54562 |
| 1320.036          | 79.06673 | 82.5686  |
| 1320.518          | 79.07381 | 82.59473 |
| 1321              | 79.08337 | 82.62368 |
| 1321.482          | 79.09506 | 82.65483 |
| 1321.964          | 79.10872 | 82.68807 |
| 1322.446          | 79.12422 | 82.72324 |
| 1322.928          | 79.14116 | 82.75987 |
| 1323.411          | 79.159   | 82.79739 |
| 1323.893          | 79.17803 | 82.83595 |
| 1324.375          | 79.19841 | 82.87553 |
| 1324.857          | 79.22002 | 82.91599 |
| 1325.339          | 79.24278 | 82.95726 |
| 1325.821          | 79.26678 | 82.99913 |
| 1326.303          | 79.29198 | 83.04139 |
| 1326.785          | 79.31874 | 83.08392 |
| 1327.267          | 79.34767 | 83.12664 |
| 1327.75           | 79.37779 | 83.16927 |
| 1328.232          | 79.40845 | 83.2116  |
| 1328.714          | 79.43929 | 83.25341 |



| Wavenumber (cm-1) | After    | Before   |
|-------------------|----------|----------|
| 1329.196          | 79.46976 | 83.29444 |
| 1329.678          | 79.49977 | 83.33459 |
| 1330.16           | 79.52913 | 83.37367 |
| 1330.642          | 79.55756 | 83.41159 |
| 1331.124          | 79.58482 | 83.44828 |
| 1331.607          | 79.6106  | 83.48339 |
| 1332.089          | 79.63454 | 83.51657 |
| 1332.571          | 79.65643 | 83.54763 |
| 1333.053          | 79.67617 | 83.57644 |
| 1333.535          | 79.69317 | 83.60255 |
| 1334.017          | 79.70705 | 83.62566 |
| 1334.499          | 79.71703 | 83.64519 |
| 1334.981          | 79.72194 | 83.6602  |
| 1335.464          | 79.72264 | 83.67136 |
| 1335.946          | 79.7196  | 83.67899 |
| 1336.428          | 79.71281 | 83.68308 |
| 1336.91           | 79.70243 | 83.68373 |
| 1337.392          | 79.68848 | 83.68092 |
| 1337.874          | 79.67086 | 83.67457 |
| 1338.356          | 79.64987 | 83.66489 |
| 1338.838          | 79.62605 | 83.65225 |
| 1339.32           | 79.59863 | 83.63609 |
| 1339.802          | 79.5671  | 83.61598 |
| 1340.285          | 79.53133 | 83.59183 |
| 1340.767          | 79.49121 | 83.56353 |
| 1341.249          | 79.44621 | 83.53065 |
| 1341.731          | 79.39605 | 83.49297 |
| 1342.213          | 79.33981 | 83.44979 |
| 1342.695          | 79.27595 | 83.39993 |
| 1343.177          | 79.206   | 83.34452 |
| 1343.659          | 79.13089 | 83.28425 |
| 1344.142          | 79.0509  | 83.21929 |
| 1344.624          | 78.96657 | 83.14999 |
| 1345.106          | 78.87799 | 83.07649 |
| 1345.588          | 78.78529 | 82.99885 |
| 1346.07           | 78.68899 | 82.91759 |
| 1346.552          | 78.58984 | 82.83347 |
| 1347.034          | 78.4873  | 82.7458  |
| 1347.516          | 78.3811  | 82.65413 |
| 1347.999          | 78.2713  | 82.5585  |
| 1348.481          | 78.15794 | 82.45899 |
| 1348.963          | 78.04082 | 82.35508 |
| 1349.445          | 77.91998 | 82.24666 |
| 1349.927          | 77.79494 | 82.13286 |
| 1350.409          | 77.6649  | 82.0121  |
| 1350.891          | 77.53099 | 81.88625 |
| 1351.373          | 77.39395 | 81.75652 |
| 1351.855          | 77.25415 | 81.62344 |
| 1352.338          | 77.11214 | 81.48791 |
| 1352.82           | 76.96809 | 81.34999 |
| 1353.302          | 76.82216 | 81.20993 |
| 1353.784          | 76.67475 | 81.06822 |
| 1354.266          | 76.52625 | 80.92535 |
| 1354.748          | 76.3768  | 80.78155 |
| 1355.23           | 76.22659 | 80.63716 |

| Wavenumber (cm-1) | After    | Before   |
|-------------------|----------|----------|
| 1355.712          | 76.07581 | 80.49239 |
| 1356.194          | 75.92457 | 80.34732 |
| 1356.677          | 75.77328 | 80.20271 |
| 1357.159          | 75.62226 | 80.05904 |
| 1357.641          | 75.47194 | 79.91723 |
| 1358.123          | 75.32295 | 79.77873 |
| 1358.605          | 75.17506 | 79.64248 |
| 1359.087          | 75.02818 | 79.50793 |
| 1359.569          | 74.88243 | 79.37501 |
| 1360.051          | 74.73787 | 79.2434  |
| 1360.534          | 74.59461 | 79.11332 |
| 1361.016          | 74.45283 | 78.9849  |
| 1361.498          | 74.31245 | 78.85809 |
| 1361.98           | 74.17336 | 78.73276 |
| 1362.462          | 74.03606 | 78.60914 |
| 1362.944          | 73.90092 | 78.48735 |
| 1363.426          | 73.76814 | 78.36756 |
| 1363.908          | 73.63785 | 78.24999 |
| 1364.391          | 73.5105  | 78.13451 |
| 1364.873          | 73.38634 | 78.0211  |
| 1365.355          | 73.26598 | 77.90958 |
| 1365.837          | 73.15043 | 77.79946 |
| 1366.319          | 73.03892 | 77.69153 |
| 1366.801          | 72.93105 | 77.58628 |
| 1367.283          | 72.82674 | 77.48406 |
| 1367.765          | 72.72578 | 77.38536 |
| 1368.247          | 72.62828 | 77.29016 |
| 1368.729          | 72.53429 | 77.19858 |
| 1369.212          | 72.4437  | 77.11065 |
| 1369.694          | 72.35629 | 77.02617 |
| 1370.176          | 72.27235 | 76.94592 |
| 1370.658          | 72.19199 | 76.87055 |
| 1371.14           | 72.11532 | 76.80021 |
| 1371.622          | 72.04245 | 76.73493 |
| 1372.104          | 71.97341 | 76.67576 |
| 1372.586          | 71.90823 | 76.62324 |
| 1373.069          | 71.847   | 76.57893 |
| 1373.551          | 71.78976 | 76.54539 |
| 1374.033          | 71.73655 | 76.52012 |
| 1374.515          | 71.68742 | 76.50161 |
| 1374.997          | 71.64246 | 76.48946 |
| 1375.479          | 71.60188 | 76.48279 |
| 1375.961          | 71.56552 | 76.48145 |
| 1376.443          | 71.53336 | 76.48528 |
| 1376.926          | 71.50512 | 76.49339 |
| 1377.408          | 71.48027 | 76.50446 |
| 1377.89           | 71.45965 | 76.51954 |
| 1378.372          | 71.44386 | 76.53921 |
| 1378.854          | 71.43295 | 76.56339 |
| 1379.336          | 71.42683 | 76.59206 |
| 1379.818          | 71.4265  | 76.62565 |
| 1380.3            | 71.43231 | 76.66426 |
| 1380.782          | 71.44583 | 76.70889 |
| 1381.265          | 71.46966 | 76.76134 |
| 1381.747          | 71.50095 | 76.8193  |

| Wavenumber (cm-1) | After    | Before   |
|-------------------|----------|----------|
| 1382.229          | 71.53795 | 76.8813  |
| 1382.711          | 71.58    | 76.94661 |
| 1383.193          | 71.62592 | 77.01405 |
| 1383.675          | 71.67555 | 77.08354 |
| 1384.157          | 71.72867 | 77.1548  |
| 1384.639          | 71.78447 | 77.22733 |
| 1385.121          | 71.842   | 77.30077 |
| 1385.604          | 71.90142 | 77.37442 |
| 1386.086          | 71.96268 | 77.44753 |
| 1386.568          | 72.02555 | 77.51979 |
| 1387.05           | 72.09    | 77.59112 |
| 1387.532          | 72.15544 | 77.66009 |
| 1388.014          | 72.22148 | 77.72591 |
| 1388.496          | 72.2876  | 77.78671 |
| 1388.978          | 72.35305 | 77.83944 |
| 1389.461          | 72.41807 | 77.88672 |
| 1389.943          | 72.48269 | 77.93005 |
| 1390.425          | 72.54668 | 77.96974 |
| 1390.907          | 72.60982 | 78.00664 |
| 1391.389          | 72.67211 | 78.04067 |
| 1391.871          | 72.7334  | 78.07182 |
| 1392.353          | 72.79391 | 78.10076 |
| 1392.835          | 72.85428 | 78.12851 |
| 1393.318          | 72.91328 | 78.15411 |
| 1393.8            | 72.96992 | 78.17695 |
| 1394.282          | 73.02402 | 78.19697 |
| 1394.764          | 73.07544 | 78.21395 |
| 1395.246          | 73.12294 | 78.22764 |
| 1395.728          | 73.16586 | 78.23792 |
| 1396.21           | 73.20226 | 78.24415 |
| 1396.692          | 73.2289  | 78.24526 |
| 1397.174          | 73.24895 | 78.24239 |
| 1397.656          | 73.26433 | 78.23625 |
| 1398.139          | 73.27563 | 78.22707 |
| 1398.621          | 73.2841  | 78.21532 |
| 1399.103          | 73.28973 | 78.20107 |
| 1399.585          | 73.29269 | 78.18446 |
| 1400.067          | 73.29378 | 78.16593 |
| 1400.549          | 73.29401 | 78.14609 |
| 1401.031          | 73.29295 | 78.12454 |
| 1401.513          | 73.29044 | 78.10113 |
| 1401.996          | 73.28658 | 78.07591 |
| 1402.478          | 73.28128 | 78.04896 |
| 1402.96           | 73.27496 | 78.02017 |
| 1403.442          | 73.26791 | 77.98955 |
| 1403.924          | 73.26041 | 77.95677 |
| 1404.406          | 73.2529  | 77.92114 |
| 1404.888          | 73.24528 | 77.88368 |
| 1405.37           | 73.23751 | 77.84502 |
| 1405.853          | 73.22973 | 77.8055  |
| 1406.335          | 73.22198 | 77.76568 |
| 1406.817          | 73.21443 | 77.72561 |
| 1407.299          | 73.20717 | 77.68548 |
| 1407.781          | 73.20021 | 77.64551 |
| 1408.263          | 73.19352 | 77.60583 |

| Wavenumber (cm-1) | After    | Before   |
|-------------------|----------|----------|
| 1408.745          | 73.18742 | 77.56686 |
| 1409.227          | 73.18222 | 77.52902 |
| 1409.709          | 73.17806 | 77.49248 |
| 1410.192          | 73.17506 | 77.45732 |
| 1410.674          | 73.17357 | 77.42426 |
| 1411.156          | 73.17374 | 77.3937  |
| 1411.638          | 73.17604 | 77.36659 |
| 1412.12           | 73.18109 | 77.34445 |
| 1412.602          | 73.18848 | 77.32603 |
| 1413.084          | 73.19797 | 77.31059 |
| 1413.566          | 73.20959 | 77.29801 |
| 1414.048          | 73.2233  | 77.28792 |
| 1414.531          | 73.2391  | 77.28034 |
| 1415.013          | 73.257   | 77.27531 |
| 1415.495          | 73.27683 | 77.27247 |
| 1415.977          | 73.29816 | 77.27128 |
| 1416.459          | 73.32161 | 77.27233 |
| 1416.941          | 73.34761 | 77.27599 |
| 1417.423          | 73.37623 | 77.28233 |
| 1417.905          | 73.40753 | 77.29144 |
| 1418.388          | 73.44203 | 77.30357 |
| 1418.87           | 73.48    | 77.31887 |
| 1419.352          | 73.52228 | 77.33779 |
| 1419.834          | 73.57031 | 77.36119 |
| 1420.316          | 73.62263 | 77.38822 |
| 1420.798          | 73.67833 | 77.41833 |
| 1421.28           | 73.73712 | 77.45136 |
| 1421.762          | 73.79844 | 77.48701 |
| 1422.245          | 73.86218 | 77.52519 |
| 1422.727          | 73.92826 | 77.56582 |
| 1423.209          | 73.99617 | 77.6086  |
| 1423.691          | 74.06526 | 77.65302 |
| 1424.173          | 74.13591 | 77.69944 |
| 1424.655          | 74.2083  | 77.74802 |
| 1425.137          | 74.28236 | 77.79871 |
| 1425.619          | 74.35806 | 77.85148 |
| 1426.101          | 74.43543 | 77.90644 |
| 1426.584          | 74.5144  | 77.96362 |
| 1427.066          | 74.59519 | 78.02333 |
| 1427.548          | 74.67827 | 78.08617 |
| 1428.03           | 74.76289 | 78.15134 |
| 1428.512          | 74.84853 | 78.21827 |
| 1428.994          | 74.93491 | 78.28671 |
| 1429.476          | 75.02154 | 78.35626 |
| 1429.958          | 75.10841 | 78.4268  |
| 1430.441          | 75.19535 | 78.49822 |
| 1430.923          | 75.28225 | 78.57022 |
| 1431.405          | 75.36908 | 78.64255 |
| 1431.887          | 75.45536 | 78.71509 |
| 1432.369          | 75.54065 | 78.78769 |
| 1432.851          | 75.62477 | 78.86023 |
| 1433.333          | 75.70766 | 78.93261 |
| 1433.815          | 75.7886  | 79.00454 |
| 1434.297          | 75.86718 | 79.07579 |
| 1434.78           | 75.94237 | 79.14602 |

| Wavenumber (cm-1) | After    | Before   |
|-------------------|----------|----------|
| 1435.262          | 76.01251 | 79.21475 |
| 1435.744          | 76.07909 | 79.28217 |
| 1436.226          | 76.14295 | 79.3484  |
| 1436.708          | 76.2043  | 79.41332 |
| 1437.19           | 76.26363 | 79.47677 |
| 1437.672          | 76.32094 | 79.53886 |
| 1438.154          | 76.37624 | 79.59954 |
| 1438.636          | 76.42994 | 79.65912 |
| 1439.119          | 76.48268 | 79.71822 |
| 1439.601          | 76.53391 | 79.77583 |
| 1440.083          | 76.58329 | 79.83119 |
| 1440.565          | 76.63081 | 79.88417 |
| 1441.047          | 76.67637 | 79.93479 |
| 1441.529          | 76.71983 | 79.982   |
| 1442.011          | 76.76112 | 80.02528 |
| 1442.493          | 76.79982 | 80.06296 |
| 1442.976          | 76.83527 | 80.09218 |
| 1443.458          | 76.86824 | 80.11591 |
| 1443.94           | 76.89928 | 80.13601 |
| 1444.422          | 76.92854 | 80.15312 |
| 1444.904          | 76.9563  | 80.16847 |
| 1445.386          | 76.98276 | 80.18215 |
| 1445.868          | 77.00804 | 80.19439 |
| 1446.35           | 77.03263 | 80.20598 |
| 1446.833          | 77.05722 | 80.21792 |
| 1447.315          | 77.08127 | 80.22995 |
| 1447.797          | 77.10441 | 80.24207 |
| 1448.279          | 77.12673 | 80.25444 |
| 1448.761          | 77.14839 | 80.2671  |
| 1449.243          | 77.16894 | 80.28054 |
| 1449.725          | 77.18826 | 80.29517 |
| 1450.207          | 77.20551 | 80.31145 |
| 1450.689          | 77.21916 | 80.33003 |
| 1451.172          | 77.23119 | 80.3507  |
| 1451.654          | 77.24282 | 80.37344 |
| 1452.136          | 77.25464 | 80.39839 |
| 1452.618          | 77.26759 | 80.42561 |
| 1453.1            | 77.28182 | 80.45529 |
| 1453.582          | 77.29764 | 80.48766 |
| 1454.064          | 77.31566 | 80.52278 |
| 1454.546          | 77.33648 | 80.5607  |
| 1455.028          | 77.36029 | 80.60174 |
| 1455.511          | 77.38737 | 80.64622 |
| 1455.993          | 77.41799 | 80.69434 |
| 1456.475          | 77.45231 | 80.74632 |
| 1456.957          | 77.49099 | 80.80241 |
| 1457.439          | 77.5345  | 80.86283 |
| 1457.921          | 77.58356 | 80.92789 |
| 1458.403          | 77.63927 | 80.99797 |
| 1458.885          | 77.7011  | 81.07308 |
| 1459.368          | 77.76877 | 81.15321 |
| 1459.85           | 77.84256 | 81.23864 |
| 1460.332          | 77.92277 | 81.3298  |
| 1460.814          | 78.00909 | 81.42635 |
| 1461.296          | 78.10161 | 81.52835 |

| Wavenumber (cm-1) | After    | Before   |
|-------------------|----------|----------|
| 1461.778          | 78.19952 | 81.63519 |
| 1462.26           | 78.30131 | 81.74565 |
| 1462.742          | 78.40933 | 81.86167 |
| 1463.224          | 78.52541 | 81.98475 |
| 1463.707          | 78.6497  | 82.11503 |
| 1464.189          | 78.7822  | 82.25239 |
| 1464.671          | 78.92535 | 82.39902 |
| 1465.153          | 79.08032 | 82.5559  |
| 1465.635          | 79.25114 | 82.72653 |
| 1466.117          | 79.44463 | 82.91683 |
| 1466.599          | 79.65351 | 83.12043 |
| 1467.081          | 79.87337 | 83.33346 |
| 1467.563          | 80.10254 | 83.55447 |
| 1468.046          | 80.33788 | 83.7808  |
| 1468.528          | 80.57932 | 84.01223 |
| 1469.01           | 80.82633 | 84.24823 |
| 1469.492          | 81.07714 | 84.48702 |
| 1469.974          | 81.32984 | 84.72649 |
| 1470.456          | 81.5844  | 84.9671  |
| 1470.938          | 81.84026 | 85.2088  |
| 1471.42           | 82.09698 | 85.45112 |
| 1471.903          | 82.3546  | 85.69401 |
| 1472.385          | 82.61106 | 85.93626 |
| 1472.867          | 82.86508 | 86.17703 |
| 1473.349          | 83.11432 | 86.41524 |
| 1473.831          | 83.35503 | 86.64941 |
| 1474.313          | 83.59003 | 86.87996 |
| 1474.795          | 83.82085 | 87.10697 |
| 1475.277          | 84.04764 | 87.32992 |
| 1475.76           | 84.27116 | 87.54831 |
| 1476.242          | 84.49111 | 87.76219 |
| 1476.724          | 84.70725 | 87.97123 |
| 1477.206          | 84.92019 | 88.17603 |
| 1477.688          | 85.13087 | 88.37798 |
| 1478.17           | 85.33797 | 88.57434 |
| 1478.652          | 85.54055 | 88.76296 |
| 1479.134          | 85.7383  | 88.94341 |
| 1479.616          | 85.93078 | 89.11549 |
| 1480.099          | 86.11745 | 89.27634 |
| 1480.581          | 86.29794 | 89.42454 |
| 1481.063          | 86.47125 | 89.55565 |
| 1481.545          | 86.63587 | 89.66232 |
| 1482.027          | 86.79298 | 89.75187 |
| 1482.509          | 86.9433  | 89.82868 |
| 1482.991          | 87.08674 | 89.8942  |
| 1483.473          | 87.22337 | 89.95144 |
| 1483.955          | 87.35358 | 90.00025 |
| 1484.438          | 87.47741 | 90.04097 |
| 1484.92           | 87.59586 | 90.07526 |
| 1485.402          | 87.71066 | 90.10507 |
| 1485.884          | 87.8196  | 90.12994 |
| 1486.366          | 87.921   | 90.15005 |
| 1486.848          | 88.01482 | 90.16564 |
| 1487.33           | 88.1012  | 90.17645 |
| 1487.812          | 88.17793 | 90.18414 |

| Wavenumber (cm-1) | After    | Before   |
|-------------------|----------|----------|
| 1488.295          | 88.24408 | 90.18968 |
| 1488.777          | 88.29601 | 90.19488 |
| 1489.259          | 88.32742 | 90.20269 |
| 1489.741          | 88.34525 | 90.21072 |
| 1490.223          | 88.35377 | 90.21761 |
| 1490.705          | 88.35479 | 90.22317 |
| 1491.187          | 88.35168 | 90.2267  |
| 1491.669          | 88.34417 | 90.2283  |
| 1492.151          | 88.33273 | 90.22805 |
| 1492.634          | 88.31842 | 90.22526 |
| 1493.116          | 88.30188 | 90.21887 |
| 1493.598          | 88.28497 | 90.21011 |
| 1494.08           | 88.26958 | 90.19981 |
| 1494.562          | 88.25623 | 90.1881  |
| 1495.044          | 88.24472 | 90.17523 |
| 1495.526          | 88.23912 | 90.1618  |
| 1496.008          | 88.24153 | 90.1481  |
| 1496.49           | 88.25757 | 90.13532 |
| 1496.973          | 88.29654 | 90.12534 |
| 1497.455          | 88.34949 | 90.11622 |
| 1497.937          | 88.41113 | 90.10682 |
| 1498.419          | 88.47979 | 90.09672 |
| 1498.901          | 88.55205 | 90.08511 |
| 1499.383          | 88.62802 | 90.07203 |
| 1499.865          | 88.70744 | 90.05737 |
| 1500.347          | 88.78815 | 90.04076 |
| 1500.83           | 88.86754 | 90.02171 |
| 1501.312          | 88.94676 | 90.00025 |
| 1501.794          | 89.02618 | 89.97622 |
| 1502.276          | 89.10564 | 89.94953 |
| 1502.758          | 89.18552 | 89.92027 |
| 1503.24           | 89.26451 | 89.88786 |
| 1503.722          | 89.3418  | 89.85197 |
| 1504.204          | 89.41628 | 89.81191 |
| 1504.687          | 89.48611 | 89.76653 |
| 1505.169          | 89.55254 | 89.71687 |
| 1505.651          | 89.61613 | 89.66347 |
| 1506.133          | 89.67688 | 89.60647 |
| 1506.615          | 89.73497 | 89.54617 |
| 1507.097          | 89.79026 | 89.48261 |
| 1507.579          | 89.84258 | 89.4158  |
| 1508.061          | 89.8922  | 89.34612 |
| 1508.543          | 89.93972 | 89.27413 |
| 1509.026          | 89.98414 | 89.19927 |
| 1509.508          | 90.02473 | 89.12116 |
| 1509.99           | 90.06127 | 89.03977 |
| 1510.472          | 90.0935  | 88.95506 |
| 1510.954          | 90.12075 | 88.86671 |
| 1511.436          | 90.14264 | 88.77456 |
| 1511.918          | 90.15807 | 88.67797 |
| 1512.4            | 90.1653  | 88.57578 |
| 1512.882          | 90.16584 | 88.46929 |
| 1513.365          | 90.16062 | 88.35931 |
| 1513.847          | 90.14977 | 88.24616 |
| 1514.329          | 90.13374 | 88.1303  |

| Wavenumber (cm-1) | After    | Before   |
|-------------------|----------|----------|
| 1514.811          | 90.11261 | 88.01193 |
| 1515.293          | 90.08643 | 87.89123 |
| 1515.775          | 90.05582 | 87.76873 |
| 1516.257          | 90.02174 | 87.64515 |
| 1516.739          | 89.98318 | 87.52007 |
| 1517.222          | 89.93944 | 87.3933  |
| 1517.704          | 89.89052 | 87.26495 |
| 1518.186          | 89.83638 | 87.13513 |
| 1518.668          | 89.77633 | 87.0037  |
| 1519.15           | 89.71009 | 86.87071 |
| 1519.632          | 89.63639 | 86.73573 |
| 1520.114          | 89.55302 | 86.59789 |
| 1520.596          | 89.46247 | 86.4585  |
| 1521.078          | 89.36628 | 86.3184  |
| 1521.561          | 89.26511 | 86.17806 |
| 1522.043          | 89.16016 | 86.03823 |
| 1522.525          | 89.05138 | 85.89898 |
| 1523.007          | 88.93898 | 85.76051 |
| 1523.489          | 88.82343 | 85.62308 |
| 1523.971          | 88.70509 | 85.48671 |
| 1524.453          | 88.58449 | 85.35217 |
| 1524.935          | 88.46223 | 85.22009 |
| 1525.417          | 88.33853 | 85.09073 |
| 1525.9            | 88.21336 | 84.96419 |
| 1526.382          | 88.08804 | 84.84156 |
| 1526.864          | 87.96326 | 84.7235  |
| 1527.346          | 87.84075 | 84.61158 |
| 1527.828          | 87.72342 | 84.50832 |
| 1528.31           | 87.60862 | 84.41149 |
| 1528.792          | 87.49482 | 84.31975 |
| 1529.274          | 87.38159 | 84.23279 |
| 1529.757          | 87.26794 | 84.14982 |
| 1530.239          | 87.15403 | 84.0709  |
| 1530.721          | 87.03983 | 83.99603 |
| 1531.203          | 86.9248  | 83.92466 |
| 1531.685          | 86.80833 | 83.85601 |
| 1532.167          | 86.6907  | 83.79069 |
| 1532.649          | 86.57202 | 83.72906 |
| 1533.131          | 86.45232 | 83.67115 |
| 1533.614          | 86.33177 | 83.61712 |
| 1534.096          | 86.20995 | 83.56696 |
| 1534.578          | 86.08661 | 83.52066 |
| 1535.06           | 85.96127 | 83.47843 |
| 1535.542          | 85.83312 | 83.44061 |
| 1536.024          | 85.70296 | 83.40677 |
| 1536.506          | 85.57133 | 83.37666 |
| 1536.988          | 85.43835 | 83.35016 |
| 1537.47           | 85.30443 | 83.32711 |
| 1537.953          | 85.16949 | 83.30746 |
| 1538.435          | 85.03359 | 83.29112 |
| 1538.917          | 84.89689 | 83.27792 |
| 1539.399          | 84.75953 | 83.26758 |
| 1539.881          | 84.62154 | 83.26025 |
| 1540.363          | 84.48302 | 83.25599 |
| 1540.845          | 84.34398 | 83.25475 |



| Wavenumber (cm-1) | After    | Before   |
|-------------------|----------|----------|
| 1541.327          | 84.2044  | 83.25648 |
| 1541.809          | 84.06456 | 83.26122 |
| 1542.292          | 83.92462 | 83.26897 |
| 1542.774          | 83.78495 | 83.27987 |
| 1543.256          | 83.64619 | 83.29423 |
| 1543.738          | 83.50772 | 83.31159 |
| 1544.22           | 83.36919 | 83.3316  |
| 1544.702          | 83.23051 | 83.3541  |
| 1545.184          | 83.0915  | 83.37891 |
| 1545.666          | 82.9521  | 83.40589 |
| 1546.149          | 82.81226 | 83.4349  |
| 1546.631          | 82.67171 | 83.46568 |
| 1547.113          | 82.53008 | 83.49786 |
| 1547.595          | 82.3877  | 83.5316  |
| 1548.077          | 82.24484 | 83.56698 |
| 1548.559          | 82.10148 | 83.60389 |
| 1549.041          | 81.9576  | 83.64222 |
| 1549.523          | 81.81343 | 83.68205 |
| 1550.005          | 81.66908 | 83.72335 |
| 1550.488          | 81.52501 | 83.76637 |
| 1550.97           | 81.38208 | 83.81159 |
| 1551.452          | 81.23927 | 83.85822 |
| 1551.934          | 81.09596 | 83.90574 |
| 1552.416          | 80.95184 | 83.95382 |
| 1552.898          | 80.8063  | 84.00202 |
| 1553.38           | 80.65949 | 84.05025 |
| 1553.862          | 80.51134 | 84.09838 |
| 1554.344          | 80.3619  | 84.14625 |
| 1554.827          | 80.21143 | 84.19376 |
| 1555.309          | 80.05911 | 84.2405  |
| 1555.791          | 79.90427 | 84.28606 |
| 1556.273          | 79.74683 | 84.33027 |
| 1556.755          | 79.58685 | 84.37306 |
| 1557.237          | 79.42313 | 84.41377 |
| 1557.719          | 79.25511 | 84.452   |
| 1558.201          | 79.08099 | 84.48684 |
| 1558.684          | 78.89775 | 84.51684 |
| 1559.166          | 78.70849 | 84.54324 |
| 1559.648          | 78.51513 | 84.56674 |
| 1560.13           | 78.31837 | 84.58753 |
| 1560.612          | 78.11957 | 84.60597 |
| 1561.094          | 77.91866 | 84.62203 |
| 1561.576          | 77.71582 | 84.63566 |
| 1562.058          | 77.51172 | 84.64712 |
| 1562.541          | 77.30704 | 84.65677 |
| 1563.023          | 77.10191 | 84.66431 |
| 1563.505          | 76.89662 | 84.66953 |
| 1563.987          | 76.69135 | 84.67237 |
| 1564.469          | 76.48598 | 84.67273 |
| 1564.951          | 76.28156 | 84.67063 |
| 1565.433          | 76.07867 | 84.66608 |
| 1565.915          | 75.87859 | 84.65902 |
| 1566.397          | 75.68343 | 84.64942 |
| 1566.88           | 75.49133 | 84.63728 |
| 1567.362          | 75.30125 | 84.62261 |

| Wavenumber (cm-1) | After    | Before   |
|-------------------|----------|----------|
| 1567.844          | 75.11287 | 84.60535 |
| 1568.326          | 74.92547 | 84.58543 |
| 1568.808          | 74.73927 | 84.56294 |
| 1569.29           | 74.55434 | 84.53789 |
| 1569.772          | 74.37047 | 84.51042 |
| 1570.254          | 74.18753 | 84.48081 |
| 1570.736          | 74.00541 | 84.44867 |
| 1571.219          | 73.82396 | 84.41368 |
| 1571.701          | 73.64323 | 84.37585 |
| 1572.183          | 73.46346 | 84.33521 |
| 1572.665          | 73.28397 | 84.29131 |
| 1573.147          | 73.10444 | 84.24397 |
| 1573.629          | 72.92389 | 84.19243 |
| 1574.111          | 72.74059 | 84.13547 |
| 1574.593          | 72.55648 | 84.07445 |
| 1575.076          | 72.3728  | 84.01023 |
| 1575.558          | 72.19009 | 83.94314 |
| 1576.04           | 72.00929 | 83.87383 |
| 1576.522          | 71.83036 | 83.8023  |
| 1577.004          | 71.65348 | 83.72863 |
| 1577.486          | 71.47899 | 83.65313 |
| 1577.968          | 71.30714 | 83.57604 |
| 1578.45           | 71.1384  | 83.49756 |
| 1578.932          | 70.97328 | 83.41793 |
| 1579.415          | 70.81195 | 83.33726 |
| 1579.897          | 70.65439 | 83.25554 |
| 1580.379          | 70.50166 | 83.17337 |
| 1580.861          | 70.35436 | 83.0911  |
| 1581.343          | 70.21396 | 83.0095  |
| 1581.825          | 70.08283 | 82.92986 |
| 1582.307          | 69.95877 | 82.85106 |
| 1582.789          | 69.84047 | 82.77242 |
| 1583.271          | 69.72758 | 82.69377 |
| 1583.754          | 69.61925 | 82.61466 |
| 1584.236          | 69.51554 | 82.53523 |
| 1584.718          | 69.41644 | 82.45545 |
| 1585.2            | 69.32141 | 82.37515 |
| 1585.682          | 69.22977 | 82.29412 |
| 1586.164          | 69.1419  | 82.21245 |
| 1586.646          | 69.05804 | 82.13014 |
| 1587.128          | 68.97816 | 82.04722 |
| 1587.611          | 68.9024  | 81.9638  |
| 1588.093          | 68.83057 | 81.87962 |
| 1588.575          | 68.76251 | 81.79455 |
| 1589.057          | 68.69816 | 81.70828 |
| 1589.539          | 68.63734 | 81.62019 |
| 1590.021          | 68.5801  | 81.53094 |
| 1590.503          | 68.52647 | 81.44094 |
| 1590.985          | 68.47643 | 81.35039 |
| 1591.468          | 68.43004 | 81.25962 |
| 1591.95           | 68.38715 | 81.16856 |
| 1592.432          | 68.34768 | 81.07727 |
| 1592.914          | 68.31149 | 80.98579 |
| 1593.396          | 68.27832 | 80.89405 |
| 1593.878          | 68.24841 | 80.80237 |

| Wavenumber (cm-1) | After    | Before   |
|-------------------|----------|----------|
| 1594.36           | 68.22195 | 80.71106 |
| 1594.842          | 68.1989  | 80.62015 |
| 1595.324          | 68.17915 | 80.52961 |
| 1595.807          | 68.163   | 80.44    |
| 1596.289          | 68.1506  | 80.35157 |
| 1596.771          | 68.14249 | 80.26516 |
| 1597.253          | 68.13973 | 80.18211 |
| 1597.735          | 68.14104 | 80.10105 |
| 1598.217          | 68.14563 | 80.02111 |
| 1598.699          | 68.15315 | 79.94203 |
| 1599.181          | 68.16303 | 79.86324 |
| 1599.663          | 68.17515 | 79.78474 |
| 1600.146          | 68.18936 | 79.7064  |
| 1600.628          | 68.20528 | 79.62786 |
| 1601.11           | 68.22249 | 79.54867 |
| 1601.592          | 68.24093 | 79.46899 |
| 1602.074          | 68.26047 | 79.38886 |
| 1602.556          | 68.28095 | 79.30822 |
| 1603.038          | 68.30229 | 79.22709 |
| 1603.52           | 68.32411 | 79.14525 |
| 1604.003          | 68.34616 | 79.06257 |
| 1604.485          | 68.36804 | 78.97891 |
| 1604.967          | 68.38917 | 78.89407 |
| 1605.449          | 68.40978 | 78.80805 |
| 1605.931          | 68.43    | 78.72085 |
| 1606.413          | 68.44971 | 78.63234 |
| 1606.895          | 68.46889 | 78.54238 |
| 1607.377          | 68.48744 | 78.45104 |
| 1607.859          | 68.50523 | 78.35825 |
| 1608.342          | 68.52226 | 78.26418 |
| 1608.824          | 68.53865 | 78.16917 |
| 1609.306          | 68.55401 | 78.0726  |
| 1609.788          | 68.56804 | 77.97398 |
| 1610.27           | 68.5806  | 77.87322 |
| 1610.752          | 68.59158 | 77.77032 |
| 1611.234          | 68.60063 | 77.66458 |
| 1611.716          | 68.6076  | 77.5557  |
| 1612.198          | 68.61204 | 77.44254 |
| 1612.681          | 68.61331 | 77.3233  |
| 1613.163          | 68.61187 | 77.19987 |
| 1613.645          | 68.60793 | 77.07339 |
| 1614.127          | 68.60146 | 76.94426 |
| 1614.609          | 68.59249 | 76.81318 |
| 1615.091          | 68.58108 | 76.68027 |
| 1615.573          | 68.56717 | 76.54568 |
| 1616.055          | 68.55101 | 76.41006 |
| 1616.538          | 68.53303 | 76.27425 |
| 1617.02           | 68.5126  | 76.13778 |
| 1617.502          | 68.48923 | 76.00037 |
| 1617.984          | 68.46288 | 75.86215 |
| 1618.466          | 68.43349 | 75.72315 |
| 1618.948          | 68.40051 | 75.58332 |
| 1619.43           | 68.36366 | 75.44275 |
| 1619.912          | 68.32201 | 75.30111 |
| 1620.395          | 68.27397 | 75.15777 |

| Wavenumber (cm-1) | After    | Before   |
|-------------------|----------|----------|
| 1620.877          | 68.2212  | 75.01375 |
| 1621.359          | 68.16469 | 74.86976 |
| 1621.841          | 68.1048  | 74.72619 |
| 1622.323          | 68.04215 | 74.5837  |
| 1622.805          | 67.97684 | 74.44232 |
| 1623.287          | 67.90899 | 74.30223 |
| 1623.769          | 67.8391  | 74.16358 |
| 1624.251          | 67.76781 | 74.0263  |
| 1624.734          | 67.69484 | 73.89116 |
| 1625.216          | 67.62007 | 73.75884 |
| 1625.698          | 67.54361 | 73.62951 |
| 1626.18           | 67.46548 | 73.50327 |
| 1626.662          | 67.3858  | 73.38122 |
| 1627.144          | 67.30472 | 73.26392 |
| 1627.626          | 67.22223 | 73.15296 |
| 1628.108          | 67.13824 | 73.05081 |
| 1628.59           | 67.05314 | 72.95519 |
| 1629.073          | 66.96721 | 72.86472 |
| 1629.555          | 66.88066 | 72.77905 |
| 1630.037          | 66.7938  | 72.69736 |
| 1630.519          | 66.70667 | 72.61966 |
| 1631.001          | 66.61945 | 72.54589 |
| 1631.483          | 66.53223 | 72.4754  |
| 1631.965          | 66.44507 | 72.40725 |
| 1632.447          | 66.35831 | 72.34217 |
| 1632.93           | 66.27227 | 72.28057 |
| 1633.412          | 66.1871  | 72.22245 |
| 1633.894          | 66.10291 | 72.16789 |
| 1634.376          | 66.02013 | 72.11703 |
| 1634.858          | 65.93907 | 72.06986 |
| 1635.34           | 65.86034 | 72.02678 |
| 1635.822          | 65.7849  | 71.98856 |
| 1636.304          | 65.71201 | 71.95422 |
| 1636.786          | 65.64127 | 71.92319 |
| 1637.269          | 65.57261 | 71.89514 |
| 1637.751          | 65.5058  | 71.8695  |
| 1638.233          | 65.44098 | 71.84638 |
| 1638.715          | 65.3782  | 71.82568 |
| 1639.197          | 65.31735 | 71.80743 |
| 1639.679          | 65.25829 | 71.79185 |
| 1640.161          | 65.2012  | 71.77815 |
| 1640.643          | 65.14623 | 71.76569 |
| 1641.125          | 65.09345 | 71.75434 |
| 1641.608          | 65.04298 | 71.74415 |
| 1642.09           | 64.99479 | 71.73396 |
| 1642.572          | 64.94889 | 71.72322 |
| 1643.054          | 64.90527 | 71.71025 |
| 1643.536          | 64.86383 | 71.69216 |
| 1644.018          | 64.82478 | 71.67188 |
| 1644.5            | 64.78832 | 71.65115 |
| 1644.982          | 64.75452 | 71.63056 |
| 1645.465          | 64.72345 | 71.61124 |
| 1645.947          | 64.69527 | 71.59328 |
| 1646.429          | 64.67008 | 71.57686 |
| 1646.911          | 64.64811 | 71.56284 |

| Wavenumber (cm-1) | After    | Before   |
|-------------------|----------|----------|
| 1647.393          | 64.62968 | 71.55228 |
| 1647.875          | 64.61459 | 71.54468 |
| 1648.357          | 64.60265 | 71.53985 |
| 1648.839          | 64.59397 | 71.53792 |
| 1649.322          | 64.58864 | 71.53889 |
| 1649.804          | 64.58643 | 71.54301 |
| 1650.286          | 64.58727 | 71.5505  |
| 1650.768          | 64.59071 | 71.56142 |
| 1651.25           | 64.59588 | 71.57568 |
| 1651.732          | 64.60393 | 71.59381 |
| 1652.214          | 64.61557 | 71.61617 |
| 1652.696          | 64.63122 | 71.64307 |
| 1653.178          | 64.65149 | 71.67495 |
| 1653.661          | 64.67637 | 71.71188 |
| 1654.143          | 64.706   | 71.75401 |
| 1654.625          | 64.74052 | 71.80135 |
| 1655.107          | 64.77991 | 71.85368 |
| 1655.589          | 64.82481 | 71.91188 |
| 1656.071          | 64.87579 | 71.97665 |
| 1656.553          | 64.933   | 72.04821 |
| 1657.035          | 64.99648 | 72.12667 |
| 1657.517          | 65.06723 | 72.21306 |
| 1658              | 65.1458  | 72.30796 |
| 1658.482          | 65.23363 | 72.41292 |
| 1658.964          | 65.3331  | 72.53047 |
| 1659.446          | 65.44196 | 72.65823 |
| 1659.928          | 65.55885 | 72.79482 |
| 1660.41           | 65.68337 | 72.9399  |
| 1660.892          | 65.8147  | 73.09277 |
| 1661.374          | 65.95284 | 73.25322 |
| 1661.857          | 66.09767 | 73.42115 |
| 1662.339          | 66.24858 | 73.59564 |
| 1662.821          | 66.40469 | 73.77528 |
| 1663.303          | 66.56656 | 73.96139 |
| 1663.785          | 66.73451 | 74.15476 |
| 1664.267          | 66.90849 | 74.35539 |
| 1664.749          | 67.08858 | 74.56327 |
| 1665.231          | 67.27476 | 74.77914 |
| 1665.714          | 67.46695 | 75.0033  |
| 1666.196          | 67.66538 | 75.23724 |
| 1666.678          | 67.87049 | 75.48363 |
| 1667.16           | 68.08159 | 75.73933 |
| 1667.642          | 68.29822 | 76.00234 |
| 1668.124          | 68.52019 | 76.2718  |
| 1668.606          | 68.74722 | 76.5462  |
| 1669.088          | 68.97908 | 76.82543 |
| 1669.57           | 69.21557 | 77.10914 |
| 1670.052          | 69.45626 | 77.39658 |
| 1670.535          | 69.70051 | 77.68702 |
| 1671.017          | 69.94869 | 77.97999 |
| 1671.499          | 70.20102 | 78.27488 |
| 1671.981          | 70.45734 | 78.57136 |
| 1672.463          | 70.71745 | 78.86933 |
| 1672.945          | 70.9817  | 79.16744 |
| 1673.427          | 71.25006 | 79.46485 |

| Wavenumber (cm-1) | After    | Before   |
|-------------------|----------|----------|
| 1673.909          | 71.52319 | 79.75987 |
| 1674.392          | 71.80229 | 80.04979 |
| 1674.874          | 72.08566 | 80.33675 |
| 1675.356          | 72.37219 | 80.62191 |
| 1675.838          | 72.6613  | 80.9055  |
| 1676.32           | 72.95206 | 81.18825 |
| 1676.802          | 73.24437 | 81.4698  |
| 1677.284          | 73.53796 | 81.74999 |
| 1677.766          | 73.83241 | 82.02909 |
| 1678.249          | 74.12745 | 82.30737 |
| 1678.731          | 74.42245 | 82.5845  |
| 1679.213          | 74.71683 | 82.86031 |
| 1679.695          | 75.01025 | 83.13462 |
| 1680.177          | 75.30261 | 83.40705 |
| 1680.659          | 75.59282 | 83.67797 |
| 1681.141          | 75.8802  | 83.94744 |
| 1681.623          | 76.1633  | 84.21597 |
| 1682.105          | 76.43979 | 84.48451 |
| 1682.588          | 76.71158 | 84.75169 |
| 1683.07           | 76.97971 | 85.01663 |
| 1683.552          | 77.24446 | 85.27887 |
| 1684.034          | 77.50656 | 85.53782 |
| 1684.516          | 77.76563 | 85.79321 |
| 1684.998          | 78.02151 | 86.04475 |
| 1685.48           | 78.27429 | 86.2919  |
| 1685.962          | 78.52393 | 86.53393 |
| 1686.444          | 78.7706  | 86.77094 |
| 1686.927          | 79.01453 | 87.00292 |
| 1687.409          | 79.25555 | 87.22962 |
| 1687.891          | 79.49332 | 87.45084 |
| 1688.373          | 79.7287  | 87.66641 |
| 1688.855          | 79.96201 | 87.87609 |
| 1689.337          | 80.19454 | 88.07992 |
| 1689.819          | 80.42862 | 88.27808 |
| 1690.301          | 80.66144 | 88.46974 |
| 1690.784          | 80.89127 | 88.65438 |
| 1691.266          | 81.11725 | 88.8314  |
| 1691.748          | 81.33782 | 88.99987 |
| 1692.23           | 81.55322 | 89.16016 |
| 1692.712          | 81.7632  | 89.31215 |
| 1693.194          | 81.96756 | 89.4564  |
| 1693.676          | 82.16652 | 89.59432 |
| 1694.158          | 82.35853 | 89.72328 |
| 1694.641          | 82.54217 | 89.84114 |
| 1695.123          | 82.71716 | 89.94766 |
| 1695.605          | 82.88361 | 90.04293 |
| 1696.087          | 83.03893 | 90.12377 |
| 1696.569          | 83.18189 | 90.18867 |
| 1697.051          | 83.30877 | 90.23261 |
| 1697.533          | 83.41338 | 90.24715 |
| 1698.015          | 83.50187 | 90.24115 |
| 1698.497          | 83.578   | 90.22003 |
| 1698.979          | 83.6429  | 90.18572 |
| 1699.462          | 83.6989  | 90.14191 |
| 1699.944          | 83.74622 | 90.08877 |

| Wavenumber (cm-1) | After    | Before   |
|-------------------|----------|----------|
| 1700.426          | 83.78524 | 90.02695 |
| 1700.908          | 83.81784 | 89.95876 |
| 1701.39           | 83.84654 | 89.88696 |
| 1701.872          | 83.86984 | 89.81097 |
| 1702.354          | 83.88704 | 89.73094 |
| 1702.836          | 83.89838 | 89.64742 |
| 1703.319          | 83.90384 | 89.56038 |
| 1703.801          | 83.90348 | 89.47164 |
| 1704.283          | 83.89761 | 89.38243 |
| 1704.765          | 83.88559 | 89.29453 |
| 1705.247          | 83.86611 | 89.21065 |
| 1705.729          | 83.84145 | 89.1293  |
| 1706.211          | 83.81316 | 89.04986 |
| 1706.693          | 83.78214 | 88.97263 |
| 1707.176          | 83.74973 | 88.89767 |
| 1707.658          | 83.71622 | 88.82518 |
| 1708.14           | 83.68208 | 88.75555 |
| 1708.622          | 83.64791 | 88.68826 |
| 1709.104          | 83.61411 | 88.62222 |
| 1709.586          | 83.5818  | 88.55968 |
| 1710.068          | 83.55208 | 88.50239 |
| 1710.55           | 83.52547 | 88.45083 |
| 1711.032          | 83.50228 | 88.40543 |
| 1711.515          | 83.48427 | 88.36816 |
| 1711.997          | 83.4725  | 88.3401  |
| 1712.479          | 83.46935 | 88.32428 |
| 1712.961          | 83.47846 | 88.32568 |
| 1713.443          | 83.49698 | 88.33971 |
| 1713.925          | 83.52327 | 88.36373 |
| 1714.407          | 83.55724 | 88.397   |
| 1714.889          | 83.59824 | 88.43779 |
| 1715.371          | 83.64619 | 88.4863  |
| 1715.854          | 83.70119 | 88.54243 |
| 1716.336          | 83.76206 | 88.60515 |
| 1716.818          | 83.82688 | 88.67312 |
| 1717.3            | 83.89813 | 88.74712 |
| 1717.782          | 83.97755 | 88.82754 |
| 1718.264          | 84.06534 | 88.91435 |
| 1718.746          | 84.16171 | 89.00787 |
| 1719.229          | 84.26849 | 89.10761 |
| 1719.711          | 84.38657 | 89.2133  |
| 1720.193          | 84.51913 | 89.32459 |
| 1720.675          | 84.67158 | 89.44097 |
| 1721.157          | 84.8382  | 89.56281 |
| 1721.639          | 85.01552 | 89.69027 |
| 1722.121          | 85.20223 | 89.82353 |
| 1722.603          | 85.39593 | 89.96301 |
| 1723.085          | 85.59653 | 90.10812 |
| 1723.568          | 85.80367 | 90.2586  |
| 1724.05           | 86.01594 | 90.41367 |
| 1724.532          | 86.23184 | 90.57183 |
| 1725.014          | 86.45137 | 90.73496 |
| 1725.496          | 86.67415 | 90.90449 |
| 1725.978          | 86.89983 | 91.0803  |
| 1726.46           | 87.12846 | 91.26197 |

| Wavenumber (cm-1) | After    | Before   |
|-------------------|----------|----------|
| 1726.942          | 87.35844 | 91.45186 |
| 1727.424          | 87.58881 | 91.65088 |
| 1727.907          | 87.81775 | 91.86289 |
| 1728.389          | 88.04239 | 92.09463 |
| 1728.871          | 88.26491 | 92.33836 |
| 1729.353          | 88.48649 | 92.58933 |
| 1729.835          | 88.70726 | 92.84531 |
| 1730.317          | 88.92785 | 93.10232 |
| 1730.799          | 89.14798 | 93.36083 |
| 1731.281          | 89.36745 | 93.62025 |
| 1731.764          | 89.58667 | 93.87966 |
| 1732.246          | 89.80625 | 94.13903 |
| 1732.728          | 90.02533 | 94.3952  |
| 1733.21           | 90.24333 | 94.64523 |
| 1733.692          | 90.46001 | 94.88841 |
| 1734.174          | 90.67502 | 95.12502 |
| 1734.656          | 90.88813 | 95.34935 |
| 1735.138          | 91.09915 | 95.55846 |
| 1735.62           | 91.30765 | 95.74422 |
| 1736.103          | 91.51302 | 95.89301 |
| 1736.585          | 91.71555 | 96.01824 |
| 1737.067          | 91.91536 | 96.12779 |
| 1737.549          | 92.11234 | 96.22441 |
| 1738.031          | 92.30638 | 96.31365 |
| 1738.513          | 92.4975  | 96.39494 |
| 1738.995          | 92.68561 | 96.4687  |
| 1739.477          | 92.87088 | 96.53744 |
| 1739.959          | 93.05372 | 96.60378 |
| 1740.442          | 93.23338 | 96.66798 |
| 1740.924          | 93.40925 | 96.73104 |
| 1741.406          | 93.58124 | 96.79332 |
| 1741.888          | 93.74924 | 96.85407 |
| 1742.37           | 93.91254 | 96.91755 |
| 1742.852          | 94.07075 | 96.98598 |
| 1743.334          | 94.22272 | 97.06472 |
| 1743.816          | 94.36655 | 97.16277 |
| 1744.299          | 94.50413 | 97.27149 |
| 1744.781          | 94.63655 | 97.38581 |
| 1745.263          | 94.76418 | 97.50408 |
| 1745.745          | 94.88776 | 97.62282 |
| 1746.227          | 95.0073  | 97.74244 |
| 1746.709          | 95.12288 | 97.86276 |
| 1747.191          | 95.23497 | 97.98208 |
| 1747.673          | 95.34418 | 98.0986  |
| 1748.156          | 95.45024 | 98.21255 |
| 1748.638          | 95.55309 | 98.3236  |
| 1749.12           | 95.65277 | 98.43163 |
| 1749.602          | 95.74923 | 98.53716 |
| 1750.084          | 95.84273 | 98.63789 |
| 1750.566          | 95.93344 | 98.73262 |
| 1751.048          | 96.02155 | 98.81852 |
| 1751.53           | 96.10735 | 98.89082 |
| 1752.012          | 96.19073 | 98.95411 |
| 1752.495          | 96.27168 | 99.01116 |
| 1752.977          | 96.35026 | 99.06281 |



| Wavenumber (cm-1) | After    | Before    |
|-------------------|----------|-----------|
| 1753.459          | 96.4265  | 99.11089  |
| 1753.941          | 96.50049 | 99.15532  |
| 1754.423          | 96.57227 | 99.19622  |
| 1754.905          | 96.64184 | 99.23465  |
| 1755.387          | 96.70914 | 99.27184  |
| 1755.869          | 96.77441 | 99.30737  |
| 1756.351          | 96.83784 | 99.3412   |
| 1756.834          | 96.8995  | 99.37341  |
| 1757.316          | 96.95948 | 99.40379  |
| 1757.798          | 97.018   | 99.43321  |
| 1758.28           | 97.07517 | 99.4622   |
| 1758.762          | 97.13132 | 99.49167  |
| 1759.244          | 97.18691 | 99.52308  |
| 1759.726          | 97.24159 | 99.55521  |
| 1760.208          | 97.29514 | 99.5874   |
| 1760.691          | 97.34756 | 99.61953  |
| 1761.173          | 97.39869 | 99.65128  |
| 1761.655          | 97.44862 | 99.68265  |
| 1762.137          | 97.49738 | 99.71365  |
| 1762.619          | 97.54494 | 99.74384  |
| 1763.101          | 97.59122 | 99.77255  |
| 1763.583          | 97.63629 | 99.80059  |
| 1764.065          | 97.68021 | 99.8285   |
| 1764.547          | 97.72303 | 99.85634  |
| 1765.03           | 97.76481 | 99.88419  |
| 1765.512          | 97.80551 | 99.91258  |
| 1765.994          | 97.84512 | 99.94172  |
| 1766.476          | 97.88359 | 99.97257  |
| 1766.958          | 97.92082 | 100.0067  |
| 1767.44           | 97.957   | 100.04243 |
| 1767.922          | 97.99224 | 100.07873 |
| 1768.404          | 98.02663 | 100.11519 |
| 1768.886          | 98.06028 | 100.15097 |
| 1769.369          | 98.09319 | 100.18623 |
| 1769.851          | 98.1254  | 100.22085 |
| 1770.333          | 98.15692 | 100.25465 |
| 1770.815          | 98.18773 | 100.28755 |
| 1771.297          | 98.21799 | 100.31908 |
| 1771.779          | 98.24784 | 100.34869 |
| 1772.261          | 98.27731 | 100.37631 |
| 1772.743          | 98.30643 | 100.40202 |
| 1773.226          | 98.33541 | 100.42474 |
| 1773.708          | 98.36437 | 100.44395 |
| 1774.19           | 98.39366 | 100.45811 |
| 1774.672          | 98.42379 | 100.46467 |
| 1775.154          | 98.45428 | 100.46621 |
| 1775.636          | 98.4848  | 100.46426 |
| 1776.118          | 98.51528 | 100.45934 |
| 1776.6            | 98.54552 | 100.45252 |
| 1777.083          | 98.57552 | 100.44375 |
| 1777.565          | 98.60527 | 100.43315 |
| 1778.047          | 98.63464 | 100.42125 |
| 1778.529          | 98.66344 | 100.40868 |
| 1779.011          | 98.69178 | 100.3954  |
| 1779.493          | 98.71973 | 100.38154 |

| Wavenumber (cm-1) | After    | Before    |
|-------------------|----------|-----------|
| 1779.975          | 98.74727 | 100.3672  |
| 1780.457          | 98.77441 | 100.35227 |
| 1780.939          | 98.80113 | 100.33744 |
| 1781.422          | 98.8274  | 100.32313 |
| 1781.904          | 98.85322 | 100.31017 |
| 1782.386          | 98.87859 | 100.29988 |
| 1782.868          | 98.90348 | 100.29111 |
| 1783.35           | 98.92784 | 100.28317 |
| 1783.832          | 98.95164 | 100.2759  |
| 1784.314          | 98.97481 | 100.26888 |
| 1784.796          | 98.99738 | 100.26219 |
| 1785.278          | 99.01933 | 100.25584 |
| 1785.761          | 99.04066 | 100.24954 |
| 1786.243          | 99.06145 | 100.24297 |
| 1786.725          | 99.08157 | 100.23641 |
| 1787.207          | 99.10091 | 100.23003 |
| 1787.689          | 99.11944 | 100.22383 |
| 1788.171          | 99.13717 | 100.21794 |
| 1788.653          | 99.15395 | 100.2123  |
| 1789.135          | 99.1697  | 100.20692 |
| 1789.618          | 99.18419 | 100.20179 |
| 1790.1            | 99.19701 | 100.19695 |
| 1790.582          | 99.20857 | 100.1924  |
| 1791.064          | 99.21912 | 100.18811 |
| 1791.546          | 99.22872 | 100.1841  |
| 1792.028          | 99.23753 | 100.18038 |
| 1792.51           | 99.24554 | 100.1769  |
| 1792.992          | 99.25281 | 100.17368 |
| 1793.474          | 99.25944 | 100.17064 |
| 1793.957          | 99.26557 | 100.16764 |
| 1794.439          | 99.27115 | 100.16486 |
| 1794.921          | 99.27612 | 100.16242 |
| 1795.403          | 99.2805  | 100.16032 |
| 1795.885          | 99.28431 | 100.15853 |
| 1796.367          | 99.28754 | 100.15724 |
| 1796.849          | 99.29025 | 100.15652 |
| 1797.331          | 99.29242 | 100.15669 |
| 1797.813          | 99.29401 | 100.15827 |
| 1798.296          | 99.2951  | 100.16065 |
| 1798.778          | 99.29578 | 100.16349 |
| 1799.26           | 99.29609 | 100.16662 |
| 1799.742          | 99.2961  | 100.16975 |
| 1800.224          | 99.29584 | 100.17292 |
| 1800.706          | 99.2953  | 100.17607 |
| 1801.188          | 99.29448 | 100.17913 |
| 1801.67           | 99.29336 | 100.18205 |
| 1802.153          | 99.29208 | 100.18466 |
| 1802.635          | 99.29073 | 100.18676 |
| 1803.117          | 99.28934 | 100.18832 |
| 1803.599          | 99.28795 | 100.18933 |
| 1804.081          | 99.28671 | 100.18945 |
| 1804.563          | 99.28571 | 100.18847 |
| 1805.045          | 99.28522 | 100.18588 |
| 1805.527          | 99.28564 | 100.18079 |
| 1806.01           | 99.28659 | 100.17407 |

| Wavenumber (cm-1) | After    | Before    |
|-------------------|----------|-----------|
| 1806.492          | 99.28782 | 100.16618 |
| 1806.974          | 99.28925 | 100.15733 |
| 1807.456          | 99.2907  | 100.14784 |
| 1807.938          | 99.29222 | 100.13767 |
| 1808.42           | 99.2938  | 100.12682 |
| 1808.902          | 99.29538 | 100.11541 |
| 1809.384          | 99.29693 | 100.10354 |
| 1809.866          | 99.2984  | 100.09131 |
| 1810.349          | 99.29973 | 100.07882 |
| 1810.831          | 99.3009  | 100.06609 |
| 1811.313          | 99.30196 | 100.05306 |
| 1811.795          | 99.30274 | 100.04007 |
| 1812.277          | 99.30315 | 100.02731 |
| 1812.759          | 99.30292 | 100.01526 |
| 1813.241          | 99.30164 | 100.00475 |
| 1813.723          | 99.29975 | 99.99493  |
| 1814.205          | 99.29752 | 99.98528  |
| 1814.688          | 99.29507 | 99.97559  |
| 1815.17           | 99.29263 | 99.96541  |
| 1815.652          | 99.29014 | 99.95487  |
| 1816.134          | 99.2876  | 99.94398  |
| 1816.616          | 99.28499 | 99.93272  |
| 1817.098          | 99.28223 | 99.92123  |
| 1817.58           | 99.27958 | 99.90907  |
| 1818.062          | 99.27728 | 99.89584  |
| 1818.545          | 99.27536 | 99.88149  |
| 1819.027          | 99.27374 | 99.86611  |
| 1819.509          | 99.27289 | 99.84894  |
| 1819.991          | 99.27299 | 99.8296   |
| 1820.473          | 99.27471 | 99.80692  |
| 1820.955          | 99.27919 | 99.77888  |
| 1821.437          | 99.28522 | 99.74763  |
| 1821.919          | 99.29207 | 99.71446  |
| 1822.401          | 99.29944 | 99.67989  |
| 1822.884          | 99.30676 | 99.64497  |
| 1823.366          | 99.3141  | 99.60952  |
| 1823.848          | 99.32143 | 99.57367  |
| 1824.33           | 99.32858 | 99.53767  |
| 1824.812          | 99.33554 | 99.50166  |
| 1825.294          | 99.34193 | 99.46622  |
| 1825.776          | 99.3474  | 99.43194  |
| 1826.258          | 99.35188 | 99.39895  |
| 1826.74           | 99.35543 | 99.36714  |
| 1827.223          | 99.35729 | 99.33779  |
| 1827.705          | 99.3571  | 99.31155  |
| 1828.187          | 99.35375 | 99.29028  |
| 1828.669          | 99.34544 | 99.277    |
| 1829.151          | 99.33398 | 99.26869  |
| 1829.633          | 99.32048 | 99.2635   |
| 1830.115          | 99.30533 | 99.26078  |
| 1830.597          | 99.28931 | 99.25923  |
| 1831.08           | 99.27236 | 99.259    |
| 1831.562          | 99.25455 | 99.25996  |
| 1832.044          | 99.23621 | 99.26159  |
| 1832.526          | 99.21767 | 99.26338  |

| Wavenumber (cm-1) | After    | Before   |
|-------------------|----------|----------|
| 1833.008          | 99.19905 | 99.26509 |
| 1833.49           | 99.18056 | 99.26639 |
| 1833.972          | 99.16225 | 99.26717 |
| 1834.454          | 99.14403 | 99.2676  |
| 1834.937          | 99.12658 | 99.26653 |
| 1835.419          | 99.11024 | 99.26338 |
| 1835.901          | 99.09587 | 99.25665 |
| 1836.383          | 99.08489 | 99.24382 |
| 1836.865          | 99.07595 | 99.22734 |
| 1837.347          | 99.06824 | 99.20864 |
| 1837.829          | 99.06151 | 99.18822 |
| 1838.311          | 99.0552  | 99.16708 |
| 1838.793          | 99.04939 | 99.14511 |
| 1839.276          | 99.04405 | 99.12235 |
| 1839.758          | 99.0389  | 99.09924 |
| 1840.24           | 99.03361 | 99.0762  |
| 1840.722          | 99.02826 | 99.05331 |
| 1841.204          | 99.02284 | 99.03078 |
| 1841.686          | 99.01734 | 99.00866 |
| 1842.168          | 99.01183 | 98.98679 |
| 1842.65           | 99.00601 | 98.96599 |
| 1843.132          | 98.99969 | 98.94669 |
| 1843.615          | 98.99253 | 98.92993 |
| 1844.097          | 98.98389 | 98.91752 |
| 1844.579          | 98.97437 | 98.90767 |
| 1845.061          | 98.96431 | 98.89932 |
| 1845.543          | 98.9538  | 98.89214 |
| 1846.025          | 98.94305 | 98.88537 |
| 1846.507          | 98.93206 | 98.87906 |
| 1846.989          | 98.92087 | 98.87314 |
| 1847.472          | 98.90961 | 98.86724 |
| 1847.954          | 98.89853 | 98.86093 |
| 1848.436          | 98.88745 | 98.85427 |
| 1848.918          | 98.87631 | 98.84718 |
| 1849.4            | 98.86511 | 98.8396  |
| 1849.882          | 98.85383 | 98.83161 |
| 1850.364          | 98.84247 | 98.82275 |
| 1850.846          | 98.83102 | 98.81277 |
| 1851.328          | 98.81943 | 98.80111 |
| 1851.811          | 98.80756 | 98.78687 |
| 1852.293          | 98.79559 | 98.77087 |
| 1852.775          | 98.78365 | 98.75356 |
| 1853.257          | 98.77186 | 98.73501 |
| 1853.739          | 98.76035 | 98.71546 |
| 1854.221          | 98.74904 | 98.69495 |
| 1854.703          | 98.73794 | 98.67355 |
| 1855.185          | 98.72694 | 98.65157 |
| 1855.667          | 98.71581 | 98.62959 |
| 1856.15           | 98.70498 | 98.607   |
| 1856.632          | 98.69476 | 98.58342 |
| 1857.114          | 98.68522 | 98.55885 |
| 1857.596          | 98.67628 | 98.53328 |
| 1858.078          | 98.6685  | 98.5063  |
| 1858.56           | 98.66212 | 98.47772 |
| 1859.042          | 98.658   | 98.44679 |

| Wavenumber (cm-1) | After    | Before   |
|-------------------|----------|----------|
| 1859.524          | 98.6576  | 98.41216 |
| 1860.007          | 98.65936 | 98.37537 |
| 1860.489          | 98.66232 | 98.33733 |
| 1860.971          | 98.66607 | 98.29848 |
| 1861.453          | 98.66985 | 98.25959 |
| 1861.935          | 98.67378 | 98.22055 |
| 1862.417          | 98.67779 | 98.18147 |
| 1862.899          | 98.68168 | 98.14246 |
| 1863.381          | 98.68546 | 98.10346 |
| 1863.864          | 98.68858 | 98.06519 |
| 1864.346          | 98.69055 | 98.02825 |
| 1864.828          | 98.69126 | 97.99282 |
| 1865.31           | 98.69081 | 97.95879 |
| 1865.792          | 98.68813 | 97.92738 |
| 1866.274          | 98.68271 | 97.89918 |
| 1866.756          | 98.67305 | 97.87599 |
| 1867.238          | 98.65661 | 97.86075 |
| 1867.72           | 98.63594 | 97.85048 |
| 1868.203          | 98.61257 | 97.84342 |
| 1868.685          | 98.58704 | 97.83895 |
| 1869.167          | 98.56044 | 97.83581 |
| 1869.649          | 98.53267 | 97.8341  |
| 1870.131          | 98.50384 | 97.8337  |
| 1870.613          | 98.47446 | 97.83405 |
| 1871.095          | 98.44502 | 97.83452 |
| 1871.577          | 98.41563 | 97.83505 |
| 1872.059          | 98.38651 | 97.83535 |
| 1872.542          | 98.35778 | 97.83531 |
| 1873.024          | 98.32932 | 97.8351  |
| 1873.506          | 98.30199 | 97.8337  |
| 1873.988          | 98.27626 | 97.83062 |
| 1874.47           | 98.25321 | 97.82462 |
| 1874.952          | 98.23466 | 97.81365 |
| 1875.434          | 98.21889 | 97.79961 |
| 1875.916          | 98.20494 | 97.78364 |
| 1876.399          | 98.19251 | 97.76606 |
| 1876.881          | 98.18098 | 97.74759 |
| 1877.363          | 98.17038 | 97.72817 |
| 1877.845          | 98.16066 | 97.70785 |
| 1878.327          | 98.15141 | 97.68704 |
| 1878.809          | 98.14209 | 97.66629 |
| 1879.291          | 98.13303 | 97.64533 |
| 1879.773          | 98.12437 | 97.62404 |
| 1880.255          | 98.11613 | 97.60243 |
| 1880.738          | 98.10838 | 97.5804  |
| 1881.22           | 98.101   | 97.5582  |
| 1881.702          | 98.09389 | 97.53597 |
| 1882.184          | 98.08706 | 97.51396 |
| 1882.666          | 98.08044 | 97.4925  |
| 1883.148          | 98.07398 | 97.47132 |
| 1883.63           | 98.06762 | 97.45025 |
| 1884.112          | 98.06126 | 97.42925 |
| 1884.594          | 98.05482 | 97.40826 |
| 1885.077          | 98.0483  | 97.3873  |
| 1885.559          | 98.04167 | 97.36636 |

| Wavenumber (cm-1) | After    | Before   |
|-------------------|----------|----------|
| 1886.041          | 98.03499 | 97.34534 |
| 1886.523          | 98.02836 | 97.32408 |
| 1887.005          | 98.02151 | 97.30279 |
| 1887.487          | 98.01419 | 97.28159 |
| 1887.969          | 98.00637 | 97.2605  |
| 1888.451          | 97.99802 | 97.23955 |
| 1888.934          | 97.98882 | 97.21886 |
| 1889.416          | 97.97858 | 97.19849 |
| 1889.898          | 97.96677 | 97.17865 |
| 1890.38           | 97.95255 | 97.15971 |
| 1890.862          | 97.93677 | 97.14132 |
| 1891.344          | 97.91995 | 97.12322 |
| 1891.826          | 97.90229 | 97.1053  |
| 1892.308          | 97.88414 | 97.08742 |
| 1892.791          | 97.86547 | 97.06957 |
| 1893.273          | 97.84634 | 97.05178 |
| 1893.755          | 97.8269  | 97.03397 |
| 1894.237          | 97.80737 | 97.01614 |
| 1894.719          | 97.78776 | 96.99816 |
| 1895.201          | 97.76809 | 96.97997 |
| 1895.683          | 97.74841 | 96.96153 |
| 1896.165          | 97.72867 | 96.94286 |
| 1896.647          | 97.70914 | 96.92374 |
| 1897.13           | 97.68995 | 96.90405 |
| 1897.612          | 97.6714  | 96.88348 |
| 1898.094          | 97.65398 | 96.86149 |
| 1898.576          | 97.63726 | 96.83861 |
| 1899.058          | 97.62097 | 96.81518 |
| 1899.54           | 97.60504 | 96.79133 |
| 1900.022          | 97.58934 | 96.76729 |
| 1900.504          | 97.57384 | 96.74302 |
| 1900.986          | 97.55859 | 96.71854 |
| 1901.469          | 97.54345 | 96.69394 |
| 1901.951          | 97.52829 | 96.66929 |
| 1902.433          | 97.51321 | 96.64467 |
| 1902.915          | 97.49828 | 96.62015 |
| 1903.397          | 97.48351 | 96.59577 |
| 1903.879          | 97.46891 | 96.5715  |
| 1904.361          | 97.45448 | 96.54758 |
| 1904.843          | 97.44021 | 96.52414 |
| 1905.326          | 97.42609 | 96.50151 |
| 1905.808          | 97.41216 | 96.48026 |
| 1906.29           | 97.39841 | 96.45982 |
| 1906.772          | 97.38477 | 96.43987 |
| 1907.254          | 97.37128 | 96.42027 |
| 1907.736          | 97.35789 | 96.4008  |
| 1908.218          | 97.34461 | 96.38146 |
| 1908.7            | 97.33142 | 96.36226 |
| 1909.182          | 97.31828 | 96.34311 |
| 1909.665          | 97.30515 | 96.32394 |
| 1910.147          | 97.29205 | 96.30467 |
| 1910.629          | 97.27904 | 96.28523 |
| 1911.111          | 97.26612 | 96.26558 |
| 1911.593          | 97.25327 | 96.24577 |
| 1912.075          | 97.24052 | 96.22556 |

| Wavenumber (cm-1) | After    | Before   |
|-------------------|----------|----------|
| 1912.557          | 97.22793 | 96.20483 |
| 1913.039          | 97.21558 | 96.18324 |
| 1913.521          | 97.20367 | 96.16021 |
| 1914.004          | 97.19196 | 96.13632 |
| 1914.486          | 97.18033 | 96.11191 |
| 1914.968          | 97.16869 | 96.0871  |
| 1915.45           | 97.15692 | 96.06214 |
| 1915.932          | 97.14504 | 96.03701 |
| 1916.414          | 97.13304 | 96.01171 |
| 1916.896          | 97.12092 | 95.98634 |
| 1917.378          | 97.10872 | 95.96095 |
| 1917.861          | 97.09627 | 95.93565 |
| 1918.343          | 97.08345 | 95.91052 |
| 1918.825          | 97.07022 | 95.88555 |
| 1919.307          | 97.05661 | 95.86074 |
| 1919.789          | 97.04236 | 95.83634 |
| 1920.271          | 97.02735 | 95.81245 |
| 1920.753          | 97.01122 | 95.78941 |
| 1921.235          | 96.99336 | 95.76782 |
| 1921.718          | 96.97441 | 95.74709 |
| 1922.2            | 96.95471 | 95.72689 |
| 1922.682          | 96.93442 | 95.7071  |
| 1923.164          | 96.9138  | 95.68749 |
| 1923.646          | 96.89284 | 95.66805 |
| 1924.128          | 96.87156 | 95.64877 |
| 1924.61           | 96.85012 | 95.62955 |
| 1925.092          | 96.82865 | 95.61021 |
| 1925.574          | 96.80717 | 95.59079 |
| 1926.057          | 96.78571 | 95.57127 |
| 1926.539          | 96.76428 | 95.55163 |
| 1927.021          | 96.74289 | 95.53188 |
| 1927.503          | 96.7217  | 95.5119  |
| 1927.985          | 96.70081 | 95.4916  |
| 1928.467          | 96.68044 | 95.47082 |
| 1928.949          | 96.66093 | 95.4493  |
| 1929.431          | 96.64197 | 95.42725 |
| 1929.913          | 96.62341 | 95.40482 |
| 1930.396          | 96.60522 | 95.38201 |
| 1930.878          | 96.58734 | 95.35888 |
| 1931.36           | 96.56973 | 95.33546 |
| 1931.842          | 96.5524  | 95.31175 |
| 1932.324          | 96.53522 | 95.28784 |
| 1932.806          | 96.51797 | 95.26392 |
| 1933.288          | 96.50092 | 95.2398  |
| 1933.77           | 96.48419 | 95.21531 |
| 1934.253          | 96.46782 | 95.19047 |
| 1934.735          | 96.45179 | 95.16527 |
| 1935.217          | 96.4363  | 95.13955 |
| 1935.699          | 96.42142 | 95.11326 |
| 1936.181          | 96.40744 | 95.0861  |
| 1936.663          | 96.39491 | 95.0576  |
| 1937.145          | 96.38325 | 95.02831 |
| 1937.627          | 96.37209 | 94.99853 |
| 1938.109          | 96.36124 | 94.96841 |
| 1938.592          | 96.35043 | 94.93821 |

| Wavenumber (cm-1) | After    | Before   |
|-------------------|----------|----------|
| 1939.074          | 96.33968 | 94.90792 |
| 1939.556          | 96.32899 | 94.87756 |
| 1940.038          | 96.31827 | 94.84721 |
| 1940.52           | 96.30755 | 94.81688 |
| 1941.002          | 96.29657 | 94.78675 |
| 1941.484          | 96.28511 | 94.757   |
| 1941.966          | 96.27314 | 94.72765 |
| 1942.448          | 96.26067 | 94.69871 |
| 1942.931          | 96.24725 | 94.67051 |
| 1943.413          | 96.23267 | 94.64324 |
| 1943.895          | 96.21627 | 94.61737 |
| 1944.377          | 96.19696 | 94.59375 |
| 1944.859          | 96.17586 | 94.57156 |
| 1945.341          | 96.15359 | 94.55032 |
| 1945.823          | 96.13041 | 94.52989 |
| 1946.305          | 96.10677 | 94.50993 |
| 1946.788          | 96.08263 | 94.49047 |
| 1947.27           | 96.05804 | 94.47146 |
| 1947.752          | 96.03323 | 94.45269 |
| 1948.234          | 96.00841 | 94.43392 |
| 1948.716          | 95.9836  | 94.41525 |
| 1949.198          | 95.95892 | 94.39672 |
| 1949.68           | 95.93443 | 94.37832 |
| 1950.162          | 95.91003 | 94.36005 |
| 1950.645          | 95.88614 | 94.34182 |
| 1951.127          | 95.86291 | 94.32356 |
| 1951.609          | 95.84083 | 94.30516 |
| 1952.091          | 95.82065 | 94.28655 |
| 1952.573          | 95.80167 | 94.26775 |
| 1953.055          | 95.78345 | 94.24876 |
| 1953.537          | 95.76588 | 94.22957 |
| 1954.019          | 95.7487  | 94.21009 |
| 1954.501          | 95.73193 | 94.19038 |
| 1954.984          | 95.71555 | 94.17042 |
| 1955.466          | 95.69939 | 94.15034 |
| 1955.948          | 95.68323 | 94.13035 |
| 1956.43           | 95.66718 | 94.11009 |
| 1956.912          | 95.65134 | 94.0893  |
| 1957.394          | 95.63567 | 94.06794 |
| 1957.876          | 95.62022 | 94.04604 |
| 1958.358          | 95.60495 | 94.02322 |
| 1958.84           | 95.58979 | 93.99931 |
| 1959.323          | 95.57472 | 93.9737  |
| 1959.805          | 95.55972 | 93.94536 |
| 1960.287          | 95.54477 | 93.91537 |
| 1960.769          | 95.52986 | 93.88441 |
| 1961.251          | 95.51499 | 93.85275 |
| 1961.733          | 95.50013 | 93.82091 |
| 1962.215          | 95.48528 | 93.78883 |
| 1962.697          | 95.47043 | 93.75655 |
| 1963.18           | 95.45558 | 93.72421 |
| 1963.662          | 95.4408  | 93.69185 |
| 1964.144          | 95.42597 | 93.65982 |
| 1964.626          | 95.41105 | 93.62841 |
| 1965.108          | 95.39598 | 93.59769 |



| Wavenumber (cm-1) | After    | Before   |
|-------------------|----------|----------|
| 1965.59           | 95.38078 | 93.56758 |
| 1966.072          | 95.36536 | 93.53877 |
| 1966.554          | 95.34965 | 93.51159 |
| 1967.036          | 95.33349 | 93.48701 |
| 1967.519          | 95.31664 | 93.46659 |
| 1968.001          | 95.29932 | 93.44878 |
| 1968.483          | 95.28172 | 93.43259 |
| 1968.965          | 95.26385 | 93.4177  |
| 1969.447          | 95.24585 | 93.40344 |
| 1969.929          | 95.22771 | 93.38987 |
| 1970.411          | 95.20943 | 93.37692 |
| 1970.893          | 95.19109 | 93.36427 |
| 1971.375          | 95.17276 | 93.3516  |
| 1971.858          | 95.15442 | 93.33888 |
| 1972.34           | 95.13603 | 93.32597 |
| 1972.822          | 95.11761 | 93.31281 |
| 1973.304          | 95.09915 | 93.29949 |
| 1973.786          | 95.08067 | 93.2855  |
| 1974.268          | 95.0622  | 93.27056 |
| 1974.75           | 95.04374 | 93.25404 |
| 1975.232          | 95.02528 | 93.23488 |
| 1975.715          | 95.00687 | 93.21405 |
| 1976.197          | 94.98851 | 93.19215 |
| 1976.679          | 94.97025 | 93.16933 |
| 1977.161          | 94.9521  | 93.14595 |
| 1977.643          | 94.93405 | 93.12201 |
| 1978.125          | 94.91611 | 93.09753 |
| 1978.607          | 94.89824 | 93.07274 |
| 1979.089          | 94.88036 | 93.048   |
| 1979.572          | 94.86259 | 93.02306 |
| 1980.054          | 94.84509 | 92.99785 |
| 1980.536          | 94.82783 | 92.97234 |
| 1981.018          | 94.81082 | 92.94651 |
| 1981.5            | 94.79425 | 92.9204  |
| 1981.982          | 94.77818 | 92.89407 |
| 1982.464          | 94.76289 | 92.86749 |
| 1982.946          | 94.74886 | 92.84063 |
| 1983.428          | 94.73558 | 92.81358 |
| 1983.911          | 94.72275 | 92.78642 |
| 1984.393          | 94.71024 | 92.75919 |
| 1984.875          | 94.69784 | 92.732   |
| 1985.357          | 94.68555 | 92.70483 |
| 1985.839          | 94.67336 | 92.6777  |
| 1986.321          | 94.66119 | 92.65058 |
| 1986.803          | 94.64899 | 92.62341 |
| 1987.285          | 94.63666 | 92.59638 |
| 1987.767          | 94.62406 | 92.56964 |
| 1988.25           | 94.61118 | 92.54322 |
| 1988.732          | 94.59802 | 92.51714 |
| 1989.214          | 94.58432 | 92.49161 |
| 1989.696          | 94.56994 | 92.46678 |
| 1990.178          | 94.55545 | 92.443   |
| 1990.66           | 94.53738 | 92.42088 |
| 1991.142          | 94.51917 | 92.39982 |
| 1991.624          | 94.50025 | 92.37945 |

| Wavenumber (cm-1) | After    | Before   |
|-------------------|----------|----------|
| 1992.107          | 94.48076 | 92.35963 |
| 1992.589          | 94.46094 | 92.3401  |
| 1993.071          | 94.44078 | 92.3209  |
| 1993.553          | 94.4203  | 92.30197 |
| 1994.035          | 94.39963 | 92.28321 |
| 1994.517          | 94.37892 | 92.26448 |
| 1994.999          | 94.35815 | 92.24577 |
| 1995.481          | 94.33734 | 92.22703 |
| 1995.964          | 94.3165  | 92.20825 |
| 1996.446          | 94.29559 | 92.18943 |
| 1996.928          | 94.27477 | 92.17041 |
| 1997.41           | 94.25414 | 92.15108 |
| 1997.892          | 94.23385 | 92.1312  |
| 1998.374          | 94.21419 | 92.11038 |
| 1998.856          | 94.19493 | 92.08897 |
| 1999.338          | 94.17591 | 92.06721 |
| 1999.82           | 94.15709 | 92.0451  |
| 2000.302          | 94.13838 | 92.02281 |
| 2000.785          | 94.1198  | 92.00029 |
| 2001.267          | 94.10134 | 91.97758 |
| 2001.749          | 94.08295 | 91.95475 |
| 2002.231          | 94.06454 | 91.93192 |
| 2002.713          | 94.04617 | 91.909   |
| 2003.195          | 94.02789 | 91.88596 |
| 2003.677          | 94.00972 | 91.8628  |
| 2004.159          | 93.99167 | 91.8395  |
| 2004.642          | 93.97373 | 91.81607 |
| 2005.124          | 93.9559  | 91.79255 |
| 2005.606          | 93.93821 | 91.76894 |
| 2006.088          | 93.92071 | 91.74524 |
| 2006.57           | 93.90334 | 91.72145 |
| 2007.052          | 93.88606 | 91.69759 |
| 2007.534          | 93.86888 | 91.67365 |
| 2008.016          | 93.85178 | 91.64964 |
| 2008.499          | 93.83476 | 91.62556 |
| 2008.981          | 93.8178  | 91.60141 |
| 2009.463          | 93.8009  | 91.5772  |
| 2009.945          | 93.78398 | 91.55287 |
| 2010.427          | 93.76709 | 91.52849 |
| 2010.909          | 93.75026 | 91.50408 |
| 2011.391          | 93.73347 | 91.47965 |
| 2011.873          | 93.71674 | 91.4552  |
| 2012.355          | 93.70005 | 91.43076 |
| 2012.838          | 93.68346 | 91.40637 |
| 2013.32           | 93.66698 | 91.38208 |
| 2013.802          | 93.65073 | 91.35802 |
| 2014.284          | 93.63458 | 91.33405 |
| 2014.766          | 93.61846 | 91.31014 |
| 2015.248          | 93.60233 | 91.28622 |
| 2015.73           | 93.58611 | 91.26225 |
| 2016.212          | 93.56983 | 91.23824 |
| 2016.694          | 93.55349 | 91.2142  |
| 2017.177          | 93.53709 | 91.19008 |
| 2017.659          | 93.52068 | 91.1659  |
| 2018.141          | 93.50413 | 91.14163 |

| Wavenumber (cm-1) | After    | Before   |
|-------------------|----------|----------|
| 2018.623          | 93.48736 | 91.11723 |
| 2019.105          | 93.47034 | 91.09271 |
| 2019.587          | 93.4531  | 91.06806 |
| 2020.069          | 93.43548 | 91.04322 |
| 2020.551          | 93.41737 | 91.01816 |
| 2021.034          | 93.39857 | 90.99278 |
| 2021.516          | 93.37862 | 90.9669  |
| 2021.998          | 93.35796 | 90.94072 |
| 2022.48           | 93.33686 | 90.91432 |
| 2022.962          | 93.31544 | 90.88773 |
| 2023.444          | 93.29388 | 90.86103 |
| 2023.926          | 93.27216 | 90.83421 |
| 2024.408          | 93.2503  | 90.80727 |
| 2024.891          | 93.22839 | 90.78027 |
| 2025.373          | 93.20648 | 90.75324 |
| 2025.855          | 93.18463 | 90.72617 |
| 2026.337          | 93.16293 | 90.69908 |
| 2026.819          | 93.14137 | 90.67196 |
| 2027.301          | 93.11997 | 90.64481 |
| 2027.783          | 93.09892 | 90.61766 |
| 2028.265          | 93.0783  | 90.59054 |
| 2028.747          | 93.05839 | 90.56349 |
| 2029.229          | 93.03962 | 90.53657 |
| 2029.712          | 93.02156 | 90.50974 |
| 2030.194          | 93.00398 | 90.48297 |
| 2030.676          | 92.98681 | 90.45626 |
| 2031.158          | 92.96985 | 90.42959 |
| 2031.64           | 92.95314 | 90.40298 |
| 2032.122          | 92.93667 | 90.37642 |
| 2032.604          | 92.92033 | 90.3499  |
| 2033.086          | 92.90403 | 90.32343 |
| 2033.569          | 92.88781 | 90.29704 |
| 2034.051          | 92.87166 | 90.2707  |
| 2034.533          | 92.85556 | 90.24442 |
| 2035.015          | 92.83955 | 90.21822 |
| 2035.497          | 92.82354 | 90.19209 |
| 2035.979          | 92.80747 | 90.16603 |
| 2036.461          | 92.79126 | 90.14004 |
| 2036.943          | 92.77474 | 90.11409 |
| 2037.426          | 92.75805 | 90.08821 |
| 2037.908          | 92.74127 | 90.06242 |
| 2038.39           | 92.72444 | 90.03675 |
| 2038.872          | 92.70759 | 90.01119 |
| 2039.354          | 92.69073 | 89.98576 |
| 2039.836          | 92.67384 | 89.96047 |
| 2040.318          | 92.657   | 89.93536 |
| 2040.8            | 92.64024 | 89.91045 |
| 2041.282          | 92.6235  | 89.88574 |
| 2041.765          | 92.60677 | 89.86118 |
| 2042.247          | 92.59004 | 89.83678 |
| 2042.729          | 92.5733  | 89.81256 |
| 2043.211          | 92.55653 | 89.78848 |
| 2043.693          | 92.53973 | 89.76455 |
| 2044.175          | 92.52283 | 89.74069 |
| 2044.657          | 92.5058  | 89.71681 |

| Wavenumber (cm-1) | After    | Before   |
|-------------------|----------|----------|
| 2045.139          | 92.48869 | 89.69302 |
| 2045.622          | 92.47157 | 89.66944 |
| 2046.104          | 92.45446 | 89.6461  |
| 2046.586          | 92.43741 | 89.62308 |
| 2047.068          | 92.4204  | 89.60038 |
| 2047.55           | 92.40346 | 89.57801 |
| 2048.032          | 92.38659 | 89.55598 |
| 2048.514          | 92.36982 | 89.53426 |
| 2048.996          | 92.35315 | 89.51296 |
| 2049.479          | 92.33662 | 89.49216 |
| 2049.96           | 92.32022 | 89.47188 |
| 2050.443          | 92.30397 | 89.45211 |
| 2050.925          | 92.28789 | 89.43302 |
| 2051.407          | 92.27203 | 89.41467 |
| 2051.889          | 92.25642 | 89.39727 |
| 2052.371          | 92.24118 | 89.38121 |
| 2052.853          | 92.22621 | 89.36611 |
| 2053.335          | 92.21146 | 89.35175 |
| 2053.817          | 92.19695 | 89.33807 |
| 2054.3            | 92.18262 | 89.32491 |
| 2054.782          | 92.16848 | 89.31227 |
| 2055.264          | 92.15453 | 89.30014 |
| 2055.746          | 92.14073 | 89.28841 |
| 2056.228          | 92.12702 | 89.27699 |
| 2056.71           | 92.11346 | 89.26592 |
| 2057.192          | 92.10011 | 89.25518 |
| 2057.674          | 92.08694 | 89.24478 |
| 2058.156          | 92.07397 | 89.23472 |
| 2058.639          | 92.06123 | 89.22492 |
| 2059.121          | 92.04874 | 89.21536 |
| 2059.603          | 92.03658 | 89.20598 |
| 2060.085          | 92.02487 | 89.19668 |
| 2060.567          | 92.01347 | 89.18752 |
| 2061.049          | 92.00229 | 89.17852 |
| 2061.531          | 91.99129 | 89.16967 |
| 2062.013          | 91.98038 | 89.161   |
| 2062.496          | 91.96958 | 89.15249 |
| 2062.978          | 91.95888 | 89.14413 |
| 2063.46           | 91.94827 | 89.13593 |
| 2063.942          | 91.93776 | 89.1279  |
| 2064.424          | 91.92728 | 89.12001 |
| 2064.906          | 91.91676 | 89.11221 |
| 2065.388          | 91.90618 | 89.1045  |
| 2065.87           | 91.89557 | 89.09685 |
| 2066.353          | 91.88481 | 89.08925 |
| 2066.835          | 91.87384 | 89.08166 |
| 2067.317          | 91.86246 | 89.07403 |
| 2067.799          | 91.85043 | 89.06629 |
| 2068.281          | 91.83803 | 89.0585  |
| 2068.763          | 91.82541 | 89.05069 |
| 2069.245          | 91.81263 | 89.04287 |
| 2069.727          | 91.79981 | 89.03505 |
| 2070.209          | 91.78696 | 89.02721 |
| 2070.692          | 91.77406 | 89.01935 |
| 2071.174          | 91.76119 | 89.01151 |

| Wavenumber (cm-1) | After    | Before   |
|-------------------|----------|----------|
| 2071.656          | 91.74841 | 89.0037  |
| 2072.138          | 91.73571 | 88.99587 |
| 2072.62           | 91.72313 | 88.98802 |
| 2073.102          | 91.71066 | 88.98014 |
| 2073.584          | 91.69829 | 88.97222 |
| 2074.066          | 91.68612 | 88.96423 |
| 2074.549          | 91.67419 | 88.95615 |
| 2075.031          | 91.66261 | 88.948   |
| 2075.513          | 91.65155 | 88.93969 |
| 2075.995          | 91.64085 | 88.93128 |
| 2076.477          | 91.63042 | 88.9228  |
| 2076.959          | 91.62024 | 88.91424 |
| 2077.441          | 91.61024 | 88.90561 |
| 2077.923          | 91.60043 | 88.89694 |
| 2078.406          | 91.59081 | 88.88822 |
| 2078.887          | 91.5813  | 88.87946 |
| 2079.37           | 91.57187 | 88.87071 |
| 2079.852          | 91.56255 | 88.8619  |
| 2080.334          | 91.55339 | 88.85307 |
| 2080.816          | 91.54439 | 88.84417 |
| 2081.298          | 91.53555 | 88.83523 |
| 2081.78           | 91.52689 | 88.82622 |
| 2082.262          | 91.51839 | 88.81713 |
| 2082.744          | 91.51013 | 88.80795 |
| 2083.227          | 91.50216 | 88.79862 |
| 2083.709          | 91.49438 | 88.78919 |
| 2084.191          | 91.48676 | 88.7797  |
| 2084.673          | 91.47926 | 88.77019 |
| 2085.155          | 91.47185 | 88.76067 |
| 2085.637          | 91.46451 | 88.75116 |
| 2086.119          | 91.45723 | 88.74163 |
| 2086.601          | 91.44999 | 88.73211 |
| 2087.083          | 91.44277 | 88.72255 |
| 2087.566          | 91.43556 | 88.71302 |
| 2088.048          | 91.42834 | 88.70357 |
| 2088.53           | 91.42109 | 88.69418 |
| 2089.012          | 91.41383 | 88.68488 |
| 2089.494          | 91.40648 | 88.67572 |
| 2089.976          | 91.39906 | 88.66676 |
| 2090.458          | 91.39151 | 88.65809 |
| 2090.94           | 91.38376 | 88.64994 |
| 2091.423          | 91.37585 | 88.6421  |
| 2091.905          | 91.36784 | 88.63442 |
| 2092.387          | 91.35969 | 88.62687 |
| 2092.869          | 91.3514  | 88.61933 |
| 2093.351          | 91.34302 | 88.61182 |
| 2093.833          | 91.33452 | 88.60435 |
| 2094.315          | 91.32596 | 88.59686 |
| 2094.797          | 91.31741 | 88.5894  |
| 2095.28           | 91.30878 | 88.58186 |
| 2095.762          | 91.29996 | 88.5742  |
| 2096.244          | 91.29098 | 88.56638 |
| 2096.726          | 91.28181 | 88.55845 |
| 2097.208          | 91.27238 | 88.55026 |
| 2097.69           | 91.26261 | 88.54173 |

| Wavenumber (cm-1) | After    | Before   |
|-------------------|----------|----------|
| 2098.172          | 91.25233 | 88.53267 |
| 2098.654          | 91.24122 | 88.52274 |
| 2099.136          | 91.22963 | 88.51226 |
| 2099.619          | 91.21777 | 88.50148 |
| 2100.101          | 91.20572 | 88.49046 |
| 2100.583          | 91.19365 | 88.47935 |
| 2101.065          | 91.18156 | 88.46813 |
| 2101.547          | 91.16942 | 88.45683 |
| 2102.029          | 91.15728 | 88.44547 |
| 2102.511          | 91.14514 | 88.43411 |
| 2102.993          | 91.13312 | 88.42281 |
| 2103.476          | 91.12137 | 88.41162 |
| 2103.958          | 91.10989 | 88.40057 |
| 2104.44           | 91.09869 | 88.38964 |
| 2104.922          | 91.08801 | 88.37898 |
| 2105.404          | 91.07799 | 88.36868 |
| 2105.886          | 91.06901 | 88.35897 |
| 2106.368          | 91.0617  | 88.35022 |
| 2106.85           | 91.05543 | 88.34207 |
| 2107.333          | 91.04979 | 88.33429 |
| 2107.814          | 91.04465 | 88.32679 |
| 2108.297          | 91.0397  | 88.31942 |
| 2108.779          | 91.03499 | 88.3122  |
| 2109.261          | 91.03048 | 88.30512 |
| 2109.743          | 91.02605 | 88.29807 |
| 2110.225          | 91.02158 | 88.29101 |
| 2110.707          | 91.01704 | 88.28391 |
| 2111.189          | 91.01234 | 88.27675 |
| 2111.671          | 91.00745 | 88.26953 |
| 2112.154          | 91.0024  | 88.26226 |
| 2112.636          | 90.99691 | 88.25485 |
| 2113.118          | 90.99089 | 88.24722 |
| 2113.6            | 90.98399 | 88.23925 |
| 2114.082          | 90.97567 | 88.23071 |
| 2114.564          | 90.96645 | 88.22181 |
| 2115.046          | 90.95663 | 88.21267 |
| 2115.528          | 90.94632 | 88.20331 |
| 2116.01           | 90.9357  | 88.19379 |
| 2116.493          | 90.92477 | 88.18413 |
| 2116.975          | 90.91355 | 88.17433 |
| 2117.457          | 90.90215 | 88.16445 |
| 2117.939          | 90.89076 | 88.1546  |
| 2118.421          | 90.87929 | 88.14467 |
| 2118.903          | 90.86769 | 88.13462 |
| 2119.385          | 90.85597 | 88.12446 |
| 2119.867          | 90.8441  | 88.11416 |
| 2120.35           | 90.83215 | 88.10371 |
| 2120.832          | 90.82011 | 88.09309 |
| 2121.314          | 90.80804 | 88.08221 |
| 2121.796          | 90.79594 | 88.07093 |
| 2122.278          | 90.78385 | 88.0594  |
| 2122.76           | 90.77177 | 88.04775 |
| 2123.242          | 90.75972 | 88.03605 |
| 2123.724          | 90.74776 | 88.02437 |
| 2124.207          | 90.73585 | 88.01269 |

| Wavenumber (cm-1) | After    | Before   |
|-------------------|----------|----------|
| 2124.689          | 90.72403 | 88.00102 |
| 2125.171          | 90.71223 | 87.98936 |
| 2125.653          | 90.70041 | 87.97766 |
| 2126.135          | 90.6887  | 87.96607 |
| 2126.617          | 90.67721 | 87.9547  |
| 2127.099          | 90.66596 | 87.94355 |
| 2127.581          | 90.65495 | 87.93263 |
| 2128.063          | 90.64435 | 87.92211 |
| 2128.546          | 90.63424 | 87.91211 |
| 2129.028          | 90.62488 | 87.90293 |
| 2129.51           | 90.61671 | 87.89509 |
| 2129.992          | 90.60927 | 87.88803 |
| 2130.474          | 90.60229 | 87.88146 |
| 2130.956          | 90.59566 | 87.87525 |
| 2131.438          | 90.58916 | 87.86913 |
| 2131.92           | 90.58285 | 87.86318 |
| 2132.403          | 90.57668 | 87.85735 |
| 2132.885          | 90.5706  | 87.85159 |
| 2133.367          | 90.5646  | 87.84589 |
| 2133.849          | 90.55854 | 87.84007 |
| 2134.331          | 90.55232 | 87.83402 |
| 2134.813          | 90.54593 | 87.82771 |
| 2135.295          | 90.53938 | 87.82118 |
| 2135.777          | 90.53242 | 87.81409 |
| 2136.26           | 90.52494 | 87.80628 |
| 2136.741          | 90.51655 | 87.7973  |
| 2137.224          | 90.50665 | 87.78636 |
| 2137.706          | 90.49585 | 87.77427 |
| 2138.188          | 90.48453 | 87.7615  |
| 2138.67           | 90.4728  | 87.74821 |
| 2139.152          | 90.46094 | 87.73477 |
| 2139.634          | 90.44893 | 87.72114 |
| 2140.116          | 90.43678 | 87.70734 |
| 2140.598          | 90.42461 | 87.69354 |
| 2141.081          | 90.41254 | 87.6798  |
| 2141.563          | 90.40059 | 87.66625 |
| 2142.045          | 90.38883 | 87.653   |
| 2142.527          | 90.37731 | 87.64009 |
| 2143.009          | 90.36596 | 87.62748 |
| 2143.491          | 90.35503 | 87.61551 |
| 2143.973          | 90.34461 | 87.60436 |
| 2144.455          | 90.33501 | 87.59449 |
| 2144.938          | 90.32668 | 87.58667 |
| 2145.42           | 90.3192  | 87.58015 |
| 2145.902          | 90.31226 | 87.57447 |
| 2146.384          | 90.30582 | 87.5695  |
| 2146.866          | 90.29969 | 87.56493 |
| 2147.348          | 90.29388 | 87.56079 |
| 2147.83           | 90.28838 | 87.55705 |
| 2148.312          | 90.2831  | 87.55354 |
| 2148.794          | 90.27787 | 87.55006 |
| 2149.277          | 90.27277 | 87.54666 |
| 2149.759          | 90.26785 | 87.54336 |
| 2150.241          | 90.26308 | 87.54011 |
| 2150.723          | 90.25849 | 87.53695 |

| Wavenumber (cm-1) | After    | Before   |
|-------------------|----------|----------|
| 2151.205          | 90.25404 | 87.53374 |
| 2151.687          | 90.24967 | 87.53036 |
| 2152.169          | 90.24537 | 87.52665 |
| 2152.651          | 90.24107 | 87.52229 |
| 2153.134          | 90.23682 | 87.51756 |
| 2153.616          | 90.2326  | 87.5126  |
| 2154.098          | 90.22842 | 87.50743 |
| 2154.58           | 90.22426 | 87.50212 |
| 2155.062          | 90.22012 | 87.49668 |
| 2155.544          | 90.21598 | 87.4911  |
| 2156.026          | 90.21186 | 87.48546 |
| 2156.508          | 90.20778 | 87.47987 |
| 2156.99           | 90.2037  | 87.47423 |
| 2157.473          | 90.19955 | 87.46844 |
| 2157.955          | 90.19535 | 87.4625  |
| 2158.437          | 90.19106 | 87.45639 |
| 2158.919          | 90.18664 | 87.45004 |
| 2159.401          | 90.18207 | 87.44344 |
| 2159.883          | 90.17725 | 87.43645 |
| 2160.365          | 90.17207 | 87.42887 |
| 2160.847          | 90.16666 | 87.42093 |
| 2161.33           | 90.16106 | 87.41276 |
| 2161.812          | 90.1553  | 87.40442 |
| 2162.294          | 90.14941 | 87.39603 |
| 2162.776          | 90.14342 | 87.38756 |
| 2163.258          | 90.13731 | 87.37903 |
| 2163.74           | 90.13112 | 87.37045 |
| 2164.222          | 90.12489 | 87.36182 |
| 2164.704          | 90.11858 | 87.35324 |
| 2165.187          | 90.11218 | 87.34479 |
| 2165.668          | 90.1057  | 87.33648 |
| 2166.151          | 90.09911 | 87.3283  |
| 2166.633          | 90.09244 | 87.32041 |
| 2167.115          | 90.08567 | 87.3129  |
| 2167.597          | 90.0788  | 87.30602 |
| 2168.079          | 90.07181 | 87.30017 |
| 2168.561          | 90.06473 | 87.29495 |
| 2169.043          | 90.05757 | 87.29009 |
| 2169.525          | 90.05034 | 87.28552 |
| 2170.008          | 90.04306 | 87.28103 |
| 2170.49           | 90.03574 | 87.27665 |
| 2170.972          | 90.02837 | 87.27238 |
| 2171.454          | 90.02093 | 87.2681  |
| 2171.936          | 90.01342 | 87.26375 |
| 2172.418          | 90.00586 | 87.25929 |
| 2172.9            | 89.9983  | 87.2547  |
| 2173.382          | 89.99076 | 87.24996 |
| 2173.865          | 89.98322 | 87.24507 |
| 2174.347          | 89.97573 | 87.23991 |
| 2174.829          | 89.96832 | 87.23438 |
| 2175.311          | 89.96111 | 87.2283  |
| 2175.793          | 89.95421 | 87.22138 |
| 2176.275          | 89.9475  | 87.21388 |
| 2176.757          | 89.94086 | 87.20597 |
| 2177.239          | 89.93423 | 87.1977  |



| Wavenumber (cm-1) | After    | Before   |
|-------------------|----------|----------|
| 2177.721          | 89.92757 | 87.18918 |
| 2178.204          | 89.92086 | 87.1804  |
| 2178.686          | 89.91411 | 87.17137 |
| 2179.168          | 89.9073  | 87.16216 |
| 2179.65           | 89.90044 | 87.15289 |
| 2180.132          | 89.89344 | 87.14347 |
| 2180.614          | 89.88629 | 87.13386 |
| 2181.096          | 89.87896 | 87.12406 |
| 2181.578          | 89.87146 | 87.11406 |
| 2182.061          | 89.86369 | 87.10386 |
| 2182.543          | 89.85559 | 87.09345 |
| 2183.025          | 89.84701 | 87.0828  |
| 2183.507          | 89.83766 | 87.07182 |
| 2183.989          | 89.82783 | 87.06062 |
| 2184.471          | 89.81768 | 87.04928 |
| 2184.953          | 89.80727 | 87.0378  |
| 2185.435          | 89.79671 | 87.02626 |
| 2185.917          | 89.78601 | 87.01464 |
| 2186.4            | 89.77515 | 87.00296 |
| 2186.882          | 89.76421 | 86.99122 |
| 2187.364          | 89.7532  | 86.97939 |
| 2187.846          | 89.74216 | 86.96754 |
| 2188.328          | 89.73114 | 86.95576 |
| 2188.81           | 89.72015 | 86.94408 |
| 2189.292          | 89.70918 | 86.93246 |
| 2189.774          | 89.69833 | 86.92105 |
| 2190.257          | 89.68768 | 86.90991 |
| 2190.739          | 89.67736 | 86.8992  |
| 2191.221          | 89.66765 | 86.88927 |
| 2191.703          | 89.65829 | 86.87978 |
| 2192.185          | 89.64912 | 86.87056 |
| 2192.667          | 89.64011 | 86.86152 |
| 2193.149          | 89.63113 | 86.85253 |
| 2193.631          | 89.62222 | 86.8436  |
| 2194.114          | 89.61337 | 86.83474 |
| 2194.595          | 89.60453 | 86.82588 |
| 2195.078          | 89.59568 | 86.81699 |
| 2195.56           | 89.58678 | 86.80805 |
| 2196.042          | 89.5778  | 86.79897 |
| 2196.524          | 89.56874 | 86.78975 |
| 2197.006          | 89.55962 | 86.7804  |
| 2197.488          | 89.55035 | 86.77076 |
| 2197.97           | 89.54085 | 86.76076 |
| 2198.452          | 89.53102 | 86.75017 |
| 2198.935          | 89.5206  | 86.73862 |
| 2199.417          | 89.50983 | 86.72649 |
| 2199.899          | 89.49885 | 86.714   |
| 2200.381          | 89.48772 | 86.70124 |
| 2200.863          | 89.47655 | 86.68836 |
| 2201.345          | 89.46531 | 86.67537 |
| 2201.827          | 89.45403 | 86.66226 |
| 2202.309          | 89.44273 | 86.64909 |
| 2202.792          | 89.43145 | 86.63591 |
| 2203.274          | 89.42023 | 86.62278 |
| 2203.756          | 89.40909 | 86.60975 |

| Wavenumber (cm-1) | After    | Before   |
|-------------------|----------|----------|
| 2204.238          | 89.39806 | 86.59684 |
| 2204.72           | 89.38712 | 86.58402 |
| 2205.202          | 89.37638 | 86.57146 |
| 2205.684          | 89.36591 | 86.55924 |
| 2206.166          | 89.35585 | 86.54759 |
| 2206.648          | 89.34647 | 86.53685 |
| 2207.131          | 89.3375  | 86.52669 |
| 2207.613          | 89.3288  | 86.51688 |
| 2208.095          | 89.3203  | 86.50734 |
| 2208.577          | 89.3119  | 86.49791 |
| 2209.059          | 89.3036  | 86.48863 |
| 2209.541          | 89.29541 | 86.47945 |
| 2210.023          | 89.28728 | 86.47036 |
| 2210.505          | 89.27915 | 86.4613  |
| 2210.988          | 89.27101 | 86.45223 |
| 2211.47           | 89.26284 | 86.44309 |
| 2211.952          | 89.25462 | 86.43386 |
| 2212.434          | 89.24637 | 86.42458 |
| 2212.916          | 89.238   | 86.41509 |
| 2213.398          | 89.22946 | 86.40528 |
| 2213.88           | 89.22065 | 86.39497 |
| 2214.362          | 89.21134 | 86.38378 |
| 2214.844          | 89.20175 | 86.37206 |
| 2215.327          | 89.19198 | 86.36006 |
| 2215.809          | 89.18206 | 86.34786 |
| 2216.291          | 89.17207 | 86.33564 |
| 2216.773          | 89.16201 | 86.32337 |
| 2217.255          | 89.15189 | 86.31104 |
| 2217.737          | 89.14173 | 86.29872 |
| 2218.219          | 89.13159 | 86.28643 |
| 2218.701          | 89.12144 | 86.27427 |
| 2219.184          | 89.11132 | 86.26229 |
| 2219.666          | 89.1012  | 86.25052 |
| 2220.148          | 89.0911  | 86.23894 |
| 2220.63           | 89.08104 | 86.22773 |
| 2221.112          | 89.07105 | 86.217   |
| 2221.594          | 89.06121 | 86.20705 |
| 2222.076          | 89.05159 | 86.19833 |
| 2222.558          | 89.04211 | 86.19036 |
| 2223.041          | 89.03271 | 86.18285 |
| 2223.522          | 89.02338 | 86.17571 |
| 2224.005          | 89.01408 | 86.16872 |
| 2224.487          | 89.00484 | 86.16192 |
| 2224.969          | 88.99564 | 86.15527 |
| 2225.451          | 88.98646 | 86.14864 |
| 2225.933          | 88.97728 | 86.14197 |
| 2226.415          | 88.96809 | 86.13522 |
| 2226.897          | 88.95892 | 86.12837 |
| 2227.379          | 88.94975 | 86.12139 |
| 2227.862          | 88.94061 | 86.1143  |
| 2228.344          | 88.93147 | 86.10696 |
| 2228.826          | 88.92232 | 86.09927 |
| 2229.308          | 88.91315 | 86.09106 |
| 2229.79           | 88.90395 | 86.08202 |
| 2230.272          | 88.89474 | 86.07243 |

| Wavenumber (cm-1) | After    | Before   |
|-------------------|----------|----------|
| 2230.754          | 88.88551 | 86.06245 |
| 2231.236          | 88.87629 | 86.05209 |
| 2231.719          | 88.86705 | 86.04146 |
| 2232.201          | 88.85782 | 86.03057 |
| 2232.683          | 88.84858 | 86.01941 |
| 2233.165          | 88.83936 | 86.00805 |
| 2233.647          | 88.83015 | 85.99661 |
| 2234.129          | 88.82094 | 85.98502 |
| 2234.611          | 88.81172 | 85.97317 |
| 2235.093          | 88.80249 | 85.96108 |
| 2235.575          | 88.79325 | 85.94874 |
| 2236.058          | 88.78399 | 85.9361  |
| 2236.54           | 88.77469 | 85.92317 |
| 2237.022          | 88.76534 | 85.90982 |
| 2237.504          | 88.7559  | 85.89593 |
| 2237.986          | 88.74641 | 85.88168 |
| 2238.468          | 88.73692 | 85.86715 |
| 2238.95           | 88.72739 | 85.85242 |
| 2239.432          | 88.7179  | 85.83756 |
| 2239.915          | 88.7084  | 85.82255 |
| 2240.397          | 88.69891 | 85.80744 |
| 2240.879          | 88.68945 | 85.79226 |
| 2241.361          | 88.67999 | 85.77702 |
| 2241.843          | 88.67056 | 85.76177 |
| 2242.325          | 88.66118 | 85.74654 |
| 2242.807          | 88.65186 | 85.73136 |
| 2243.289          | 88.64259 | 85.71623 |
| 2243.771          | 88.63342 | 85.70126 |
| 2244.254          | 88.62436 | 85.68646 |
| 2244.736          | 88.61548 | 85.67199 |
| 2245.218          | 88.60687 | 85.65803 |
| 2245.7            | 88.59845 | 85.64441 |
| 2246.182          | 88.59013 | 85.63103 |
| 2246.664          | 88.58189 | 85.61784 |
| 2247.146          | 88.5737  | 85.60481 |
| 2247.628          | 88.56554 | 85.59191 |
| 2248.111          | 88.55742 | 85.57917 |
| 2248.593          | 88.54929 | 85.56654 |
| 2249.075          | 88.5411  | 85.55394 |
| 2249.557          | 88.53291 | 85.54144 |
| 2250.039          | 88.52469 | 85.52905 |
| 2250.521          | 88.51646 | 85.51678 |
| 2251.003          | 88.50819 | 85.50463 |
| 2251.485          | 88.49989 | 85.49262 |
| 2251.968          | 88.49155 | 85.48075 |
| 2252.449          | 88.48317 | 85.46903 |
| 2252.932          | 88.47475 | 85.45747 |
| 2253.414          | 88.46628 | 85.44607 |
| 2253.896          | 88.45772 | 85.43478 |
| 2254.378          | 88.44907 | 85.42359 |
| 2254.86           | 88.44029 | 85.41251 |
| 2255.342          | 88.4314  | 85.40151 |
| 2255.824          | 88.4224  | 85.39059 |
| 2256.306          | 88.4133  | 85.37972 |
| 2256.789          | 88.40414 | 85.36887 |

| Wavenumber (cm-1) | After    | Before   |
|-------------------|----------|----------|
| 2257.271          | 88.39484 | 85.35806 |
| 2257.753          | 88.38535 | 85.34731 |
| 2258.235          | 88.37563 | 85.33663 |
| 2258.717          | 88.36572 | 85.326   |
| 2259.199          | 88.35551 | 85.31545 |
| 2259.681          | 88.34497 | 85.30497 |
| 2260.163          | 88.33394 | 85.29463 |
| 2260.646          | 88.32217 | 85.28453 |
| 2261.128          | 88.30992 | 85.27453 |
| 2261.61           | 88.29736 | 85.26457 |
| 2262.092          | 88.28454 | 85.25461 |
| 2262.574          | 88.27157 | 85.24458 |
| 2263.056          | 88.25845 | 85.23448 |
| 2263.538          | 88.24518 | 85.22432 |
| 2264.02           | 88.2318  | 85.21411 |
| 2264.502          | 88.21837 | 85.2039  |
| 2264.985          | 88.20491 | 85.19355 |
| 2265.467          | 88.19147 | 85.18299 |
| 2265.949          | 88.17805 | 85.17218 |
| 2266.431          | 88.16467 | 85.16115 |
| 2266.913          | 88.15141 | 85.14974 |
| 2267.395          | 88.13836 | 85.13786 |
| 2267.877          | 88.12566 | 85.12526 |
| 2268.359          | 88.11358 | 85.11154 |
| 2268.842          | 88.10184 | 85.09712 |
| 2269.324          | 88.09032 | 85.08225 |
| 2269.806          | 88.07898 | 85.06704 |
| 2270.288          | 88.0677  | 85.05171 |
| 2270.77           | 88.0565  | 85.0362  |
| 2271.252          | 88.04538 | 85.02056 |
| 2271.734          | 88.03431 | 85.00484 |
| 2272.216          | 88.02325 | 84.98908 |
| 2272.698          | 88.01216 | 84.97337 |
| 2273.181          | 88.00105 | 84.95782 |
| 2273.663          | 87.9899  | 84.94241 |
| 2274.145          | 87.97872 | 84.92716 |
| 2274.627          | 87.96744 | 84.91225 |
| 2275.109          | 87.95599 | 84.89782 |
| 2275.591          | 87.94428 | 84.88416 |
| 2276.073          | 87.93208 | 84.87179 |
| 2276.555          | 87.91959 | 84.86021 |
| 2277.038          | 87.90697 | 84.8491  |
| 2277.52           | 87.89426 | 84.83837 |
| 2278.002          | 87.88154 | 84.82781 |
| 2278.484          | 87.86881 | 84.81742 |
| 2278.966          | 87.85608 | 84.80722 |
| 2279.448          | 87.84339 | 84.79711 |
| 2279.93           | 87.83075 | 84.78703 |
| 2280.412          | 87.81821 | 84.77692 |
| 2280.895          | 87.80579 | 84.76672 |
| 2281.376          | 87.79351 | 84.75641 |
| 2281.859          | 87.78137 | 84.74603 |
| 2282.341          | 87.76946 | 84.73536 |
| 2282.823          | 87.75784 | 84.72431 |
| 2283.305          | 87.74667 | 84.71261 |

| Wavenumber (cm-1) | After    | Before   |
|-------------------|----------|----------|
| 2283.787          | 87.73617 | 84.69977 |
| 2284.269          | 87.7261  | 84.68627 |
| 2284.751          | 87.71634 | 84.67239 |
| 2285.233          | 87.70681 | 84.65823 |
| 2285.716          | 87.69743 | 84.64399 |
| 2286.198          | 87.68819 | 84.62965 |
| 2286.68           | 87.6791  | 84.61522 |
| 2287.162          | 87.67012 | 84.60079 |
| 2287.644          | 87.66119 | 84.58642 |
| 2288.126          | 87.65231 | 84.57217 |
| 2288.608          | 87.64344 | 84.55808 |
| 2289.09           | 87.63459 | 84.54419 |
| 2289.573          | 87.62575 | 84.53046 |
| 2290.055          | 87.61685 | 84.51708 |
| 2290.537          | 87.60784 | 84.50414 |
| 2291.019          | 87.5986  | 84.49188 |
| 2291.501          | 87.58893 | 84.48075 |
| 2291.983          | 87.579   | 84.47031 |
| 2292.465          | 87.56896 | 84.46033 |
| 2292.947          | 87.55884 | 84.45072 |
| 2293.429          | 87.54874 | 84.44133 |
| 2293.912          | 87.53863 | 84.43215 |
| 2294.394          | 87.52851 | 84.42318 |
| 2294.876          | 87.51838 | 84.41432 |
| 2295.358          | 87.50822 | 84.40547 |
| 2295.84           | 87.49809 | 84.39665 |
| 2296.322          | 87.4881  | 84.38785 |
| 2296.804          | 87.47823 | 84.37906 |
| 2297.286          | 87.46847 | 84.37031 |
| 2297.769          | 87.45896 | 84.3615  |
| 2298.251          | 87.44979 | 84.35259 |
| 2298.733          | 87.44119 | 84.34347 |
| 2299.215          | 87.43357 | 84.33397 |
| 2299.697          | 87.42648 | 84.32425 |
| 2300.179          | 87.41967 | 84.31438 |
| 2300.661          | 87.41303 | 84.30435 |
| 2301.143          | 87.40633 | 84.29422 |
| 2301.625          | 87.3996  | 84.28397 |
| 2302.108          | 87.39282 | 84.27364 |
| 2302.59           | 87.38596 | 84.26325 |
| 2303.072          | 87.37901 | 84.25291 |
| 2303.554          | 87.3718  | 84.24251 |
| 2304.036          | 87.36418 | 84.23197 |
| 2304.518          | 87.35616 | 84.2213  |
| 2305              | 87.34773 | 84.21049 |
| 2305.482          | 87.33862 | 84.19945 |
| 2305.965          | 87.32868 | 84.18815 |
| 2306.447          | 87.31747 | 84.17644 |
| 2306.929          | 87.30427 | 84.16407 |
| 2307.411          | 87.28981 | 84.15134 |
| 2307.893          | 87.27452 | 84.13838 |
| 2308.375          | 87.25856 | 84.12529 |
| 2308.857          | 87.24225 | 84.11222 |
| 2309.339          | 87.22552 | 84.09912 |
| 2309.822          | 87.20844 | 84.08601 |

| Wavenumber (cm-1) | After    | Before   |
|-------------------|----------|----------|
| 2310.303          | 87.19109 | 84.07282 |
| 2310.786          | 87.1736  | 84.05949 |
| 2311.268          | 87.15604 | 84.04624 |
| 2311.75           | 87.13852 | 84.03327 |
| 2312.232          | 87.12106 | 84.02059 |
| 2312.714          | 87.10361 | 84.00815 |
| 2313.196          | 87.08648 | 83.99629 |
| 2313.678          | 87.06982 | 83.98518 |
| 2314.16           | 87.05401 | 83.97534 |
| 2314.643          | 87.03973 | 83.96764 |
| 2315.125          | 87.02631 | 83.96114 |
| 2315.607          | 87.0134  | 83.95529 |
| 2316.089          | 87.00084 | 83.94985 |
| 2316.571          | 86.98837 | 83.9444  |
| 2317.053          | 86.97604 | 83.93896 |
| 2317.535          | 86.96378 | 83.93347 |
| 2318.017          | 86.95145 | 83.92775 |
| 2318.5            | 86.93886 | 83.92168 |
| 2318.982          | 86.92607 | 83.9151  |
| 2319.464          | 86.91312 | 83.90785 |
| 2319.946          | 86.89996 | 83.8999  |
| 2320.428          | 86.88663 | 83.89124 |
| 2320.91           | 86.87303 | 83.88149 |
| 2321.392          | 86.85909 | 83.87041 |
| 2321.874          | 86.84468 | 83.85745 |
| 2322.356          | 86.82967 | 83.84171 |
| 2322.839          | 86.81418 | 83.82407 |
| 2323.321          | 86.79823 | 83.80497 |
| 2323.803          | 86.78184 | 83.78457 |
| 2324.285          | 86.76496 | 83.76315 |
| 2324.767          | 86.74765 | 83.74072 |
| 2325.249          | 86.7299  | 83.71731 |
| 2325.731          | 86.71179 | 83.69317 |
| 2326.213          | 86.69352 | 83.66865 |
| 2326.696          | 86.67483 | 83.64349 |
| 2327.178          | 86.65553 | 83.61751 |
| 2327.66           | 86.6356  | 83.59072 |
| 2328.142          | 86.61507 | 83.5631  |
| 2328.624          | 86.59366 | 83.53457 |
| 2329.106          | 86.57127 | 83.50514 |
| 2329.588          | 86.54749 | 83.47461 |
| 2330.07           | 86.52164 | 83.44262 |
| 2330.552          | 86.49443 | 83.40961 |
| 2331.035          | 86.46635 | 83.37588 |
| 2331.517          | 86.43758 | 83.34155 |
| 2331.999          | 86.40845 | 83.30687 |
| 2332.481          | 86.37894 | 83.27184 |
| 2332.963          | 86.34913 | 83.23652 |
| 2333.445          | 86.31918 | 83.20099 |
| 2333.927          | 86.28925 | 83.16532 |
| 2334.409          | 86.2594  | 83.12965 |
| 2334.892          | 86.22972 | 83.09413 |
| 2335.374          | 86.20026 | 83.05883 |
| 2335.856          | 86.17102 | 83.02377 |
| 2336.338          | 86.14225 | 82.98918 |

| Wavenumber (cm-1) | After    | Before   |
|-------------------|----------|----------|
| 2336.82           | 86.11412 | 82.95526 |
| 2337.302          | 86.08694 | 82.92238 |
| 2337.784          | 86.06126 | 82.89115 |
| 2338.266          | 86.03662 | 82.86104 |
| 2338.749          | 86.01279 | 82.83173 |
| 2339.23           | 85.98968 | 82.80315 |
| 2339.713          | 85.96719 | 82.77512 |
| 2340.195          | 85.94533 | 82.74767 |
| 2340.677          | 85.92409 | 82.72081 |
| 2341.159          | 85.90334 | 82.69442 |
| 2341.641          | 85.88288 | 82.66837 |
| 2342.123          | 85.86292 | 82.64276 |
| 2342.605          | 85.84361 | 82.61765 |
| 2343.087          | 85.82498 | 82.59303 |
| 2343.57           | 85.80705 | 82.56898 |
| 2344.052          | 85.78992 | 82.54541 |
| 2344.534          | 85.77363 | 82.52234 |
| 2345.016          | 85.75835 | 82.4997  |
| 2345.498          | 85.74446 | 82.47743 |
| 2345.98           | 85.73158 | 82.45562 |
| 2346.462          | 85.71951 | 82.43432 |
| 2346.944          | 85.70816 | 82.41355 |
| 2347.427          | 85.6974  | 82.39341 |
| 2347.909          | 85.68721 | 82.37383 |
| 2348.391          | 85.67757 | 82.35482 |
| 2348.873          | 85.66839 | 82.33637 |
| 2349.355          | 85.65958 | 82.31835 |
| 2349.837          | 85.65112 | 82.30094 |
| 2350.319          | 85.64303 | 82.28425 |
| 2350.801          | 85.63527 | 82.2683  |
| 2351.283          | 85.62784 | 82.25305 |
| 2351.766          | 85.62066 | 82.23871 |
| 2352.248          | 85.61366 | 82.22535 |
| 2352.73           | 85.60676 | 82.21331 |
| 2353.212          | 85.5998  | 82.20312 |
| 2353.694          | 85.5929  | 82.19417 |
| 2354.176          | 85.58608 | 82.18614 |
| 2354.658          | 85.57938 | 82.17887 |
| 2355.14           | 85.57278 | 82.17209 |
| 2355.623          | 85.5663  | 82.16581 |
| 2356.105          | 85.55991 | 82.16    |
| 2356.587          | 85.5536  | 82.15459 |
| 2357.069          | 85.54739 | 82.14947 |
| 2357.551          | 85.54126 | 82.14453 |
| 2358.033          | 85.53517 | 82.13966 |
| 2358.515          | 85.52911 | 82.13477 |
| 2358.997          | 85.52306 | 82.12993 |
| 2359.479          | 85.517   | 82.12481 |
| 2359.962          | 85.51093 | 82.11926 |
| 2360.444          | 85.50481 | 82.11287 |
| 2360.926          | 85.4987  | 82.10496 |
| 2361.408          | 85.49252 | 82.09615 |
| 2361.89           | 85.48627 | 82.08686 |
| 2362.372          | 85.47991 | 82.0772  |
| 2362.854          | 85.47341 | 82.06747 |

| Wavenumber (cm-1) | After    | Before   |
|-------------------|----------|----------|
| 2363.336          | 85.46678 | 82.05758 |
| 2363.819          | 85.45999 | 82.04754 |
| 2364.301          | 85.45302 | 82.03742 |
| 2364.783          | 85.44586 | 82.02721 |
| 2365.265          | 85.43849 | 82.01707 |
| 2365.747          | 85.43087 | 82.00713 |
| 2366.229          | 85.42298 | 81.99737 |
| 2366.711          | 85.41482 | 81.98773 |
| 2367.193          | 85.40632 | 81.97858 |
| 2367.676          | 85.39748 | 81.97006 |
| 2368.157          | 85.38821 | 81.96265 |
| 2368.64           | 85.37844 | 81.95721 |
| 2369.122          | 85.36823 | 81.95284 |
| 2369.604          | 85.3576  | 81.94899 |
| 2370.086          | 85.34657 | 81.94543 |
| 2370.568          | 85.33513 | 81.94172 |
| 2371.05           | 85.32329 | 81.93791 |
| 2371.532          | 85.31106 | 81.93398 |
| 2372.014          | 85.29848 | 81.92979 |
| 2372.497          | 85.28565 | 81.9253  |
| 2372.979          | 85.27243 | 81.92025 |
| 2373.461          | 85.25875 | 81.91439 |
| 2373.943          | 85.24461 | 81.90766 |
| 2374.425          | 85.22999 | 81.90012 |
| 2374.907          | 85.21479 | 81.89121 |
| 2375.389          | 85.19896 | 81.88066 |
| 2375.872          | 85.1823  | 81.8677  |
| 2376.354          | 85.16451 | 81.85103 |
| 2376.836          | 85.1459  | 81.83193 |
| 2377.318          | 85.12673 | 81.81118 |
| 2377.8            | 85.10706 | 81.78904 |
| 2378.282          | 85.08703 | 81.76603 |
| 2378.764          | 85.06664 | 81.74212 |
| 2379.246          | 85.04594 | 81.71737 |
| 2379.729          | 85.02499 | 81.69209 |
| 2380.21           | 85.0039  | 81.66657 |
| 2380.693          | 84.98266 | 81.64079 |
| 2381.175          | 84.9613  | 81.61476 |
| 2381.657          | 84.93985 | 81.58852 |
| 2382.139          | 84.91832 | 81.56201 |
| 2382.621          | 84.89678 | 81.53556 |
| 2383.103          | 84.87532 | 81.50933 |
| 2383.585          | 84.85404 | 81.48365 |
| 2384.067          | 84.83314 | 81.45905 |
| 2384.55           | 84.81245 | 81.4351  |
| 2385.032          | 84.79193 | 81.41153 |
| 2385.514          | 84.77156 | 81.38832 |
| 2385.996          | 84.75133 | 81.36533 |
| 2386.478          | 84.73123 | 81.34256 |
| 2386.96           | 84.71128 | 81.32005 |
| 2387.442          | 84.69143 | 81.29762 |
| 2387.924          | 84.67159 | 81.27506 |
| 2388.406          | 84.65186 | 81.25263 |
| 2388.889          | 84.63235 | 81.23049 |
| 2389.371          | 84.61306 | 81.20867 |



| Wavenumber (cm-1) | After    | Before   |
|-------------------|----------|----------|
| 2389.853          | 84.59402 | 81.1872  |
| 2390.335          | 84.57531 | 81.16623 |
| 2390.817          | 84.55698 | 81.14581 |
| 2391.299          | 84.53917 | 81.12621 |
| 2391.781          | 84.52214 | 81.10787 |
| 2392.263          | 84.50562 | 81.09034 |
| 2392.746          | 84.48947 | 81.07331 |
| 2393.228          | 84.47364 | 81.05668 |
| 2393.71           | 84.45802 | 81.04023 |
| 2394.192          | 84.44261 | 81.024   |
| 2394.674          | 84.42741 | 81.00794 |
| 2395.156          | 84.41232 | 80.99197 |
| 2395.638          | 84.39729 | 80.97606 |
| 2396.12           | 84.38234 | 80.96009 |
| 2396.603          | 84.36747 | 80.94398 |
| 2397.085          | 84.35267 | 80.92772 |
| 2397.567          | 84.33794 | 80.91131 |
| 2398.049          | 84.32323 | 80.89452 |
| 2398.531          | 84.30854 | 80.87724 |
| 2399.013          | 84.29379 | 80.85915 |
| 2399.495          | 84.27895 | 80.83973 |
| 2399.977          | 84.26405 | 80.8195  |
| 2400.459          | 84.24907 | 80.79873 |
| 2400.942          | 84.23403 | 80.77753 |
| 2401.424          | 84.21891 | 80.75609 |
| 2401.906          | 84.20372 | 80.73438 |
| 2402.388          | 84.18845 | 80.71243 |
| 2402.87           | 84.17312 | 80.69035 |
| 2403.352          | 84.15778 | 80.66825 |
| 2403.834          | 84.14233 | 80.6461  |
| 2404.316          | 84.12673 | 80.62389 |
| 2404.799          | 84.11097 | 80.60165 |
| 2405.281          | 84.09503 | 80.57935 |
| 2405.763          | 84.07883 | 80.55712 |
| 2406.245          | 84.06235 | 80.53499 |
| 2406.727          | 84.04543 | 80.5131  |
| 2407.209          | 84.02787 | 80.49168 |
| 2407.691          | 84.0099  | 80.47052 |
| 2408.173          | 83.99164 | 80.44951 |
| 2408.656          | 83.97313 | 80.4286  |
| 2409.137          | 83.95448 | 80.40773 |
| 2409.62           | 83.93565 | 80.38692 |
| 2410.102          | 83.91669 | 80.36614 |
| 2410.584          | 83.8976  | 80.34536 |
| 2411.066          | 83.87842 | 80.32452 |
| 2411.548          | 83.85918 | 80.30367 |
| 2412.03           | 83.83992 | 80.28281 |
| 2412.512          | 83.82064 | 80.26193 |
| 2412.994          | 83.80134 | 80.24107 |
| 2413.477          | 83.78207 | 80.22017 |
| 2413.959          | 83.76293 | 80.19926 |
| 2414.441          | 83.74401 | 80.17828 |
| 2414.923          | 83.72554 | 80.15723 |
| 2415.405          | 83.7073  | 80.13613 |
| 2415.887          | 83.68918 | 80.115   |

| Wavenumber (cm-1) | After    | Before   |
|-------------------|----------|----------|
| 2416.369          | 83.67111 | 80.09384 |
| 2416.851          | 83.65304 | 80.07264 |
| 2417.333          | 83.63496 | 80.05141 |
| 2417.816          | 83.61689 | 80.03014 |
| 2418.298          | 83.59876 | 80.00887 |
| 2418.78           | 83.58059 | 79.9876  |
| 2419.262          | 83.56232 | 79.96632 |
| 2419.744          | 83.54395 | 79.94501 |
| 2420.226          | 83.52545 | 79.92365 |
| 2420.708          | 83.50685 | 79.90225 |
| 2421.19           | 83.48805 | 79.88076 |
| 2421.673          | 83.46901 | 79.85919 |
| 2422.155          | 83.44962 | 79.83746 |
| 2422.637          | 83.42964 | 79.81549 |
| 2423.119          | 83.40929 | 79.79339 |
| 2423.601          | 83.38872 | 79.7712  |
| 2424.083          | 83.36797 | 79.74899 |
| 2424.565          | 83.34712 | 79.7268  |
| 2425.047          | 83.32619 | 79.70461 |
| 2425.53           | 83.30518 | 79.68243 |
| 2426.012          | 83.28409 | 79.66023 |
| 2426.494          | 83.26299 | 79.638   |
| 2426.976          | 83.24189 | 79.61582 |
| 2427.458          | 83.22084 | 79.59377 |
| 2427.94           | 83.19984 | 79.57184 |
| 2428.422          | 83.17888 | 79.55003 |
| 2428.904          | 83.15804 | 79.52848 |
| 2429.386          | 83.13741 | 79.50726 |
| 2429.869          | 83.11707 | 79.48657 |
| 2430.351          | 83.09725 | 79.46677 |
| 2430.833          | 83.07777 | 79.44746 |
| 2431.315          | 83.05847 | 79.42844 |
| 2431.797          | 83.03932 | 79.40962 |
| 2432.279          | 83.02024 | 79.3908  |
| 2432.761          | 83.00124 | 79.37201 |
| 2433.243          | 82.98229 | 79.35323 |
| 2433.726          | 82.96338 | 79.33438 |
| 2434.208          | 82.94444 | 79.31544 |
| 2434.69           | 82.92549 | 79.2963  |
| 2435.172          | 82.90651 | 79.27691 |
| 2435.654          | 82.8875  | 79.25725 |
| 2436.136          | 82.86847 | 79.23731 |
| 2436.618          | 82.84936 | 79.21693 |
| 2437.1            | 82.83012 | 79.196   |
| 2437.583          | 82.81071 | 79.17426 |
| 2438.064          | 82.79099 | 79.15129 |
| 2438.547          | 82.77106 | 79.1275  |
| 2439.029          | 82.75101 | 79.10313 |
| 2439.511          | 82.73087 | 79.07824 |
| 2439.993          | 82.71066 | 79.05299 |
| 2440.475          | 82.69039 | 79.02738 |
| 2440.957          | 82.67005 | 79.00144 |
| 2441.439          | 82.64968 | 78.9753  |
| 2441.921          | 82.6293  | 78.94914 |
| 2442.404          | 82.60893 | 78.9228  |

| Wavenumber (cm-1) | After    | Before   |
|-------------------|----------|----------|
| 2442.886          | 82.58852 | 78.89626 |
| 2443.368          | 82.56811 | 78.86948 |
| 2443.85           | 82.54766 | 78.84248 |
| 2444.332          | 82.52721 | 78.81522 |
| 2444.814          | 82.50676 | 78.78773 |
| 2445.296          | 82.48633 | 78.7599  |
| 2445.778          | 82.46595 | 78.73158 |
| 2446.26           | 82.4456  | 78.70298 |
| 2446.743          | 82.42527 | 78.67425 |
| 2447.225          | 82.40494 | 78.64546 |
| 2447.707          | 82.38461 | 78.61675 |
| 2448.189          | 82.3643  | 78.5881  |
| 2448.671          | 82.34398 | 78.55953 |
| 2449.153          | 82.32367 | 78.53103 |
| 2449.635          | 82.30334 | 78.50252 |
| 2450.117          | 82.28302 | 78.47424 |
| 2450.6            | 82.2627  | 78.44636 |
| 2451.082          | 82.2424  | 78.41889 |
| 2451.564          | 82.22211 | 78.39184 |
| 2452.046          | 82.20184 | 78.36552 |
| 2452.528          | 82.18159 | 78.34007 |
| 2453.01           | 82.16138 | 78.31594 |
| 2453.492          | 82.14124 | 78.29392 |
| 2453.974          | 82.12114 | 78.27321 |
| 2454.457          | 82.10106 | 78.25334 |
| 2454.939          | 82.08099 | 78.23415 |
| 2455.421          | 82.06094 | 78.21528 |
| 2455.903          | 82.04089 | 78.19679 |
| 2456.385          | 82.02084 | 78.17863 |
| 2456.867          | 82.00079 | 78.16065 |
| 2457.349          | 81.98073 | 78.14276 |
| 2457.831          | 81.96066 | 78.12487 |
| 2458.313          | 81.94057 | 78.10686 |
| 2458.796          | 81.92049 | 78.08869 |
| 2459.278          | 81.90038 | 78.07042 |
| 2459.76           | 81.88025 | 78.0517  |
| 2460.242          | 81.86008 | 78.03237 |
| 2460.724          | 81.83986 | 78.01202 |
| 2461.206          | 81.81956 | 77.98994 |
| 2461.688          | 81.79921 | 77.96677 |
| 2462.17           | 81.77882 | 77.94297 |
| 2462.653          | 81.75842 | 77.91866 |
| 2463.135          | 81.73798 | 77.89411 |
| 2463.617          | 81.71752 | 77.86931 |
| 2464.099          | 81.69704 | 77.84427 |
| 2464.581          | 81.67657 | 77.81913 |
| 2465.063          | 81.65611 | 77.79402 |
| 2465.545          | 81.63563 | 77.76894 |
| 2466.027          | 81.61513 | 77.74393 |
| 2466.51           | 81.59461 | 77.71898 |
| 2466.992          | 81.57409 | 77.69406 |
| 2467.474          | 81.55351 | 77.66938 |
| 2467.956          | 81.53292 | 77.64503 |
| 2468.438          | 81.51225 | 77.62125 |
| 2468.92           | 81.49146 | 77.59844 |

| Wavenumber (cm-1) | After    | Before   |
|-------------------|----------|----------|
| 2469.402          | 81.47062 | 77.57623 |
| 2469.884          | 81.44975 | 77.55437 |
| 2470.366          | 81.42888 | 77.53279 |
| 2470.849          | 81.40804 | 77.51133 |
| 2471.331          | 81.38722 | 77.49002 |
| 2471.813          | 81.36643 | 77.46886 |
| 2472.295          | 81.34566 | 77.44776 |
| 2472.777          | 81.3249  | 77.42669 |
| 2473.259          | 81.30418 | 77.40562 |
| 2473.741          | 81.28357 | 77.38451 |
| 2474.223          | 81.26305 | 77.36334 |
| 2474.706          | 81.24262 | 77.34216 |
| 2475.188          | 81.22236 | 77.32086 |
| 2475.67           | 81.20229 | 77.29932 |
| 2476.152          | 81.1825  | 77.2774  |
| 2476.634          | 81.1632  | 77.25477 |
| 2477.116          | 81.14418 | 77.23176 |
| 2477.598          | 81.12535 | 77.20853 |
| 2478.08           | 81.10666 | 77.18517 |
| 2478.563          | 81.08803 | 77.16181 |
| 2479.044          | 81.06945 | 77.13842 |
| 2479.527          | 81.05093 | 77.11503 |
| 2480.009          | 81.03243 | 77.09169 |
| 2480.491          | 81.01395 | 77.06844 |
| 2480.973          | 80.99546 | 77.04531 |
| 2481.455          | 80.97691 | 77.02236 |
| 2481.937          | 80.95827 | 76.9996  |
| 2482.419          | 80.93958 | 76.97701 |
| 2482.901          | 80.92072 | 76.95474 |
| 2483.384          | 80.90166 | 76.93282 |
| 2483.866          | 80.88226 | 76.91147 |
| 2484.348          | 80.8623  | 76.89098 |
| 2484.83           | 80.84201 | 76.87104 |
| 2485.312          | 80.8215  | 76.85149 |
| 2485.794          | 80.80085 | 76.83226 |
| 2486.276          | 80.78012 | 76.81324 |
| 2486.758          | 80.75929 | 76.79443 |
| 2487.24           | 80.7384  | 76.77583 |
| 2487.723          | 80.71746 | 76.75733 |
| 2488.205          | 80.69652 | 76.73885 |
| 2488.687          | 80.67559 | 76.72044 |
| 2489.169          | 80.6547  | 76.7021  |
| 2489.651          | 80.63386 | 76.68385 |
| 2490.133          | 80.61304 | 76.66567 |
| 2490.615          | 80.59235 | 76.64755 |
| 2491.097          | 80.57182 | 76.62945 |
| 2491.58           | 80.55157 | 76.61137 |
| 2492.062          | 80.53178 | 76.59329 |
| 2492.544          | 80.51228 | 76.5752  |
| 2493.026          | 80.49294 | 76.55708 |
| 2493.508          | 80.47372 | 76.5389  |
| 2493.99           | 80.45454 | 76.52061 |
| 2494.472          | 80.43542 | 76.50226 |
| 2494.954          | 80.41635 | 76.48382 |
| 2495.437          | 80.39728 | 76.46535 |

| Wavenumber (cm-1) | After    | Before   |
|-------------------|----------|----------|
| 2495.919          | 80.3782  | 76.44693 |
| 2496.401          | 80.35911 | 76.4284  |
| 2496.883          | 80.33995 | 76.40965 |
| 2497.365          | 80.32075 | 76.39065 |
| 2497.847          | 80.30148 | 76.37144 |
| 2498.329          | 80.2821  | 76.35182 |
| 2498.811          | 80.26254 | 76.3317  |
| 2499.293          | 80.24271 | 76.31083 |
| 2499.776          | 80.22243 | 76.28873 |
| 2500.258          | 80.20187 | 76.26587 |
| 2500.74           | 80.18115 | 76.24258 |
| 2501.222          | 80.16031 | 76.21899 |
| 2501.704          | 80.1394  | 76.19534 |
| 2502.186          | 80.11844 | 76.17158 |
| 2502.668          | 80.09743 | 76.14772 |
| 2503.15           | 80.0764  | 76.12383 |
| 2503.633          | 80.0554  | 76.09988 |
| 2504.115          | 80.03442 | 76.07604 |
| 2504.597          | 80.01349 | 76.05253 |
| 2505.079          | 79.9926  | 76.02934 |
| 2505.561          | 79.97174 | 76.00644 |
| 2506.043          | 79.95098 | 75.9842  |
| 2506.525          | 79.93034 | 75.96279 |
| 2507.007          | 79.9099  | 75.94274 |
| 2507.49           | 79.88976 | 75.92493 |
| 2507.971          | 79.8698  | 75.90846 |
| 2508.454          | 79.84999 | 75.89277 |
| 2508.936          | 79.83029 | 75.87767 |
| 2509.418          | 79.8107  | 75.86275 |
| 2509.9            | 79.79119 | 75.84805 |
| 2510.382          | 79.77177 | 75.83353 |
| 2510.864          | 79.75238 | 75.81906 |
| 2511.346          | 79.73296 | 75.80453 |
| 2511.828          | 79.71355 | 75.78979 |
| 2512.311          | 79.69424 | 75.77467 |
| 2512.793          | 79.67503 | 75.75916 |
| 2513.275          | 79.65591 | 75.74327 |
| 2513.757          | 79.63693 | 75.72659 |
| 2514.239          | 79.6181  | 75.70891 |
| 2514.721          | 79.59956 | 75.68962 |
| 2515.203          | 79.58147 | 75.66776 |
| 2515.685          | 79.56361 | 75.64429 |
| 2516.167          | 79.54588 | 75.61979 |
| 2516.65           | 79.52818 | 75.59446 |
| 2517.132          | 79.51042 | 75.5687  |
| 2517.614          | 79.49263 | 75.54245 |
| 2518.096          | 79.47478 | 75.51577 |
| 2518.578          | 79.45686 | 75.48883 |
| 2519.06           | 79.43893 | 75.46185 |
| 2519.542          | 79.42085 | 75.43483 |
| 2520.024          | 79.40249 | 75.40783 |
| 2520.507          | 79.38384 | 75.38088 |
| 2520.989          | 79.3649  | 75.35391 |
| 2521.471          | 79.34547 | 75.32723 |
| 2521.953          | 79.32543 | 75.301   |

| Wavenumber (cm-1) | After    | Before   |
|-------------------|----------|----------|
| 2522.435          | 79.30444 | 75.27558 |
| 2522.917          | 79.28196 | 75.25156 |
| 2523.399          | 79.25854 | 75.22839 |
| 2523.881          | 79.23455 | 75.2057  |
| 2524.364          | 79.21011 | 75.18344 |
| 2524.846          | 79.1855  | 75.16137 |
| 2525.328          | 79.16068 | 75.1395  |
| 2525.81           | 79.13567 | 75.11784 |
| 2526.292          | 79.11057 | 75.09625 |
| 2526.774          | 79.08541 | 75.0746  |
| 2527.256          | 79.06032 | 75.05293 |
| 2527.738          | 79.03541 | 75.03127 |
| 2528.22           | 79.01071 | 75.00964 |
| 2528.703          | 78.9862  | 74.98804 |
| 2529.185          | 78.96216 | 74.96639 |
| 2529.667          | 78.93874 | 74.94465 |
| 2530.149          | 78.91637 | 74.92272 |
| 2530.631          | 78.89571 | 74.90044 |
| 2531.113          | 78.87609 | 74.87795 |
| 2531.595          | 78.85711 | 74.85532 |
| 2532.077          | 78.83862 | 74.83259 |
| 2532.56           | 78.82032 | 74.80978 |
| 2533.042          | 78.80225 | 74.78689 |
| 2533.524          | 78.78439 | 74.76392 |
| 2534.006          | 78.76665 | 74.74093 |
| 2534.488          | 78.74887 | 74.71797 |
| 2534.97           | 78.73104 | 74.695   |
| 2535.452          | 78.71306 | 74.67195 |
| 2535.934          | 78.69491 | 74.64883 |
| 2536.417          | 78.67663 | 74.62562 |
| 2536.898          | 78.65795 | 74.60228 |
| 2537.381          | 78.63875 | 74.57881 |
| 2537.863          | 78.61866 | 74.55513 |
| 2538.345          | 78.59711 | 74.53111 |
| 2538.827          | 78.57468 | 74.5069  |
| 2539.309          | 78.55171 | 74.48259 |
| 2539.791          | 78.52831 | 74.4582  |
| 2540.273          | 78.50475 | 74.43382 |
| 2540.755          | 78.48096 | 74.40943 |
| 2541.238          | 78.45698 | 74.38505 |
| 2541.72           | 78.43292 | 74.36068 |
| 2542.202          | 78.40887 | 74.33634 |
| 2542.684          | 78.38486 | 74.31208 |
| 2543.166          | 78.36095 | 74.28796 |
| 2543.648          | 78.33716 | 74.26397 |
| 2544.13           | 78.31343 | 74.24011 |
| 2544.612          | 78.28999 | 74.21648 |
| 2545.094          | 78.26692 | 74.19315 |
| 2545.577          | 78.24449 | 74.17024 |
| 2546.059          | 78.22314 | 74.14802 |
| 2546.541          | 78.20243 | 74.12621 |
| 2547.023          | 78.18212 | 74.1047  |
| 2547.505          | 78.16212 | 74.08343 |
| 2547.987          | 78.14227 | 74.06229 |
| 2548.469          | 78.12257 | 74.04131 |

| Wavenumber (cm-1) | After    | Before   |
|-------------------|----------|----------|
| 2548.951          | 78.10303 | 74.02049 |
| 2549.434          | 78.08354 | 73.99978 |
| 2549.916          | 78.06403 | 73.97918 |
| 2550.398          | 78.04447 | 73.95863 |
| 2550.88           | 78.02488 | 73.93812 |
| 2551.362          | 78.00525 | 73.9176  |
| 2551.844          | 77.98559 | 73.8971  |
| 2552.326          | 77.96577 | 73.87652 |
| 2552.808          | 77.94574 | 73.85579 |
| 2553.291          | 77.92538 | 73.83473 |
| 2553.773          | 77.90443 | 73.81309 |
| 2554.255          | 77.88312 | 73.79114 |
| 2554.737          | 77.86157 | 73.76905 |
| 2555.219          | 77.83984 | 73.74691 |
| 2555.701          | 77.81798 | 73.72485 |
| 2556.183          | 77.79601 | 73.70283 |
| 2556.665          | 77.77393 | 73.68088 |
| 2557.147          | 77.75178 | 73.65901 |
| 2557.63           | 77.72964 | 73.63723 |
| 2558.112          | 77.70749 | 73.61563 |
| 2558.594          | 77.68527 | 73.59431 |
| 2559.076          | 77.66301 | 73.57325 |
| 2559.558          | 77.64069 | 73.55245 |
| 2560.04           | 77.61832 | 73.5321  |
| 2560.522          | 77.5959  | 73.51227 |
| 2561.004          | 77.57346 | 73.49323 |
| 2561.487          | 77.55099 | 73.47543 |
| 2561.969          | 77.52849 | 73.45842 |
| 2562.451          | 77.50598 | 73.44192 |
| 2562.933          | 77.48348 | 73.42581 |
| 2563.415          | 77.461   | 73.4099  |
| 2563.897          | 77.43853 | 73.3942  |
| 2564.379          | 77.41608 | 73.37871 |
| 2564.861          | 77.39365 | 73.36336 |
| 2565.344          | 77.37125 | 73.34808 |
| 2565.825          | 77.34888 | 73.33283 |
| 2566.308          | 77.3266  | 73.31749 |
| 2566.79           | 77.30437 | 73.30203 |
| 2567.272          | 77.28223 | 73.2865  |
| 2567.754          | 77.26021 | 73.27065 |
| 2568.236          | 77.23831 | 73.25437 |
| 2568.718          | 77.21659 | 73.23734 |
| 2569.2            | 77.19514 | 73.21903 |
| 2569.682          | 77.17387 | 73.19997 |
| 2570.165          | 77.15274 | 73.18047 |
| 2570.647          | 77.13173 | 73.16065 |
| 2571.129          | 77.11083 | 73.14076 |
| 2571.611          | 77.09004 | 73.12075 |
| 2572.093          | 77.06936 | 73.10064 |
| 2572.575          | 77.04874 | 73.08048 |
| 2573.057          | 77.02818 | 73.06033 |
| 2573.539          | 77.0077  | 73.0403  |
| 2574.021          | 76.9873  | 73.02048 |
| 2574.504          | 76.96699 | 73.00087 |
| 2574.986          | 76.94675 | 72.98145 |

| Wavenumber (cm-1) | After    | Before   |
|-------------------|----------|----------|
| 2575.468          | 76.92664 | 72.96249 |
| 2575.95           | 76.90661 | 72.94412 |
| 2576.432          | 76.88668 | 72.92671 |
| 2576.914          | 76.86689 | 72.91089 |
| 2577.396          | 76.8472  | 72.89602 |
| 2577.878          | 76.82759 | 72.8817  |
| 2578.361          | 76.80806 | 72.86779 |
| 2578.843          | 76.78857 | 72.85398 |
| 2579.325          | 76.76915 | 72.84033 |
| 2579.807          | 76.74976 | 72.82681 |
| 2580.289          | 76.73042 | 72.81335 |
| 2580.771          | 76.71111 | 72.79991 |
| 2581.253          | 76.6918  | 72.78635 |
| 2581.735          | 76.67252 | 72.77248 |
| 2582.218          | 76.65324 | 72.7583  |
| 2582.7            | 76.63397 | 72.74384 |
| 2583.182          | 76.6147  | 72.72871 |
| 2583.664          | 76.59541 | 72.71274 |
| 2584.146          | 76.57608 | 72.69538 |
| 2584.628          | 76.55669 | 72.67574 |
| 2585.11           | 76.53725 | 72.65473 |
| 2585.592          | 76.51779 | 72.63292 |
| 2586.074          | 76.49829 | 72.61052 |
| 2586.557          | 76.47878 | 72.58792 |
| 2587.039          | 76.45922 | 72.5651  |
| 2587.521          | 76.43962 | 72.54208 |
| 2588.003          | 76.42    | 72.51902 |
| 2588.485          | 76.4003  | 72.496   |
| 2588.967          | 76.38058 | 72.47317 |
| 2589.449          | 76.36082 | 72.4507  |
| 2589.931          | 76.34103 | 72.42865 |
| 2590.414          | 76.32119 | 72.40696 |
| 2590.896          | 76.30133 | 72.38607 |
| 2591.378          | 76.28146 | 72.36621 |
| 2591.86           | 76.26159 | 72.34799 |
| 2592.342          | 76.24181 | 72.33244 |
| 2592.824          | 76.22204 | 72.31852 |
| 2593.306          | 76.20222 | 72.30566 |
| 2593.788          | 76.18233 | 72.29361 |
| 2594.271          | 76.16235 | 72.28198 |
| 2594.752          | 76.14224 | 72.27077 |
| 2595.235          | 76.12205 | 72.25996 |
| 2595.717          | 76.10173 | 72.24936 |
| 2596.199          | 76.08131 | 72.23872 |
| 2596.681          | 76.06073 | 72.22804 |
| 2597.163          | 76.03996 | 72.21726 |
| 2597.645          | 76.01898 | 72.20637 |
| 2598.127          | 75.99781 | 72.1954  |
| 2598.609          | 75.97636 | 72.18404 |
| 2599.092          | 75.95461 | 72.17217 |
| 2599.574          | 75.93243 | 72.15938 |
| 2600.056          | 75.90968 | 72.14511 |
| 2600.538          | 75.8865  | 72.1299  |
| 2601.02           | 75.86301 | 72.11407 |
| 2601.502          | 75.83925 | 72.09768 |



| Wavenumber (cm-1) | After    | Before   |
|-------------------|----------|----------|
| 2601.984          | 75.81528 | 72.08096 |
| 2602.466          | 75.79112 | 72.06387 |
| 2602.948          | 75.76677 | 72.04643 |
| 2603.431          | 75.74226 | 72.02879 |
| 2603.913          | 75.71768 | 72.0111  |
| 2604.395          | 75.69298 | 71.99327 |
| 2604.877          | 75.66816 | 71.97521 |
| 2605.359          | 75.64323 | 71.95691 |
| 2605.841          | 75.61819 | 71.93835 |
| 2606.323          | 75.59305 | 71.91956 |
| 2606.805          | 75.56784 | 71.90053 |
| 2607.288          | 75.54256 | 71.88125 |
| 2607.77           | 75.51725 | 71.86167 |
| 2608.252          | 75.49188 | 71.84188 |
| 2608.734          | 75.46647 | 71.8219  |
| 2609.216          | 75.44104 | 71.80178 |
| 2609.698          | 75.4156  | 71.78159 |
| 2610.18           | 75.39015 | 71.76128 |
| 2610.662          | 75.36469 | 71.74088 |
| 2611.145          | 75.3392  | 71.72036 |
| 2611.627          | 75.31364 | 71.69967 |
| 2612.109          | 75.28807 | 71.67893 |
| 2612.591          | 75.26258 | 71.65826 |
| 2613.073          | 75.23717 | 71.63764 |
| 2613.555          | 75.21182 | 71.61707 |
| 2614.037          | 75.18667 | 71.59673 |
| 2614.519          | 75.16173 | 71.57668 |
| 2615.001          | 75.13716 | 71.55718 |
| 2615.484          | 75.11321 | 71.53864 |
| 2615.966          | 75.08962 | 71.52061 |
| 2616.448          | 75.06622 | 71.50284 |
| 2616.93           | 75.04295 | 71.48524 |
| 2617.412          | 75.01969 | 71.46758 |
| 2617.894          | 74.99645 | 71.44994 |
| 2618.376          | 74.97322 | 71.43224 |
| 2618.858          | 74.94996 | 71.41447 |
| 2619.341          | 74.92664 | 71.39657 |
| 2619.823          | 74.90323 | 71.37846 |
| 2620.305          | 74.87963 | 71.36002 |
| 2620.787          | 74.85585 | 71.34123 |
| 2621.269          | 74.83189 | 71.32211 |
| 2621.751          | 74.80763 | 71.30245 |
| 2622.233          | 74.78299 | 71.28209 |
| 2622.715          | 74.75775 | 71.26071 |
| 2623.198          | 74.73161 | 71.23775 |
| 2623.679          | 74.70489 | 71.21375 |
| 2624.162          | 74.67778 | 71.18909 |
| 2624.644          | 74.65034 | 71.16385 |
| 2625.126          | 74.6227  | 71.13828 |
| 2625.608          | 74.59486 | 71.11239 |
| 2626.09           | 74.56683 | 71.08618 |
| 2626.572          | 74.53867 | 71.05977 |
| 2627.054          | 74.51044 | 71.0333  |
| 2627.536          | 74.48214 | 71.00677 |
| 2628.019          | 74.4538  | 70.9802  |

| Wavenumber (cm-1) | After    | Before   |
|-------------------|----------|----------|
| 2628.501          | 74.42543 | 70.95361 |
| 2628.983          | 74.39702 | 70.92698 |
| 2629.465          | 74.36865 | 70.90048 |
| 2629.947          | 74.34037 | 70.87417 |
| 2630.429          | 74.31232 | 70.84827 |
| 2630.911          | 74.28469 | 70.82305 |
| 2631.393          | 74.2573  | 70.79827 |
| 2631.875          | 74.23003 | 70.77375 |
| 2632.358          | 74.20284 | 70.74948 |
| 2632.84           | 74.17567 | 70.72536 |
| 2633.322          | 74.14854 | 70.70139 |
| 2633.804          | 74.1214  | 70.67757 |
| 2634.286          | 74.09424 | 70.65382 |
| 2634.768          | 74.06699 | 70.63004 |
| 2635.25           | 74.0397  | 70.60632 |
| 2635.732          | 74.01235 | 70.58272 |
| 2636.215          | 73.98496 | 70.55927 |
| 2636.697          | 73.95753 | 70.53596 |
| 2637.179          | 73.93004 | 70.51284 |
| 2637.661          | 73.90247 | 70.48991 |
| 2638.143          | 73.87479 | 70.46729 |
| 2638.625          | 73.84697 | 70.44508 |
| 2639.107          | 73.81903 | 70.42313 |
| 2639.589          | 73.791   | 70.40136 |
| 2640.072          | 73.76287 | 70.3797  |
| 2640.554          | 73.73466 | 70.35809 |
| 2641.036          | 73.70636 | 70.33654 |
| 2641.518          | 73.67797 | 70.31501 |
| 2642              | 73.64951 | 70.29349 |
| 2642.482          | 73.62096 | 70.2719  |
| 2642.964          | 73.59235 | 70.25026 |
| 2643.446          | 73.56364 | 70.22854 |
| 2643.928          | 73.53482 | 70.20673 |
| 2644.411          | 73.50591 | 70.18482 |
| 2644.893          | 73.47687 | 70.16276 |
| 2645.375          | 73.44772 | 70.14052 |
| 2645.857          | 73.41844 | 70.11802 |
| 2646.339          | 73.38899 | 70.09519 |
| 2646.821          | 73.35943 | 70.07208 |
| 2647.303          | 73.32974 | 70.04875 |
| 2647.785          | 73.29993 | 70.02517 |
| 2648.268          | 73.27001 | 70.00135 |
| 2648.75           | 73.23998 | 69.9773  |
| 2649.232          | 73.20986 | 69.95304 |
| 2649.714          | 73.17966 | 69.92863 |
| 2650.196          | 73.14943 | 69.90419 |
| 2650.678          | 73.1191  | 69.87957 |
| 2651.16           | 73.08868 | 69.85463 |
| 2651.642          | 73.05814 | 69.82937 |
| 2652.125          | 73.02749 | 69.8038  |
| 2652.606          | 72.9967  | 69.77773 |
| 2653.089          | 72.96576 | 69.75111 |
| 2653.571          | 72.93457 | 69.72366 |
| 2654.053          | 72.90302 | 69.69489 |
| 2654.535          | 72.87125 | 69.66533 |

| Wavenumber (cm-1) | After    | Before   |
|-------------------|----------|----------|
| 2655.017          | 72.83934 | 69.63529 |
| 2655.499          | 72.80736 | 69.60493 |
| 2655.981          | 72.77538 | 69.57448 |
| 2656.463          | 72.74336 | 69.54392 |
| 2656.946          | 72.71135 | 69.51331 |
| 2657.428          | 72.67935 | 69.48272 |
| 2657.91           | 72.64738 | 69.45222 |
| 2658.392          | 72.61547 | 69.42193 |
| 2658.874          | 72.58369 | 69.39196 |
| 2659.356          | 72.55206 | 69.36236 |
| 2659.838          | 72.52055 | 69.3331  |
| 2660.32           | 72.4893  | 69.30447 |
| 2660.802          | 72.45834 | 69.27659 |
| 2661.285          | 72.42783 | 69.24986 |
| 2661.767          | 72.39799 | 69.22485 |
| 2662.249          | 72.36862 | 69.201   |
| 2662.731          | 72.33956 | 69.178   |
| 2663.213          | 72.31075 | 69.15572 |
| 2663.695          | 72.28212 | 69.134   |
| 2664.177          | 72.25365 | 69.11282 |
| 2664.659          | 72.22535 | 69.09214 |
| 2665.142          | 72.19716 | 69.07176 |
| 2665.624          | 72.16899 | 69.0514  |
| 2666.106          | 72.1409  | 69.0313  |
| 2666.588          | 72.11287 | 69.01162 |
| 2667.07           | 72.08491 | 68.99233 |
| 2667.552          | 72.05704 | 68.97344 |
| 2668.034          | 72.02919 | 68.95507 |
| 2668.516          | 72.00136 | 68.93723 |
| 2668.999          | 71.97353 | 68.92016 |
| 2669.481          | 71.94565 | 68.90426 |
| 2669.963          | 71.91774 | 68.88902 |
| 2670.445          | 71.88981 | 68.87415 |
| 2670.927          | 71.86187 | 68.85948 |
| 2671.409          | 71.8339  | 68.84471 |
| 2671.891          | 71.80591 | 68.8299  |
| 2672.373          | 71.77787 | 68.81502 |
| 2672.855          | 71.74982 | 68.80006 |
| 2673.338          | 71.72176 | 68.78513 |
| 2673.82           | 71.69367 | 68.76988 |
| 2674.302          | 71.66551 | 68.75395 |
| 2674.784          | 71.63725 | 68.73729 |
| 2675.266          | 71.60892 | 68.71992 |
| 2675.748          | 71.58045 | 68.70126 |
| 2676.23           | 71.55185 | 68.68105 |
| 2676.712          | 71.52303 | 68.65839 |
| 2677.195          | 71.4939  | 68.63184 |
| 2677.677          | 71.46457 | 68.60289 |
| 2678.159          | 71.43509 | 68.57243 |
| 2678.641          | 71.40547 | 68.54081 |
| 2679.123          | 71.37576 | 68.50868 |
| 2679.605          | 71.34592 | 68.47596 |
| 2680.087          | 71.31601 | 68.44274 |
| 2680.569          | 71.28603 | 68.40929 |
| 2681.052          | 71.25603 | 68.3758  |

| Wavenumber (cm-1) | After    | Before   |
|-------------------|----------|----------|
| 2681.533          | 71.22601 | 68.34247 |
| 2682.016          | 71.1959  | 68.3095  |
| 2682.498          | 71.16571 | 68.27698 |
| 2682.98           | 71.13547 | 68.24481 |
| 2683.462          | 71.10513 | 68.21365 |
| 2683.944          | 71.07471 | 68.18378 |
| 2684.426          | 71.04412 | 68.15604 |
| 2684.908          | 71.01334 | 68.13182 |
| 2685.39           | 70.98242 | 68.10978 |
| 2685.873          | 70.95145 | 68.08914 |
| 2686.355          | 70.92046 | 68.06965 |
| 2686.837          | 70.88949 | 68.05077 |
| 2687.319          | 70.85854 | 68.03257 |
| 2687.801          | 70.82762 | 68.01501 |
| 2688.283          | 70.79673 | 67.99783 |
| 2688.765          | 70.76584 | 67.98074 |
| 2689.247          | 70.73505 | 67.96378 |
| 2689.729          | 70.70438 | 67.94692 |
| 2690.212          | 70.67387 | 67.93012 |
| 2690.694          | 70.64351 | 67.91345 |
| 2691.176          | 70.6134  | 67.89656 |
| 2691.658          | 70.58362 | 67.87927 |
| 2692.14           | 70.55428 | 67.86115 |
| 2692.622          | 70.5257  | 67.84144 |
| 2693.104          | 70.49757 | 67.82089 |
| 2693.586          | 70.46974 | 67.79986 |
| 2694.069          | 70.44216 | 67.77851 |
| 2694.551          | 70.41472 | 67.75716 |
| 2695.033          | 70.3874  | 67.73573 |
| 2695.515          | 70.3602  | 67.71423 |
| 2695.997          | 70.33307 | 67.69277 |
| 2696.479          | 70.30595 | 67.67143 |
| 2696.961          | 70.27884 | 67.65026 |
| 2697.443          | 70.25171 | 67.62936 |
| 2697.926          | 70.22456 | 67.60876 |
| 2698.408          | 70.19738 | 67.58839 |
| 2698.89           | 70.17009 | 67.56853 |
| 2699.372          | 70.14265 | 67.54932 |
| 2699.854          | 70.11494 | 67.5312  |
| 2700.336          | 70.08678 | 67.51481 |
| 2700.818          | 70.05834 | 67.49947 |
| 2701.3            | 70.02972 | 67.48473 |
| 2701.782          | 70.00094 | 67.47042 |
| 2702.265          | 69.97205 | 67.45619 |
| 2702.747          | 69.94307 | 67.44214 |
| 2703.229          | 69.91398 | 67.42822 |
| 2703.711          | 69.88483 | 67.41439 |
| 2704.193          | 69.85567 | 67.40069 |
| 2704.675          | 69.82648 | 67.38683 |
| 2705.157          | 69.79723 | 67.37257 |
| 2705.639          | 69.76789 | 67.35787 |
| 2706.122          | 69.73847 | 67.34281 |
| 2706.604          | 69.70897 | 67.32686 |
| 2707.086          | 69.67937 | 67.30978 |
| 2707.568          | 69.64968 | 67.2908  |

| Wavenumber (cm-1) | After    | Before   |
|-------------------|----------|----------|
| 2708.05           | 69.61983 | 67.26865 |
| 2708.532          | 69.58988 | 67.24465 |
| 2709.014          | 69.55988 | 67.21961 |
| 2709.496          | 69.52983 | 67.19384 |
| 2709.979          | 69.49977 | 67.16801 |
| 2710.461          | 69.46968 | 67.14198 |
| 2710.943          | 69.43958 | 67.11578 |
| 2711.425          | 69.40945 | 67.08948 |
| 2711.907          | 69.37932 | 67.06303 |
| 2712.389          | 69.3492  | 67.03695 |
| 2712.871          | 69.31912 | 67.01171 |
| 2713.353          | 69.28911 | 66.98737 |
| 2713.835          | 69.25915 | 66.96381 |
| 2714.318          | 69.22929 | 66.94204 |
| 2714.8            | 69.19958 | 66.92252 |
| 2715.282          | 69.17013 | 66.90666 |
| 2715.764          | 69.14104 | 66.89693 |
| 2716.246          | 69.11219 | 66.89079 |
| 2716.728          | 69.08349 | 66.8867  |
| 2717.21           | 69.05489 | 66.88407 |
| 2717.692          | 69.02634 | 66.88169 |
| 2718.175          | 68.99783 | 66.87975 |
| 2718.656          | 68.96938 | 66.87815 |
| 2719.139          | 68.94096 | 66.87656 |
| 2719.621          | 68.91258 | 66.87481 |
| 2720.103          | 68.88419 | 66.87228 |
| 2720.585          | 68.85574 | 66.86836 |
| 2721.067          | 68.82726 | 66.86289 |
| 2721.549          | 68.79872 | 66.85604 |
| 2722.031          | 68.77005 | 66.84637 |
| 2722.513          | 68.7412  | 66.83315 |
| 2722.996          | 68.71203 | 66.81436 |
| 2723.478          | 68.68231 | 66.78657 |
| 2723.96           | 68.65229 | 66.75323 |
| 2724.442          | 68.62211 | 66.71637 |
| 2724.924          | 68.59182 | 66.67674 |
| 2725.406          | 68.56152 | 66.63578 |
| 2725.888          | 68.53123 | 66.59339 |
| 2726.37           | 68.50095 | 66.54971 |
| 2726.853          | 68.47069 | 66.5054  |
| 2727.335          | 68.44048 | 66.46119 |
| 2727.817          | 68.41039 | 66.41717 |
| 2728.299          | 68.38046 | 66.37363 |
| 2728.781          | 68.35069 | 66.3307  |
| 2729.263          | 68.32108 | 66.28823 |
| 2729.745          | 68.29176 | 66.24734 |
| 2730.227          | 68.26279 | 66.20863 |
| 2730.709          | 68.23434 | 66.1735  |
| 2731.192          | 68.2067  | 66.14428 |
| 2731.674          | 68.17957 | 66.11882 |
| 2732.156          | 68.1528  | 66.09583 |
| 2732.638          | 68.12633 | 66.07499 |
| 2733.12           | 68.10004 | 66.05552 |
| 2733.602          | 68.07393 | 66.03742 |
| 2734.084          | 68.04799 | 66.02065 |

| Wavenumber (cm-1) | After    | Before   |
|-------------------|----------|----------|
| 2734.566          | 68.02214 | 66.00462 |
| 2735.049          | 67.99628 | 65.98853 |
| 2735.531          | 67.97046 | 65.97295 |
| 2736.013          | 67.94469 | 65.9582  |
| 2736.495          | 67.91896 | 65.94427 |
| 2736.977          | 67.89329 | 65.93124 |
| 2737.459          | 67.86763 | 65.91912 |
| 2737.941          | 67.84196 | 65.90787 |
| 2738.423          | 67.81626 | 65.8977  |
| 2738.906          | 67.79051 | 65.88902 |
| 2739.388          | 67.76472 | 65.88125 |
| 2739.87           | 67.73885 | 65.87402 |
| 2740.352          | 67.71288 | 65.8671  |
| 2740.834          | 67.68681 | 65.86015 |
| 2741.316          | 67.66061 | 65.85319 |
| 2741.798          | 67.6343  | 65.84616 |
| 2742.28           | 67.60789 | 65.83907 |
| 2742.762          | 67.58144 | 65.83206 |
| 2743.245          | 67.55484 | 65.82462 |
| 2743.727          | 67.52802 | 65.81624 |
| 2744.209          | 67.50095 | 65.80688 |
| 2744.691          | 67.47363 | 65.79651 |
| 2745.173          | 67.44594 | 65.78439 |
| 2745.655          | 67.41783 | 65.77013 |
| 2746.137          | 67.38911 | 65.75262 |
| 2746.619          | 67.35949 | 65.72994 |
| 2747.102          | 67.32926 | 65.704   |
| 2747.583          | 67.29862 | 65.67591 |
| 2748.066          | 67.26765 | 65.64607 |
| 2748.548          | 67.23646 | 65.6153  |
| 2749.03           | 67.20508 | 65.5835  |
| 2749.512          | 67.1735  | 65.55076 |
| 2749.994          | 67.14178 | 65.51742 |
| 2750.476          | 67.11    | 65.48383 |
| 2750.958          | 67.07816 | 65.4501  |
| 2751.44           | 67.0463  | 65.41639 |
| 2751.923          | 67.01443 | 65.38278 |
| 2752.405          | 66.98256 | 65.34918 |
| 2752.887          | 66.95078 | 65.31622 |
| 2753.369          | 66.91916 | 65.28425 |
| 2753.851          | 66.88785 | 65.25412 |
| 2754.333          | 66.85709 | 65.22723 |
| 2754.815          | 66.82665 | 65.20223 |
| 2755.297          | 66.79642 | 65.17834 |
| 2755.78           | 66.76633 | 65.15532 |
| 2756.262          | 66.73631 | 65.13261 |
| 2756.744          | 66.7064  | 65.11031 |
| 2757.226          | 66.67654 | 65.08838 |
| 2757.708          | 66.6467  | 65.06662 |
| 2758.19           | 66.61678 | 65.04482 |
| 2758.672          | 66.58687 | 65.02293 |
| 2759.154          | 66.55697 | 65.00084 |
| 2759.636          | 66.52708 | 64.97852 |
| 2760.119          | 66.49723 | 64.9561  |
| 2760.601          | 66.46741 | 64.93309 |

| Wavenumber (cm-1) | After    | Before   |
|-------------------|----------|----------|
| 2761.083          | 66.43761 | 64.90929 |
| 2761.565          | 66.40786 | 64.88408 |
| 2762.047          | 66.37819 | 64.85643 |
| 2762.529          | 66.34856 | 64.8274  |
| 2763.011          | 66.31891 | 64.79763 |
| 2763.493          | 66.28924 | 64.76735 |
| 2763.976          | 66.2595  | 64.7371  |
| 2764.458          | 66.2297  | 64.70674 |
| 2764.94           | 66.19982 | 64.67631 |
| 2765.422          | 66.16988 | 64.64586 |
| 2765.904          | 66.13983 | 64.61533 |
| 2766.386          | 66.10968 | 64.58511 |
| 2766.868          | 66.07938 | 64.55562 |
| 2767.35           | 66.04893 | 64.52686 |
| 2767.833          | 66.01833 | 64.49875 |
| 2768.315          | 65.9875  | 64.47207 |
| 2768.797          | 65.95643 | 64.4472  |
| 2769.279          | 65.92505 | 64.42528 |
| 2769.761          | 65.89323 | 64.40828 |
| 2770.243          | 65.86109 | 64.39413 |
| 2770.725          | 65.82868 | 64.38162 |
| 2771.207          | 65.79605 | 64.37021 |
| 2771.689          | 65.76323 | 64.35893 |
| 2772.172          | 65.73019 | 64.34795 |
| 2772.654          | 65.69695 | 64.3372  |
| 2773.136          | 65.66351 | 64.32644 |
| 2773.618          | 65.62991 | 64.31566 |
| 2774.1            | 65.59613 | 64.3042  |
| 2774.582          | 65.56219 | 64.29145 |
| 2775.064          | 65.52809 | 64.27732 |
| 2775.546          | 65.49382 | 64.26193 |
| 2776.029          | 65.45943 | 64.24394 |
| 2776.51           | 65.42493 | 64.22273 |
| 2776.993          | 65.3904  | 64.19637 |
| 2777.475          | 65.35596 | 64.16168 |
| 2777.957          | 65.32145 | 64.12191 |
| 2778.439          | 65.28682 | 64.07901 |
| 2778.921          | 65.25204 | 64.03372 |
| 2779.403          | 65.21707 | 63.9875  |
| 2779.885          | 65.18189 | 63.94014 |
| 2780.367          | 65.1465  | 63.89178 |
| 2780.85           | 65.11086 | 63.84291 |
| 2781.332          | 65.07492 | 63.79392 |
| 2781.814          | 65.03871 | 63.7453  |
| 2782.296          | 65.00221 | 63.69765 |
| 2782.778          | 64.96542 | 63.6511  |
| 2783.26           | 64.92832 | 63.60546 |
| 2783.742          | 64.8909  | 63.56228 |
| 2784.224          | 64.85314 | 63.52231 |
| 2784.707          | 64.81502 | 63.48766 |
| 2785.189          | 64.77647 | 63.46187 |
| 2785.671          | 64.73754 | 63.44141 |
| 2786.153          | 64.69824 | 63.4242  |
| 2786.635          | 64.65854 | 63.40953 |
| 2787.117          | 64.61845 | 63.39592 |

| Wavenumber (cm-1) | After    | Before   |
|-------------------|----------|----------|
| 2787.599          | 64.57798 | 63.3835  |
| 2788.081          | 64.5371  | 63.37216 |
| 2788.563          | 64.49584 | 63.36122 |
| 2789.046          | 64.45424 | 63.35001 |
| 2789.528          | 64.41223 | 63.33843 |
| 2790.01           | 64.36977 | 63.32616 |
| 2790.492          | 64.32686 | 63.3131  |
| 2790.974          | 64.28349 | 63.29943 |
| 2791.456          | 64.23959 | 63.28398 |
| 2791.938          | 64.19514 | 63.26615 |
| 2792.42           | 64.15006 | 63.24448 |
| 2792.903          | 64.10419 | 63.21649 |
| 2793.385          | 64.05766 | 63.18453 |
| 2793.867          | 64.0106  | 63.14998 |
| 2794.349          | 63.96303 | 63.11327 |
| 2794.831          | 63.91502 | 63.07534 |
| 2795.313          | 63.86657 | 63.03608 |
| 2795.795          | 63.81769 | 62.99551 |
| 2796.277          | 63.76841 | 62.95408 |
| 2796.76           | 63.71878 | 62.91226 |
| 2797.242          | 63.66881 | 62.86999 |
| 2797.724          | 63.61847 | 62.82737 |
| 2798.206          | 63.56779 | 62.78443 |
| 2798.688          | 63.51677 | 62.741   |
| 2799.17           | 63.46543 | 62.69773 |
| 2799.652          | 63.4138  | 62.65493 |
| 2800.134          | 63.36191 | 62.61343 |
| 2800.616          | 63.30983 | 62.57456 |
| 2801.099          | 63.25751 | 62.53698 |
| 2801.581          | 63.20492 | 62.49991 |
| 2802.063          | 63.15208 | 62.46304 |
| 2802.545          | 63.09899 | 62.42581 |
| 2803.027          | 63.04562 | 62.38831 |
| 2803.509          | 62.99199 | 62.35051 |
| 2803.991          | 62.93808 | 62.31224 |
| 2804.473          | 62.88384 | 62.27337 |
| 2804.956          | 62.82934 | 62.2337  |
| 2805.438          | 62.77462 | 62.19296 |
| 2805.92           | 62.71967 | 62.15114 |
| 2806.402          | 62.66451 | 62.10833 |
| 2806.884          | 62.60918 | 62.06387 |
| 2807.366          | 62.55372 | 62.01747 |
| 2807.848          | 62.4982  | 61.96822 |
| 2808.33           | 62.44277 | 61.91458 |
| 2808.813          | 62.38728 | 61.85813 |
| 2809.294          | 62.33164 | 61.7998  |
| 2809.777          | 62.27581 | 61.73996 |
| 2810.259          | 62.21972 | 61.6793  |
| 2810.741          | 62.16338 | 61.61776 |
| 2811.223          | 62.10677 | 61.55538 |
| 2811.705          | 62.04988 | 61.49246 |
| 2812.187          | 61.99267 | 61.42919 |
| 2812.669          | 61.93514 | 61.3658  |
| 2813.151          | 61.87724 | 61.30253 |
| 2813.634          | 61.81897 | 61.23946 |



| Wavenumber (cm-1) | After    | Before   |
|-------------------|----------|----------|
| 2814.116          | 61.76034 | 61.17651 |
| 2814.598          | 61.70127 | 61.11437 |
| 2815.08           | 61.64174 | 61.05339 |
| 2815.562          | 61.58163 | 60.9945  |
| 2816.044          | 61.52081 | 60.93923 |
| 2816.526          | 61.45942 | 60.88609 |
| 2817.008          | 61.39753 | 60.83421 |
| 2817.49           | 61.33519 | 60.78326 |
| 2817.973          | 61.27246 | 60.7326  |
| 2818.455          | 61.20932 | 60.68235 |
| 2818.937          | 61.14578 | 60.6325  |
| 2819.419          | 61.08186 | 60.58286 |
| 2819.901          | 61.01757 | 60.53333 |
| 2820.383          | 60.95293 | 60.48366 |
| 2820.865          | 60.88795 | 60.43358 |
| 2821.347          | 60.82265 | 60.38307 |
| 2821.83           | 60.757   | 60.33227 |
| 2822.312          | 60.69107 | 60.28044 |
| 2822.794          | 60.62489 | 60.22724 |
| 2823.276          | 60.55855 | 60.17167 |
| 2823.758          | 60.4922  | 60.11198 |
| 2824.24           | 60.42568 | 60.04998 |
| 2824.722          | 60.35888 | 59.98675 |
| 2825.204          | 60.2918  | 59.92278 |
| 2825.687          | 60.22438 | 59.85901 |
| 2826.169          | 60.15658 | 59.79514 |
| 2826.651          | 60.08839 | 59.73118 |
| 2827.133          | 60.0197  | 59.6671  |
| 2827.615          | 59.95037 | 59.60248 |
| 2828.097          | 59.88052 | 59.53846 |
| 2828.579          | 59.81028 | 59.47597 |
| 2829.061          | 59.7396  | 59.41508 |
| 2829.543          | 59.6685  | 59.35559 |
| 2830.026          | 59.59707 | 59.29929 |
| 2830.508          | 59.52536 | 59.24703 |
| 2830.99           | 59.45359 | 59.20152 |
| 2831.472          | 59.38216 | 59.16741 |
| 2831.954          | 59.31058 | 59.13973 |
| 2832.436          | 59.23857 | 59.11552 |
| 2832.918          | 59.16598 | 59.09352 |
| 2833.4            | 59.09255 | 59.07137 |
| 2833.883          | 59.01833 | 59.04939 |
| 2834.365          | 58.94325 | 59.02731 |
| 2834.847          | 58.86728 | 59.00448 |
| 2835.329          | 58.79044 | 58.98061 |
| 2835.811          | 58.71247 | 58.95435 |
| 2836.293          | 58.63317 | 58.92436 |
| 2836.775          | 58.55251 | 58.89037 |
| 2837.257          | 58.47047 | 58.85261 |
| 2837.74           | 58.38667 | 58.80815 |
| 2838.221          | 58.3009  | 58.75552 |
| 2838.704          | 58.2126  | 58.6906  |
| 2839.186          | 58.12081 | 58.60649 |
| 2839.668          | 58.02647 | 58.51005 |
| 2840.15           | 57.93014 | 58.40535 |

| Wavenumber (cm-1) | After    | Before   |
|-------------------|----------|----------|
| 2840.632          | 57.83197 | 58.29379 |
| 2841.114          | 57.73224 | 58.17809 |
| 2841.596          | 57.63108 | 58.05821 |
| 2842.078          | 57.52856 | 57.93443 |
| 2842.561          | 57.42513 | 57.80837 |
| 2843.043          | 57.32143 | 57.68192 |
| 2843.525          | 57.21686 | 57.55455 |
| 2844.007          | 57.11105 | 57.42631 |
| 2844.489          | 57.00402 | 57.29743 |
| 2844.971          | 56.89584 | 57.16769 |
| 2845.453          | 56.78609 | 57.03847 |
| 2845.935          | 56.67462 | 56.91063 |
| 2846.417          | 56.56064 | 56.78563 |
| 2846.9            | 56.44275 | 56.66582 |
| 2847.382          | 56.32265 | 56.5494  |
| 2847.864          | 56.2014  | 56.43539 |
| 2848.346          | 56.07952 | 56.32373 |
| 2848.828          | 55.95792 | 56.21398 |
| 2849.31           | 55.83652 | 56.10622 |
| 2849.792          | 55.71548 | 56.00056 |
| 2850.274          | 55.59502 | 55.89645 |
| 2850.757          | 55.47511 | 55.79296 |
| 2851.239          | 55.35654 | 55.69134 |
| 2851.721          | 55.24006 | 55.59243 |
| 2852.203          | 55.12584 | 55.49642 |
| 2852.685          | 55.01384 | 55.40352 |
| 2853.167          | 54.90545 | 55.3145  |
| 2853.649          | 54.80133 | 55.22976 |
| 2854.131          | 54.70343 | 55.15069 |
| 2854.614          | 54.61495 | 55.07951 |
| 2855.096          | 54.53278 | 55.014   |
| 2855.578          | 54.45509 | 54.95283 |
| 2856.06           | 54.38128 | 54.89557 |
| 2856.542          | 54.31009 | 54.84136 |
| 2857.024          | 54.24163 | 54.79015 |
| 2857.506          | 54.17583 | 54.74184 |
| 2857.988          | 54.11203 | 54.69582 |
| 2858.47           | 54.04953 | 54.65133 |
| 2858.953          | 53.98844 | 54.60872 |
| 2859.435          | 53.92868 | 54.56815 |
| 2859.917          | 53.8702  | 54.52953 |
| 2860.399          | 53.81314 | 54.49291 |
| 2860.881          | 53.75676 | 54.45806 |
| 2861.363          | 53.70061 | 54.42481 |
| 2861.845          | 53.64382 | 54.39307 |
| 2862.327          | 53.58485 | 54.36275 |
| 2862.81           | 53.5251  | 54.33367 |
| 2863.292          | 53.46539 | 54.30569 |
| 2863.774          | 53.40595 | 54.2786  |
| 2864.256          | 53.34727 | 54.25211 |
| 2864.738          | 53.28933 | 54.22631 |
| 2865.22           | 53.23215 | 54.20113 |
| 2865.702          | 53.1761  | 54.17676 |
| 2866.184          | 53.12164 | 54.15371 |
| 2866.667          | 53.06845 | 54.13101 |

| Wavenumber (cm-1) | After    | Before   |
|-------------------|----------|----------|
| 2867.148          | 53.01636 | 54.10791 |
| 2867.631          | 52.96537 | 54.08431 |
| 2868.113          | 52.91541 | 54.0602  |
| 2868.595          | 52.86652 | 54.0345  |
| 2869.077          | 52.81876 | 54.00664 |
| 2869.559          | 52.77208 | 53.97493 |
| 2870.041          | 52.72636 | 53.93648 |
| 2870.523          | 52.68181 | 53.89426 |
| 2871.005          | 52.63853 | 53.85007 |
| 2871.488          | 52.59662 | 53.80459 |
| 2871.97           | 52.55623 | 53.75918 |
| 2872.452          | 52.51731 | 53.71368 |
| 2872.934          | 52.4799  | 53.66821 |
| 2873.416          | 52.44392 | 53.62322 |
| 2873.898          | 52.40924 | 53.57903 |
| 2874.38           | 52.37619 | 53.53618 |
| 2874.862          | 52.34503 | 53.49526 |
| 2875.344          | 52.31581 | 53.45641 |
| 2875.827          | 52.28851 | 53.41947 |
| 2876.309          | 52.26358 | 53.38589 |
| 2876.791          | 52.2412  | 53.35643 |
| 2877.273          | 52.22205 | 53.33311 |
| 2877.755          | 52.20724 | 53.31929 |
| 2878.237          | 52.19562 | 53.31165 |
| 2878.719          | 52.18647 | 53.30819 |
| 2879.201          | 52.17956 | 53.30825 |
| 2879.684          | 52.1744  | 53.31047 |
| 2880.166          | 52.17097 | 53.31494 |
| 2880.648          | 52.16919 | 53.32151 |
| 2881.13           | 52.16878 | 53.32946 |
| 2881.612          | 52.16935 | 53.33796 |
| 2882.094          | 52.17101 | 53.34715 |
| 2882.576          | 52.17373 | 53.35696 |
| 2883.058          | 52.17747 | 53.36728 |
| 2883.541          | 52.18222 | 53.37824 |
| 2884.023          | 52.18777 | 53.38905 |
| 2884.505          | 52.19396 | 53.39924 |
| 2884.987          | 52.20058 | 53.40792 |
| 2885.469          | 52.20732 | 53.41358 |
| 2885.951          | 52.21433 | 53.41751 |
| 2886.433          | 52.22168 | 53.42045 |
| 2886.915          | 52.22936 | 53.42255 |
| 2887.397          | 52.23737 | 53.42423 |
| 2887.88           | 52.24563 | 53.42545 |
| 2888.362          | 52.25409 | 53.42622 |
| 2888.844          | 52.26272 | 53.42689 |
| 2889.326          | 52.27154 | 53.428   |
| 2889.808          | 52.28042 | 53.42903 |
| 2890.29           | 52.2893  | 53.42964 |
| 2890.772          | 52.29809 | 53.42978 |
| 2891.254          | 52.30673 | 53.42937 |
| 2891.737          | 52.31516 | 53.42821 |
| 2892.219          | 52.32333 | 53.42622 |
| 2892.701          | 52.3312  | 53.42298 |
| 2893.183          | 52.33874 | 53.41776 |

| Wavenumber (cm-1) | After    | Before   |
|-------------------|----------|----------|
| 2893.665          | 52.34584 | 53.41135 |
| 2894.147          | 52.35244 | 53.40421 |
| 2894.629          | 52.35844 | 53.39655 |
| 2895.111          | 52.36373 | 53.38874 |
| 2895.594          | 52.36832 | 53.38073 |
| 2896.075          | 52.37215 | 53.37259 |
| 2896.558          | 52.37527 | 53.36442 |
| 2897.04           | 52.37782 | 53.35628 |
| 2897.522          | 52.37946 | 53.34838 |
| 2898.004          | 52.37994 | 53.34092 |
| 2898.486          | 52.3792  | 53.33396 |
| 2898.968          | 52.37722 | 53.32747 |
| 2899.45           | 52.37364 | 53.3219  |
| 2899.932          | 52.36825 | 53.31746 |
| 2900.415          | 52.36047 | 53.31481 |
| 2900.897          | 52.34939 | 53.31497 |
| 2901.379          | 52.33591 | 53.31691 |
| 2901.861          | 52.32059 | 53.32003 |
| 2902.343          | 52.30364 | 53.32421 |
| 2902.825          | 52.28547 | 53.32921 |
| 2903.307          | 52.266   | 53.33478 |
| 2903.789          | 52.24523 | 53.34081 |
| 2904.271          | 52.22327 | 53.34667 |
| 2904.754          | 52.20017 | 53.35132 |
| 2905.236          | 52.17611 | 53.35583 |
| 2905.718          | 52.15131 | 53.36092 |
| 2906.2            | 52.12579 | 53.36656 |
| 2906.682          | 52.09946 | 53.37262 |
| 2907.164          | 52.07284 | 53.38003 |
| 2907.646          | 52.04617 | 53.38914 |
| 2908.128          | 52.02015 | 53.4016  |
| 2908.611          | 51.99602 | 53.42032 |
| 2909.093          | 51.9725  | 53.4419  |
| 2909.575          | 51.94884 | 53.46428 |
| 2910.057          | 51.92467 | 53.48634 |
| 2910.539          | 51.89927 | 53.50603 |
| 2911.021          | 51.87293 | 53.52399 |
| 2911.503          | 51.84566 | 53.54009 |
| 2911.985          | 51.81764 | 53.55463 |
| 2912.468          | 51.78937 | 53.56891 |
| 2912.95           | 51.75976 | 53.5798  |
| 2913.432          | 51.72792 | 53.58468 |
| 2913.914          | 51.69379 | 53.58328 |
| 2914.396          | 51.65759 | 53.57596 |
| 2914.878          | 51.61767 | 53.55819 |
| 2915.36           | 51.57331 | 53.52786 |
| 2915.842          | 51.522   | 53.47806 |
| 2916.324          | 51.45943 | 53.39707 |
| 2916.807          | 51.39026 | 53.29725 |
| 2917.289          | 51.31731 | 53.18599 |
| 2917.771          | 51.24178 | 53.06631 |
| 2918.253          | 51.16583 | 52.9439  |
| 2918.735          | 51.0893  | 52.81812 |
| 2919.217          | 51.01247 | 52.68957 |
| 2919.699          | 50.93607 | 52.56012 |

| Wavenumber (cm-1) | After    | Before   |
|-------------------|----------|----------|
| 2920.181          | 50.8606  | 52.431   |
| 2920.664          | 50.78712 | 52.30477 |
| 2921.146          | 50.71674 | 52.1842  |
| 2921.628          | 50.64975 | 52.06995 |
| 2922.11           | 50.58601 | 51.96146 |
| 2922.592          | 50.52801 | 51.86517 |
| 2923.074          | 50.47706 | 51.78439 |
| 2923.556          | 50.4366  | 51.72803 |
| 2924.038          | 50.41234 | 51.71097 |
| 2924.521          | 50.39878 | 51.71861 |
| 2925.002          | 50.39267 | 51.7423  |
| 2925.485          | 50.39298 | 51.77905 |
| 2925.967          | 50.39747 | 51.82273 |
| 2926.449          | 50.40639 | 51.87409 |
| 2926.931          | 50.41962 | 51.93272 |
| 2927.413          | 50.43605 | 51.996   |
| 2927.895          | 50.45449 | 52.06134 |
| 2928.377          | 50.47513 | 52.12817 |
| 2928.859          | 50.49776 | 52.19513 |
| 2929.342          | 50.5223  | 52.26189 |
| 2929.824          | 50.54908 | 52.3293  |
| 2930.306          | 50.57665 | 52.39237 |
| 2930.788          | 50.60426 | 52.44851 |
| 2931.27           | 50.63017 | 52.49123 |
| 2931.752          | 50.65145 | 52.50963 |
| 2932.234          | 50.6709  | 52.51439 |
| 2932.716          | 50.69014 | 52.51184 |
| 2933.198          | 50.70975 | 52.50421 |
| 2933.681          | 50.73091 | 52.49609 |
| 2934.163          | 50.75336 | 52.48676 |
| 2934.645          | 50.77711 | 52.47645 |
| 2935.127          | 50.80252 | 52.46684 |
| 2935.609          | 50.82979 | 52.45931 |
| 2936.091          | 50.85932 | 52.45492 |
| 2936.573          | 50.89155 | 52.45509 |
| 2937.055          | 50.92649 | 52.46008 |
| 2937.538          | 50.96389 | 52.46911 |
| 2938.02           | 51.00504 | 52.48659 |
| 2938.502          | 51.05051 | 52.51468 |
| 2938.984          | 51.10213 | 52.5593  |
| 2939.466          | 51.16296 | 52.63052 |
| 2939.948          | 51.22974 | 52.71815 |
| 2940.43           | 51.30054 | 52.81611 |
| 2940.912          | 51.37456 | 52.92217 |
| 2941.395          | 51.45032 | 53.03191 |
| 2941.877          | 51.52795 | 53.14577 |
| 2942.359          | 51.60728 | 53.26334 |
| 2942.841          | 51.68779 | 53.38281 |
| 2943.323          | 51.7691  | 53.50252 |
| 2943.805          | 51.85059 | 53.62158 |
| 2944.287          | 51.9316  | 53.73862 |
| 2944.769          | 52.01196 | 53.85327 |
| 2945.251          | 52.0918  | 53.96603 |
| 2945.734          | 52.1695  | 54.07289 |
| 2946.216          | 52.24423 | 54.17177 |

| Wavenumber (cm-1) | After    | Before   |
|-------------------|----------|----------|
| 2946.698          | 52.31381 | 54.25739 |
| 2947.18           | 52.3746  | 54.32096 |
| 2947.662          | 52.43011 | 54.37097 |
| 2948.144          | 52.48244 | 54.41242 |
| 2948.626          | 52.53226 | 54.44693 |
| 2949.108          | 52.58101 | 54.47791 |
| 2949.591          | 52.62854 | 54.50504 |
| 2950.073          | 52.67495 | 54.52853 |
| 2950.555          | 52.72091 | 54.55015 |
| 2951.037          | 52.76721 | 54.57189 |
| 2951.519          | 52.81375 | 54.59329 |
| 2952.001          | 52.86068 | 54.61455 |
| 2952.483          | 52.90807 | 54.63582 |
| 2952.965          | 52.95572 | 54.65662 |
| 2953.448          | 53.00458 | 54.679   |
| 2953.929          | 53.05516 | 54.70405 |
| 2954.412          | 53.10862 | 54.73415 |
| 2954.894          | 53.16692 | 54.77325 |
| 2955.376          | 53.22819 | 54.81769 |
| 2955.858          | 53.29134 | 54.86531 |
| 2956.34           | 53.35603 | 54.91551 |
| 2956.822          | 53.42156 | 54.96683 |
| 2957.304          | 53.48795 | 55.0195  |
| 2957.786          | 53.55517 | 55.07349 |
| 2958.269          | 53.62278 | 55.12812 |
| 2958.751          | 53.69025 | 55.18256 |
| 2959.233          | 53.75782 | 55.23711 |
| 2959.715          | 53.82557 | 55.29174 |
| 2960.197          | 53.89347 | 55.34647 |
| 2960.679          | 53.96163 | 55.40159 |
| 2961.161          | 54.02975 | 55.45627 |
| 2961.643          | 54.09768 | 55.5101  |
| 2962.125          | 54.16516 | 55.56211 |
| 2962.608          | 54.23181 | 55.61063 |
| 2963.09           | 54.29792 | 55.65736 |
| 2963.572          | 54.36364 | 55.70329 |
| 2964.054          | 54.429   | 55.74885 |
| 2964.536          | 54.49409 | 55.7949  |
| 2965.018          | 54.55885 | 55.84117 |
| 2965.5            | 54.62326 | 55.88767 |
| 2965.982          | 54.68735 | 55.93442 |
| 2966.465          | 54.75118 | 55.98113 |
| 2966.947          | 54.81466 | 56.02866 |
| 2967.429          | 54.87773 | 56.07777 |
| 2967.911          | 54.94036 | 56.12853 |
| 2968.393          | 55.00249 | 56.1807  |
| 2968.875          | 55.06412 | 56.23581 |
| 2969.357          | 55.12524 | 56.29453 |
| 2969.839          | 55.18586 | 56.3591  |
| 2970.322          | 55.24599 | 56.43336 |
| 2970.804          | 55.30556 | 56.51322 |
| 2971.286          | 55.36448 | 56.5962  |
| 2971.768          | 55.42272 | 56.68124 |
| 2972.25           | 55.48016 | 56.76637 |
| 2972.732          | 55.53685 | 56.8519  |

| Wavenumber (cm-1) | After    | Before   |
|-------------------|----------|----------|
| 2973.214          | 55.59275 | 56.93765 |
| 2973.696          | 55.6479  | 57.02317 |
| 2974.178          | 55.7024  | 57.10844 |
| 2974.661          | 55.75603 | 57.19207 |
| 2975.143          | 55.80862 | 57.27275 |
| 2975.625          | 55.86012 | 57.35023 |
| 2976.107          | 55.91055 | 57.42476 |
| 2976.589          | 55.95964 | 57.49358 |
| 2977.071          | 56.00724 | 57.55534 |
| 2977.553          | 56.05296 | 57.60611 |
| 2978.035          | 56.0961  | 57.63924 |
| 2978.518          | 56.13736 | 57.66144 |
| 2979              | 56.17716 | 57.67672 |
| 2979.482          | 56.21569 | 57.68657 |
| 2979.964          | 56.25328 | 57.694   |
| 2980.446          | 56.28985 | 57.69857 |
| 2980.928          | 56.32541 | 57.70051 |
| 2981.41           | 56.36001 | 57.70082 |
| 2981.892          | 56.39357 | 57.70024 |
| 2982.375          | 56.4264  | 57.69981 |
| 2982.856          | 56.45876 | 57.70077 |
| 2983.339          | 56.49066 | 57.70336 |
| 2983.821          | 56.52203 | 57.70716 |
| 2984.303          | 56.55343 | 57.71536 |
| 2984.785          | 56.58509 | 57.72954 |
| 2985.267          | 56.61781 | 57.75407 |
| 2985.749          | 56.65294 | 57.79629 |
| 2986.231          | 56.68906 | 57.84885 |
| 2986.713          | 56.72531 | 57.90738 |
| 2987.196          | 56.76136 | 57.9703  |
| 2987.678          | 56.79651 | 58.03444 |
| 2988.16           | 56.83089 | 58.10017 |
| 2988.642          | 56.86442 | 58.16721 |
| 2989.124          | 56.89692 | 58.23425 |
| 2989.606          | 56.92833 | 58.30008 |
| 2990.088          | 56.95825 | 58.36416 |
| 2990.57           | 56.98631 | 58.42562 |
| 2991.052          | 57.01244 | 58.48423 |
| 2991.535          | 57.03672 | 58.54036 |
| 2992.017          | 57.05831 | 58.59125 |
| 2992.499          | 57.07679 | 58.63548 |
| 2992.981          | 57.09098 | 58.6694  |
| 2993.463          | 57.09889 | 58.68695 |
| 2993.945          | 57.10252 | 58.69403 |
| 2994.427          | 57.10305 | 58.69414 |
| 2994.909          | 57.1009  | 58.68837 |
| 2995.392          | 57.09686 | 58.67897 |
| 2995.874          | 57.09094 | 58.66592 |
| 2996.356          | 57.08323 | 58.64948 |
| 2996.838          | 57.07422 | 58.63118 |
| 2997.32           | 57.06448 | 58.61296 |
| 2997.802          | 57.05384 | 58.59382 |
| 2998.284          | 57.04232 | 58.57338 |
| 2998.766          | 57.02999 | 58.55176 |
| 2999.249          | 57.01679 | 58.5288  |

| Wavenumber (cm-1) | After    | Before   |
|-------------------|----------|----------|
| 2999.731          | 57.00312 | 58.50508 |
| 3000.213          | 56.98922 | 58.48103 |
| 3000.695          | 56.97549 | 58.45696 |
| 3001.177          | 56.96253 | 58.43324 |
| 3001.659          | 56.94992 | 58.41004 |
| 3002.141          | 56.93743 | 58.38752 |
| 3002.623          | 56.9251  | 58.36615 |
| 3003.105          | 56.91296 | 58.34662 |
| 3003.588          | 56.90088 | 58.32846 |
| 3004.07           | 56.88887 | 58.31175 |
| 3004.552          | 56.87661 | 58.29569 |
| 3005.034          | 56.86346 | 58.27851 |
| 3005.516          | 56.85029 | 58.26308 |
| 3005.998          | 56.83776 | 58.25159 |
| 3006.48           | 56.82591 | 58.24426 |
| 3006.962          | 56.81474 | 58.24093 |
| 3007.445          | 56.8051  | 58.24489 |
| 3007.927          | 56.79736 | 58.25758 |
| 3008.409          | 56.79295 | 58.24288 |
| 3008.891          | 56.79422 | 58.22819 |
| 3009.373          | 56.79863 | 58.21348 |
| 3009.855          | 56.8046  | 58.19878 |
| 3010.337          | 56.81148 | 58.18408 |
| 3010.819          | 56.81801 | 58.16938 |
| 3011.302          | 56.82437 | 58.15469 |
| 3011.783          | 56.83043 | 58.13999 |
| 3012.266          | 56.83588 | 58.12528 |
| 3012.748          | 56.84068 | 58.11059 |
| 3013.23           | 56.84398 | 58.09589 |
| 3013.712          | 56.84496 | 58.08118 |
| 3014.194          | 56.84348 | 58.06648 |
| 3014.676          | 56.83966 | 58.05178 |
| 3015.158          | 56.83183 | 58.03709 |
| 3015.64           | 56.81913 | 58.02238 |
| 3016.123          | 56.79917 | 58.00768 |
| 3016.605          | 56.76792 | 57.99299 |
| 3017.087          | 56.7294  | 57.97828 |
| 3017.569          | 56.68605 | 57.96359 |
| 3018.051          | 56.6387  | 57.94888 |
| 3018.533          | 56.58905 | 57.93417 |
| 3019.015          | 56.53698 | 57.91948 |
| 3019.497          | 56.48266 | 57.90478 |
| 3019.979          | 56.42688 | 57.89008 |
| 3020.462          | 56.37049 | 57.87539 |
| 3020.944          | 56.31358 | 57.86068 |
| 3021.426          | 56.25647 | 57.84598 |
| 3021.908          | 56.19928 | 57.83128 |
| 3022.39           | 56.14185 | 57.81658 |
| 3022.872          | 56.08545 | 57.80188 |
| 3023.354          | 56.03078 | 57.78718 |
| 3023.836          | 55.97941 | 57.77248 |
| 3024.319          | 55.93398 | 57.75778 |
| 3024.801          | 55.89206 | 57.74308 |
| 3025.283          | 55.85223 | 57.72838 |
| 3025.765          | 55.81408 | 57.69839 |



| Wavenumber (cm-1) | After    | Before   |
|-------------------|----------|----------|
| 3026.247          | 55.77667 | 57.6717  |
| 3026.729          | 55.74014 | 57.64869 |
| 3027.211          | 55.70443 | 57.62924 |
| 3027.693          | 55.66906 | 57.61159 |
| 3028.176          | 55.63338 | 57.59369 |
| 3028.658          | 55.59772 | 57.57636 |
| 3029.14           | 55.56215 | 57.55974 |
| 3029.622          | 55.52668 | 57.54382 |
| 3030.104          | 55.49149 | 57.52914 |
| 3030.586          | 55.45617 | 57.50806 |
| 3031.068          | 55.42051 | 57.48699 |
| 3031.55           | 55.38411 | 57.46591 |
| 3032.032          | 55.34627 | 57.44483 |
| 3032.515          | 55.30765 | 57.42375 |
| 3032.997          | 55.26863 | 57.40268 |
| 3033.479          | 55.22935 | 57.3816  |
| 3033.961          | 55.19008 | 57.36051 |
| 3034.443          | 55.15076 | 57.33943 |
| 3034.925          | 55.1114  | 57.31836 |
| 3035.407          | 55.07215 | 57.29728 |
| 3035.889          | 55.0331  | 57.2762  |
| 3036.372          | 54.99426 | 57.25512 |
| 3036.854          | 54.95566 | 57.23405 |
| 3037.336          | 54.9173  | 57.21296 |
| 3037.818          | 54.87914 | 57.19188 |
| 3038.3            | 54.84138 | 57.1708  |
| 3038.782          | 54.80411 | 57.14973 |
| 3039.264          | 54.76756 | 57.12865 |
| 3039.746          | 54.73217 | 57.10757 |
| 3040.229          | 54.69751 | 57.08649 |
| 3040.711          | 54.66332 | 57.06542 |
| 3041.193          | 54.62953 | 57.04434 |
| 3041.675          | 54.59596 | 57.02326 |
| 3042.157          | 54.56263 | 57.00218 |
| 3042.639          | 54.52949 | 56.9811  |
| 3043.121          | 54.49644 | 56.96002 |
| 3043.603          | 54.46335 | 56.93894 |
| 3044.085          | 54.43027 | 56.91786 |
| 3044.568          | 54.39721 | 56.89679 |
| 3045.05           | 54.36414 | 56.87571 |
| 3045.532          | 54.33108 | 56.85463 |
| 3046.014          | 54.29795 | 56.83355 |
| 3046.496          | 54.26471 | 56.81248 |
| 3046.978          | 54.23129 | 56.7914  |
| 3047.46           | 54.1976  | 56.77031 |
| 3047.942          | 54.16368 | 56.74923 |
| 3048.425          | 54.12957 | 56.72816 |
| 3048.906          | 54.09523 | 56.70708 |
| 3049.389          | 54.06064 | 56.686   |
| 3049.871          | 54.02584 | 56.66492 |
| 3050.353          | 53.99082 | 56.64385 |
| 3050.835          | 53.95568 | 56.62277 |
| 3051.317          | 53.92059 | 56.60169 |
| 3051.799          | 53.8853  | 56.58061 |
| 3052.281          | 53.8496  | 56.55953 |

| Wavenumber (cm-1) | After    | Before   |
|-------------------|----------|----------|
| 3052.763          | 53.8135  | 56.53845 |
| 3053.246          | 53.77699 | 56.51737 |
| 3053.728          | 53.7398  | 56.49629 |
| 3054.21           | 53.70182 | 56.47522 |
| 3054.692          | 53.66259 | 56.45414 |
| 3055.174          | 53.62135 | 56.43306 |
| 3055.656          | 53.57893 | 56.41198 |
| 3056.138          | 53.53583 | 56.39091 |
| 3056.62           | 53.49226 | 56.36983 |
| 3057.103          | 53.44858 | 56.34874 |
| 3057.585          | 53.40479 | 56.32766 |
| 3058.067          | 53.36094 | 56.30659 |
| 3058.549          | 53.31721 | 56.28552 |
| 3059.031          | 53.27374 | 56.26443 |
| 3059.513          | 53.23062 | 56.24335 |
| 3059.995          | 53.18801 | 56.22228 |
| 3060.477          | 53.14597 | 56.2012  |
| 3060.959          | 53.10447 | 56.18012 |
| 3061.442          | 53.06387 | 56.15904 |
| 3061.924          | 53.02436 | 56.13796 |
| 3062.406          | 52.9864  | 56.11688 |
| 3062.888          | 52.95073 | 56.0958  |
| 3063.37           | 52.9167  | 56.07472 |
| 3063.852          | 52.88388 | 56.05365 |
| 3064.334          | 52.85221 | 56.03257 |
| 3064.816          | 52.82146 | 56.01149 |
| 3065.299          | 52.79162 | 55.99041 |
| 3065.781          | 52.76266 | 55.96934 |
| 3066.263          | 52.73436 | 55.94825 |
| 3066.745          | 52.70637 | 55.92717 |
| 3067.227          | 52.67901 | 55.90609 |
| 3067.709          | 52.6525  | 55.88502 |
| 3068.191          | 52.62682 | 55.86394 |
| 3068.673          | 52.60202 | 55.84286 |
| 3069.156          | 52.57824 | 55.82179 |
| 3069.638          | 52.55554 | 55.80071 |
| 3070.12           | 52.53426 | 55.77963 |
| 3070.602          | 52.51497 | 55.75282 |
| 3071.084          | 52.49701 | 55.726   |
| 3071.566          | 52.47996 | 55.69919 |
| 3072.048          | 52.46362 | 55.67239 |
| 3072.53           | 52.44768 | 55.64558 |
| 3073.012          | 52.43213 | 55.61877 |
| 3073.495          | 52.41692 | 55.59196 |
| 3073.977          | 52.40194 | 55.56516 |
| 3074.459          | 52.38709 | 55.53834 |
| 3074.941          | 52.3722  | 55.51153 |
| 3075.423          | 52.35708 | 55.48472 |
| 3075.905          | 52.34166 | 55.45792 |
| 3076.387          | 52.32595 | 55.43111 |
| 3076.869          | 52.30956 | 55.4043  |
| 3077.352          | 52.29227 | 55.37749 |
| 3077.833          | 52.27358 | 55.35069 |
| 3078.316          | 52.25261 | 55.32388 |
| 3078.798          | 52.23016 | 55.29707 |

| Wavenumber (cm-1) | After    | Before   |
|-------------------|----------|----------|
| 3079.28           | 52.20669 | 55.27025 |
| 3079.762          | 52.18232 | 55.24345 |
| 3080.244          | 52.15735 | 55.21664 |
| 3080.726          | 52.13175 | 55.18983 |
| 3081.208          | 52.10553 | 55.16302 |
| 3081.69           | 52.0789  | 55.13622 |
| 3082.173          | 52.05209 | 55.10941 |
| 3082.655          | 52.02494 | 55.0826  |
| 3083.137          | 51.99737 | 55.05579 |
| 3083.619          | 51.96939 | 55.02898 |
| 3084.101          | 51.94093 | 55.00218 |
| 3084.583          | 51.91206 | 54.97536 |
| 3085.065          | 51.8828  | 54.94855 |
| 3085.547          | 51.85317 | 54.92175 |
| 3086.03           | 51.82317 | 54.89494 |
| 3086.512          | 51.79282 | 54.86813 |
| 3086.994          | 51.76215 | 54.84131 |
| 3087.476          | 51.73119 | 54.81452 |
| 3087.958          | 51.69996 | 54.78771 |
| 3088.44           | 51.66848 | 54.7609  |
| 3088.922          | 51.63676 | 54.73408 |
| 3089.404          | 51.60485 | 54.70728 |
| 3089.886          | 51.57276 | 54.68047 |
| 3090.369          | 51.54051 | 54.65366 |
| 3090.851          | 51.5081  | 54.62685 |
| 3091.333          | 51.47555 | 54.60005 |
| 3091.815          | 51.44288 | 54.57324 |
| 3092.297          | 51.4101  | 54.54642 |
| 3092.779          | 51.37721 | 54.51961 |
| 3093.261          | 51.34422 | 54.49281 |
| 3093.743          | 51.31109 | 54.466   |
| 3094.226          | 51.2779  | 54.43919 |
| 3094.708          | 51.2447  | 54.41238 |
| 3095.19           | 51.21152 | 54.38558 |
| 3095.672          | 51.17842 | 54.35877 |
| 3096.154          | 51.14539 | 54.33196 |
| 3096.636          | 51.11246 | 54.30514 |
| 3097.118          | 51.07962 | 54.27834 |
| 3097.6            | 51.04686 | 54.25153 |
| 3098.083          | 51.01428 | 54.22472 |
| 3098.565          | 50.98193 | 54.19791 |
| 3099.047          | 50.94986 | 54.17111 |
| 3099.529          | 50.91806 | 54.1443  |
| 3100.011          | 50.88666 | 54.11749 |
| 3100.493          | 50.8557  | 54.09068 |
| 3100.975          | 50.82537 | 54.06387 |
| 3101.457          | 50.79594 | 54.03706 |
| 3101.939          | 50.76717 | 54.01025 |
| 3102.422          | 50.73887 | 53.98344 |
| 3102.904          | 50.71103 | 53.95664 |
| 3103.386          | 50.68358 | 53.92983 |
| 3103.868          | 50.65646 | 53.90302 |
| 3104.35           | 50.62965 | 53.87621 |
| 3104.832          | 50.60298 | 53.8494  |
| 3105.314          | 50.57618 | 53.82259 |

| Wavenumber (cm-1) | After    | Before   |
|-------------------|----------|----------|
| 3105.796          | 50.54955 | 53.79578 |
| 3106.279          | 50.52327 | 53.76897 |
| 3106.76           | 50.49734 | 53.74217 |
| 3107.243          | 50.47173 | 53.71536 |
| 3107.725          | 50.4467  | 53.68855 |
| 3108.207          | 50.42234 | 53.66174 |
| 3108.689          | 50.39908 | 53.63494 |
| 3109.171          | 50.3777  | 53.60812 |
| 3109.653          | 50.35731 | 53.58132 |
| 3110.135          | 50.33736 | 53.5545  |
| 3110.617          | 50.31757 | 53.5277  |
| 3111.1            | 50.29746 | 53.50089 |
| 3111.582          | 50.27713 | 53.47408 |
| 3112.064          | 50.25652 | 53.44727 |
| 3112.546          | 50.23563 | 53.42047 |
| 3113.028          | 50.21462 | 53.39366 |
| 3113.51           | 50.1929  | 53.36685 |
| 3113.992          | 50.16996 | 53.34003 |
| 3114.474          | 50.14573 | 53.31323 |
| 3114.957          | 50.12027 | 53.28642 |
| 3115.439          | 50.09266 | 53.25961 |
| 3115.921          | 50.06245 | 53.2328  |
| 3116.403          | 50.02827 | 53.206   |
| 3116.885          | 49.98783 | 53.17918 |
| 3117.367          | 49.94349 | 53.15238 |
| 3117.849          | 49.89667 | 53.12557 |
| 3118.331          | 49.84793 | 53.09876 |
| 3118.813          | 49.79829 | 53.07195 |
| 3119.296          | 49.74768 | 53.04514 |
| 3119.778          | 49.69621 | 53.01833 |
| 3120.26           | 49.64431 | 52.99153 |
| 3120.742          | 49.59238 | 52.96472 |
| 3121.224          | 49.54065 | 52.93791 |
| 3121.706          | 49.48947 | 52.9111  |
| 3122.188          | 49.43893 | 52.8843  |
| 3122.67           | 49.38895 | 52.85748 |
| 3123.153          | 49.34046 | 52.83067 |
| 3123.635          | 49.29398 | 52.80386 |
| 3124.117          | 49.25075 | 52.77706 |
| 3124.599          | 49.21285 | 52.75025 |
| 3125.081          | 49.1783  | 52.72344 |
| 3125.563          | 49.14596 | 52.69663 |
| 3126.045          | 49.11548 | 52.66983 |
| 3126.527          | 49.08613 | 52.64301 |
| 3127.01           | 49.05792 | 52.6162  |
| 3127.492          | 49.03081 | 52.58939 |
| 3127.974          | 49.00428 | 52.56259 |
| 3128.456          | 48.97771 | 52.53578 |
| 3128.938          | 48.95146 | 52.50897 |
| 3129.42           | 48.9257  | 52.48216 |
| 3129.902          | 48.9004  | 52.45536 |
| 3130.384          | 48.87564 | 52.42854 |
| 3130.866          | 48.85127 | 52.40173 |
| 3131.349          | 48.82716 | 52.37492 |
| 3131.831          | 48.80324 | 52.34812 |

| Wavenumber (cm-1) | After    | Before   |
|-------------------|----------|----------|
| 3132.313          | 48.77946 | 52.32131 |
| 3132.795          | 48.75575 | 52.2945  |
| 3133.277          | 48.73203 | 52.26769 |
| 3133.759          | 48.7082  | 52.24089 |
| 3134.241          | 48.6841  | 52.21408 |
| 3134.723          | 48.65979 | 52.18726 |
| 3135.206          | 48.63525 | 52.16045 |
| 3135.688          | 48.61061 | 52.13365 |
| 3136.17           | 48.58619 | 52.10684 |
| 3136.652          | 48.56142 | 52.08003 |
| 3137.134          | 48.53584 | 52.05322 |
| 3137.616          | 48.50939 | 52.02642 |
| 3138.098          | 48.48209 | 51.99961 |
| 3138.58           | 48.45328 | 51.97279 |
| 3139.063          | 48.42264 | 51.94598 |
| 3139.544          | 48.38913 | 51.91919 |
| 3140.027          | 48.35101 | 51.89237 |
| 3140.509          | 48.31009 | 51.86556 |
| 3140.991          | 48.26748 | 51.83875 |
| 3141.473          | 48.22364 | 51.81195 |
| 3141.955          | 48.17943 | 51.78514 |
| 3142.437          | 48.13471 | 51.75833 |
| 3142.919          | 48.08955 | 51.73151 |
| 3143.401          | 48.04416 | 51.70472 |
| 3143.884          | 47.99859 | 51.6779  |
| 3144.366          | 47.95337 | 51.65109 |
| 3144.848          | 47.90903 | 51.62428 |
| 3145.33           | 47.86566 | 51.59748 |
| 3145.812          | 47.82314 | 51.57067 |
| 3146.294          | 47.7826  | 51.54386 |
| 3146.776          | 47.74461 | 51.51704 |
| 3147.258          | 47.71078 | 51.49025 |
| 3147.74           | 47.68386 | 51.46344 |
| 3148.223          | 47.66106 | 51.43662 |
| 3148.705          | 47.64073 | 51.40981 |
| 3149.187          | 47.62226 | 51.38302 |
| 3149.669          | 47.60439 | 51.3562  |
| 3150.151          | 47.58731 | 51.32939 |
| 3150.633          | 47.57091 | 51.30258 |
| 3151.115          | 47.55475 | 51.27578 |
| 3151.597          | 47.53851 | 51.24897 |
| 3152.08           | 47.52179 | 51.22215 |
| 3152.562          | 47.50409 | 51.19534 |
| 3153.044          | 47.48531 | 51.16855 |
| 3153.526          | 47.4656  | 51.14173 |
| 3154.008          | 47.44368 | 51.11492 |
| 3154.49           | 47.4189  | 51.08811 |
| 3154.972          | 47.38952 | 51.06131 |
| 3155.454          | 47.35258 | 51.0345  |
| 3155.937          | 47.31101 | 51.00769 |
| 3156.419          | 47.26656 | 50.98087 |
| 3156.901          | 47.21983 | 50.95408 |
| 3157.383          | 47.17207 | 50.92726 |
| 3157.865          | 47.12314 | 50.90045 |
| 3158.347          | 47.07315 | 50.87364 |

| Wavenumber (cm-1) | After    | Before   |
|-------------------|----------|----------|
| 3158.829          | 47.02266 | 50.84684 |
| 3159.311          | 46.97222 | 50.82003 |
| 3159.793          | 46.92194 | 50.79322 |
| 3160.276          | 46.87207 | 50.7664  |
| 3160.758          | 46.82272 | 50.73961 |
| 3161.24           | 46.77373 | 50.71279 |
| 3161.722          | 46.72607 | 50.68598 |
| 3162.204          | 46.68027 | 50.65917 |
| 3162.686          | 46.63758 | 50.63237 |
| 3163.168          | 46.60007 | 50.60556 |
| 3163.65           | 46.56577 | 50.57875 |
| 3164.133          | 46.53349 | 50.55194 |
| 3164.615          | 46.50287 | 50.52514 |
| 3165.097          | 46.47312 | 50.49833 |
| 3165.579          | 46.44432 | 50.47151 |
| 3166.061          | 46.41642 | 50.4447  |
| 3166.543          | 46.38898 | 50.4179  |
| 3167.025          | 46.3615  | 50.39109 |
| 3167.507          | 46.33415 | 50.36428 |
| 3167.99           | 46.30695 | 50.33746 |
| 3168.471          | 46.27988 | 50.31067 |
| 3168.954          | 46.25305 | 50.28386 |
| 3169.436          | 46.22606 | 50.25705 |
| 3169.918          | 46.1987  | 50.23023 |
| 3170.4            | 46.17054 | 50.20343 |
| 3170.882          | 46.14088 | 50.17662 |
| 3171.364          | 46.11036 | 50.14981 |
| 3171.846          | 46.07933 | 50.123   |
| 3172.328          | 46.04787 | 50.0962  |
| 3172.811          | 46.0162  | 50.06939 |
| 3173.293          | 45.98431 | 50.04257 |
| 3173.775          | 45.95218 | 50.01576 |
| 3174.257          | 45.91999 | 49.98896 |
| 3174.739          | 45.88795 | 49.96216 |
| 3175.221          | 45.85587 | 49.93535 |
| 3175.703          | 45.82366 | 49.90853 |
| 3176.185          | 45.79131 | 49.88173 |
| 3176.667          | 45.75876 | 49.85492 |
| 3177.15           | 45.72601 | 49.82811 |
| 3177.632          | 45.69305 | 49.8013  |
| 3178.114          | 45.65982 | 49.7745  |
| 3178.596          | 45.62618 | 49.74769 |
| 3179.078          | 45.59229 | 49.72087 |
| 3179.56           | 45.55823 | 49.69406 |
| 3180.042          | 45.52405 | 49.66726 |
| 3180.524          | 45.48983 | 49.64045 |
| 3181.007          | 45.45557 | 49.61364 |
| 3181.489          | 45.42126 | 49.58683 |
| 3181.971          | 45.38691 | 49.56003 |
| 3182.453          | 45.3525  | 49.53322 |
| 3182.935          | 45.31812 | 49.50641 |
| 3183.417          | 45.28386 | 49.47959 |
| 3183.899          | 45.24973 | 49.45279 |
| 3184.381          | 45.21573 | 49.42598 |
| 3184.864          | 45.182   | 49.39917 |

| Wavenumber (cm-1) | After    | Before   |
|-------------------|----------|----------|
| 3185.346          | 45.14862 | 49.37235 |
| 3185.828          | 45.11583 | 49.34556 |
| 3186.31           | 45.084   | 49.31875 |
| 3186.792          | 45.05273 | 49.29194 |
| 3187.274          | 45.02181 | 49.26514 |
| 3187.756          | 44.99113 | 49.23974 |
| 3188.238          | 44.96052 | 49.21434 |
| 3188.72           | 44.93    | 49.18895 |
| 3189.203          | 44.89956 | 49.16355 |
| 3189.685          | 44.86914 | 49.13815 |
| 3190.167          | 44.83868 | 49.11276 |
| 3190.649          | 44.80813 | 49.08736 |
| 3191.131          | 44.77742 | 49.06196 |
| 3191.613          | 44.74653 | 49.03656 |
| 3192.095          | 44.71548 | 49.01116 |
| 3192.577          | 44.68409 | 48.98578 |
| 3193.06           | 44.65226 | 48.96038 |
| 3193.542          | 44.61974 | 48.93498 |
| 3194.024          | 44.58612 | 48.90959 |
| 3194.506          | 44.55181 | 48.88419 |
| 3194.988          | 44.51705 | 48.85879 |
| 3195.47           | 44.48193 | 48.83339 |
| 3195.952          | 44.44659 | 48.80799 |
| 3196.434          | 44.41107 | 48.7826  |
| 3196.917          | 44.37537 | 48.7572  |
| 3197.398          | 44.3396  | 48.7318  |
| 3197.881          | 44.30392 | 48.70641 |
| 3198.363          | 44.26826 | 48.68102 |
| 3198.845          | 44.23258 | 48.65561 |
| 3199.327          | 44.19688 | 48.63021 |
| 3199.809          | 44.16117 | 48.60481 |
| 3200.291          | 44.12547 | 48.57943 |
| 3200.773          | 44.0898  | 48.55402 |
| 3201.255          | 44.05418 | 48.52863 |
| 3201.738          | 44.01856 | 48.50324 |
| 3202.22           | 43.98303 | 48.47784 |
| 3202.702          | 43.94764 | 48.45244 |
| 3203.184          | 43.91243 | 48.42704 |
| 3203.666          | 43.87749 | 48.40164 |
| 3204.148          | 43.84279 | 48.37625 |
| 3204.63           | 43.80834 | 48.35085 |
| 3205.112          | 43.77409 | 48.32545 |
| 3205.594          | 43.73991 | 48.30007 |
| 3206.077          | 43.70605 | 48.27467 |
| 3206.559          | 43.67268 | 48.24927 |
| 3207.041          | 43.63982 | 48.22386 |
| 3207.523          | 43.60746 | 48.19846 |
| 3208.005          | 43.57588 | 48.17307 |
| 3208.487          | 43.54521 | 48.14768 |
| 3208.969          | 43.51588 | 48.12228 |
| 3209.451          | 43.48861 | 48.09689 |
| 3209.934          | 43.46264 | 48.07149 |
| 3210.416          | 43.44061 | 48.04609 |
| 3210.898          | 43.41859 | 48.02069 |
| 3211.38           | 43.39656 | 47.99529 |

| Wavenumber (cm-1) | After    | Before   |
|-------------------|----------|----------|
| 3211.862          | 43.37453 | 47.9699  |
| 3212.344          | 43.35251 | 47.9445  |
| 3212.826          | 43.33049 | 47.9191  |
| 3213.308          | 43.30846 | 47.89372 |
| 3213.791          | 43.28643 | 47.86832 |
| 3214.273          | 43.2644  | 47.84292 |
| 3214.755          | 43.24237 | 47.81751 |
| 3215.237          | 43.22036 | 47.79212 |
| 3215.719          | 43.19833 | 47.76672 |
| 3216.201          | 43.1763  | 47.74133 |
| 3216.683          | 43.15428 | 47.71593 |
| 3217.165          | 43.13225 | 47.69054 |
| 3217.647          | 43.11022 | 47.66514 |
| 3218.13           | 43.08819 | 47.63974 |
| 3218.612          | 43.06616 | 47.61434 |
| 3219.094          | 43.04414 | 47.58894 |
| 3219.576          | 43.02211 | 47.56355 |
| 3220.058          | 43.00008 | 47.53816 |
| 3220.54           | 42.97807 | 47.51275 |
| 3221.022          | 42.95604 | 47.48737 |
| 3221.504          | 42.93401 | 47.46197 |
| 3221.987          | 42.91198 | 47.43657 |
| 3222.469          | 42.88995 | 47.41869 |
| 3222.951          | 42.86793 | 47.40081 |
| 3223.433          | 42.8459  | 47.38294 |
| 3223.915          | 42.82387 | 47.36508 |
| 3224.397          | 42.80186 | 47.3472  |
| 3224.879          | 42.77983 | 47.32932 |
| 3225.361          | 42.7578  | 47.31145 |
| 3225.844          | 42.73577 | 47.29358 |
| 3226.325          | 42.71374 | 47.2757  |
| 3226.808          | 42.69172 | 47.25783 |
| 3227.29           | 42.66969 | 47.23995 |
| 3227.772          | 42.64766 | 47.22208 |
| 3228.254          | 42.62564 | 47.20421 |
| 3228.736          | 42.60361 | 47.18633 |
| 3229.218          | 42.58158 | 47.16846 |
| 3229.7            | 42.55956 | 47.15059 |
| 3230.182          | 42.53753 | 47.13271 |
| 3230.665          | 42.51551 | 47.11484 |
| 3231.147          | 42.49348 | 47.09696 |
| 3231.629          | 42.47145 | 47.0791  |
| 3232.111          | 42.44943 | 47.06123 |
| 3232.593          | 42.4274  | 47.04335 |
| 3233.075          | 42.40537 | 47.02547 |
| 3233.557          | 42.38335 | 47.00761 |
| 3234.039          | 42.36131 | 46.98973 |
| 3234.521          | 42.33929 | 46.97186 |
| 3235.004          | 42.31727 | 46.95398 |
| 3235.486          | 42.29524 | 46.93611 |
| 3235.968          | 42.27322 | 46.91824 |
| 3236.45           | 42.25119 | 46.90036 |
| 3236.932          | 42.22916 | 46.88249 |
| 3237.414          | 42.20713 | 46.86462 |
| 3237.896          | 42.1851  | 46.84674 |



| Wavenumber (cm-1) | After    | Before   |
|-------------------|----------|----------|
| 3238.378          | 42.16309 | 46.82887 |
| 3238.861          | 42.14106 | 46.811   |
| 3239.343          | 42.11903 | 46.79313 |
| 3239.825          | 42.09701 | 46.77525 |
| 3240.307          | 42.07498 | 46.75737 |
| 3240.789          | 42.05295 | 46.73951 |
| 3241.271          | 42.03092 | 46.72163 |
| 3241.753          | 42.0089  | 46.70376 |
| 3242.235          | 41.98688 | 46.68588 |
| 3242.718          | 41.96484 | 46.66802 |
| 3243.2            | 41.94282 | 46.65014 |
| 3243.682          | 41.9208  | 46.63226 |
| 3244.164          | 41.89877 | 46.61439 |
| 3244.646          | 41.87674 | 46.59652 |
| 3245.128          | 41.85471 | 46.57864 |
| 3245.61           | 41.83268 | 46.56077 |
| 3246.092          | 41.81066 | 46.54289 |
| 3246.574          | 41.78864 | 46.52503 |
| 3247.057          | 41.76661 | 46.50715 |
| 3247.539          | 41.74459 | 46.48928 |
| 3248.021          | 41.72256 | 46.4714  |
| 3248.503          | 41.70053 | 46.45353 |
| 3248.985          | 41.6785  | 46.43566 |
| 3249.467          | 41.65647 | 46.41778 |
| 3249.949          | 41.63445 | 46.3999  |
| 3250.431          | 41.61242 | 46.38204 |
| 3250.914          | 41.59039 | 46.36416 |
| 3251.396          | 41.56837 | 46.34629 |
| 3251.878          | 41.54635 | 46.32841 |
| 3252.36           | 41.52432 | 46.31055 |
| 3252.842          | 41.50229 | 46.29267 |
| 3253.324          | 41.48026 | 46.2748  |
| 3253.806          | 41.45824 | 46.25692 |
| 3254.288          | 41.43621 | 46.23906 |
| 3254.771          | 41.41418 | 46.22118 |
| 3255.252          | 41.39217 | 46.2033  |
| 3255.735          | 41.37013 | 46.18543 |
| 3256.217          | 41.3481  | 46.16756 |
| 3256.699          | 41.32608 | 46.14968 |
| 3257.181          | 41.30405 | 46.13181 |
| 3257.663          | 41.28203 | 46.11393 |
| 3258.145          | 41.26    | 46.09606 |
| 3258.627          | 41.23797 | 46.07819 |
| 3259.109          | 41.21595 | 46.06032 |
| 3259.592          | 41.19392 | 46.04244 |
| 3260.074          | 41.1719  | 46.02458 |
| 3260.556          | 41.14986 | 46.0067  |
| 3261.038          | 41.12784 | 45.98882 |
| 3261.52           | 41.10582 | 45.97095 |
| 3262.002          | 41.08379 | 45.95308 |
| 3262.484          | 41.06176 | 45.9352  |
| 3262.966          | 41.03974 | 45.91732 |
| 3263.448          | 41.01771 | 45.89945 |
| 3263.931          | 40.99568 | 45.88159 |
| 3264.413          | 40.97366 | 45.86371 |

| Wavenumber (cm-1) | After    | Before   |
|-------------------|----------|----------|
| 3264.895          | 40.95162 | 45.84583 |
| 3265.377          | 40.92961 | 45.82796 |
| 3265.859          | 40.90758 | 45.81009 |
| 3266.341          | 40.88555 | 45.79221 |
| 3266.823          | 40.86353 | 45.77434 |
| 3267.305          | 40.8415  | 45.75647 |
| 3267.788          | 40.81947 | 45.7386  |
| 3268.27           | 40.79744 | 45.72072 |
| 3268.752          | 40.77541 | 45.70285 |
| 3269.234          | 40.7534  | 45.68498 |
| 3269.716          | 40.73137 | 45.6671  |
| 3270.198          | 40.7186  | 45.64923 |
| 3270.68           | 40.70584 | 45.63136 |
| 3271.162          | 40.69307 | 45.61349 |
| 3271.645          | 40.68031 | 45.59561 |
| 3272.127          | 40.66754 | 45.57774 |
| 3272.609          | 40.65478 | 45.56587 |
| 3273.091          | 40.64201 | 45.554   |
| 3273.573          | 40.62925 | 45.54213 |
| 3274.055          | 40.61648 | 45.53026 |
| 3274.537          | 40.60372 | 45.51839 |
| 3275.019          | 40.59095 | 45.50652 |
| 3275.501          | 40.57819 | 45.49465 |
| 3275.984          | 40.56542 | 45.48278 |
| 3276.466          | 40.55266 | 45.47092 |
| 3276.948          | 40.53989 | 45.45905 |
| 3277.43           | 40.52713 | 45.44717 |
| 3277.912          | 40.51436 | 45.4353  |
| 3278.394          | 40.5016  | 45.42344 |
| 3278.876          | 40.48883 | 45.41157 |
| 3279.358          | 40.47607 | 45.3997  |
| 3279.841          | 40.4633  | 45.38783 |
| 3280.323          | 40.45054 | 45.37596 |
| 3280.805          | 40.43777 | 45.36409 |
| 3281.287          | 40.42501 | 45.35222 |
| 3281.769          | 40.41224 | 45.34035 |
| 3282.251          | 40.39948 | 45.32848 |
| 3282.733          | 40.38672 | 45.31661 |
| 3283.215          | 40.37395 | 45.30474 |
| 3283.698          | 40.36118 | 45.29287 |
| 3284.179          | 40.34842 | 45.28101 |
| 3284.662          | 40.33566 | 45.26914 |
| 3285.144          | 40.32289 | 45.25727 |
| 3285.626          | 40.31012 | 45.2454  |
| 3286.108          | 40.29736 | 45.23353 |
| 3286.59           | 40.2846  | 45.22166 |
| 3287.072          | 40.27183 | 45.20979 |
| 3287.554          | 40.25906 | 45.19792 |
| 3288.036          | 40.2463  | 45.18606 |
| 3288.519          | 40.23354 | 45.17419 |
| 3289.001          | 40.22077 | 45.16231 |
| 3289.483          | 40.208   | 45.15044 |
| 3289.965          | 40.19524 | 45.13858 |
| 3290.447          | 40.18248 | 45.12671 |
| 3290.929          | 40.16971 | 45.11484 |

| Wavenumber (cm-1) | After    | Before   |
|-------------------|----------|----------|
| 3291.411          | 40.15694 | 45.10297 |
| 3291.893          | 40.14419 | 45.0911  |
| 3292.375          | 40.13142 | 45.07923 |
| 3292.858          | 40.11865 | 45.06736 |
| 3293.34           | 40.10589 | 45.05549 |
| 3293.822          | 40.09313 | 45.04363 |
| 3294.304          | 40.08036 | 45.03175 |
| 3294.786          | 40.0676  | 45.01988 |
| 3295.268          | 40.05483 | 45.00801 |
| 3295.75           | 40.04207 | 44.99615 |
| 3296.232          | 40.0293  | 44.98428 |
| 3296.715          | 40.01654 | 44.97241 |
| 3297.197          | 40.00377 | 44.96053 |
| 3297.679          | 39.99101 | 44.94867 |
| 3298.161          | 39.97824 | 44.9368  |
| 3298.643          | 39.96548 | 44.92493 |
| 3299.125          | 39.95271 | 44.91306 |
| 3299.607          | 39.93995 | 44.90119 |
| 3300.089          | 39.92719 | 44.88932 |
| 3300.572          | 39.91442 | 44.87745 |
| 3301.054          | 39.90165 | 44.86558 |
| 3301.536          | 39.88889 | 44.85372 |
| 3302.018          | 39.87612 | 44.84185 |
| 3302.5            | 39.86336 | 44.82998 |
| 3302.982          | 39.85059 | 44.8181  |
| 3303.464          | 39.83783 | 44.80624 |
| 3303.946          | 39.82507 | 44.79437 |
| 3304.428          | 39.8123  | 44.7825  |
| 3304.911          | 39.79953 | 44.77063 |
| 3305.393          | 39.78677 | 44.75877 |
| 3305.875          | 39.77401 | 44.7469  |
| 3306.357          | 39.76124 | 44.73502 |
| 3306.839          | 39.74847 | 44.72315 |
| 3307.321          | 39.73571 | 44.71129 |
| 3307.803          | 39.72295 | 44.69942 |
| 3308.285          | 39.71018 | 44.68755 |
| 3308.768          | 39.69741 | 44.67568 |
| 3309.25           | 39.68465 | 44.66381 |
| 3309.732          | 39.67189 | 44.65194 |
| 3310.214          | 39.65912 | 44.64007 |
| 3310.696          | 39.64635 | 44.6282  |
| 3311.178          | 39.63359 | 44.61633 |
| 3311.66           | 39.62083 | 44.60446 |
| 3312.142          | 39.60806 | 44.59259 |
| 3312.625          | 39.5953  | 44.58072 |
| 3313.106          | 39.58253 | 44.56886 |
| 3313.589          | 39.56977 | 44.55698 |
| 3314.071          | 39.557   | 44.54511 |
| 3314.553          | 39.54424 | 44.53324 |
| 3315.035          | 39.53148 | 44.52138 |
| 3315.517          | 39.51871 | 44.50951 |
| 3315.999          | 39.50594 | 44.49764 |
| 3316.481          | 39.49318 | 44.48577 |
| 3316.963          | 39.48042 | 44.4739  |
| 3317.446          | 39.46765 | 44.46203 |

| Wavenumber (cm-1) | After    | Before   |
|-------------------|----------|----------|
| 3317.928          | 39.45488 | 44.45016 |
| 3318.41           | 39.44212 | 44.4383  |
| 3318.892          | 39.42936 | 44.42642 |
| 3319.374          | 39.41659 | 44.41456 |
| 3319.856          | 39.40382 | 44.40269 |
| 3320.338          | 39.39106 | 44.39082 |
| 3320.82           | 39.3783  | 44.37895 |
| 3321.302          | 39.36553 | 44.36708 |
| 3321.785          | 39.35277 | 44.35521 |
| 3322.267          | 39.34    | 44.34334 |
| 3322.749          | 39.32724 | 44.33148 |
| 3323.231          | 39.31447 | 44.3196  |
| 3323.713          | 39.30171 | 44.30773 |
| 3324.195          | 39.28894 | 44.29587 |
| 3324.677          | 39.27618 | 44.284   |
| 3325.159          | 39.26341 | 44.27213 |
| 3325.642          | 39.25065 | 44.26025 |
| 3326.124          | 39.23788 | 44.24839 |
| 3326.606          | 39.22512 | 44.23652 |
| 3327.088          | 39.21236 | 44.22465 |
| 3327.57           | 39.19958 | 44.21278 |
| 3328.052          | 39.18682 | 44.20091 |
| 3328.534          | 39.17406 | 44.18904 |
| 3329.016          | 39.16129 | 44.17717 |
| 3329.499          | 39.14853 | 44.1653  |
| 3329.981          | 39.13576 | 44.15344 |
| 3330.463          | 39.123   | 44.14156 |
| 3330.945          | 39.11023 | 44.12969 |
| 3331.427          | 39.09747 | 44.11782 |
| 3331.909          | 39.08471 | 44.10596 |
| 3332.391          | 39.07195 | 44.09409 |
| 3332.873          | 39.05918 | 44.08222 |
| 3333.355          | 39.04641 | 44.07035 |
| 3333.838          | 39.03365 | 44.05848 |
| 3334.32           | 39.02089 | 44.04661 |
| 3334.802          | 39.00812 | 44.03474 |
| 3335.284          | 38.99535 | 44.02287 |
| 3335.766          | 38.98258 | 44.011   |
| 3336.248          | 38.96983 | 43.99913 |
| 3336.73           | 38.95706 | 43.98726 |
| 3337.212          | 38.94429 | 43.97539 |
| 3337.695          | 38.93153 | 43.96353 |
| 3338.177          | 38.91877 | 43.95166 |
| 3338.659          | 38.906   | 43.93979 |
| 3339.141          | 38.89323 | 43.92792 |
| 3339.623          | 38.88047 | 43.91605 |
| 3340.105          | 38.86771 | 43.90418 |
| 3340.587          | 38.85494 | 43.89231 |
| 3341.069          | 38.84217 | 43.88044 |
| 3341.552          | 38.82941 | 43.86858 |
| 3342.033          | 38.81665 | 43.85671 |
| 3342.516          | 38.80388 | 43.84484 |
| 3342.998          | 38.79111 | 43.83297 |
| 3343.48           | 38.77835 | 43.82110 |
| 3343.962          | 38.76559 | 43.80923 |

| Wavenumber (cm-1) | After    | Before   |
|-------------------|----------|----------|
| 3344.444          | 38.75282 | 43.822   |
| 3344.926          | 38.74006 | 43.81506 |
| 3345.408          | 38.72729 | 43.80812 |
| 3345.89           | 38.71453 | 43.80118 |
| 3346.373          | 38.70176 | 43.79424 |
| 3346.855          | 38.689   | 43.7873  |
| 3347.337          | 38.67623 | 43.78036 |
| 3347.819          | 38.66347 | 43.77342 |
| 3348.301          | 38.6507  | 43.76647 |
| 3348.783          | 38.63794 | 43.75953 |
| 3349.265          | 38.62517 | 43.75259 |
| 3349.747          | 38.61744 | 43.74565 |
| 3350.229          | 38.60972 | 43.73871 |
| 3350.712          | 38.602   | 43.73177 |
| 3351.194          | 38.59428 | 43.72483 |
| 3351.676          | 38.58655 | 43.71788 |
| 3352.158          | 38.57882 | 43.71095 |
| 3352.64           | 38.5711  | 43.704   |
| 3353.122          | 38.56337 | 43.69706 |
| 3353.604          | 38.55565 | 43.69012 |
| 3354.086          | 38.54792 | 43.68318 |
| 3354.569          | 38.5402  | 43.67624 |
| 3355.051          | 38.53248 | 43.6693  |
| 3355.533          | 38.52475 | 43.66236 |
| 3356.015          | 38.51702 | 43.65542 |
| 3356.497          | 38.5093  | 43.64848 |
| 3356.979          | 38.50158 | 43.64154 |
| 3357.461          | 38.49385 | 43.63459 |
| 3357.943          | 38.48613 | 43.62765 |
| 3358.426          | 38.4784  | 43.62071 |
| 3358.908          | 38.47068 | 43.61377 |
| 3359.39           | 38.46295 | 43.60683 |
| 3359.872          | 38.45523 | 43.59989 |
| 3360.354          | 38.4475  | 43.59295 |
| 3360.836          | 38.43978 | 43.58601 |
| 3361.318          | 38.43206 | 43.57907 |
| 3361.8            | 38.42433 | 43.57213 |
| 3362.282          | 38.4166  | 43.56519 |
| 3362.765          | 38.40888 | 43.55824 |
| 3363.247          | 38.40115 | 43.5513  |
| 3363.729          | 38.39343 | 43.54436 |
| 3364.211          | 38.3857  | 43.53742 |
| 3364.693          | 38.37798 | 43.53048 |
| 3365.175          | 38.37026 | 43.52354 |
| 3365.657          | 38.36253 | 43.5166  |
| 3366.139          | 38.3548  | 43.50966 |
| 3366.622          | 38.34708 | 43.50272 |
| 3367.104          | 38.33936 | 43.49577 |
| 3367.586          | 38.33163 | 43.48883 |
| 3368.068          | 38.32391 | 43.48189 |
| 3368.55           | 38.31618 | 43.47495 |
| 3369.032          | 38.30846 | 43.46801 |
| 3369.514          | 38.30074 | 43.46994 |
| 3369.996          | 38.29301 | 43.47187 |
| 3370.479          | 38.28529 | 43.4738  |

| Wavenumber (cm-1) | After    | Before   |
|-------------------|----------|----------|
| 3370.961          | 38.27756 | 43.47573 |
| 3371.443          | 38.26984 | 43.47766 |
| 3371.925          | 38.26211 | 43.47959 |
| 3372.407          | 38.25438 | 43.48151 |
| 3372.889          | 38.24666 | 43.48345 |
| 3373.371          | 38.23894 | 43.48538 |
| 3373.853          | 38.23121 | 43.48731 |
| 3374.335          | 38.22349 | 43.48924 |
| 3374.818          | 38.21577 | 43.49117 |
| 3375.3            | 38.20804 | 43.4931  |
| 3375.782          | 38.20031 | 43.49503 |
| 3376.264          | 38.19259 | 43.49696 |
| 3376.746          | 38.18486 | 43.49889 |
| 3377.228          | 38.17714 | 43.5064  |
| 3377.71           | 38.16941 | 43.51392 |
| 3378.192          | 38.16169 | 43.52143 |
| 3378.675          | 38.15397 | 43.52895 |
| 3379.156          | 38.14624 | 43.53646 |
| 3379.639          | 38.13851 | 43.54398 |
| 3380.121          | 38.13079 | 43.55148 |
| 3380.603          | 38.12307 | 43.559   |
| 3381.085          | 38.11535 | 43.56652 |
| 3381.567          | 38.10762 | 43.57403 |
| 3382.049          | 38.10309 | 43.58154 |
| 3382.531          | 38.09856 | 43.58906 |
| 3383.013          | 38.09403 | 43.59657 |
| 3383.496          | 38.0895  | 43.60409 |
| 3383.978          | 38.08498 | 43.6116  |
| 3384.46           | 38.08045 | 43.61911 |
| 3384.942          | 38.07592 | 43.62663 |
| 3385.424          | 38.07139 | 43.63414 |
| 3385.906          | 38.06686 | 43.64166 |
| 3386.388          | 38.06233 | 43.64917 |
| 3386.87           | 38.0578  | 43.65669 |
| 3387.353          | 38.05328 | 43.6642  |
| 3387.835          | 38.04874 | 43.67171 |
| 3388.317          | 38.04422 | 43.67923 |
| 3388.799          | 38.03969 | 43.68675 |
| 3389.281          | 38.03516 | 43.69426 |
| 3389.763          | 38.04854 | 43.70177 |
| 3390.245          | 38.06191 | 43.70929 |
| 3390.727          | 38.07529 | 43.7168  |
| 3391.209          | 38.08866 | 43.72432 |
| 3391.692          | 38.10203 | 43.73183 |
| 3392.174          | 38.11541 | 43.73934 |
| 3392.656          | 38.12877 | 43.74686 |
| 3393.138          | 38.14215 | 43.75437 |
| 3393.62           | 38.15553 | 43.76188 |
| 3394.102          | 38.1689  | 43.76939 |
| 3394.584          | 38.18227 | 43.77691 |
| 3395.066          | 38.19564 | 43.78443 |
| 3395.549          | 38.20902 | 43.79194 |
| 3396.031          | 38.22239 | 43.79945 |
| 3396.513          | 38.23576 | 43.80697 |
| 3396.995          | 38.24914 | 43.82035 |

| Wavenumber (cm-1) | After    | Before   |
|-------------------|----------|----------|
| 3397.477          | 38.26251 | 43.83373 |
| 3397.959          | 38.27589 | 43.8471  |
| 3398.441          | 38.28926 | 43.86048 |
| 3398.923          | 38.30263 | 43.87386 |
| 3399.406          | 38.31601 | 43.88724 |
| 3399.888          | 38.32938 | 43.90061 |
| 3400.37           | 38.34275 | 43.91399 |
| 3400.852          | 38.35612 | 43.92737 |
| 3401.334          | 38.3695  | 43.94075 |
| 3401.816          | 38.38287 | 43.95413 |
| 3402.298          | 38.39625 | 43.9675  |
| 3402.78           | 38.40961 | 43.98089 |
| 3403.262          | 38.42299 | 43.99426 |
| 3403.745          | 38.43636 | 44.00764 |
| 3404.227          | 38.44973 | 44.02102 |
| 3404.709          | 38.46311 | 44.03439 |
| 3405.191          | 38.47649 | 44.04778 |
| 3405.673          | 38.48986 | 44.06115 |
| 3406.155          | 38.50323 | 44.07453 |
| 3406.637          | 38.5166  | 44.08791 |
| 3407.119          | 38.52998 | 44.10129 |
| 3407.602          | 38.54335 | 44.11466 |
| 3408.083          | 38.55672 | 44.12804 |
| 3408.566          | 38.5701  | 44.14142 |
| 3409.048          | 38.58347 | 44.1548  |
| 3409.53           | 38.59684 | 44.16817 |
| 3410.012          | 38.61022 | 44.18155 |
| 3410.494          | 38.62359 | 44.19493 |
| 3410.976          | 38.63696 | 44.20831 |
| 3411.458          | 38.65034 | 44.22168 |
| 3411.94           | 38.66371 | 44.23506 |
| 3412.423          | 38.67708 | 44.24844 |
| 3412.905          | 38.69046 | 44.26183 |
| 3413.387          | 38.70383 | 44.27519 |
| 3413.869          | 38.71721 | 44.28858 |
| 3414.351          | 38.73058 | 44.30196 |
| 3414.833          | 38.74395 | 44.31534 |
| 3415.315          | 38.75732 | 44.32871 |
| 3415.797          | 38.77069 | 44.34209 |
| 3416.28           | 38.78407 | 44.35547 |
| 3416.762          | 38.79744 | 44.36885 |
| 3417.244          | 38.81082 | 44.38222 |
| 3417.726          | 38.82419 | 44.3956  |
| 3418.208          | 38.83756 | 44.40898 |
| 3418.69           | 38.85094 | 44.42236 |
| 3419.172          | 38.86432 | 44.43573 |
| 3419.654          | 38.87768 | 44.44911 |
| 3420.136          | 38.89106 | 44.46249 |
| 3420.619          | 38.90443 | 44.47587 |
| 3421.101          | 38.91781 | 44.48924 |
| 3421.583          | 38.93118 | 44.50263 |
| 3422.065          | 38.94455 | 44.516   |
| 3422.547          | 38.95792 | 44.52938 |
| 3423.029          | 38.9713  | 44.54276 |
| 3423.511          | 38.98467 | 44.55614 |

| Wavenumber (cm-1) | After    | Before   |
|-------------------|----------|----------|
| 3423.993          | 38.99804 | 44.56952 |
| 3424.476          | 39.01142 | 44.58289 |
| 3424.958          | 39.0248  | 44.59627 |
| 3425.44           | 39.03817 | 44.60965 |
| 3425.922          | 39.05154 | 44.62302 |
| 3426.404          | 39.06491 | 44.63641 |
| 3426.886          | 39.09145 | 44.64978 |
| 3427.368          | 39.118   | 44.66316 |
| 3427.85           | 39.14454 | 44.67654 |
| 3428.333          | 39.17107 | 44.68992 |
| 3428.815          | 39.19761 | 44.70329 |
| 3429.297          | 39.22416 | 44.71667 |
| 3429.779          | 39.2507  | 44.73005 |
| 3430.261          | 39.27723 | 44.74343 |
| 3430.743          | 39.30377 | 44.7568  |
| 3431.225          | 39.33031 | 44.77018 |
| 3431.707          | 39.35686 | 44.78356 |
| 3432.189          | 39.38338 | 44.79694 |
| 3432.672          | 39.40993 | 44.81032 |
| 3433.154          | 39.43647 | 44.82369 |
| 3433.636          | 39.46301 | 44.83708 |
| 3434.118          | 39.48954 | 44.85045 |
| 3434.6            | 39.51608 | 44.86383 |
| 3435.082          | 39.54263 | 44.87721 |
| 3435.564          | 39.56917 | 44.89058 |
| 3436.046          | 39.5957  | 44.90397 |
| 3436.529          | 39.62225 | 44.91734 |
| 3437.01           | 39.64879 | 44.93691 |
| 3437.493          | 39.67533 | 44.95648 |
| 3437.975          | 39.70186 | 44.97604 |
| 3438.457          | 39.7284  | 44.99561 |
| 3438.939          | 39.75494 | 45.01518 |
| 3439.421          | 39.78149 | 45.03475 |
| 3439.903          | 39.80802 | 45.05431 |
| 3440.385          | 39.83456 | 45.07389 |
| 3440.867          | 39.8611  | 45.09346 |
| 3441.35           | 39.88764 | 45.11303 |
| 3441.832          | 39.91417 | 45.13259 |
| 3442.314          | 39.94072 | 45.15216 |
| 3442.796          | 39.96726 | 45.17173 |
| 3443.278          | 39.9938  | 45.19129 |
| 3443.76           | 40.02034 | 45.21086 |
| 3444.242          | 40.04688 | 45.23044 |
| 3444.724          | 40.09177 | 45.25001 |
| 3445.207          | 40.13747 | 45.26958 |
| 3445.689          | 40.184   | 45.28914 |
| 3446.171          | 40.23128 | 45.30871 |
| 3446.653          | 40.27964 | 45.32828 |
| 3447.135          | 40.32798 | 45.34784 |
| 3447.617          | 40.37567 | 45.36742 |
| 3448.099          | 40.42149 | 45.38699 |
| 3448.581          | 40.46333 | 45.40656 |
| 3449.063          | 40.50314 | 45.42613 |
| 3449.546          | 40.54205 | 45.44569 |
| 3450.028          | 40.58043 | 45.46526 |



| Wavenumber (cm-1) | After    | Before   |
|-------------------|----------|----------|
| 3450.51           | 40.61906 | 45.48483 |
| 3450.992          | 40.65778 | 45.5044  |
| 3451.474          | 40.69659 | 45.52396 |
| 3451.956          | 40.7358  | 45.54353 |
| 3452.438          | 40.77571 | 45.56311 |
| 3452.92           | 40.81634 | 45.58268 |
| 3453.403          | 40.85782 | 45.60224 |
| 3453.885          | 40.90016 | 45.62181 |
| 3454.367          | 40.94318 | 45.64138 |
| 3454.849          | 40.98751 | 45.66094 |
| 3455.331          | 41.03347 | 45.68052 |
| 3455.813          | 41.08189 | 45.70009 |
| 3456.295          | 41.13424 | 45.71966 |
| 3456.777          | 41.18898 | 45.73923 |
| 3457.26           | 41.24518 | 45.75879 |
| 3457.742          | 41.30245 | 45.77836 |
| 3458.224          | 41.36002 | 45.79794 |
| 3458.706          | 41.41805 | 45.81749 |
| 3459.188          | 41.47647 | 45.83706 |
| 3459.67           | 41.53517 | 45.85664 |
| 3460.152          | 41.59418 | 45.87621 |
| 3460.634          | 41.65293 | 45.89578 |
| 3461.116          | 41.71088 | 45.91534 |
| 3461.599          | 41.76794 | 45.93491 |
| 3462.081          | 41.82423 | 45.96841 |
| 3462.563          | 41.87864 | 46.00191 |
| 3463.045          | 41.93064 | 46.0354  |
| 3463.527          | 41.97861 | 46.0689  |
| 3464.009          | 42.01985 | 46.1024  |
| 3464.491          | 42.05713 | 46.1359  |
| 3464.973          | 42.09213 | 46.16939 |
| 3465.456          | 42.12551 | 46.20289 |
| 3465.938          | 42.15855 | 46.2364  |
| 3466.42           | 42.19104 | 46.2699  |
| 3466.902          | 42.22311 | 46.30338 |
| 3467.384          | 42.25513 | 46.33688 |
| 3467.866          | 42.28732 | 46.37039 |
| 3468.348          | 42.32026 | 46.40389 |
| 3468.83           | 42.3546  | 46.43737 |
| 3469.313          | 42.39044 | 46.47088 |
| 3469.794          | 42.42762 | 46.50438 |
| 3470.277          | 42.46762 | 46.53788 |
| 3470.759          | 42.51118 | 46.57138 |
| 3471.241          | 42.56038 | 46.60487 |
| 3471.723          | 42.61871 | 46.63837 |
| 3472.205          | 42.68266 | 46.67187 |
| 3472.687          | 42.75013 | 46.70538 |
| 3473.169          | 42.82037 | 46.73886 |
| 3473.651          | 42.89188 | 46.77236 |
| 3474.134          | 42.9648  | 46.80586 |
| 3474.616          | 43.039   | 46.83936 |
| 3475.098          | 43.11385 | 46.87285 |
| 3475.58           | 43.18874 | 46.90635 |
| 3476.062          | 43.26343 | 46.93986 |
| 3476.544          | 43.33751 | 46.97336 |

| Wavenumber (cm-1) | After    | Before   |
|-------------------|----------|----------|
| 3477.026          | 43.41084 | 47.00684 |
| 3477.508          | 43.48362 | 47.04035 |
| 3477.99           | 43.55451 | 47.07385 |
| 3478.473          | 43.62284 | 47.10735 |
| 3478.955          | 43.6869  | 47.14084 |
| 3479.437          | 43.74382 | 47.17434 |
| 3479.919          | 43.79636 | 47.20784 |
| 3480.401          | 43.84616 | 47.24134 |
| 3480.883          | 43.89372 | 47.27483 |
| 3481.365          | 43.94008 | 47.30833 |
| 3481.847          | 43.98523 | 47.34183 |
| 3482.33           | 44.02928 | 47.37534 |
| 3482.812          | 44.07295 | 47.40882 |
| 3483.294          | 44.11718 | 47.44232 |
| 3483.776          | 44.16145 | 47.47582 |
| 3484.258          | 44.20555 | 47.5258  |
| 3484.74           | 44.24953 | 47.57579 |
| 3485.222          | 44.2933  | 47.62579 |
| 3485.704          | 44.3371  | 47.67579 |
| 3486.187          | 44.38111 | 47.72576 |
| 3486.669          | 44.42541 | 47.77576 |
| 3487.151          | 44.47006 | 47.82575 |
| 3487.633          | 44.51525 | 47.87575 |
| 3488.115          | 44.5611  | 47.92572 |
| 3488.597          | 44.60786 | 47.97572 |
| 3489.079          | 44.65591 | 48.02572 |
| 3489.561          | 44.70498 | 48.07572 |
| 3490.043          | 44.75512 | 48.12569 |
| 3490.526          | 44.80593 | 48.17569 |
| 3491.008          | 44.85653 | 48.22569 |
| 3491.49           | 44.90835 | 48.27568 |
| 3491.972          | 44.96249 | 48.32565 |
| 3492.454          | 45.01904 | 48.37565 |
| 3492.936          | 45.0779  | 48.42565 |
| 3493.418          | 45.14076 | 48.47565 |
| 3493.9            | 45.20834 | 48.52564 |
| 3494.383          | 45.28328 | 48.57562 |
| 3494.865          | 45.37005 | 48.62561 |
| 3495.347          | 45.46387 | 48.67561 |
| 3495.829          | 45.56184 | 48.72561 |
| 3496.311          | 45.66271 | 48.77558 |
| 3496.793          | 45.76417 | 48.82558 |
| 3497.275          | 45.86656 | 48.87557 |
| 3497.757          | 45.96965 | 48.92558 |
| 3498.24           | 46.07291 | 48.97554 |
| 3498.721          | 46.1762  | 49.02554 |
| 3499.204          | 46.278   | 49.07554 |
| 3499.686          | 46.37681 | 49.12554 |
| 3500.168          | 46.47233 | 49.17551 |
| 3500.65           | 46.56485 | 49.22551 |
| 3501.132          | 46.65121 | 49.27551 |
| 3501.614          | 46.72988 | 49.32551 |
| 3502.096          | 46.79637 | 49.37547 |
| 3502.578          | 46.84319 | 49.42547 |
| 3503.061          | 46.87788 | 49.47547 |

| Wavenumber (cm-1) | After    | Before   |
|-------------------|----------|----------|
| 3503.543          | 46.90494 | 49.52547 |
| 3504.025          | 46.92599 | 49.57544 |
| 3504.507          | 46.9442  | 49.62544 |
| 3504.989          | 46.95935 | 49.67544 |
| 3505.471          | 46.97174 | 49.72543 |
| 3505.953          | 46.98292 | 49.77541 |
| 3506.435          | 46.99445 | 49.82541 |
| 3506.917          | 47.0065  | 49.8754  |
| 3507.4            | 47.01969 | 49.9254  |
| 3507.882          | 47.03429 | 49.97537 |
| 3508.364          | 47.04999 | 50.02537 |
| 3508.846          | 47.06918 | 50.07537 |
| 3509.328          | 47.09316 | 50.12536 |
| 3509.81           | 47.12491 | 50.17534 |
| 3510.292          | 47.16937 | 50.22533 |
| 3510.774          | 47.222   | 50.27533 |
| 3511.257          | 47.28013 | 50.32533 |
| 3511.739          | 47.34306 | 50.3753  |
| 3512.221          | 47.40919 | 50.4253  |
| 3512.703          | 47.47855 | 50.4753  |
| 3513.185          | 47.55105 | 50.52529 |
| 3513.667          | 47.62547 | 50.57526 |
| 3514.149          | 47.70012 | 50.62526 |
| 3514.631          | 47.77627 | 50.67526 |
| 3515.114          | 47.85459 | 50.72526 |
| 3515.596          | 47.93508 | 50.77525 |
| 3516.078          | 48.01796 | 50.82523 |
| 3516.56           | 48.10327 | 50.87523 |
| 3517.042          | 48.19094 | 50.98435 |
| 3517.524          | 48.2815  | 51.09918 |
| 3518.006          | 48.37587 | 51.22112 |
| 3518.488          | 48.47279 | 51.34786 |
| 3518.97           | 48.57146 | 51.47794 |
| 3519.453          | 48.67141 | 51.6103  |
| 3519.935          | 48.77182 | 51.74324 |
| 3520.417          | 48.87286 | 51.87714 |
| 3520.899          | 48.97439 | 52.01168 |
| 3521.381          | 49.07649 | 52.14718 |
| 3521.863          | 49.17958 | 52.28488 |
| 3522.345          | 49.2824  | 52.42161 |
| 3522.827          | 49.3839  | 52.55474 |
| 3523.31           | 49.48392 | 52.68385 |
| 3523.792          | 49.5825  | 52.80898 |
| 3524.274          | 49.67789 | 52.92599 |
| 3524.756          | 49.76924 | 53.03282 |
| 3525.238          | 49.85391 | 53.12313 |
| 3525.72           | 49.92749 | 53.1863  |
| 3526.202          | 49.99448 | 53.23315 |
| 3526.684          | 50.05756 | 53.27015 |
| 3527.167          | 50.11775 | 53.2998  |
| 3527.648          | 50.17709 | 53.32696 |
| 3528.131          | 50.23529 | 53.35094 |
| 3528.613          | 50.29253 | 53.37213 |
| 3529.095          | 50.34947 | 53.39211 |
| 3529.577          | 50.40661 | 53.41196 |

| Wavenumber (cm-1) | After    | Before   |
|-------------------|----------|----------|
| 3530.059          | 50.46469 | 53.43359 |
| 3530.541          | 50.52456 | 53.45915 |
| 3531.023          | 50.5864  | 53.48905 |
| 3531.505          | 50.64993 | 53.52266 |
| 3531.988          | 50.71732 | 53.56532 |
| 3532.47           | 50.78966 | 53.61972 |
| 3532.952          | 50.8699  | 53.69325 |
| 3533.434          | 50.96302 | 53.79836 |
| 3533.916          | 51.06408 | 53.92259 |
| 3534.398          | 51.17011 | 54.05853 |
| 3534.88           | 51.28008 | 54.20351 |
| 3535.362          | 51.3919  | 54.35222 |
| 3535.844          | 51.50577 | 54.50521 |
| 3536.327          | 51.62149 | 54.66202 |
| 3536.809          | 51.7381  | 54.82037 |
| 3537.291          | 51.85458 | 54.97809 |
| 3537.773          | 51.97083 | 55.13441 |
| 3538.255          | 52.08646 | 55.28797 |
| 3538.737          | 52.20132 | 55.43835 |
| 3539.219          | 52.31562 | 55.5862  |
| 3539.701          | 52.4278  | 55.72698 |
| 3540.184          | 52.53702 | 55.85835 |
| 3540.666          | 52.6413  | 55.97441 |
| 3541.148          | 52.73733 | 56.06536 |
| 3541.63           | 52.82822 | 56.14065 |
| 3542.112          | 52.91578 | 56.20588 |
| 3542.594          | 53.00052 | 56.26281 |
| 3543.076          | 53.08353 | 56.31517 |
| 3543.558          | 53.16484 | 56.3627  |
| 3544.041          | 53.24454 | 56.40567 |
| 3544.523          | 53.32357 | 56.44617 |
| 3545.005          | 53.40316 | 56.48667 |
| 3545.487          | 53.48238 | 56.52635 |
| 3545.969          | 53.56071 | 56.56513 |
| 3546.451          | 53.63819 | 56.60319 |
| 3546.933          | 53.71472 | 56.64007 |
| 3547.415          | 53.79017 | 56.67762 |
| 3547.897          | 53.86456 | 56.71692 |
| 3548.38           | 53.93733 | 56.75995 |
| 3548.862          | 54.00748 | 56.81001 |
| 3549.344          | 54.07635 | 56.86425 |
| 3549.826          | 54.14479 | 56.92108 |
| 3550.308          | 54.21328 | 56.98014 |
| 3550.79           | 54.28273 | 57.04049 |
| 3551.272          | 54.35291 | 57.10227 |
| 3551.754          | 54.42391 | 57.16551 |
| 3552.237          | 54.49564 | 57.22956 |
| 3552.719          | 54.5675  | 57.29345 |
| 3553.201          | 54.64095 | 57.35806 |
| 3553.683          | 54.71722 | 57.42392 |
| 3554.165          | 54.79648 | 57.49114 |
| 3554.647          | 54.87864 | 57.55997 |
| 3555.129          | 54.96572 | 57.6305  |
| 3555.611          | 55.05869 | 57.70278 |
| 3556.094          | 55.16062 | 57.77721 |

| Wavenumber (cm-1) | After    | Before   |
|-------------------|----------|----------|
| 3556.575          | 55.27667 | 57.85442 |
| 3557.058          | 55.40151 | 57.93379 |
| 3557.54           | 55.53194 | 58.01494 |
| 3558.022          | 55.66669 | 58.09773 |
| 3558.504          | 55.80339 | 58.18188 |
| 3558.986          | 55.94231 | 58.26745 |
| 3559.468          | 56.08321 | 58.35445 |
| 3559.95           | 56.22525 | 58.44283 |
| 3560.432          | 56.36778 | 58.53264 |
| 3560.915          | 56.50994 | 58.62364 |
| 3561.397          | 56.65071 | 58.71563 |
| 3561.879          | 56.78985 | 58.80862 |
| 3562.361          | 56.9276  | 58.90264 |
| 3562.843          | 57.06145 | 58.99727 |
| 3563.325          | 57.19007 | 59.09232 |
| 3563.807          | 57.31    | 59.18711 |
| 3564.289          | 57.41541 | 59.28058 |
| 3564.771          | 57.51202 | 59.37386 |
| 3565.254          | 57.60323 | 59.46768 |
| 3565.736          | 57.69015 | 59.56231 |
| 3566.218          | 57.77505 | 59.6583  |
| 3566.7            | 57.85783 | 59.75559 |
| 3567.182          | 57.93874 | 59.85423 |
| 3567.664          | 58.01908 | 59.95439 |
| 3568.146          | 58.10043 | 60.05618 |
| 3568.628          | 58.1823  | 60.15986 |
| 3569.111          | 58.26468 | 60.26571 |
| 3569.593          | 58.34771 | 60.37379 |
| 3570.075          | 58.43118 | 60.48405 |
| 3570.557          | 58.51623 | 60.59713 |
| 3571.039          | 58.60351 | 60.71335 |
| 3571.521          | 58.69419 | 60.8336  |
| 3572.003          | 58.79015 | 60.95933 |
| 3572.485          | 58.8899  | 61.0891  |
| 3572.968          | 58.99262 | 61.22202 |
| 3573.45           | 59.09828 | 61.3579  |
| 3573.932          | 59.20666 | 61.49631 |
| 3574.414          | 59.31757 | 61.63701 |
| 3574.896          | 59.43101 | 61.77986 |
| 3575.378          | 59.54617 | 61.92415 |
| 3575.86           | 59.66164 | 62.06873 |
| 3576.342          | 59.77921 | 62.21467 |
| 3576.824          | 59.90017 | 62.36269 |
| 3577.307          | 60.02464 | 62.5127  |
| 3577.789          | 60.15262 | 62.66462 |
| 3578.271          | 60.28568 | 62.81924 |
| 3578.753          | 60.4245  | 62.97685 |
| 3579.235          | 60.57174 | 63.13896 |
| 3579.717          | 60.73196 | 63.30822 |
| 3580.199          | 60.90022 | 63.48146 |
| 3580.681          | 61.07352 | 63.65672 |
| 3581.164          | 61.25056 | 63.83296 |
| 3581.646          | 61.42898 | 64.00831 |
| 3582.128          | 61.60906 | 64.18322 |
| 3582.61           | 61.79052 | 64.35749 |

| Wavenumber (cm-1) | After    | Before   |
|-------------------|----------|----------|
| 3583.092          | 61.97269 | 64.53115 |
| 3583.574          | 62.15536 | 64.70501 |
| 3584.056          | 62.33703 | 64.87661 |
| 3584.538          | 62.51622 | 65.04385 |
| 3585.021          | 62.69261 | 65.20643 |
| 3585.502          | 62.86642 | 65.36458 |
| 3585.985          | 63.03455 | 65.51463 |
| 3586.467          | 63.19543 | 65.6548  |
| 3586.949          | 63.34471 | 65.77958 |
| 3587.431          | 63.4751  | 65.87969 |
| 3587.913          | 63.5938  | 65.96471 |
| 3588.395          | 63.70509 | 66.04038 |
| 3588.877          | 63.81046 | 66.10894 |
| 3589.359          | 63.91286 | 66.17478 |
| 3589.842          | 64.01207 | 66.23728 |
| 3590.324          | 64.10834 | 66.29682 |
| 3590.806          | 64.20316 | 66.35476 |
| 3591.288          | 64.29809 | 66.4119  |
| 3591.77           | 64.3931  | 66.47025 |
| 3592.252          | 64.48858 | 66.53188 |
| 3592.734          | 64.58473 | 66.59721 |
| 3593.216          | 64.68123 | 66.6657  |
| 3593.698          | 64.7801  | 66.74239 |
| 3594.181          | 64.88248 | 66.82979 |
| 3594.663          | 64.99083 | 66.93487 |
| 3595.145          | 65.10929 | 67.06939 |
| 3595.627          | 65.23407 | 67.22161 |
| 3596.109          | 65.36296 | 67.38455 |
| 3596.591          | 65.49532 | 67.55566 |
| 3597.073          | 65.62975 | 67.7298  |
| 3597.555          | 65.76639 | 67.90771 |
| 3598.038          | 65.90521 | 68.089   |
| 3598.52           | 66.04538 | 68.27183 |
| 3599.002          | 66.18586 | 68.45471 |
| 3599.484          | 66.32725 | 68.63621 |
| 3599.966          | 66.46976 | 68.81452 |
| 3600.448          | 66.61339 | 68.98928 |
| 3600.93           | 66.75842 | 69.16122 |
| 3601.412          | 66.90436 | 69.32522 |
| 3601.895          | 67.05091 | 69.47875 |
| 3602.377          | 67.19764 | 69.61489 |
| 3602.859          | 67.3438  | 69.72203 |
| 3603.341          | 67.49005 | 69.81178 |
| 3603.823          | 67.6368  | 69.89105 |
| 3604.305          | 67.78416 | 69.9623  |
| 3604.787          | 67.93246 | 70.03054 |
| 3605.269          | 68.08157 | 70.09521 |
| 3605.751          | 68.23144 | 70.15669 |
| 3606.234          | 68.38208 | 70.21707 |
| 3606.716          | 68.53342 | 70.27827 |
| 3607.198          | 68.68567 | 70.3411  |
| 3607.68           | 68.83904 | 70.40694 |
| 3608.162          | 68.9935  | 70.47615 |
| 3608.644          | 69.14896 | 70.5481  |
| 3609.126          | 69.30587 | 70.62714 |

| Wavenumber (cm-1) | After    | Before   |
|-------------------|----------|----------|
| 3609.608          | 69.46446 | 70.71554 |
| 3610.091          | 69.62543 | 70.81899 |
| 3610.573          | 69.79003 | 70.94708 |
| 3611.055          | 69.95688 | 71.09048 |
| 3611.537          | 70.12511 | 71.24369 |
| 3612.019          | 70.29431 | 71.40489 |
| 3612.501          | 70.46381 | 71.57034 |
| 3612.983          | 70.63366 | 71.74035 |
| 3613.465          | 70.80377 | 71.91464 |
| 3613.948          | 70.97398 | 72.09126 |
| 3614.429          | 71.14424 | 72.26809 |
| 3614.912          | 71.31404 | 72.44548 |
| 3615.394          | 71.48292 | 72.62315 |
| 3615.876          | 71.65073 | 72.8009  |
| 3616.358          | 71.81757 | 72.97921 |
| 3616.84           | 71.98248 | 73.15575 |
| 3617.322          | 72.14496 | 73.32924 |
| 3617.804          | 72.30364 | 73.49696 |
| 3618.286          | 72.45627 | 73.65431 |
| 3618.769          | 72.60509 | 73.80549 |
| 3619.251          | 72.7514  | 73.95295 |
| 3619.733          | 72.89564 | 74.09741 |
| 3620.215          | 73.03876 | 74.24056 |
| 3620.697          | 73.18066 | 74.38204 |
| 3621.179          | 73.32137 | 74.52184 |
| 3621.661          | 73.46132 | 74.66065 |
| 3622.143          | 73.60088 | 74.79916 |
| 3622.625          | 73.74016 | 74.9373  |
| 3623.108          | 73.87935 | 75.07527 |
| 3623.59           | 74.01852 | 75.21301 |
| 3624.072          | 74.15752 | 75.35014 |
| 3624.554          | 74.29713 | 75.48788 |
| 3625.036          | 74.43774 | 75.62682 |
| 3625.518          | 74.58032 | 75.76853 |
| 3626              | 74.72654 | 75.9158  |
| 3626.482          | 74.87479 | 76.06567 |
| 3626.965          | 75.02413 | 76.21642 |
| 3627.447          | 75.17414 | 76.36718 |
| 3627.929          | 75.32392 | 76.5163  |
| 3628.411          | 75.47391 | 76.66438 |
| 3628.893          | 75.62416 | 76.81142 |
| 3629.375          | 75.77487 | 76.95765 |
| 3629.857          | 75.92668 | 77.10407 |
| 3630.339          | 76.07834 | 77.24838 |
| 3630.822          | 76.22882 | 77.38865 |
| 3631.304          | 76.37811 | 77.52473 |
| 3631.786          | 76.52651 | 77.65703 |
| 3632.268          | 76.67209 | 77.78205 |
| 3632.75           | 76.81399 | 77.89818 |
| 3633.232          | 76.94922 | 78.00007 |
| 3633.714          | 77.07265 | 78.07855 |
| 3634.196          | 77.1899  | 78.14343 |
| 3634.678          | 77.3044  | 78.2006  |
| 3635.161          | 77.41782 | 78.25269 |
| 3635.643          | 77.53331 | 78.30457 |

| Wavenumber (cm-1) | After    | Before   |
|-------------------|----------|----------|
| 3636.125          | 77.64993 | 78.35529 |
| 3636.607          | 77.76782 | 78.40528 |
| 3637.089          | 77.88682 | 78.45535 |
| 3637.571          | 78.00546 | 78.50517 |
| 3638.053          | 78.12773 | 78.55861 |
| 3638.535          | 78.25706 | 78.61931 |
| 3639.018          | 78.39381 | 78.68782 |
| 3639.5            | 78.53735 | 78.76347 |
| 3639.982          | 78.69393 | 78.85355 |
| 3640.464          | 78.86642 | 78.96158 |
| 3640.946          | 79.06422 | 79.09813 |
| 3641.428          | 79.30329 | 79.28103 |
| 3641.91           | 79.5668  | 79.49204 |
| 3642.392          | 79.84463 | 79.72023 |
| 3642.875          | 80.13264 | 79.96149 |
| 3643.356          | 80.42296 | 80.2078  |
| 3643.839          | 80.71662 | 80.45995 |
| 3644.321          | 81.0128  | 80.71716 |
| 3644.803          | 81.30917 | 80.97618 |
| 3645.285          | 81.60442 | 81.23425 |
| 3645.767          | 81.89452 | 81.48931 |
| 3646.249          | 82.17535 | 81.73869 |
| 3646.731          | 82.446   | 81.9816  |
| 3647.213          | 82.70731 | 82.2189  |
| 3647.696          | 82.94991 | 82.44297 |
| 3648.178          | 83.16903 | 82.6499  |
| 3648.66           | 83.35156 | 82.8296  |
| 3649.142          | 83.47558 | 82.96529 |
| 3649.624          | 83.56284 | 83.07316 |
| 3650.106          | 83.6263  | 83.16276 |
| 3650.588          | 83.67042 | 83.2371  |
| 3651.07           | 83.70419 | 83.30253 |
| 3651.552          | 83.72694 | 83.35865 |
| 3652.035          | 83.73952 | 83.40598 |
| 3652.517          | 83.74642 | 83.44821 |
| 3652.999          | 83.75251 | 83.48981 |
| 3653.481          | 83.75757 | 83.52908 |
| 3653.963          | 83.76279 | 83.56566 |
| 3654.445          | 83.76886 | 83.59988 |
| 3654.927          | 83.77478 | 83.63098 |
| 3655.409          | 83.78673 | 83.66181 |
| 3655.892          | 83.80803 | 83.69404 |
| 3656.374          | 83.84613 | 83.7305  |
| 3656.856          | 83.91331 | 83.7758  |
| 3657.338          | 83.99839 | 83.82628 |
| 3657.82           | 84.09479 | 83.87983 |
| 3658.302          | 84.20084 | 83.93626 |
| 3658.784          | 84.31262 | 83.99466 |
| 3659.266          | 84.43027 | 84.05502 |
| 3659.749          | 84.55361 | 84.11743 |
| 3660.231          | 84.67965 | 84.1806  |
| 3660.713          | 84.80427 | 84.24239 |
| 3661.195          | 84.93065 | 84.30544 |
| 3661.677          | 85.06056 | 84.37156 |
| 3662.159          | 85.19408 | 84.44103 |



| Wavenumber (cm-1) | After    | Before   |
|-------------------|----------|----------|
| 3662.641          | 85.33178 | 84.51412 |
| 3663.123          | 85.47387 | 84.59263 |
| 3663.605          | 85.62024 | 84.67737 |
| 3664.088          | 85.77232 | 84.77149 |
| 3664.57           | 85.93259 | 84.88024 |
| 3665.052          | 86.09783 | 84.99812 |
| 3665.534          | 86.26604 | 85.12182 |
| 3666.016          | 86.43607 | 85.24993 |
| 3666.498          | 86.60608 | 85.37985 |
| 3666.98           | 86.77628 | 85.51198 |
| 3667.462          | 86.94637 | 85.64613 |
| 3667.945          | 87.11621 | 85.78167 |
| 3668.427          | 87.28629 | 85.91846 |
| 3668.909          | 87.45428 | 86.05483 |
| 3669.391          | 87.61819 | 86.18917 |
| 3669.873          | 87.77763 | 86.32121 |
| 3670.355          | 87.93264 | 86.4513  |
| 3670.837          | 88.07977 | 86.57596 |
| 3671.319          | 88.21727 | 86.69345 |
| 3671.802          | 88.34005 | 86.79882 |
| 3672.283          | 88.43961 | 86.88371 |
| 3672.766          | 88.52441 | 86.95658 |
| 3673.248          | 88.59947 | 87.02248 |
| 3673.73           | 88.66662 | 87.08341 |
| 3674.212          | 88.72948 | 87.14333 |
| 3674.694          | 88.7876  | 87.20143 |
| 3675.176          | 88.84127 | 87.2579  |
| 3675.658          | 88.89195 | 87.3136  |
| 3676.14           | 88.94098 | 87.36865 |
| 3676.623          | 88.98901 | 87.42543 |
| 3677.105          | 89.03709 | 87.48628 |
| 3677.587          | 89.08545 | 87.55148 |
| 3678.069          | 89.13361 | 87.62036 |
| 3678.551          | 89.18485 | 87.69815 |
| 3679.033          | 89.2408  | 87.78735 |
| 3679.515          | 89.30575 | 87.89547 |
| 3679.997          | 89.38691 | 88.03524 |
| 3680.479          | 89.47722 | 88.19349 |
| 3680.962          | 89.57249 | 88.36231 |
| 3681.444          | 89.67125 | 88.53858 |
| 3681.926          | 89.77051 | 88.71627 |
| 3682.408          | 89.87068 | 88.89618 |
| 3682.89           | 89.9716  | 89.07774 |
| 3683.372          | 90.07208 | 89.25901 |
| 3683.854          | 90.17105 | 89.43874 |
| 3684.336          | 90.26799 | 89.61431 |
| 3684.819          | 90.36211 | 89.78294 |
| 3685.301          | 90.45322 | 89.94401 |
| 3685.783          | 90.5418  | 90.09822 |
| 3686.265          | 90.62515 | 90.13747 |
| 3686.747          | 90.70193 | 90.17671 |
| 3687.229          | 90.76855 | 90.21593 |
| 3687.711          | 90.81902 | 90.25518 |
| 3688.193          | 90.85931 | 90.29443 |
| 3688.676          | 90.89306 | 90.33365 |

| Wavenumber (cm-1) | After    | Before   |
|-------------------|----------|----------|
| 3689.158          | 90.92152 | 90.37289 |
| 3689.64           | 90.94716 | 90.41213 |
| 3690.122          | 90.96983 | 90.45137 |
| 3690.604          | 90.9898  | 90.49062 |
| 3691.086          | 91.00832 | 90.52984 |
| 3691.568          | 91.02675 | 90.56909 |
| 3692.05           | 91.04507 | 90.60832 |
| 3692.532          | 91.06363 | 90.64755 |
| 3693.015          | 91.0826  | 90.6868  |
| 3693.497          | 91.10177 | 90.72604 |
| 3693.979          | 91.12283 | 90.76528 |
| 3694.461          | 91.14673 | 90.80453 |
| 3694.943          | 91.17551 | 90.84374 |
| 3695.425          | 91.21256 | 90.883   |
| 3695.907          | 91.25486 | 90.92223 |
| 3696.389          | 91.30062 | 90.96146 |
| 3696.872          | 91.34946 | 91.00071 |
| 3697.354          | 91.40048 | 91.03995 |
| 3697.836          | 91.45352 | 91.07919 |
| 3698.318          | 91.50848 | 91.11843 |
| 3698.8            | 91.56422 | 91.15765 |
| 3699.282          | 91.61903 | 91.19691 |
| 3699.764          | 91.67461 | 91.23615 |
| 3700.246          | 91.73206 | 91.27537 |
| 3700.729          | 91.79144 | 91.31461 |
| 3701.211          | 91.85277 | 91.35386 |
| 3701.693          | 91.91708 | 91.39311 |
| 3702.175          | 91.98476 | 91.43235 |
| 3702.657          | 92.0578  | 91.47157 |
| 3703.139          | 92.1396  | 91.51081 |
| 3703.621          | 92.22624 | 91.55006 |
| 3704.103          | 92.31532 | 91.58928 |
| 3704.585          | 92.40565 | 91.62852 |
| 3705.068          | 92.49507 | 91.66776 |
| 3705.55           | 92.58404 | 91.70701 |
| 3706.032          | 92.67232 | 91.74625 |
| 3706.514          | 92.7598  | 91.78548 |
| 3706.996          | 92.84715 | 91.82472 |
| 3707.478          | 92.9319  | 91.86396 |
| 3707.96           | 93.01189 | 91.90319 |
| 3708.442          | 93.08681 | 91.94244 |
| 3708.925          | 93.15692 | 91.98168 |
| 3709.406          | 93.21834 | 92.02092 |
| 3709.889          | 93.26917 | 92.06016 |
| 3710.371          | 93.30363 | 92.09939 |
| 3710.853          | 93.31198 | 92.13863 |
| 3711.335          | 93.30421 | 92.17787 |
| 3711.817          | 93.28635 | 92.2171  |
| 3712.299          | 93.26064 | 92.25634 |
| 3712.781          | 93.23143 | 92.29559 |
| 3713.263          | 93.1984  | 92.33483 |
| 3713.746          | 93.16203 | 92.37407 |
| 3714.228          | 93.12419 | 92.4133  |
| 3714.71           | 93.08665 | 92.45254 |
| 3715.192          | 93.05028 | 92.49178 |

| Wavenumber (cm-1) | After    | Before   |
|-------------------|----------|----------|
| 3715.674          | 93.01634 | 92.53101 |
| 3716.156          | 92.9853  | 92.57025 |
| 3716.638          | 92.95676 | 92.60949 |
| 3717.12           | 92.93458 | 92.64874 |
| 3717.603          | 92.92079 | 92.68798 |
| 3718.085          | 92.92043 | 92.7272  |
| 3718.567          | 92.94179 | 92.76645 |
| 3719.049          | 92.97705 | 92.8057  |
| 3719.531          | 93.02161 | 92.84492 |
| 3720.013          | 93.07416 | 92.88416 |
| 3720.495          | 93.13194 | 92.92341 |
| 3720.977          | 93.19487 | 92.96266 |
| 3721.459          | 93.2627  | 92.98472 |
| 3721.942          | 93.33317 | 93.0068  |
| 3722.424          | 93.40321 | 93.02886 |
| 3722.906          | 93.47502 | 93.05092 |
| 3723.388          | 93.54982 | 93.07298 |
| 3723.87           | 93.62752 | 93.09506 |
| 3724.352          | 93.70839 | 93.11712 |
| 3724.834          | 93.79258 | 93.13918 |
| 3725.316          | 93.88    | 93.16125 |
| 3725.799          | 93.97181 | 93.18332 |
| 3726.281          | 94.07011 | 93.20538 |
| 3726.763          | 94.17195 | 93.22745 |
| 3727.245          | 94.27549 | 93.24952 |
| 3727.727          | 94.37961 | 93.27159 |
| 3728.209          | 94.48245 | 93.29365 |
| 3728.691          | 94.58433 | 93.31571 |
| 3729.173          | 94.68486 | 93.33778 |
| 3729.656          | 94.78405 | 93.35986 |
| 3730.138          | 94.88266 | 93.38191 |
| 3730.62           | 94.97804 | 93.40398 |
| 3731.102          | 95.06795 | 93.42605 |
| 3731.584          | 95.15195 | 93.44811 |
| 3732.066          | 95.23009 | 93.47018 |
| 3732.548          | 95.29866 | 93.49224 |
| 3733.03           | 95.35577 | 93.51431 |
| 3733.512          | 95.39585 | 93.53639 |
| 3733.995          | 95.40963 | 93.55844 |
| 3734.477          | 95.40639 | 93.58051 |
| 3734.959          | 95.39171 | 93.60258 |
| 3735.441          | 95.36752 | 93.62465 |
| 3735.923          | 95.33763 | 93.64671 |
| 3736.405          | 95.30189 | 93.66877 |
| 3736.887          | 95.26071 | 93.69085 |
| 3737.369          | 95.21615 | 93.71291 |
| 3737.852          | 95.1705  | 93.73497 |
| 3738.333          | 95.12351 | 93.75704 |
| 3738.816          | 95.07553 | 93.77911 |
| 3739.298          | 95.0269  | 93.80118 |
| 3739.78           | 94.97729 | 93.82324 |
| 3740.262          | 94.92908 | 93.84531 |
| 3740.744          | 94.88364 | 93.86738 |
| 3741.226          | 94.84371 | 93.88944 |
| 3741.708          | 94.81377 | 93.91151 |

| Wavenumber (cm-1) | After    | Before   |
|-------------------|----------|----------|
| 3742.19           | 94.78999 | 93.93357 |
| 3742.673          | 94.77018 | 93.95564 |
| 3743.155          | 94.75397 | 93.97772 |
| 3743.637          | 94.74025 | 93.99978 |
| 3744.119          | 94.72897 | 94.02184 |
| 3744.601          | 94.72012 | 94.04391 |
| 3745.083          | 94.71243 | 94.06597 |
| 3745.565          | 94.7039  | 94.08804 |
| 3746.047          | 94.69667 | 94.1101  |
| 3746.53           | 94.69216 | 94.13217 |
| 3747.012          | 94.69051 | 94.15424 |
| 3747.494          | 94.6919  | 94.17631 |
| 3747.976          | 94.6976  | 94.19837 |
| 3748.458          | 94.70812 | 94.22044 |
| 3748.94           | 94.72579 | 94.2425  |
| 3749.422          | 94.75456 | 94.26458 |
| 3749.904          | 94.7901  | 94.28663 |
| 3750.386          | 94.82979 | 94.30871 |
| 3750.869          | 94.87247 | 94.33077 |
| 3751.351          | 94.916   | 94.35284 |
| 3751.833          | 94.96068 | 94.3749  |
| 3752.315          | 95.00626 | 94.39697 |
| 3752.797          | 95.0523  | 94.41904 |
| 3753.279          | 95.09875 | 94.4411  |
| 3753.761          | 95.14406 | 94.46316 |
| 3754.243          | 95.18671 | 94.48523 |
| 3754.726          | 95.22639 | 94.5073  |
| 3755.208          | 95.26335 | 94.52937 |
| 3755.69           | 95.29453 | 94.55142 |
| 3756.172          | 95.31844 | 94.57349 |
| 3756.654          | 95.33075 | 94.59557 |
| 3757.136          | 95.32417 | 94.61763 |
| 3757.618          | 95.30598 | 94.63969 |
| 3758.1            | 95.28056 | 94.66176 |
| 3758.583          | 95.24942 | 94.68383 |
| 3759.065          | 95.21568 | 94.7059  |
| 3759.547          | 95.17905 | 94.72795 |
| 3760.029          | 95.13982 | 94.75003 |
| 3760.511          | 95.09941 | 94.7721  |
| 3760.993          | 95.05925 | 94.78373 |
| 3761.475          | 95.01961 | 94.79536 |
| 3761.957          | 94.98114 | 94.80699 |
| 3762.439          | 94.94409 | 94.81863 |
| 3762.922          | 94.90813 | 94.83025 |
| 3763.404          | 94.87569 | 94.84187 |
| 3763.886          | 94.84808 | 94.8535  |
| 3764.368          | 94.82838 | 94.86513 |
| 3764.85           | 94.8217  | 94.87676 |
| 3765.332          | 94.82323 | 94.88838 |
| 3765.814          | 94.83013 | 94.90002 |
| 3766.296          | 94.8416  | 94.91165 |
| 3766.779          | 94.85586 | 94.92327 |
| 3767.26           | 94.87294 | 94.9349  |
| 3767.743          | 94.89272 | 94.94653 |
| 3768.225          | 94.91394 | 94.95815 |

| Wavenumber (cm-1) | After    | Before   |
|-------------------|----------|----------|
| 3768.707          | 94.93491 | 94.96979 |
| 3769.189          | 94.95671 | 94.98142 |
| 3769.671          | 94.97987 | 94.99305 |
| 3770.153          | 95.00436 | 95.00468 |
| 3770.635          | 95.03036 | 95.0163  |
| 3771.117          | 95.05769 | 95.02793 |
| 3771.6            | 95.08611 | 95.03956 |
| 3772.082          | 95.11581 | 95.05119 |
| 3772.564          | 95.14713 | 95.06281 |
| 3773.046          | 95.17931 | 95.07445 |
| 3773.528          | 95.21191 | 95.08608 |
| 3774.01           | 95.24453 | 95.09771 |
| 3774.492          | 95.27652 | 95.10933 |
| 3774.974          | 95.30807 | 95.12096 |
| 3775.457          | 95.33908 | 95.13259 |
| 3775.939          | 95.36978 | 95.14422 |
| 3776.421          | 95.40091 | 95.15585 |
| 3776.903          | 95.43095 | 95.16747 |
| 3777.385          | 95.45869 | 95.1791  |
| 3777.867          | 95.48396 | 95.19074 |
| 3778.349          | 95.50681 | 95.20236 |
| 3778.831          | 95.52534 | 95.21399 |
| 3779.313          | 95.53869 | 95.22563 |
| 3779.796          | 95.54393 | 95.23724 |
| 3780.278          | 95.53619 | 95.24888 |
| 3780.76           | 95.52052 | 95.26051 |
| 3781.242          | 95.49997 | 95.27214 |
| 3781.724          | 95.4757  | 95.28376 |
| 3782.206          | 95.44994 | 95.29539 |
| 3782.688          | 95.42251 | 95.30702 |
| 3783.17           | 95.39365 | 95.31865 |
| 3783.653          | 95.36427 | 95.33028 |
| 3784.135          | 95.33515 | 95.3419  |
| 3784.617          | 95.3069  | 95.35353 |
| 3785.099          | 95.2803  | 95.36517 |
| 3785.581          | 95.25562 | 95.37679 |
| 3786.063          | 95.23262 | 95.38842 |
| 3786.545          | 95.21346 | 95.40005 |
| 3787.027          | 95.19926 | 95.41168 |
| 3787.51           | 95.19287 | 95.4233  |
| 3787.992          | 95.19902 | 95.43494 |
| 3788.474          | 95.21319 | 95.44656 |
| 3788.956          | 95.23271 | 95.45819 |
| 3789.438          | 95.25681 | 95.46983 |
| 3789.92           | 95.28384 | 95.48145 |
| 3790.402          | 95.31377 | 95.49308 |
| 3790.884          | 95.34642 | 95.50471 |
| 3791.366          | 95.3805  | 95.51633 |
| 3791.849          | 95.41431 | 95.52796 |
| 3792.331          | 95.44897 | 95.53959 |
| 3792.813          | 95.48508 | 95.55122 |
| 3793.295          | 95.52254 | 95.56286 |
| 3793.777          | 95.56149 | 95.57448 |
| 3794.259          | 95.6019  | 95.58611 |
| 3794.741          | 95.64361 | 95.59773 |

| Wavenumber (cm-1) | After    | Before   |
|-------------------|----------|----------|
| 3795.223          | 95.68703 | 95.60937 |
| 3795.706          | 95.73302 | 95.621   |
| 3796.188          | 95.78024 | 95.63262 |
| 3796.67           | 95.82788 | 95.64425 |
| 3797.152          | 95.87527 | 95.65588 |
| 3797.634          | 95.92138 | 95.6675  |
| 3798.116          | 95.96658 | 95.67914 |
| 3798.598          | 96.01074 | 95.69077 |
| 3799.08           | 96.05431 | 95.70239 |
| 3799.563          | 96.09846 | 95.71402 |
| 3800.044          | 96.14082 | 95.72566 |
| 3800.527          | 96.17944 | 95.73728 |
| 3801.009          | 96.2141  | 95.74891 |
| 3801.491          | 96.24495 | 95.76054 |
| 3801.973          | 96.26894 | 95.77216 |
| 3802.455          | 96.28461 | 95.78379 |
| 3802.937          | 96.28724 | 95.79543 |
| 3803.419          | 96.26879 | 95.80705 |
| 3803.901          | 96.23769 | 95.81868 |
| 3804.384          | 96.19899 | 95.83032 |
| 3804.866          | 96.1548  | 95.84194 |
| 3805.348          | 96.10912 | 95.85357 |
| 3805.83           | 96.06133 | 95.8652  |
| 3806.312          | 96.01174 | 95.87683 |
| 3806.794          | 95.96139 | 95.88845 |
| 3807.276          | 95.91055 | 95.90008 |
| 3807.758          | 95.86164 | 95.91171 |
| 3808.24           | 95.81705 | 95.92334 |
| 3808.723          | 95.77722 | 95.93497 |
| 3809.205          | 95.74163 | 95.9466  |
| 3809.687          | 95.71548 | 95.95822 |
| 3810.169          | 95.70132 | 95.96986 |
| 3810.651          | 95.70657 | 95.98148 |
| 3811.133          | 95.74362 | 95.99311 |
| 3811.615          | 95.79995 | 96.00474 |
| 3812.097          | 95.86805 | 96.01637 |
| 3812.58           | 95.94512 | 96.028   |
| 3813.062          | 96.02563 | 96.03963 |
| 3813.544          | 96.1103  | 96.05126 |
| 3814.026          | 96.19868 | 96.06289 |
| 3814.508          | 96.2888  | 96.0745  |
| 3814.99           | 96.37904 | 96.08614 |
| 3815.472          | 96.46774 | 96.09777 |
| 3815.954          | 96.55284 | 96.1094  |
| 3816.437          | 96.63388 | 96.12103 |
| 3816.919          | 96.71158 | 96.13265 |
| 3817.401          | 96.78033 | 96.14428 |
| 3817.883          | 96.83733 | 96.15591 |
| 3818.365          | 96.87496 | 96.16753 |
| 3818.847          | 96.88048 | 96.17917 |
| 3819.329          | 96.86653 | 96.1908  |
| 3819.811          | 96.84063 | 96.20243 |
| 3820.293          | 96.80542 | 96.21406 |
| 3820.776          | 96.76624 | 96.22569 |
| 3821.258          | 96.72253 | 96.23731 |

| Wavenumber (cm-1) | After    | Before   |
|-------------------|----------|----------|
| 3821.74           | 96.67471 | 96.24894 |
| 3822.222          | 96.6252  | 96.26057 |
| 3822.704          | 96.57633 | 96.27219 |
| 3823.186          | 96.52859 | 96.28383 |
| 3823.668          | 96.48309 | 96.29546 |
| 3824.15           | 96.44021 | 96.30709 |
| 3824.633          | 96.39928 | 96.31871 |
| 3825.115          | 96.36456 | 96.33035 |
| 3825.597          | 96.33826 | 96.34197 |
| 3826.079          | 96.32581 | 96.3536  |
| 3826.561          | 96.33628 | 96.36523 |
| 3827.043          | 96.36098 | 96.37685 |
| 3827.525          | 96.39477 | 96.38848 |
| 3828.007          | 96.43606 | 96.40012 |
| 3828.49           | 96.48151 | 96.41174 |
| 3828.971          | 96.5313  | 96.42337 |
| 3829.454          | 96.58509 | 96.43501 |
| 3829.936          | 96.64081 | 96.44663 |
| 3830.418          | 96.69582 | 96.45826 |
| 3830.9            | 96.7514  | 96.46989 |
| 3831.382          | 96.80798 | 96.48151 |
| 3831.864          | 96.86539 | 96.49315 |
| 3832.346          | 96.92402 | 96.50477 |
| 3832.828          | 96.98273 | 96.5164  |
| 3833.311          | 97.0408  | 96.52802 |
| 3833.793          | 97.09733 | 96.53965 |
| 3834.275          | 97.1509  | 96.55129 |
| 3834.757          | 97.20232 | 96.56291 |
| 3835.239          | 97.25201 | 96.57455 |
| 3835.721          | 97.29977 | 96.58617 |
| 3836.203          | 97.34544 | 96.5978  |
| 3836.685          | 97.38921 | 96.60943 |
| 3837.167          | 97.43093 | 96.62106 |
| 3837.65           | 97.47125 | 96.63268 |
| 3838.132          | 97.51144 | 96.64431 |
| 3838.614          | 97.54951 | 96.65595 |
| 3839.096          | 97.58395 | 96.66758 |
| 3839.578          | 97.61455 | 96.67921 |
| 3840.06           | 97.64124 | 96.69083 |
| 3840.542          | 97.66206 | 96.70246 |
| 3841.024          | 97.67609 | 96.71409 |
| 3841.507          | 97.68016 | 96.72572 |
| 3841.989          | 97.66896 | 96.73734 |
| 3842.471          | 97.64803 | 96.74897 |
| 3842.953          | 97.62069 | 96.7606  |
| 3843.435          | 97.58823 | 96.77223 |
| 3843.917          | 97.55306 | 96.78386 |
| 3844.399          | 97.51506 | 96.79549 |
| 3844.881          | 97.47453 | 96.80712 |
| 3845.364          | 97.43256 | 96.81874 |
| 3845.846          | 97.39021 | 96.83038 |
| 3846.328          | 97.34792 | 96.842   |
| 3846.81           | 97.3064  | 96.85363 |
| 3847.292          | 97.26594 | 96.86527 |
| 3847.774          | 97.22636 | 96.87689 |

| Wavenumber (cm-1) | After    | Before   |
|-------------------|----------|----------|
| 3848.256          | 97.18974 | 96.88852 |
| 3848.738          | 97.15723 | 96.90015 |
| 3849.22           | 97.13152 | 96.91177 |
| 3849.703          | 97.117   | 96.9234  |
| 3850.185          | 97.10964 | 96.93504 |
| 3850.667          | 97.10707 | 96.94666 |
| 3851.149          | 97.10869 | 96.95829 |
| 3851.631          | 97.11301 | 96.96992 |
| 3852.113          | 97.12013 | 96.98155 |
| 3852.595          | 97.13    | 96.99317 |
| 3853.077          | 97.14163 | 97.0048  |
| 3853.56           | 97.15369 | 97.01643 |
| 3854.042          | 97.16708 | 97.02806 |
| 3854.524          | 97.1823  | 97.0397  |
| 3855.006          | 97.19936 | 97.05132 |
| 3855.488          | 97.21848 | 97.06295 |
| 3855.97           | 97.2395  | 97.07458 |
| 3856.452          | 97.26227 | 97.08621 |
| 3856.934          | 97.28688 | 97.09783 |
| 3857.417          | 97.31352 | 97.10946 |
| 3857.898          | 97.34181 | 97.12109 |
| 3858.381          | 97.37149 | 97.13272 |
| 3858.863          | 97.4024  | 97.14435 |
| 3859.345          | 97.43438 | 97.15598 |
| 3859.827          | 97.46729 | 97.1676  |
| 3860.309          | 97.501   | 97.17924 |
| 3860.791          | 97.5353  | 97.19087 |
| 3861.273          | 97.56995 | 97.20249 |
| 3861.755          | 97.60495 | 97.21412 |
| 3862.238          | 97.64032 | 97.22575 |
| 3862.72           | 97.67593 | 97.23737 |
| 3863.202          | 97.71168 | 97.249   |
| 3863.684          | 97.74753 | 97.26064 |
| 3864.166          | 97.78342 | 97.27226 |
| 3864.648          | 97.81941 | 97.2839  |
| 3865.13           | 97.85567 | 97.29553 |
| 3865.612          | 97.89175 | 97.30715 |
| 3866.094          | 97.92736 | 97.31878 |
| 3866.577          | 97.96221 | 97.33041 |
| 3867.059          | 97.9959  | 97.34203 |
| 3867.541          | 98.02853 | 97.35366 |
| 3868.023          | 98.06007 | 97.36529 |
| 3868.505          | 98.0907  | 97.37692 |
| 3868.987          | 98.12098 | 97.38854 |
| 3869.469          | 98.14981 | 97.40018 |
| 3869.951          | 98.17632 | 97.41181 |
| 3870.434          | 98.20036 | 97.42344 |
| 3870.916          | 98.22199 | 97.43507 |
| 3871.398          | 98.23987 | 97.44669 |
| 3871.88           | 98.25335 | 97.45832 |
| 3872.362          | 98.26031 | 97.46995 |
| 3872.844          | 98.25723 | 97.48158 |
| 3873.326          | 98.2478  | 97.49321 |
| 3873.808          | 98.23423 | 97.50484 |
| 3874.291          | 98.21738 | 97.51647 |



| Wavenumber (cm-1) | After    | Before   |
|-------------------|----------|----------|
| 3874.773          | 98.19891 | 97.5281  |
| 3875.255          | 98.17866 | 97.53973 |
| 3875.737          | 98.1568  | 97.55135 |
| 3876.219          | 98.13392 | 97.56298 |
| 3876.701          | 98.11047 | 97.57461 |
| 3877.183          | 98.0871  | 97.58624 |
| 3877.665          | 98.06447 | 97.59786 |
| 3878.147          | 98.04279 | 97.60949 |
| 3878.63           | 98.02187 | 97.62112 |
| 3879.112          | 98.00347 | 97.63275 |
| 3879.594          | 97.98849 | 97.64438 |
| 3880.076          | 97.97935 | 97.65601 |
| 3880.558          | 97.98    | 97.66764 |
| 3881.04           | 97.98657 | 97.67927 |
| 3881.522          | 97.99677 | 97.6909  |
| 3882.004          | 98.0098  | 97.70252 |
| 3882.487          | 98.02399 | 97.71415 |
| 3882.969          | 98.03965 | 97.72578 |
| 3883.451          | 98.0567  | 97.73741 |
| 3883.933          | 98.07459 | 97.74904 |
| 3884.415          | 98.0929  | 97.76066 |
| 3884.897          | 98.11116 | 97.77229 |
| 3885.379          | 98.12881 | 97.78393 |
| 3885.861          | 98.14576 | 97.79556 |
| 3886.344          | 98.16232 | 97.80718 |
| 3886.825          | 98.17681 | 97.81881 |
| 3887.308          | 98.1884  | 97.83044 |
| 3887.79           | 98.19477 | 97.84206 |
| 3888.272          | 98.19199 | 97.85369 |
| 3888.754          | 98.18411 | 97.86533 |
| 3889.236          | 98.17354 | 97.87695 |
| 3889.718          | 98.16129 | 97.88858 |
| 3890.2            | 98.14936 | 97.90022 |
| 3890.682          | 98.13725 | 97.91184 |
| 3891.165          | 98.12502 | 97.92347 |
| 3891.647          | 98.11284 | 97.9351  |
| 3892.129          | 98.10034 | 97.94672 |
| 3892.611          | 98.08929 | 97.95836 |
| 3893.093          | 98.08128 | 97.96998 |
| 3893.575          | 98.07644 | 97.98161 |
| 3894.057          | 98.07439 | 97.99324 |
| 3894.539          | 98.07831 | 98.00488 |
| 3895.021          | 98.08974 | 98.0165  |
| 3895.504          | 98.1134  | 98.02813 |
| 3895.986          | 98.15736 | 98.03975 |
| 3896.468          | 98.21313 | 98.05138 |
| 3896.95           | 98.27562 | 98.06301 |
| 3897.432          | 98.34268 | 98.07464 |
| 3897.914          | 98.41022 | 98.08627 |
| 3898.396          | 98.47896 | 98.0979  |
| 3898.878          | 98.54857 | 98.10952 |
| 3899.361          | 98.61822 | 98.12116 |
| 3899.843          | 98.68787 | 98.13278 |
| 3900.325          | 98.7547  | 98.14442 |
| 3900.807          | 98.81602 | 98.15604 |

| Wavenumber (cm-1) | After    | Before   |
|-------------------|----------|----------|
| 3901.289          | 98.87141 | 98.16767 |
| 3901.771          | 98.92143 | 98.1793  |
| 3902.253          | 98.9604  | 98.19093 |
| 3902.735          | 98.98553 | 98.20256 |
| 3903.218          | 98.98871 | 98.21419 |
| 3903.7            | 98.95612 | 98.22581 |
| 3904.182          | 98.90184 | 98.23744 |
| 3904.664          | 98.83426 | 98.24908 |
| 3905.146          | 98.75654 | 98.2607  |
| 3905.628          | 98.67494 | 98.27233 |
| 3906.11           | 98.58872 | 98.28396 |
| 3906.592          | 98.49844 | 98.29559 |
| 3907.074          | 98.40636 | 98.30721 |
| 3907.557          | 98.31432 | 98.31884 |
| 3908.039          | 98.22429 | 98.33047 |
| 3908.521          | 98.1386  | 98.3421  |
| 3909.003          | 98.05784 | 98.35372 |
| 3909.485          | 97.98128 | 98.36536 |
| 3909.967          | 97.91521 | 98.37698 |
| 3910.449          | 97.86284 | 98.38862 |
| 3910.931          | 97.83272 | 98.40025 |
| 3911.414          | 97.83913 | 98.41187 |
| 3911.896          | 97.86804 | 98.4235  |
| 3912.378          | 97.91111 | 98.43513 |
| 3912.86           | 97.9655  | 98.44676 |
| 3913.342          | 98.0254  | 98.45838 |
| 3913.824          | 98.09139 | 98.47001 |
| 3914.306          | 98.16301 | 98.48164 |
| 3914.788          | 98.23751 | 98.49327 |
| 3915.271          | 98.312   | 98.5049  |
| 3915.752          | 98.38642 | 98.51653 |
| 3916.235          | 98.45988 | 98.52816 |
| 3916.717          | 98.53204 | 98.53979 |
| 3917.199          | 98.60361 | 98.55142 |
| 3917.681          | 98.67038 | 98.56305 |
| 3918.163          | 98.73013 | 98.57467 |
| 3918.645          | 98.77765 | 98.5863  |
| 3919.127          | 98.80419 | 98.59793 |
| 3919.609          | 98.81802 | 98.60957 |
| 3920.092          | 98.82399 | 98.62119 |
| 3920.574          | 98.82362 | 98.63282 |
| 3921.056          | 98.82013 | 98.64445 |
| 3921.538          | 98.81319 | 98.65608 |
| 3922.02           | 98.80296 | 98.6677  |
| 3922.502          | 98.79122 | 98.67933 |
| 3922.984          | 98.78001 | 98.69096 |
| 3923.466          | 98.7686  | 98.70259 |
| 3923.948          | 98.7569  | 98.71421 |
| 3924.431          | 98.74498 | 98.72585 |
| 3924.913          | 98.73235 | 98.73747 |
| 3925.395          | 98.72064 | 98.74911 |
| 3925.877          | 98.71074 | 98.76073 |
| 3926.359          | 98.70444 | 98.77236 |
| 3926.841          | 98.70474 | 98.78399 |
| 3927.323          | 98.70889 | 98.79562 |

| Wavenumber (cm-1) | After    | Before   |
|-------------------|----------|----------|
| 3927.805          | 98.71527 | 98.80725 |
| 3928.288          | 98.72342 | 98.81887 |
| 3928.77           | 98.73236 | 98.8305  |
| 3929.252          | 98.74216 | 98.84213 |
| 3929.734          | 98.75278 | 98.85377 |
| 3930.216          | 98.7636  | 98.86539 |
| 3930.698          | 98.77374 | 98.87702 |
| 3931.18           | 98.78375 | 98.88865 |
| 3931.662          | 98.79389 | 98.90028 |
| 3932.145          | 98.80418 | 98.9119  |
| 3932.627          | 98.81477 | 98.92353 |
| 3933.109          | 98.82544 | 98.93025 |
| 3933.591          | 98.83606 | 98.93697 |
| 3934.073          | 98.84652 | 98.94368 |
| 3934.555          | 98.85667 | 98.9504  |
| 3935.037          | 98.86655 | 98.95712 |
| 3935.519          | 98.87619 | 98.96385 |
| 3936.001          | 98.88555 | 98.97056 |
| 3936.484          | 98.89458 | 98.97728 |
| 3936.966          | 98.90331 | 98.984   |
| 3937.448          | 98.91165 | 98.99072 |
| 3937.93           | 98.9197  | 98.99744 |
| 3938.412          | 98.92757 | 99.00415 |
| 3938.894          | 98.935   | 99.01087 |
| 3939.376          | 98.94181 | 99.01759 |
| 3939.858          | 98.94798 | 99.02431 |
| 3940.341          | 98.95345 | 99.03103 |
| 3940.823          | 98.95799 | 99.03774 |
| 3941.305          | 98.96149 | 99.04447 |
| 3941.787          | 98.96356 | 99.05119 |
| 3942.269          | 98.96358 | 99.05791 |
| 3942.751          | 98.96217 | 99.06462 |
| 3943.233          | 98.95966 | 99.07134 |
| 3943.715          | 98.9562  | 99.07806 |
| 3944.198          | 98.95198 | 99.08478 |
| 3944.679          | 98.94704 | 99.0915  |
| 3945.162          | 98.94142 | 99.09821 |
| 3945.644          | 98.93533 | 99.10494 |
| 3946.126          | 98.92909 | 99.11166 |
| 3946.608          | 98.92245 | 99.11837 |
| 3947.09           | 98.91529 | 99.1251  |
| 3947.572          | 98.90762 | 99.13181 |
| 3948.054          | 98.89945 | 99.13853 |
| 3948.536          | 98.89069 | 99.14525 |
| 3949.019          | 98.88133 | 99.15197 |
| 3949.501          | 98.87116 | 99.15868 |
| 3949.983          | 98.85978 | 99.1654  |
| 3950.465          | 98.84769 | 99.17213 |
| 3950.947          | 98.83524 | 99.17884 |
| 3951.429          | 98.8226  | 99.18556 |
| 3951.911          | 98.81004 | 99.19228 |
| 3952.393          | 98.79755 | 99.199   |
| 3952.875          | 98.78519 | 99.20571 |
| 3953.358          | 98.77302 | 99.21243 |
| 3953.84           | 98.76102 | 99.21916 |

| Wavenumber (cm-1) | After    | Before   |
|-------------------|----------|----------|
| 3954.322          | 98.74948 | 99.22587 |
| 3954.804          | 98.73866 | 99.23259 |
| 3955.286          | 98.72862 | 99.23931 |
| 3955.768          | 98.71939 | 99.24603 |
| 3956.25           | 98.71141 | 99.25274 |
| 3956.732          | 98.70494 | 99.25947 |
| 3957.215          | 98.70065 | 99.26618 |
| 3957.697          | 98.6996  | 99.2729  |
| 3958.179          | 98.70077 | 99.27962 |
| 3958.661          | 98.70352 | 99.28634 |
| 3959.143          | 98.70765 | 99.29305 |
| 3959.625          | 98.71274 | 99.29978 |
| 3960.107          | 98.71884 | 99.3065  |
| 3960.589          | 98.72592 | 99.31321 |
| 3961.072          | 98.73377 | 99.31993 |
| 3961.554          | 98.74214 | 99.32665 |
| 3962.036          | 98.75109 | 99.33337 |
| 3962.518          | 98.76059 | 99.34009 |
| 3963              | 98.77062 | 99.34681 |
| 3963.482          | 98.78125 | 99.35352 |
| 3963.964          | 98.7922  | 99.36024 |
| 3964.446          | 98.80335 | 99.36697 |
| 3964.928          | 98.8144  | 99.37368 |
| 3965.411          | 98.82481 | 99.38039 |
| 3965.893          | 98.83509 | 99.38712 |
| 3966.375          | 98.8455  | 99.39384 |
| 3966.857          | 98.85617 | 99.40055 |
| 3967.339          | 98.8673  | 99.40727 |
| 3967.821          | 98.87881 | 99.41399 |
| 3968.303          | 98.8907  | 99.42071 |
| 3968.785          | 98.90297 | 99.42743 |
| 3969.268          | 98.91557 | 99.43414 |
| 3969.75           | 98.92866 | 99.44087 |
| 3970.232          | 98.94242 | 99.44759 |
| 3970.714          | 98.95686 | 99.45431 |
| 3971.196          | 98.9719  | 99.46102 |
| 3971.678          | 98.98791 | 99.46774 |
| 3972.16           | 99.00504 | 99.47447 |
| 3972.642          | 99.02386 | 99.48118 |
| 3973.125          | 99.04529 | 99.48789 |
| 3973.606          | 99.06831 | 99.49461 |
| 3974.089          | 99.09227 | 99.50134 |
| 3974.571          | 99.11691 | 99.50806 |
| 3975.053          | 99.14172 | 99.51478 |
| 3975.535          | 99.16674 | 99.52149 |
| 3976.017          | 99.19195 | 99.52821 |
| 3976.499          | 99.21724 | 99.53493 |
| 3976.981          | 99.24261 | 99.54165 |
| 3977.463          | 99.26768 | 99.54836 |
| 3977.946          | 99.29205 | 99.55509 |
| 3978.428          | 99.31565 | 99.56181 |
| 3978.91           | 99.33855 | 99.56852 |
| 3979.392          | 99.35998 | 99.57523 |
| 3979.874          | 99.37956 | 99.58196 |
| 3980.356          | 99.3962  | 99.58868 |

| Wavenumber (cm-1) | After    | Before   |
|-------------------|----------|----------|
| 3980.838          | 99.40807 | 99.5954  |
| 3981.32           | 99.41701 | 99.60211 |
| 3981.802          | 99.42414 | 99.60883 |
| 3982.285          | 99.42986 | 99.61555 |
| 3982.767          | 99.43497 | 99.62227 |
| 3983.249          | 99.43939 | 99.62899 |
| 3983.731          | 99.44318 | 99.6357  |
| 3984.213          | 99.44662 | 99.64243 |
| 3984.695          | 99.44995 | 99.64915 |
| 3985.177          | 99.45341 | 99.65586 |
| 3985.659          | 99.45728 | 99.66258 |
| 3986.142          | 99.46167 | 99.6693  |
| 3986.624          | 99.46644 | 99.67602 |
| 3987.106          | 99.47242 | 99.68274 |
| 3987.588          | 99.48002 | 99.68946 |
| 3988.07           | 99.49036 | 99.69618 |
| 3988.552          | 99.50529 | 99.70289 |
| 3989.034          | 99.52298 | 99.70961 |
| 3989.516          | 99.54229 | 99.71633 |
| 3989.999          | 99.56289 | 99.72305 |
| 3990.481          | 99.58416 | 99.72977 |
| 3990.963          | 99.60594 | 99.73648 |
| 3991.445          | 99.62809 | 99.7432  |
| 3991.927          | 99.6499  | 99.74992 |
| 3992.409          | 99.67036 | 99.75664 |
| 3992.891          | 99.69025 | 99.76336 |
| 3993.373          | 99.70999 | 99.77008 |
| 3993.855          | 99.72968 | 99.7768  |
| 3994.338          | 99.74959 | 99.78352 |
| 3994.82           | 99.76956 | 99.79024 |
| 3995.302          | 99.78951 | 99.79695 |
| 3995.784          | 99.80944 | 99.80367 |

| Wavenumber (cm-1) | MIBWS  | Fe/S@CMIBWS | Fe/S@CMIBWS After adsorption |
|-------------------|--------|-------------|------------------------------|
| 1349              | -69    | 169222      | 864912                       |
| 1348              | -4465  | 167381      | 866599                       |
| 1347              | -10239 | 164811      | 866602                       |
| 1346              | -10140 | 162668      | 863991                       |
| 1345              | -10185 | 164268      | 862858                       |
| 1344              | -13004 | 165067      | 863010                       |
| 1343              | -16833 | 165605      | 863498                       |
| 1342              | -16298 | 163376      | 862867                       |
| 1341              | -16443 | 163320      | 862966                       |
| 1340              | -23176 | 161677      | 862585                       |
| 1339              | -19408 | 162997      | 860767                       |
| 1338              | -22477 | 165048      | 862561                       |
| 1337              | -23531 | 164493      | 861341                       |
| 1336              | -29237 | 162623      | 862078                       |
| 1335              | -28971 | 162236      | 863128                       |
| 1334              | -28839 | 159518      | 861019                       |
| 1333              | -33075 | 157632      | 858060                       |
| 1332              | -35606 | 156376      | 857437                       |
| 1331              | -35949 | 154026      | 854974                       |
| 1330              | -37707 | 152091      | 854845                       |
| 1329              | -39767 | 150363      | 852137                       |
| 1328              | -38911 | 149019      | 851911                       |
| 1327              | -42342 | 149469      | 851982                       |
| 1326              | -44041 | 148887      | 849804                       |
| 1325              | -41215 | 149303      | 847352                       |
| 1324              | -42090 | 150919      | 847580                       |
| 1323              | -41915 | 150954      | 848691                       |
| 1322              | -48241 | 148671      | 847169                       |
| 1321              | -46701 | 148064      | 845620                       |
| 1320              | -45517 | 145887      | 844101                       |
| 1319              | -53143 | 146561      | 846244                       |
| 1318              | -52567 | 148619      | 847569                       |
| 1317              | -55741 | 147957      | 847084                       |
| 1316              | -53712 | 144481      | 846715                       |
| 1315              | -55620 | 143740      | 845232                       |
| 1314              | -55120 | 146090      | 845724                       |
| 1313              | -58687 | 147895      | 844709                       |
| 1312              | -59322 | 148845      | 845529                       |
| 1311              | -59021 | 147368      | 846095                       |
| 1310              | -60056 | 145982      | 841559                       |
| 1309              | -64297 | 145009      | 841299                       |
| 1308              | -63469 | 144566      | 844039                       |
| 1307              | -63926 | 144956      | 843327                       |
| 1306              | -60933 | 143137      | 845566                       |
| 1305              | -58146 | 144882      | 844105                       |
| 1304              | -54141 | 145089      | 841402                       |
| 1303              | -48391 | 147346      | 838957                       |
| 1302              | -52560 | 148557      | 838698                       |
| 1301              | -59727 | 146629      | 838429                       |
| 1300              | -63276 | 143502      | 840293                       |
| 1299              | -63878 | 142709      | 837784                       |
| 1298              | -68597 | 143748      | 838531                       |
| 1297              | -69529 | 144961      | 840856                       |
| 1296              | -73295 | 144399      | 840926                       |
| 1295              | -76332 | 142440      | 838753                       |

|      |        |        |        |
|------|--------|--------|--------|
| 1294 | -72762 | 142694 | 838279 |
| 1293 | -77309 | 143464 | 839441 |
| 1292 | -72026 | 143108 | 839445 |
| 1291 | -77375 | 144235 | 837869 |
| 1290 | -80901 | 144604 | 837942 |
| 1289 | -81606 | 144193 | 838266 |
| 1288 | -79231 | 143553 | 837465 |
| 1287 | -83246 | 142367 | 836805 |
| 1286 | -81210 | 143828 | 835839 |
| 1285 | -78633 | 144504 | 835068 |
| 1284 | -82570 | 144635 | 836491 |
| 1283 | -82037 | 144084 | 837456 |
| 1282 | -78917 | 143569 | 837794 |
| 1281 | -82794 | 142103 | 835717 |
| 1280 | -81583 | 139176 | 836752 |
| 1279 | -83512 | 139876 | 833970 |
| 1278 | -82604 | 140079 | 836333 |
| 1277 | -82681 | 140525 | 837580 |
| 1276 | -83525 | 142914 | 836912 |
| 1275 | -84324 | 143510 | 838074 |
| 1274 | -86008 | 144204 | 837885 |
| 1273 | -87423 | 144783 | 834576 |
| 1272 | -90001 | 141812 | 834101 |
| 1271 | -88087 | 140438 | 835709 |
| 1270 | -87206 | 142605 | 834707 |
| 1269 | -88356 | 142139 | 835742 |
| 1268 | -84099 | 140887 | 837297 |
| 1267 | -86499 | 142672 | 837196 |
| 1266 | -88906 | 142681 | 835609 |
| 1265 | -89112 | 141413 | 836910 |
| 1264 | -85312 | 140983 | 836016 |
| 1263 | -87982 | 140676 | 834450 |
| 1262 | -85765 | 141995 | 836335 |
| 1261 | -88455 | 141656 | 836231 |
| 1260 | -88624 | 139509 | 834070 |
| 1259 | -85701 | 140459 | 834789 |
| 1258 | -88205 | 140848 | 835728 |
| 1257 | -85883 | 141115 | 833890 |
| 1256 | -86423 | 141149 | 835462 |
| 1255 | -87273 | 141984 | 836013 |
| 1254 | -88950 | 142141 | 835281 |
| 1253 | -89689 | 141230 | 834314 |
| 1252 | -86068 | 142917 | 833193 |
| 1251 | -87193 | 142813 | 838353 |
| 1250 | -88664 | 143530 | 838488 |
| 1249 | -85843 | 143192 | 836904 |
| 1248 | -89665 | 142567 | 837129 |
| 1247 | -85429 | 144020 | 839852 |
| 1246 | -85424 | 144996 | 840110 |
| 1245 | -85584 | 145903 | 835965 |
| 1244 | -84278 | 145407 | 838484 |
| 1243 | -85311 | 146630 | 838231 |
| 1242 | -85763 | 148469 | 838815 |
| 1241 | -86260 | 145200 | 838920 |
| 1240 | -83589 | 146878 | 841442 |
| 1239 | -86478 | 146632 | 840745 |

|      |        |        |        |
|------|--------|--------|--------|
| 1238 | -85488 | 147734 | 838551 |
| 1237 | -81701 | 147535 | 839894 |
| 1236 | -81106 | 144018 | 840483 |
| 1235 | -81644 | 146916 | 840124 |
| 1234 | -81459 | 147922 | 841559 |
| 1233 | -86102 | 149381 | 843389 |
| 1232 | -81898 | 150941 | 843929 |
| 1231 | -81123 | 150218 | 845584 |
| 1230 | -80828 | 151784 | 846100 |
| 1229 | -80267 | 153290 | 847607 |
| 1228 | -82589 | 154746 | 849943 |
| 1227 | -78314 | 154919 | 850574 |
| 1226 | -81305 | 154728 | 848434 |
| 1225 | -79614 | 153663 | 850135 |
| 1224 | -78500 | 155738 | 850363 |
| 1223 | -79085 | 154123 | 850808 |
| 1222 | -79654 | 152098 | 849865 |
| 1221 | -80043 | 149346 | 850197 |
| 1220 | -82237 | 149475 | 844088 |
| 1219 | -84477 | 146612 | 843883 |
| 1218 | -81807 | 144791 | 844970 |
| 1217 | -85604 | 142884 | 844600 |
| 1216 | -87575 | 140440 | 843935 |
| 1215 | -85638 | 138257 | 839629 |
| 1214 | -90648 | 138420 | 837806 |
| 1213 | -89068 | 135069 | 832938 |
| 1212 | -89883 | 133060 | 836223 |
| 1211 | -92910 | 131216 | 832776 |
| 1210 | -90679 | 133979 | 832120 |
| 1209 | -93438 | 134219 | 831558 |
| 1208 | -95305 | 132173 | 832107 |
| 1207 | -98578 | 133177 | 833697 |
| 1206 | -99660 | 131325 | 832231 |
| 1205 | -97987 | 129707 | 832588 |
| 1204 | -97041 | 130457 | 831402 |
| 1203 | -98098 | 129071 | 828256 |
| 1202 | -95398 | 129579 | 829830 |
| 1201 | -97935 | 129927 | 832595 |
| 1200 | -99162 | 129077 | 832499 |
| 1199 | -96780 | 128448 | 831478 |
| 1198 | -93207 | 130450 | 830983 |
| 1197 | -96432 | 130811 | 830495 |
| 1196 | -94941 | 129196 | 832613 |
| 1195 | -97765 | 130060 | 833113 |
| 1194 | -96947 | 128846 | 833034 |
| 1193 | -96087 | 127882 | 830606 |
| 1192 | -95047 | 129694 | 830827 |
| 1191 | -94617 | 130714 | 831125 |
| 1190 | -96361 | 129453 | 833983 |
| 1189 | -96850 | 127281 | 833009 |
| 1188 | -98258 | 128492 | 831986 |
| 1187 | -98304 | 130799 | 830413 |
| 1186 | -98720 | 129644 | 832206 |
| 1185 | -98940 | 130098 | 832705 |
| 1184 | -94565 | 129563 | 833254 |
| 1183 | -95725 | 128326 | 832515 |



|      |        |        |        |
|------|--------|--------|--------|
| 1182 | -98153 | 128235 | 832418 |
| 1181 | -98485 | 128458 | 831031 |
| 1180 | -96408 | 130340 | 831623 |
| 1179 | -95660 | 130369 | 833639 |
| 1178 | -96284 | 129085 | 833509 |
| 1177 | -93222 | 129904 | 831531 |
| 1176 | -96157 | 130391 | 834052 |
| 1175 | -89318 | 130691 | 833504 |
| 1174 | -89975 | 130543 | 831691 |
| 1173 | -95489 | 133231 | 833957 |
| 1172 | -95399 | 133636 | 836717 |
| 1171 | -92865 | 130530 | 837258 |
| 1170 | -95262 | 132482 | 835956 |
| 1169 | -90891 | 131928 | 834783 |
| 1168 | -90607 | 132010 | 835157 |
| 1167 | -91541 | 133646 | 837239 |
| 1166 | -90185 | 132695 | 839607 |
| 1165 | -93517 | 132961 | 839582 |
| 1164 | -90340 | 133166 | 838460 |
| 1163 | -92506 | 134167 | 840232 |
| 1162 | -91617 | 134939 | 839006 |
| 1161 | -89943 | 132602 | 838248 |
| 1160 | -90290 | 133180 | 838455 |
| 1159 | -91237 | 133295 | 839113 |
| 1158 | -91552 | 134952 | 842199 |
| 1157 | -91694 | 135425 | 841706 |
| 1156 | -90135 | 134504 | 841179 |
| 1155 | -89596 | 134880 | 840561 |
| 1154 | -87994 | 136800 | 841945 |
| 1153 | -90252 | 137853 | 843682 |
| 1152 | -89359 | 136986 | 841672 |
| 1151 | -87838 | 136928 | 841921 |
| 1150 | -88726 | 137335 | 840971 |
| 1149 | -86468 | 138099 | 840841 |
| 1148 | -86184 | 137368 | 841058 |
| 1147 | -88854 | 137059 | 842739 |
| 1146 | -88056 | 137590 | 840943 |
| 1145 | -86451 | 137804 | 840737 |
| 1144 | -86577 | 138010 | 842812 |
| 1143 | -85643 | 138109 | 843370 |
| 1142 | -84617 | 138920 | 843629 |
| 1141 | -88109 | 138037 | 845331 |
| 1140 | -86307 | 138027 | 845313 |
| 1139 | -81401 | 139256 | 843758 |
| 1138 | -83023 | 141099 | 845897 |
| 1137 | -83254 | 140564 | 845965 |
| 1136 | -81514 | 140046 | 843736 |
| 1135 | -83860 | 140394 | 846195 |
| 1134 | -82973 | 140509 | 846045 |
| 1133 | -80999 | 141531 | 846202 |
| 1132 | -82337 | 141307 | 846113 |
| 1131 | -83132 | 141934 | 845430 |
| 1130 | -82136 | 141032 | 847971 |
| 1129 | -81679 | 142783 | 846828 |
| 1128 | -79864 | 143782 | 843024 |
| 1127 | -80100 | 143371 | 844937 |

|      |        |        |        |
|------|--------|--------|--------|
| 1126 | -81208 | 143107 | 845888 |
| 1125 | -78547 | 142884 | 849454 |
| 1124 | -80319 | 142613 | 847465 |
| 1123 | -80325 | 143537 | 848239 |
| 1122 | -77241 | 143531 | 846562 |
| 1121 | -77354 | 143502 | 846732 |
| 1120 | -78125 | 143599 | 848247 |
| 1119 | -74791 | 143543 | 849909 |
| 1118 | -78837 | 143627 | 848573 |
| 1117 | -78431 | 143986 | 847621 |
| 1116 | -72569 | 145471 | 849171 |
| 1115 | -74620 | 145478 | 849842 |
| 1114 | -73979 | 145372 | 848431 |
| 1113 | -75163 | 146737 | 848330 |
| 1112 | -74813 | 147830 | 846339 |
| 1111 | -74333 | 146763 | 848577 |
| 1110 | -75119 | 146060 | 847221 |
| 1109 | -74802 | 147155 | 849790 |
| 1108 | -74910 | 150632 | 850985 |
| 1107 | -73380 | 149904 | 852741 |
| 1106 | -70954 | 149911 | 850614 |
| 1105 | -69579 | 151742 | 850660 |
| 1104 | -69849 | 152241 | 850886 |
| 1103 | -70135 | 151392 | 849535 |
| 1102 | -70811 | 149377 | 851340 |
| 1101 | -73111 | 149604 | 850371 |
| 1100 | -73380 | 150575 | 850885 |
| 1099 | -68837 | 149045 | 852118 |
| 1098 | -71336 | 151691 | 853182 |
| 1097 | -73561 | 150238 | 853862 |
| 1096 | -70645 | 150140 | 851528 |
| 1095 | -73142 | 151886 | 850938 |
| 1094 | -70661 | 150937 | 849188 |
| 1093 | -67977 | 151233 | 850989 |
| 1092 | -65705 | 152654 | 851461 |
| 1091 | -66986 | 151654 | 852167 |
| 1090 | -68296 | 150348 | 853764 |
| 1089 | -66765 | 149906 | 853019 |
| 1088 | -66975 | 151722 | 853254 |
| 1087 | -68043 | 151519 | 852394 |
| 1086 | -70514 | 151693 | 852768 |
| 1085 | -67731 | 151113 | 851350 |
| 1084 | -65940 | 151691 | 850739 |
| 1083 | -63313 | 155673 | 850541 |
| 1082 | -64552 | 154693 | 850785 |
| 1081 | -65602 | 153468 | 849735 |
| 1080 | -65201 | 153561 | 852439 |
| 1079 | -65465 | 152773 | 852498 |
| 1078 | -65623 | 154793 | 851023 |
| 1077 | -62277 | 154931 | 852028 |
| 1076 | -61872 | 155665 | 849911 |
| 1075 | -58561 | 157141 | 851504 |
| 1074 | -58287 | 157167 | 853329 |
| 1073 | -58320 | 155545 | 851390 |
| 1072 | -60324 | 153241 | 854139 |
| 1071 | -58172 | 156236 | 853618 |

|      |        |        |        |
|------|--------|--------|--------|
| 1070 | -59574 | 157771 | 852674 |
| 1069 | -58790 | 157008 | 853382 |
| 1068 | -55322 | 158667 | 853096 |
| 1067 | -56502 | 159084 | 853224 |
| 1066 | -59843 | 157164 | 855246 |
| 1065 | -58399 | 155840 | 856585 |
| 1064 | -55570 | 156069 | 856680 |
| 1063 | -58012 | 157294 | 857621 |
| 1062 | -54773 | 159546 | 856981 |
| 1061 | -54359 | 160703 | 859365 |
| 1060 | -54461 | 161480 | 859388 |
| 1059 | -50991 | 160551 | 861461 |
| 1058 | -53217 | 159534 | 860679 |
| 1057 | -54531 | 162711 | 863638 |
| 1056 | -56611 | 161208 | 862110 |
| 1055 | -50600 | 160124 | 861835 |
| 1054 | -47675 | 163138 | 860504 |
| 1053 | -49653 | 163236 | 861252 |
| 1052 | -50746 | 163958 | 863841 |
| 1051 | -46923 | 160866 | 864244 |
| 1050 | -49463 | 162224 | 863184 |
| 1049 | -49662 | 163688 | 864749 |
| 1048 | -51858 | 162274 | 862736 |
| 1047 | -45033 | 164804 | 863130 |
| 1046 | -44715 | 166781 | 864080 |
| 1045 | -45076 | 167610 | 865903 |
| 1044 | -45880 | 167040 | 865406 |
| 1043 | -43062 | 167080 | 867229 |
| 1042 | -42811 | 165437 | 869494 |
| 1041 | -40962 | 166269 | 866735 |
| 1040 | -43834 | 166071 | 869239 |
| 1039 | -44775 | 165827 | 870728 |
| 1038 | -44125 | 164733 | 869415 |
| 1037 | -39538 | 166411 | 871345 |
| 1036 | -38920 | 168222 | 872034 |
| 1035 | -42264 | 168700 | 870240 |
| 1034 | -43670 | 166576 | 871960 |
| 1033 | -41997 | 168445 | 874322 |
| 1032 | -37473 | 170968 | 874758 |
| 1031 | -34889 | 171446 | 874665 |
| 1030 | -34237 | 169735 | 875516 |
| 1029 | -37558 | 169396 | 878039 |
| 1028 | -36527 | 169021 | 875054 |
| 1027 | -36936 | 171313 | 871647 |
| 1026 | -35926 | 171927 | 874977 |
| 1025 | -33486 | 172551 | 877483 |
| 1024 | -34714 | 176434 | 876355 |
| 1023 | -31156 | 175017 | 874837 |
| 1022 | -32374 | 174272 | 875533 |
| 1021 | -31222 | 175853 | 878499 |
| 1020 | -28883 | 175522 | 879003 |
| 1019 | -26586 | 176960 | 878479 |
| 1018 | -27618 | 178229 | 878786 |
| 1017 | -23929 | 177863 | 880150 |
| 1016 | -27884 | 180209 | 879922 |
| 1015 | -19822 | 178640 | 880800 |

|      |        |        |        |
|------|--------|--------|--------|
| 1014 | -25870 | 179328 | 881105 |
| 1013 | -22340 | 180741 | 879888 |
| 1012 | -23735 | 179920 | 878555 |
| 1011 | -22184 | 178005 | 879582 |
| 1010 | -20517 | 179115 | 882407 |
| 1009 | -17811 | 178659 | 882935 |
| 1008 | -15248 | 177548 | 880708 |
| 1007 | -17605 | 179524 | 881585 |
| 1006 | -18195 | 178851 | 883748 |
| 1005 | -16838 | 181099 | 882861 |
| 1004 | -18516 | 183592 | 882987 |
| 1003 | -14427 | 183153 | 887207 |
| 1002 | -13937 | 186848 | 888705 |
| 1001 | -13166 | 188499 | 892023 |
| 1000 | -7488  | 190530 | 891063 |
| 999  | -2624  | 191988 | 889525 |
| 998  | -3958  | 190539 | 888510 |
| 997  | -5510  | 188569 | 885700 |
| 996  | -1511  | 188398 | 884774 |
| 995  | -1497  | 188904 | 878702 |
| 994  | -1240  | 187111 | 877532 |
| 993  | -3946  | 185521 | 877634 |
| 992  | -7605  | 183108 | 872710 |
| 991  | -12602 | 179945 | 872777 |
| 990  | -19080 | 177563 | 871279 |
| 989  | -21745 | 176338 | 868416 |
| 988  | -21152 | 177003 | 865674 |
| 987  | -20280 | 176060 | 863237 |
| 986  | -20466 | 175383 | 864169 |
| 985  | -25308 | 176477 | 865133 |
| 984  | -22250 | 177563 | 864513 |
| 983  | -13938 | 182392 | 868166 |
| 982  | -11690 | 186480 | 870645 |
| 981  | -7980  | 189923 | 876321 |
| 980  | 2551   | 196250 | 882305 |
| 979  | 8113   | 200426 | 886248 |
| 978  | 20453  | 203971 | 896158 |
| 977  | 26878  | 209436 | 901782 |
| 976  | 35366  | 212049 | 902058 |
| 975  | 40301  | 213296 | 899410 |
| 974  | 47852  | 207122 | 894646 |
| 973  | 41127  | 200460 | 886686 |
| 972  | 27860  | 191095 | 881597 |
| 971  | 5760   | 186458 | 875876 |
| 970  | -7338  | 182751 | 871816 |
| 969  | -17221 | 178184 | 864985 |
| 968  | -28007 | 167943 | 857033 |
| 967  | -38720 | 160741 | 851448 |
| 966  | -44909 | 155998 | 844215 |
| 965  | -51850 | 152819 | 842493 |
| 964  | -58156 | 151875 | 841144 |
| 963  | -61308 | 148914 | 842416 |
| 962  | -62995 | 145123 | 839279 |
| 961  | -63803 | 143351 | 836893 |
| 960  | -67230 | 145475 | 839792 |
| 959  | -64033 | 143599 | 837504 |

|     |        |        |        |
|-----|--------|--------|--------|
| 958 | -64580 | 142962 | 836676 |
| 957 | -64123 | 141707 | 833268 |
| 956 | -66893 | 143884 | 831773 |
| 955 | -68814 | 143674 | 830469 |
| 954 | -67129 | 142245 | 827389 |
| 953 | -66486 | 141295 | 828160 |
| 952 | -64943 | 142846 | 829221 |
| 951 | -62021 | 142998 | 827016 |
| 950 | -63600 | 141477 | 825719 |
| 949 | -62710 | 143624 | 826172 |
| 948 | -63052 | 145728 | 826049 |
| 947 | -65085 | 146052 | 825908 |
| 946 | -60387 | 145127 | 824646 |
| 945 | -62946 | 145965 | 824654 |
| 944 | -63631 | 145556 | 824889 |
| 943 | -59458 | 144760 | 822490 |
| 942 | -62437 | 146410 | 825915 |
| 941 | -59803 | 146699 | 826962 |
| 940 | -58402 | 148042 | 827269 |
| 939 | -58996 | 149401 | 827165 |
| 938 | -57261 | 147988 | 825605 |
| 937 | -54924 | 147525 | 826589 |
| 936 | -54472 | 148937 | 827825 |
| 935 | -55017 | 148187 | 826469 |
| 934 | -60319 | 147755 | 827458 |
| 933 | -56642 | 145780 | 825201 |
| 932 | -55612 | 147088 | 825225 |
| 931 | -58524 | 149711 | 825581 |
| 930 | -58597 | 151400 | 826443 |
| 929 | -57587 | 148705 | 829585 |
| 928 | -59050 | 149186 | 828486 |
| 927 | -57332 | 149097 | 827110 |
| 926 | -56173 | 150154 | 826515 |
| 925 | -54498 | 151270 | 826363 |
| 924 | -53990 | 149322 | 828164 |
| 923 | -53551 | 147910 | 829474 |
| 922 | -57127 | 146925 | 828375 |
| 921 | -59598 | 147365 | 829297 |
| 920 | -65056 | 149205 | 828018 |
| 919 | -64568 | 149306 | 830212 |
| 918 | -61987 | 150346 | 827597 |
| 917 | -63694 | 149270 | 827555 |
| 916 | -64180 | 149690 | 829662 |
| 915 | -60563 | 151806 | 827917 |
| 914 | -62447 | 149735 | 829194 |
| 913 | -59689 | 150683 | 829330 |
| 912 | -63974 | 151532 | 828989 |
| 911 | -60151 | 151452 | 826734 |
| 910 | -60212 | 150838 | 827888 |
| 909 | -60229 | 150100 | 827133 |
| 908 | -57299 | 151057 | 826690 |
| 907 | -59419 | 150483 | 826928 |
| 906 | -53177 | 150783 | 827420 |
| 905 | -51741 | 151262 | 828224 |
| 904 | -54110 | 153020 | 827683 |
| 903 | -52450 | 153870 | 824518 |

|     |         |        |        |
|-----|---------|--------|--------|
| 902 | -52305  | 154112 | 827078 |
| 901 | -51337  | 151062 | 826344 |
| 900 | -51122  | 152465 | 826285 |
| 899 | -50163  | 153595 | 826248 |
| 898 | -51903  | 154771 | 827970 |
| 897 | -53492  | 156249 | 825855 |
| 896 | -49814  | 156473 | 826990 |
| 895 | -51792  | 156174 | 828648 |
| 894 | -52423  | 155218 | 829381 |
| 893 | -53005  | 154747 | 828624 |
| 892 | -57926  | 153698 | 829307 |
| 891 | -57332  | 154528 | 828156 |
| 890 | -55542  | 155089 | 831255 |
| 889 | -61602  | 153994 | 828850 |
| 888 | -66527  | 152510 | 827746 |
| 887 | -73434  | 150426 | 827952 |
| 886 | -88712  | 149395 | 828169 |
| 885 | -96868  | 148511 | 827626 |
| 884 | -101318 | 147392 | 829256 |
| 883 | -105410 | 145318 | 827823 |
| 882 | -105259 | 144867 | 828225 |
| 881 | -107476 | 146093 | 827550 |
| 880 | -111433 | 146020 | 826845 |
| 879 | -112513 | 146142 | 828479 |
| 878 | -108154 | 145396 | 831582 |
| 877 | -114126 | 145341 | 828313 |
| 876 | -114185 | 145274 | 827369 |
| 875 | -115702 | 146120 | 826115 |
| 874 | -116753 | 147739 | 827424 |
| 873 | -118596 | 145466 | 826682 |
| 872 | -118727 | 146222 | 825792 |
| 871 | -119078 | 146435 | 824391 |
| 870 | -118570 | 144540 | 827211 |
| 869 | -118772 | 143727 | 825498 |
| 868 | -121459 | 145274 | 827425 |
| 867 | -115735 | 146662 | 827120 |
| 866 | -117705 | 145052 | 825138 |
| 865 | -117696 | 143756 | 826385 |
| 864 | -117866 | 146132 | 829012 |
| 863 | -119767 | 145935 | 827779 |
| 862 | -120997 | 145673 | 827186 |
| 861 | -118719 | 145600 | 827376 |
| 860 | -122095 | 144473 | 827653 |
| 859 | -115870 | 143876 | 824130 |
| 858 | -118588 | 145690 | 824009 |
| 857 | -115802 | 147152 | 826424 |
| 856 | -113898 | 146010 | 824627 |
| 855 | -112935 | 146368 | 824888 |
| 854 | -111368 | 146260 | 827969 |
| 853 | -109479 | 147665 | 826874 |
| 852 | -110207 | 146483 | 825216 |
| 851 | -109229 | 148759 | 822300 |
| 850 | -108117 | 149406 | 824645 |
| 849 | -104447 | 149893 | 824518 |
| 848 | -102896 | 151531 | 825350 |
| 847 | -105171 | 151491 | 824828 |

|     |         |        |        |
|-----|---------|--------|--------|
| 846 | -104456 | 150899 | 825039 |
| 845 | -104296 | 149070 | 826271 |
| 844 | -107978 | 151117 | 825518 |
| 843 | -109525 | 154035 | 825438 |
| 842 | -111438 | 151962 | 825513 |
| 841 | -111767 | 149927 | 826289 |
| 840 | -116246 | 149761 | 822352 |
| 839 | -117892 | 148068 | 822734 |
| 838 | -121527 | 146376 | 823944 |
| 837 | -126907 | 146493 | 824616 |
| 836 | -133347 | 145595 | 823684 |
| 835 | -135699 | 145289 | 823251 |
| 834 | -140739 | 144813 | 821765 |
| 833 | -152560 | 142092 | 822558 |
| 832 | -165160 | 139570 | 824172 |
| 831 | -180737 | 136984 | 821430 |
| 830 | -185715 | 137369 | 822802 |
| 829 | -190669 | 137868 | 819803 |
| 828 | -192488 | 138023 | 819096 |
| 827 | -196587 | 136274 | 820810 |
| 826 | -198727 | 135958 | 820170 |
| 825 | -202286 | 134207 | 819789 |
| 824 | -198285 | 133601 | 820796 |
| 823 | -199600 | 136037 | 818938 |
| 822 | -202147 | 137225 | 816816 |
| 821 | -204447 | 135659 | 819912 |
| 820 | -204491 | 134792 | 821205 |
| 819 | -207477 | 135339 | 820481 |
| 818 | -204654 | 135153 | 819592 |
| 817 | -207454 | 135111 | 818651 |
| 816 | -208470 | 135260 | 819046 |
| 815 | -206145 | 136007 | 819236 |
| 814 | -208689 | 136240 | 818746 |
| 813 | -208049 | 134246 | 817474 |
| 812 | -207642 | 135779 | 818635 |
| 811 | -207344 | 137378 | 820700 |
| 810 | -206683 | 138096 | 820853 |
| 809 | -206942 | 138537 | 820337 |
| 808 | -206473 | 137495 | 817243 |
| 807 | -206323 | 137417 | 818096 |
| 806 | -205162 | 136436 | 821383 |
| 805 | -206475 | 137061 | 820133 |
| 804 | -206682 | 138439 | 820443 |
| 803 | -207488 | 139016 | 821811 |
| 802 | -209317 | 138496 | 820548 |
| 801 | -206395 | 138293 | 821308 |
| 800 | -209555 | 138568 | 822538 |
| 799 | -207927 | 140339 | 822254 |
| 798 | -212361 | 139643 | 823906 |
| 797 | -209503 | 138295 | 823871 |
| 796 | -209703 | 139842 | 822938 |
| 795 | -208366 | 141253 | 822703 |
| 794 | -208563 | 140991 | 824916 |
| 793 | -204839 | 139666 | 826355 |
| 792 | -200148 | 139628 | 827077 |
| 791 | -198122 | 140971 | 825685 |

|     |         |        |        |
|-----|---------|--------|--------|
| 790 | -193050 | 142982 | 826516 |
| 789 | -188336 | 144627 | 828439 |
| 788 | -187070 | 145667 | 827516 |
| 787 | -182845 | 145295 | 829581 |
| 786 | -180896 | 145818 | 831379 |
| 785 | -176198 | 146394 | 828228 |
| 784 | -174371 | 146390 | 827090 |
| 783 | -175873 | 147271 | 830014 |
| 782 | -175145 | 147529 | 830516 |
| 781 | -178643 | 146982 | 829038 |
| 780 | -184455 | 145839 | 829416 |
| 779 | -193981 | 144130 | 828352 |
| 778 | -205505 | 141045 | 826388 |
| 777 | -212856 | 140871 | 828117 |
| 776 | -216719 | 140942 | 824200 |
| 775 | -219075 | 140710 | 825985 |
| 774 | -220162 | 138858 | 828488 |
| 773 | -222495 | 139621 | 827245 |
| 772 | -222176 | 142499 | 825747 |
| 771 | -219124 | 141515 | 824861 |
| 770 | -219343 | 141934 | 824440 |
| 769 | -220875 | 141933 | 824738 |
| 768 | -223949 | 139187 | 826001 |
| 767 | -227617 | 139083 | 828193 |
| 766 | -230044 | 139801 | 827292 |
| 765 | -234748 | 139633 | 826032 |
| 764 | -235461 | 137724 | 827003 |
| 763 | -232600 | 136744 | 826806 |
| 762 | -236127 | 137998 | 825116 |
| 761 | -235536 | 138976 | 825670 |
| 760 | -234958 | 138666 | 825869 |
| 759 | -236284 | 137101 | 827011 |
| 758 | -233719 | 137143 | 827168 |
| 757 | -233364 | 138498 | 826725 |
| 756 | -233365 | 137941 | 829465 |
| 755 | -231266 | 139201 | 830982 |
| 754 | -233858 | 140267 | 829751 |
| 753 | -231486 | 138420 | 830522 |
| 752 | -233752 | 140081 | 830243 |
| 751 | -231953 | 140700 | 828191 |
| 750 | -233135 | 139426 | 828748 |
| 749 | -233296 | 139139 | 828529 |
| 748 | -230686 | 139697 | 830642 |
| 747 | -230515 | 141118 | 830849 |
| 746 | -231625 | 142711 | 830457 |
| 745 | -232664 | 139627 | 829461 |
| 744 | -228391 | 140125 | 830686 |
| 743 | -226052 | 143373 | 833085 |
| 742 | -222241 | 143423 | 832908 |
| 741 | -223156 | 145156 | 833152 |
| 740 | -225426 | 143259 | 831730 |
| 739 | -228779 | 141905 | 830935 |
| 738 | -229968 | 142057 | 832422 |
| 737 | -231720 | 141845 | 833777 |
| 736 | -229440 | 141766 | 831974 |
| 735 | -227754 | 142399 | 831175 |



|     |           |        |        |
|-----|-----------|--------|--------|
| 734 | -223426   | 144601 | 832924 |
| 733 | -218653   | 143402 | 834347 |
| 732 | -219287   | 144793 | 833609 |
| 731 | -215403   | 146588 | 831550 |
| 730 | -215362   | 145315 | 832157 |
| 729 | -215252   | 145849 | 832370 |
| 728 | -212870   | 147351 | 834899 |
| 727 | -205881   | 149789 | 834574 |
| 726 | -197122   | 153420 | 836112 |
| 725 | -184522   | 156010 | 835061 |
| 724 | -171235   | 155652 | 837901 |
| 723 | -169298   | 153285 | 837329 |
| 722 | -183872   | 145942 | 834000 |
| 721 | -213346   | 140597 | 830841 |
| 720 | -233100   | 140651 | 832110 |
| 719 | -240585   | 142001 | 831554 |
| 718 | -244606   | 137311 | 832001 |
| 717 | -248972   | 136563 | 830492 |
| 716 | -252699   | 137073 | 830107 |
| 715 | -255624   | 137288 | 829484 |
| 714 | -249880   | 139629 | 829176 |
| 713 | -233868   | 144281 | 834357 |
| 712 | -209114   | 152157 | 837738 |
| 711 | -179651   | 158713 | 839103 |
| 710 | -157189   | 155788 | 840095 |
| 709 | -176990   | 142166 | 836027 |
| 708 | -250411   | 125674 | 828693 |
| 707 | -322182   | 118248 | 822644 |
| 706 | -363029   | 112642 | 818396 |
| 705 | -379299   | 110106 | 821202 |
| 704 | -382921.6 | 110984 | 821688 |
| 703 | -385568.2 | 109742 | 820743 |
| 702 | -385762.9 | 109324 | 822000 |
| 701 | -385046.1 | 110481 | 825449 |
| 700 | -386632.5 | 112757 | 824920 |
| 699 | -387315.7 | 112025 | 823972 |
| 698 | -386020.5 | 112813 | 826203 |
| 697 | -386632.7 | 111356 | 824395 |
| 696 | -385519.7 | 112592 | 825288 |
| 695 | -386698.4 | 113397 | 823243 |
| 694 | -388020.6 | 112971 | 822194 |
| 693 | -385961.2 | 112741 | 820157 |
| 692 | -389073.8 | 113073 | 819133 |
| 691 | -387885.7 | 114593 | 818356 |
| 690 | -386305.7 | 114212 | 817574 |
| 689 | -384582.8 | 114218 | 817272 |
| 688 | -385859   | 114399 | 817885 |
| 687 | -385940.2 | 115472 | 817764 |
| 686 | -383737.9 | 115559 | 818508 |
| 685 | -384207.1 | 114897 | 817277 |
| 684 | -385240.9 | 115735 | 819281 |
| 683 | -385689.7 | 116160 | 819205 |
| 682 | -384405.7 | 113809 | 820099 |
| 681 | -385341.4 | 113499 | 819567 |
| 680 | -385450.6 | 116100 | 818984 |
| 679 | -384988   | 115916 | 818361 |

|     |           |        |        |
|-----|-----------|--------|--------|
| 678 | -383899.4 | 114432 | 818435 |
| 677 | -384458.8 | 116439 | 818727 |
| 676 | -385312   | 116860 | 817757 |
| 675 | -386043.6 | 117025 | 819495 |
| 674 | -386170.7 | 117275 | 818493 |
| 673 | -386368.8 | 117633 | 819423 |
| 672 | -386063.4 | 118149 | 818830 |
| 671 | -384775.6 | 118673 | 818346 |
| 670 | -383691.3 | 116947 | 819252 |
| 669 | -386640.2 | 117782 | 819918 |
| 668 | -385394.6 | 118443 | 819496 |
| 667 | -384298.6 | 119321 | 818992 |
| 666 | -382372.8 | 118589 | 820964 |
| 665 | -383170.4 | 116900 | 821265 |
| 664 | -384005.2 | 118184 | 821402 |
| 663 | -384433.2 | 116901 | 820788 |
| 662 | -382481.1 | 116386 | 819982 |
| 661 | -383862.8 | 118879 | 819817 |
| 660 | -384041.3 | 119733 | 819805 |
| 659 | -383384.5 | 119151 | 820923 |
| 658 | -383733.5 | 119166 | 821195 |
| 657 | -383759.8 | 118839 | 820756 |
| 656 | -381908   | 119913 | 820807 |
| 655 | -382668.2 | 120847 | 822302 |
| 654 | -381359   | 121011 | 823599 |
| 653 | -381571   | 120210 | 823865 |
| 652 | -381978   | 118109 | 825028 |
| 651 | -382601   | 118944 | 824197 |
| 650 | -381229   | 118777 | 823478 |
| 649 | -380102   | 119284 | 821786 |
| 648 | -382012.7 | 119214 | 823356 |
| 647 | -381673   | 120819 | 824369 |
| 646 | -381733   | 122485 | 823417 |
| 645 | -379960   | 121978 | 823111 |
| 644 | -380482   | 121756 | 823226 |
| 643 | -380770   | 122351 | 824118 |
| 642 | -380588   | 123629 | 825658 |
| 641 | -379805   | 122615 | 825807 |
| 640 | -379418   | 121414 | 825602 |
| 639 | -379975   | 121661 | 826626 |
| 638 | -381085   | 120875 | 828107 |
| 637 | -382207   | 120509 | 828203 |
| 636 | -381433   | 120584 | 825781 |
| 635 | -382238.2 | 122145 | 826720 |
| 634 | -381276   | 122764 | 827663 |
| 633 | -381637   | 122093 | 829524 |
| 632 | -380976   | 123475 | 826790 |
| 631 | -381372   | 124299 | 827556 |
| 630 | -380848   | 124302 | 829278 |
| 629 | -381822   | 127477 | 829506 |
| 628 | -381775   | 127541 | 829005 |
| 627 | -382352.8 | 124127 | 828985 |
| 626 | -380211   | 123387 | 830717 |
| 625 | -379691   | 124833 | 828442 |
| 624 | -381880   | 123662 | 827954 |
| 623 | -380790   | 125313 | 830629 |

|     |         |        |        |
|-----|---------|--------|--------|
| 622 | -378617 | 124864 | 829451 |
| 621 | -377196 | 125270 | 829756 |
| 620 | -378524 | 125834 | 830861 |
| 619 | -377926 | 126635 | 831963 |
| 618 | -379257 | 127173 | 833144 |
| 617 | -379824 | 128078 | 832017 |
| 616 | -379155 | 128838 | 832374 |
| 615 | -377980 | 126597 | 831860 |
| 614 | -379132 | 125033 | 829074 |
| 613 | -378932 | 125742 | 831684 |
| 612 | -379185 | 126530 | 832947 |
| 611 | -378564 | 126950 | 830929 |
| 610 | -376426 | 125312 | 833575 |
| 609 | -378087 | 126316 | 834575 |
| 608 | -378232 | 125912 | 833098 |
| 607 | -377763 | 125463 | 834933 |
| 606 | -377678 | 126452 | 833644 |
| 605 | -377031 | 125419 | 833657 |
| 604 | -376188 | 125631 | 834477 |
| 603 | -377341 | 128163 | 834696 |
| 602 | -377537 | 128149 | 835953 |
| 601 | -377438 | 125608 | 835345 |
| 600 | -376109 | 126335 | 835199 |
| 599 | -377045 | 126371 | 836088 |
| 598 | -377071 | 126675 | 837023 |
| 597 | -375212 | 127498 | 838270 |
| 596 | -375955 | 127203 | 837248 |
| 595 | -377155 | 126395 | 835572 |
| 594 | -376764 | 128283 | 835469 |
| 593 | -374784 | 129443 | 834021 |
| 592 | -374927 | 128532 | 835725 |
| 591 | -374082 | 128429 | 835698 |
| 590 | -375060 | 126622 | 839141 |
| 589 | -373496 | 126583 | 841402 |
| 588 | -373854 | 127542 | 848238 |
| 587 | -373914 | 127772 | 857403 |
| 586 | -372464 | 128481 | 865876 |
| 585 | -372794 | 127308 | 859282 |
| 584 | -373505 | 126704 | 844736 |
| 583 | -376296 | 129717 | 835099 |
| 582 | -373554 | 128827 | 832772 |
| 581 | -373802 | 128428 | 833229 |
| 580 | -373408 | 129440 | 835547 |
| 579 | -373922 | 130223 | 842948 |
| 578 | -373404 | 132691 | 858878 |
| 577 | -371141 | 132718 | 876398 |
| 576 | -371625 | 131280 | 883139 |
| 575 | -373340 | 129045 | 860614 |
| 574 | -371679 | 130486 | 830427 |
| 573 | -371028 | 128147 | 816667 |
| 572 | -373566 | 128930 | 814243 |
| 571 | -374169 | 129817 | 812784 |
| 570 | -372497 | 127656 | 813076 |
| 569 | -372869 | 127970 | 811901 |
| 568 | -373108 | 127574 | 809678 |
| 567 | -374053 | 127170 | 809302 |

|     |           |         |          |
|-----|-----------|---------|----------|
| 566 | -373535   | 126229  | 809937   |
| 565 | -374112   | 127233  | 809724   |
| 564 | -374232   | 128413  | 811573   |
| 563 | -374281   | 127973  | 811145   |
| 562 | -374705   | 129157  | 811305   |
| 561 | -374187   | 130905  | 812769   |
| 560 | -371938   | 134312  | 816319   |
| 559 | -370770   | 136435  | 819309   |
| 558 | -369392   | 137391  | 821457   |
| 557 | -363563   | 139202  | 822929   |
| 556 | -363082   | 143133  | 822029   |
| 555 | -360325   | 145400  | 823381   |
| 554 | -356839   | 145274  | 824482   |
| 553 | -357506   | 142344  | 823579   |
| 552 | -360986   | 137575  | 819240   |
| 551 | -364867   | 133923  | 815980   |
| 550 | -369793   | 131149  | 813141   |
| 549 | -373451   | 128208  | 810510   |
| 548 | -376243   | 123720  | 807318   |
| 547 | -380935   | 120291  | 803678   |
| 546 | -384235.9 | 114047  | 798329.9 |
| 545 | -386056   | 109814  | 794878.3 |
| 544 | -388991.8 | 104742  | 791315.3 |
| 543 | -391806.6 | 100324  | 785059.6 |
| 542 | -395832   | 96022.4 | 783747.1 |
| 541 | -399393.4 | 92238.4 | 779837.9 |
| 540 | -403260.2 | 90545.6 | 775599.4 |
| 539 | -406556.4 | 86960.1 | 774563.7 |
| 538 | -408471.3 | 86010.5 | 772655.8 |
| 537 | -407564.1 | 86887.3 | 771419.1 |
| 536 | -406052.9 | 91203.1 | 772930   |
| 535 | -404815.7 | 105993  | 779343.6 |
| 534 | -392962.4 | 159548  | 808486   |
| 533 | -352055   | 287850  | 898844   |
| 532 | -269371   | 431875  | 1051040  |
| 531 | -174796   | 436475  | 1134517  |
| 530 | -91473    | 306094  | 1060535  |
| 529 | -66659    | 184679  | 910718   |
| 528 | -200390   | 113857  | 807849   |
| 527 | -366572   | 81428.1 | 765116.4 |
| 526 | -427738.2 | 68444.3 | 754482.7 |
| 525 | -438049.4 | 64229.9 | 752042.9 |
| 524 | -439571.8 | 63723.9 | 750809.8 |
| 523 | -440405.6 | 63658   | 750963   |
| 522 | -441141.2 | 62538   | 748927.5 |
| 521 | -442308.4 | 63161.1 | 747656.3 |
| 520 | -442075.7 | 62444.3 | 749115   |
| 519 | -442118.9 | 63195.9 | 747011.1 |
| 518 | -442337   | 63485.2 | 746782   |
| 517 | -442583.4 | 62125.8 | 746879.5 |
| 516 | -441929.2 | 62954.2 | 746644.3 |
| 515 | -441711.5 | 63651.1 | 746931.6 |
| 514 | -441688.8 | 64024.6 | 747595.4 |
| 513 | -442023.5 | 62802.7 | 748119.1 |
| 512 | -441773.6 | 62948.6 | 747248.9 |
| 511 | -441031.5 | 63432.3 | 748490.4 |

|     |           |         |          |
|-----|-----------|---------|----------|
| 510 | -441028.4 | 62909.8 | 748544.3 |
| 509 | -441431.2 | 61573.1 | 748078   |
| 508 | -440932   | 62188.2 | 748431.4 |
| 507 | -440601.3 | 64159.4 | 748614.4 |
| 506 | -441738.8 | 62797.7 | 747777.4 |
| 505 | -442565.8 | 63214.1 | 748472.3 |
| 504 | -441818.5 | 62701.2 | 746700.2 |
| 503 | -441928.4 | 62873.4 | 747739.5 |
| 502 | -441589.7 | 64305   | 748972.7 |
| 501 | -440985.2 | 64037   | 748815.6 |
| 500 | -441039.3 | 63785.7 | 748994.4 |
| 499 | -440923   | 64187.4 | 748891.7 |
| 498 | -441638.7 | 64196.9 | 748917.5 |
| 497 | -441899.4 | 64247.6 | 749388.3 |
| 496 | -441005.6 | 65330.4 | 748196.7 |
| 495 | -442347   | 64037.3 | 747875.3 |
| 494 | -442221.4 | 64629   | 749714.5 |
| 493 | -441450.6 | 64437.7 | 751746.9 |
| 492 | -441647.1 | 64256.3 | 749984.6 |
| 491 | -442485   | 62898   | 748916.5 |
| 490 | -442600.4 | 62828.3 | 747614.3 |
| 489 | -441759.4 | 64260.2 | 748707.3 |
| 488 | -441825.1 | 64268.6 | 749034.1 |
| 487 | -442240.6 | 63676.1 | 750144.6 |
| 486 | -441881.3 | 64012.3 | 749215.6 |
| 485 | -441397.5 | 64963.3 | 749194.1 |
| 484 | -441801.6 | 64643   | 749554.2 |
| 483 | -441295.7 | 64974.5 | 748812.8 |
| 482 | -440789.8 | 63867.1 | 748611.2 |
| 481 | -440940.5 | 63611.6 | 750218.7 |
| 480 | -441340.4 | 63471   | 749522   |
| 479 | -440789.4 | 64047.9 | 749526.2 |
| 478 | -440870.6 | 64430.9 | 749091.7 |
| 477 | -441969.3 | 64537.1 | 749787.8 |
| 476 | -441426.6 | 65206.8 | 750207.6 |
| 475 | -442209.7 | 64132.4 | 748747.5 |
| 474 | -442409.9 | 65048.7 | 749357.4 |
| 473 | -441564.7 | 64637.6 | 748660.6 |
| 472 | -440910.5 | 65077   | 749927.3 |
| 471 | -440792   | 66046.1 | 749907   |
| 470 | -441628.3 | 66833.8 | 748450.6 |
| 469 | -441026.5 | 66402.2 | 749773.4 |
| 468 | -441393.9 | 66801.3 | 750090.3 |
| 467 | -440626   | 66454.2 | 750326   |
| 466 | -441158.4 | 65397.5 | 750572   |
| 465 | -441010   | 64633   | 751662.4 |
| 464 | -440871.2 | 64717.7 | 749912.3 |
| 463 | -441416.6 | 65622.5 | 749298   |
| 462 | -441117.3 | 66095.4 | 750076.5 |
| 461 | -440505.4 | 65621.5 | 750141.3 |
| 460 | -440673.1 | 65884.4 | 750085.1 |
| 459 | -440351.2 | 66815.6 | 749689.6 |
| 458 | -439713.8 | 66509.7 | 749904.3 |
| 457 | -439882.1 | 65953.6 | 749439.9 |
| 456 | -440893   | 65870.2 | 751455   |
| 455 | -441449   | 65123.7 | 750889.8 |

|     |           |         |          |
|-----|-----------|---------|----------|
| 454 | -440216   | 66540.6 | 750697.2 |
| 453 | -440586.6 | 68597.2 | 751069.6 |
| 452 | -441165.5 | 68148.5 | 749855.2 |
| 451 | -440141.3 | 67448.1 | 750664.9 |
| 450 | -441404.4 | 66784.3 | 751329   |
| 449 | -440657.8 | 66152.2 | 751776.9 |
| 448 | -441106.3 | 66276.9 | 750131.4 |
| 447 | -440540   | 67286   | 750835.7 |
| 446 | -440592.2 | 66534.7 | 750340.7 |
| 445 | -439949.2 | 66675.1 | 752811.8 |
| 444 | -439567.8 | 66700.8 | 751168   |
| 443 | -439749.1 | 66188.7 | 751573.2 |
| 442 | -439567.1 | 65765.3 | 751336.9 |
| 441 | -439890.5 | 66767.4 | 750711.5 |
| 440 | -438664.7 | 66387.4 | 751532.3 |
| 439 | -437217.5 | 66968.5 | 751431.6 |
| 438 | -437240.3 | 66883.2 | 751928.1 |
| 437 | -438488.8 | 67068.4 | 752689.2 |
| 436 | -439423.9 | 68536.1 | 752596.1 |
| 435 | -439532.9 | 70024.1 | 750435.4 |
| 434 | -440095.6 | 68420.5 | 752466.1 |
| 433 | -439911.8 | 66635.7 | 753124   |
| 432 | -440215   | 67322.5 | 752583.8 |
| 431 | -439956.1 | 68182.9 | 752060.7 |
| 430 | -439819.2 | 67920.5 | 750819.1 |
| 429 | -440597.1 | 67051.2 | 752435.1 |
| 428 | -440200.7 | 68349   | 753495.8 |
| 427 | -440466.8 | 68879.4 | 752075.8 |
| 426 | -440329.1 | 66820.1 | 749937.7 |
| 425 | -439651.4 | 67222.2 | 752217.2 |
| 424 | -439201   | 68040.6 | 752962.2 |
| 423 | -440633.3 | 68443   | 752124.6 |
| 422 | -439294.6 | 70184.3 | 751387.1 |
| 421 | -439471.6 | 69677.8 | 751928.7 |
| 420 | -439752.6 | 66824.8 | 752289.3 |
| 419 | -439866.2 | 67595.3 | 753881.9 |
| 418 | -439798   | 68090.7 | 752302.9 |
| 417 | -438736.5 | 67077.1 | 751763.4 |
| 416 | -438304.2 | 69014.9 | 752241.7 |
| 415 | -437757.8 | 68377.5 | 750482.5 |
| 414 | -437225.3 | 66905.9 | 751953.4 |
| 413 | -437616.8 | 66119.2 | 752126.1 |
| 412 | -439243.5 | 66705.9 | 751024.7 |
| 411 | -439212.7 | 68153.3 | 750489.5 |
| 410 | -439642.6 | 67481.7 | 750288.1 |
| 409 | -439226.1 | 66597.5 | 752022.7 |
| 408 | -439660.4 | 66730.1 | 750079   |
| 407 | -439573   | 65789   | 749837   |
| 406 | -439215.6 | 67048   | 750948.5 |
| 405 | -439850.8 | 68105.9 | 751236.5 |
| 404 | -439488.7 | 68241.7 | 751585.1 |
| 403 | -439718.2 | 71516.7 | 752154.6 |
| 402 | -438714.5 | 76923.4 | 755868.6 |
| 401 | -437750.4 | 81265.4 | 759758   |
| 400 | -434843.5 | 84792.6 | 762790.1 |
| 399 | -432968.3 | 86767.7 | 767578.2 |

|     |           |         |          |
|-----|-----------|---------|----------|
| 398 | -431215.6 | 85904.7 | 766826.4 |
| 397 | -432860.4 | 77318.1 | 759053.5 |
| 396 | -435919.4 | 70739.3 | 752548.4 |
| 395 | -438032.8 | 67570   | 750718.1 |
| 394 | -439859.4 | 65674.5 | 750271.7 |
| 393 | -439694.1 | 64714.9 | 749751.3 |
| 392 | -439714.7 | 66357.3 | 749691.7 |
| 391 | -440119.8 | 66637.9 | 750935.6 |
| 390 | -440325.4 | 65555.2 | 750244.8 |
| 389 | -439800.2 | 64741.7 | 749993.7 |
| 388 | -439074   | 66912.4 | 750486.1 |
| 387 | -440417.1 | 67768.9 | 749719.1 |
| 386 | -439464.8 | 67232.6 | 750503.9 |
| 385 | -439502.6 | 67337.7 | 750605.1 |
| 384 | -439496.9 | 68827.7 | 751902.8 |
| 383 | -439057.9 | 68970.8 | 752210.8 |
| 382 | -439648.1 | 68732.5 | 750942.9 |
| 381 | -439349.4 | 69770.6 | 752016.2 |
| 380 | -438651   | 68986.1 | 750113.2 |
| 379 | -438997.1 | 67686.1 | 750759.6 |
| 378 | -438131   | 67967   | 750617   |
| 377 | -438730.4 | 68866.2 | 751160.8 |
| 376 | -439231.3 | 69606.7 | 750577.4 |
| 375 | -437860.6 | 68040.4 | 750705.9 |
| 374 | -438155.9 | 67976.6 | 751305.9 |
| 373 | -438636.6 | 69613.9 | 751092   |
| 372 | -439857.4 | 69130.8 | 751706.6 |
| 371 | -439735.2 | 68383.5 | 750972.4 |
| 370 | -439095   | 69449.1 | 751439.8 |
| 369 | -439500.6 | 69041.5 | 750957.3 |
| 368 | -439186.4 | 69747.4 | 751985.1 |
| 367 | -439680.6 | 71577.4 | 750644.4 |
| 366 | -438815.1 | 71150.9 | 752073.2 |
| 365 | -439793.5 | 71016.9 | 751090.3 |
| 364 | -439896.7 | 71236.3 | 751207.3 |
| 363 | -439656.1 | 71809.3 | 753314.6 |
| 362 | -439152.1 | 69824.1 | 753643   |
| 361 | -439661   | 69964.4 | 753363.9 |
| 360 | -439893.8 | 70314.2 | 751447.6 |
| 359 | -438386.2 | 72707.8 | 751118.4 |
| 358 | -438148.8 | 73230.9 | 752735.9 |
| 357 | -438992   | 71441.8 | 752274.1 |
| 356 | -439280.9 | 70248.5 | 752746.6 |
| 355 | -438551.3 | 71900.8 | 752821.1 |
| 354 | -438215.3 | 72750.3 | 753837.2 |
| 353 | -437213.9 | 71439.3 | 753865.3 |
| 352 | -435258.3 | 71323.1 | 753434.2 |
| 351 | -433840.1 | 71685.8 | 753162.7 |
| 350 | -433047.4 | 71638.8 | 752495.4 |
| 349 | -433380.9 | 71239.5 | 752279   |
| 348 | -433604.6 | 71862.6 | 752926.7 |
| 347 | -432562   | 71946.3 | 754962.5 |
| 346 | -430973.3 | 72291.8 | 755086.7 |
| 345 | -434638.6 | 73144.2 | 753849.9 |
| 344 | -438003.4 | 74142.5 | 754160.2 |
| 343 | -438846.9 | 72302   | 755596.5 |

|     |           |         |          |
|-----|-----------|---------|----------|
| 342 | -438963.9 | 71256.5 | 754668.3 |
| 341 | -439804.4 | 73291.7 | 754633.7 |
| 340 | -438890.5 | 72691.4 | 754741.4 |
| 339 | -438742.3 | 73127.4 | 754786.5 |
| 338 | -437805.6 | 74670.1 | 755379.3 |
| 337 | -438319.5 | 74463.5 | 754801.1 |
| 336 | -438930.6 | 75135   | 754225.2 |
| 335 | -439331.9 | 74964.1 | 754255   |
| 334 | -438393   | 74430   | 754757.9 |
| 333 | -438384.5 | 74945.8 | 755609.7 |
| 332 | -438454.5 | 74377.1 | 755309   |
| 331 | -438811   | 74126.1 | 754190.2 |
| 330 | -438634.9 | 75629.6 | 755670.5 |
| 329 | -438030.1 | 76423.1 | 756398.9 |
| 328 | -437725.3 | 75408.3 | 756004.6 |
| 327 | -437812.8 | 73568.2 | 754029.8 |
| 326 | -437840.8 | 73972.1 | 754289.8 |
| 325 | -438712.1 | 75519.7 | 756495.6 |
| 324 | -438407   | 75504.1 | 756870.7 |
| 323 | -437327.7 | 76559.9 | 757228.7 |
| 322 | -438082.4 | 77175.7 | 756588.6 |
| 321 | -437574.9 | 76833.1 | 757224.3 |
| 320 | -436690   | 76098   | 756997.5 |
| 319 | -437369.6 | 75691.8 | 756475.7 |
| 318 | -437341.3 | 76863.5 | 757528.5 |
| 317 | -437598.4 | 76703.1 | 756400.7 |
| 316 | -437070.6 | 76772.7 | 758476.4 |
| 315 | -437866.9 | 77238.9 | 759167.9 |
| 314 | -437563.8 | 77676.6 | 760130.8 |
| 313 | -438280.8 | 80645.3 | 757711.8 |
| 312 | -436992.4 | 80527.2 | 759268.6 |
| 311 | -436095.7 | 80416.8 | 759654.1 |
| 310 | -435812.8 | 80373.8 | 758476.7 |
| 309 | -434356.1 | 80089.4 | 759203.8 |
| 308 | -433179   | 82988.8 | 759307.1 |
| 307 | -431684.5 | 83168.4 | 760401.3 |
| 306 | -429865   | 81258.7 | 760930.1 |
| 305 | -428619.2 | 79700.3 | 760456   |
| 304 | -431698.4 | 76991.2 | 756929.8 |
| 303 | -434566   | 73737.8 | 755643.3 |
| 302 | -437211.1 | 71269.7 | 753459.8 |
| 301 | -437459   | 68077.1 | 750803.1 |
| 300 | -438963.5 | 65259.5 | 749112.3 |
| 299 | -439086.2 | 62785.4 | 747973.7 |
| 298 | -440065   | 59064.1 | 746584.5 |
| 297 | -439056.1 | 56855.1 | 745495.1 |
| 296 | -438604.8 | 53853.9 | 742737.8 |
| 295 | -438968   | 51431.2 | 741719.4 |
| 294 | -438595.7 | 49317.8 | 740054.6 |
| 293 | -437401.7 | 47860.5 | 738484.2 |
| 292 | -437101.5 | 46620.8 | 737724   |
| 291 | -438088   | 47207.4 | 735985.4 |
| 290 | -438921.9 | 53170.1 | 739179.4 |
| 289 | -437332.5 | 69672.4 | 747576.3 |
| 288 | -432982.9 | 102762  | 767764.8 |
| 287 | -427800.7 | 159884  | 803958   |



|     |           |         |          |
|-----|-----------|---------|----------|
| 286 | -421044.2 | 238455  | 858506   |
| 285 | -411431.6 | 278139  | 899798   |
| 284 | -400787.1 | 227097  | 874030   |
| 283 | -401627.4 | 128635  | 808425   |
| 282 | -422402.8 | 60973.6 | 750789.7 |
| 281 | -439217.2 | 39767.9 | 731907.5 |
| 280 | -443618.2 | 34094   | 728437.4 |
| 279 | -443414.8 | 32909.6 | 726278.7 |
| 278 | -443502.8 | 32650.5 | 725478.5 |
| 277 | -444557.8 | 32111.8 | 725174.1 |
| 276 | -443602.6 | 30738.8 | 726268.2 |
| 275 | -444347.3 | 31854.2 | 725359.9 |
| 274 | -443560.1 | 31743.4 | 725462.1 |
| 273 | -443322.9 | 30766.3 | 725022.5 |
| 272 | -444412.2 | 30818.7 | 725814.5 |
| 271 | -444339.4 | 31394.9 | 725933   |
| 270 | -443312.5 | 31758.7 | 725091.6 |
| 269 | -442328.2 | 31575.8 | 725090.1 |
| 268 | -441866.3 | 30761.4 | 725177.1 |
| 267 | -440961   | 30654   | 725759.3 |
| 266 | -442473.1 | 31654.9 | 725782.9 |
| 265 | -442678.5 | 31412.1 | 724838   |
| 264 | -443180.4 | 30700.7 | 725198.6 |
| 263 | -443377.3 | 29720.9 | 724669.9 |
| 262 | -442734   | 30645.4 | 725103.1 |
| 261 | -443607   | 30820.6 | 725910.3 |
| 260 | -443302.8 | 31908.2 | 725022.1 |
| 259 | -443381.1 | 32231.5 | 724616.7 |
| 258 | -442368.6 | 32700.2 | 726292.3 |
| 257 | -442969.7 | 31884.8 | 726325.7 |
| 256 | -443814.3 | 32006.4 | 726543.7 |
| 255 | -443212.2 | 32112.8 | 726151.9 |
| 254 | -443998.5 | 32398.6 | 726702.6 |
| 253 | -443676.6 | 32622.6 | 726631.6 |
| 252 | -443262.9 | 33004.1 | 725641.1 |
| 251 | -443501.7 | 34044.8 | 726101.7 |
| 250 | -442857.9 | 33210.7 | 727034.4 |
| 249 | -443901.8 | 31566   | 726540.7 |
| 248 | -441995.9 | 32280.1 | 726986.2 |
| 247 | -442620.6 | 32334   | 726742.8 |
| 246 | -442219.4 | 31317.7 | 726448   |
| 245 | -442679.3 | 31280.1 | 726394.8 |
| 244 | -442028.7 | 31299.5 | 725900.1 |
| 243 | -443081.3 | 31062.3 | 725188.2 |
| 242 | -442208.1 | 31297   | 724185.4 |
| 241 | -442946.5 | 30647.3 | 724498.9 |
| 240 | -442003.9 | 29812.7 | 727081.8 |
| 239 | -443004.3 | 29374.4 | 726328.2 |
| 238 | -443337.9 | 29301.5 | 726350.8 |
| 237 | -442883.2 | 28562.3 | 725889.7 |
| 236 | -442079.7 | 28940.3 | 725453.2 |
| 235 | -440063.7 | 29860.5 | 724753.5 |
| 234 | -437851.2 | 30014.8 | 725492.5 |
| 233 | -438741.3 | 31990.6 | 726703.3 |
| 232 | -437265.2 | 34689.6 | 729109.6 |
| 231 | -436024.6 | 36391.9 | 730957   |

|     |           |         |          |
|-----|-----------|---------|----------|
| 230 | -437375.5 | 36760.5 | 730238   |
| 229 | -440124.7 | 40122.2 | 730813.8 |
| 228 | -441682   | 46520.5 | 735499.6 |
| 227 | -443489.1 | 51228.2 | 739263.1 |
| 226 | -441749.3 | 47421   | 737364   |
| 225 | -442915.1 | 36746.4 | 730875.3 |
| 224 | -443119.9 | 30300.1 | 726487.4 |
| 223 | -442872.9 | 27585.7 | 723998.4 |
| 222 | -442567.7 | 26232.8 | 723654.8 |
| 221 | -443071.5 | 25490.4 | 723478.8 |
| 220 | -444215.5 | 25761.4 | 722883.3 |
| 219 | -442439.5 | 25198.5 | 722293   |
| 218 | -442514.9 | 25433.4 | 721531.2 |
| 217 | -443524.8 | 25167.6 | 722153.1 |
| 216 | -442781   | 25100.8 | 722759.7 |
| 215 | -443087.1 | 24962.4 | 722433.4 |
| 214 | -443037.2 | 25091.1 | 722895.1 |
| 213 | -442159.7 | 25537.8 | 722227.3 |
| 212 | -442817.5 | 25162.7 | 722338.6 |
| 211 | -442410.3 | 25317.7 | 722943.3 |
| 210 | -441484.9 | 25933.3 | 722482.6 |
| 209 | -441713.4 | 25982.7 | 721989.8 |
| 208 | -442391   | 26431.5 | 722793.1 |
| 207 | -442274.5 | 26271.9 | 722820.9 |
| 206 | -442690.8 | 24621.6 | 721557.6 |
| 205 | -442597.7 | 24619   | 721871   |
| 204 | -441503.6 | 25105.7 | 722615   |
| 203 | -442391.1 | 26241   | 722642.5 |
| 202 | -442770   | 26514   | 722783.9 |
| 201 | -441328.2 | 25734.9 | 723130.9 |
| 200 | -441272.4 | 25788.5 | 722534.5 |
| 199 | -440105.5 | 25585.1 | 723057.5 |
| 198 | -437041.2 | 25441   | 722943   |
| 197 | -437731.1 | 26713.3 | 722630.9 |
| 196 | -440074.7 | 27324.4 | 724599.7 |
| 195 | -441030.8 | 26783   | 723170.6 |
| 194 | -442414.3 | 26631.9 | 722781.1 |
| 193 | -442895.2 | 26449.7 | 722692.8 |
| 192 | -442026.3 | 27308.2 | 723045.9 |
| 191 | -441832.6 | 27457.5 | 723261.9 |
| 190 | -440911.9 | 28585.5 | 723890.2 |
| 189 | -440959.4 | 26687.9 | 723633.2 |
| 188 | -441393.5 | 27698.2 | 723045.1 |
| 187 | -440941.5 | 27971.1 | 722976   |
| 186 | -441635.7 | 28027.7 | 722649.6 |
| 185 | -441419.3 | 28084   | 723471.5 |
| 184 | -441359.8 | 28127.8 | 723107.3 |
| 183 | -440677.7 | 26521.9 | 722962.6 |
| 182 | -441667.8 | 26629.1 | 722531   |
| 181 | -441762.6 | 26150.3 | 722345.5 |
| 180 | -441522.3 | 25657.7 | 723082.7 |
| 179 | -441252.2 | 24911.8 | 722080.8 |
| 178 | -439975.3 | 24168.8 | 721723.1 |
| 177 | -440026.4 | 23815.9 | 720384.4 |
| 176 | -440704.8 | 23228.8 | 721642   |
| 175 | -440976.4 | 22198   | 721208.9 |

|     |           |         |          |
|-----|-----------|---------|----------|
| 174 | -441368.3 | 21465.4 | 720807.4 |
| 173 | -441021.8 | 20618.4 | 720049.1 |
| 172 | -441412.3 | 20830.8 | 719861.3 |
| 171 | -440716.1 | 21047.9 | 720011.6 |
| 170 | -440351.1 | 21952.2 | 719240.3 |
| 169 | -440036.2 | 25627.8 | 720909   |
| 168 | -438734.6 | 29416.8 | 726024.2 |
| 167 | -440067.5 | 30803.7 | 728940.8 |
| 166 | -441031.8 | 31306.8 | 727182.2 |
| 165 | -441255.7 | 36046.5 | 727402.1 |
| 164 | -441730.4 | 49527.4 | 734400.5 |
| 163 | -441772.8 | 58619.2 | 742874.5 |
| 162 | -441488.5 | 48737.1 | 740348.6 |
| 161 | -442250.2 | 31032.1 | 727776.5 |
| 160 | -441705   | 21133.5 | 719532.2 |
| 159 | -442474   | 18827.8 | 717510.2 |
| 158 | -441915.1 | 17546.3 | 717076   |
| 157 | -441903.3 | 17802.8 | 717069   |
| 156 | -440534.1 | 18876.4 | 717539.9 |
| 155 | -436534.5 | 18619.3 | 717233.7 |
| 154 | -430629.2 | 18964.4 | 718411.7 |
| 153 | -426668.6 | 20118.2 | 720105.1 |
| 152 | -425409.3 | 20388.9 | 719231.5 |
| 151 | -430805.9 | 19343   | 719385.9 |
| 150 | -436275.2 | 18508.8 | 717994.9 |
| 149 | -439818.8 | 17473.4 | 717641.1 |
| 148 | -439748   | 16745.2 | 716562.2 |
| 147 | -440334.8 | 16730.1 | 717276.8 |
| 146 | -441224.3 | 17013   | 717393.1 |
| 145 | -441368.8 | 16787.2 | 716874.8 |
| 144 | -441551.9 | 17091.4 | 716800.5 |
| 143 | -442090.3 | 17128.6 | 717037.4 |
| 142 | -440901.8 | 17029.1 | 716830.1 |
| 141 | -441932.6 | 16640.8 | 716289.1 |
| 140 | -441469.5 | 17173.6 | 715785.5 |
| 139 | -441535.4 | 17171.5 | 717300   |
| 138 | -440412.5 | 17355   | 717074.2 |
| 137 | -440343.6 | 17515.6 | 717428.6 |
| 136 | -440326.3 | 17454.5 | 717153.8 |
| 135 | -441328.7 | 17478.1 | 717787.3 |
| 134 | -440861.2 | 16545.4 | 718102.5 |
| 133 | -440624.4 | 17099.7 | 717344.6 |
| 132 | -439553.1 | 17637.8 | 717391.1 |
| 131 | -439331.7 | 17940.4 | 716967.1 |
| 130 | -439160.7 | 17067.7 | 718338.2 |
| 129 | -440887.6 | 17014.2 | 717148.6 |
| 128 | -441589.3 | 16975.1 | 716907.4 |
| 127 | -440965.2 | 17651.8 | 718380.9 |
| 126 | -439551.7 | 16986.7 | 718071.2 |
| 125 | -439852.6 | 16853.3 | 717551.4 |
| 124 | -439612.5 | 17490.5 | 717169.7 |
| 123 | -440623.4 | 17795   | 716946.1 |
| 122 | -439465.1 | 18159   | 717706.8 |
| 121 | -438329.7 | 18024.1 | 717743   |
| 120 | -436252.1 | 18258.4 | 717923.4 |
| 119 | -432670.1 | 18414.6 | 717793.4 |

|     |           |         |          |
|-----|-----------|---------|----------|
| 118 | -432553.6 | 18867.9 | 718841.9 |
| 117 | -433762.8 | 18544.3 | 718358.4 |
| 116 | -437573.7 | 17266.6 | 718196.8 |
| 115 | -439490.2 | 17241   | 717776   |
| 114 | -441017.6 | 17393.7 | 717471.3 |
| 113 | -442381.4 | 16512.6 | 717081.1 |
| 112 | -442258   | 16850.3 | 717343.5 |
| 111 | -443095.1 | 17125.1 | 717081.5 |
| 110 | -443498.1 | 17332.3 | 717430.5 |
| 109 | -443031.3 | 16864.1 | 717259.4 |
| 108 | -443041.7 | 16776.4 | 717410   |
| 107 | -441777.4 | 17471.3 | 717784.7 |
| 106 | -441897.5 | 18043.2 | 717712.9 |
| 105 | -439810.1 | 18043.3 | 717221.7 |
| 104 | -437343.9 | 18885.6 | 717664.5 |
| 103 | -430281.5 | 19695.4 | 717612.4 |
| 102 | -422427.3 | 21107.9 | 719663.4 |
| 101 | -420703.2 | 21018.7 | 720448.3 |
| 100 | -426326.4 | 20059.9 | 719010.1 |
| 99  | -432739.4 | 18869.1 | 718090.5 |
| 98  | -435114   | 17299   | 718168.8 |
| 97  | -437665.9 | 17367.6 | 717092.7 |
| 96  | -438254.2 | 17963.2 | 716465.9 |
| 95  | -437096   | 18493.9 | 718276.8 |
| 94  | -435007.6 | 19012.5 | 717505.1 |
| 93  | -431190.2 | 18218.3 | 718491.7 |
| 92  | -432394.2 | 17678.4 | 717770.6 |
| 91  | -435931.8 | 16572.4 | 717441.8 |
| 90  | -440921.4 | 15622.5 | 717017.8 |
| 89  | -443158.6 | 15615.4 | 716530.8 |
| 88  | -445200.8 | 15268.5 | 717071.7 |
| 87  | -446655.8 | 15196.1 | 716363   |
| 86  | -447684.9 | 15303.8 | 715782.4 |
| 85  | -448605.7 | 15338.6 | 715466.1 |
| 84  | -448242.9 | 15906.4 | 716439.3 |
| 83  | -448017.2 | 16511.2 | 716195.4 |
| 82  | -447020.9 | 15597.2 | 716082.4 |
| 81  | -447103.4 | 15677.8 | 716515.5 |
| 80  | -447076.5 | 15728.5 | 718105.2 |
| 79  | -446821.2 | 15829.2 | 718095.3 |
| 78  | -447801.8 | 15342.1 | 718000.6 |
| 77  | -447012.7 | 15167.6 | 717988.2 |
| 76  | -446722.9 | 14586.5 | 718591   |
| 75  | -445149.1 | 16045   | 720120.9 |
| 74  | -442638   | 16171.4 | 719982.4 |
| 73  | -441540.8 | 15723.4 | 718001.1 |
| 72  | -444845.5 | 15915.4 | 716133.6 |
| 71  | -447510   | 14866.4 | 714903.4 |
| 70  | -449566.4 | 14583.9 | 714545.1 |
| 69  | -450395.9 | 14958   | 714254.9 |
| 68  | -450629.9 | 15193.5 | 714356.8 |
| 67  | -451050.5 | 15333.1 | 714843.4 |
| 66  | -451141.1 | 15278.1 | 715866.5 |
| 65  | -449131.8 | 15340.9 | 715427.3 |
| 64  | -448232   | 15109.5 | 715197.4 |
| 63  | -447916.9 | 14768   | 714886.7 |

|    |            |         |           |
|----|------------|---------|-----------|
| 62 | -447500.7  | 15195   | 715319.7  |
| 61 | -448250.7  | 15157.4 | 715688.3  |
| 60 | -448166.3  | 15133.3 | 714876.8  |
| 59 | -447111.9  | 15581.5 | 715090.7  |
| 58 | -443574.6  | 17278.5 | 715898.5  |
| 57 | -438251.3  | 20183.1 | 717803.8  |
| 56 | -427205.1  | 21853.6 | 719236.1  |
| 55 | -415719    | 21631.4 | 719785.8  |
| 54 | -416764.1  | 17455.2 | 718182.3  |
| 53 | -435435.9  | 13411.1 | 714409.9  |
| 52 | -454417.6  | 11109.3 | 713084.3  |
| 51 | -465330.9  | 9938.54 | 712030.4  |
| 50 | -468972.1  | 10042.7 | 712336.6  |
| 49 | -470062.3  | 10689.2 | 712462    |
| 48 | -470787.7  | 10702.2 | 712641.4  |
| 47 | -470322.1  | 10536   | 713330.3  |
| 46 | -471006.9  | 9986.6  | 714527.8  |
| 45 | -471427.1  | 9251.93 | 715813    |
| 44 | -471490.2  | 9225.82 | 719029.3  |
| 43 | -471132.3  | 8965.33 | 720648    |
| 42 | -472055.21 | 9469.98 | 715704.3  |
| 41 | -472304.44 | 8995.1  | 710635.5  |
| 40 | -472469.23 | 8730.96 | 708913.62 |
| 39 | -472764.02 | 8852.38 | 708183.43 |
| 38 | -472910.08 | 8430.62 | 707985.15 |
| 37 | -472880.55 | 8110.86 | 708079.51 |
| 36 | -472816.21 | 8329.41 | 707138.12 |
| 35 | -473124.07 | 7858.24 | 706726.47 |
| 34 | -473545.59 | 8131.21 | 707044.16 |
| 33 | -473551.77 | 8414.74 | 707560.98 |
| 32 | -473263.65 | 8628.98 | 706984.07 |
| 31 | -473131.34 | 9242.88 | 707171.75 |
| 30 | -473319.9  | 9542.67 | 707650.58 |
| 29 | -473317.62 | 10587.2 | 707754.17 |
| 28 | -472483.38 | 12260.5 | 709251.08 |
| 27 | -471067.5  | 13499.6 | 711539.7  |
| 26 | -469551.9  | 15358   | 713697.9  |
| 25 | -468086.4  | 17135.5 | 715003    |
| 24 | -465327.3  | 15742.2 | 715269.2  |
| 23 | -464257.7  | 13157.6 | 714524.5  |
| 22 | -462996.7  | 11167.1 | 712468.7  |
| 21 | -462394    | 9644.21 | 710178.3  |
| 20 | -466155.7  | 9262    | 708038.49 |
| 19 | -471009.7  | 9030.91 | 706397.55 |
| 18 | -473546.33 | 8896.14 | 706426.97 |
| 17 | -474684.9  | 8638.35 | 707017.92 |
| 16 | -475545.12 | 8376.45 | 706968.52 |
| 15 | -475532.29 | 8664.79 | 706321.25 |
| 14 | -475188.19 | 8297.22 | 705918.43 |
| 13 | -474731.76 | 8376.91 | 706358.6  |
| 12 | -474504.12 | 7991.83 | 706752.01 |
| 11 | -474258.01 | 7827.01 | 706480.51 |
| 10 | -474616.23 | 7644.7  | 706518.83 |
| 9  | -474128.24 | 7432.3  | 706331.45 |
| 8  | -472864.47 | 7141.19 | 706101.88 |
| 7  | -471125    | 7724.41 | 706431.18 |

|     |              |         |             |
|-----|--------------|---------|-------------|
| 6   | -469850.7    | 7482.34 | 706988.77   |
| 5   | -468485.3    | 7277.12 | 707613.57   |
| 4   | -468994.7    | 6865.59 | 707102.73   |
| 3   | -470026.5    | 5496.41 | 705606.16   |
| 2   | -472834.11   | 3430.55 | 704455.45   |
| 1   | -475879.29   | 1866.37 | 702938.57   |
| 0   | -479125.48   | 807.834 | 700982.52   |
| -1  | -480925.9    | 366.924 | 700193      |
| -2  | -481595.954  | 231.82  | 700122.153  |
| -3  | -481926.2285 | 132.412 | 700110.37   |
| -4  | -481960.5654 | 150.973 | 700129.497  |
| -5  | -481974.2429 | 101.787 | 700071.8598 |
| -6  | -481991.7155 | 103.696 | 700083.2001 |
| -7  | -481998.1949 | 124.705 | 700082.8944 |
| -8  | -481982.2185 | 87.0936 | 700066.2239 |
| -9  | -481987.7695 | 109.062 | 700130.426  |
| -10 | -481981.8828 | 150.56  | 700068.7404 |
| -11 | -481999.9144 | 154.946 | 700043.8751 |

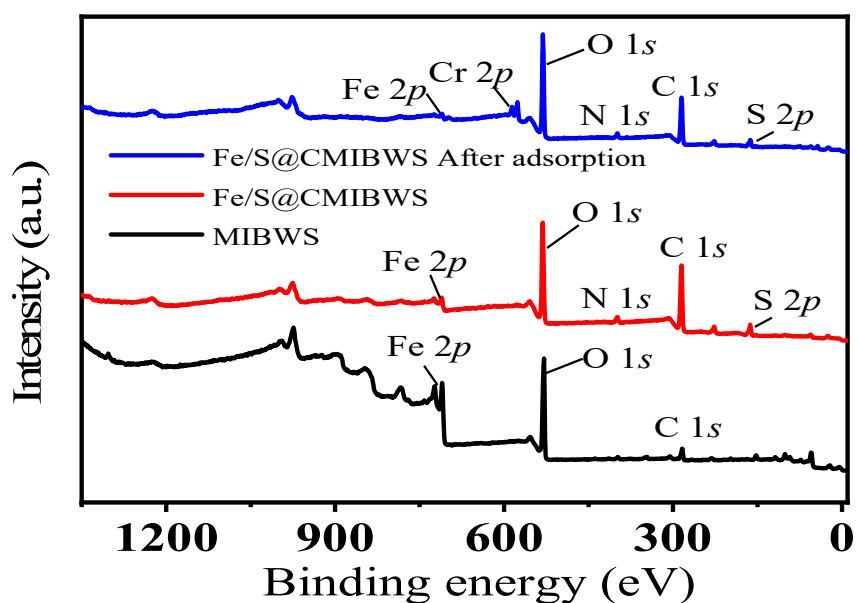

| Binding energy (eV) | Intensity (a.u.) |         |         |         |         |         |
|---------------------|------------------|---------|---------|---------|---------|---------|
|                     | LineA            | LineB   | LineC   | LineD   | LineE   | LineF   |
| 297.2               | 3719.94          | 3740.42 | 3740.42 | 3740.42 | 3740.42 | 3740.42 |
| 297.1               | 3674.9           | 3701.16 | 3701.16 | 3701.16 | 3701.16 | 3701.16 |
| 297                 | 3775.16          | 3672.49 | 3672.49 | 3672.49 | 3672.49 | 3672.49 |
| 296.9               | 3754.44          | 3651.07 | 3651.07 | 3651.07 | 3651.07 | 3651.07 |
| 296.8               | 3637.99          | 3649.8  | 3649.8  | 3649.8  | 3649.8  | 3649.8  |
| 296.7               | 3570.04          | 3643.82 | 3643.82 | 3643.82 | 3643.82 | 3643.82 |
| 296.6               | 3617.68          | 3626.27 | 3626.27 | 3626.27 | 3626.27 | 3626.27 |
| 296.5               | 3622.84          | 3608.37 | 3608.37 | 3608.37 | 3608.37 | 3608.37 |
| 296.4               | 3486.66          | 3587.84 | 3587.84 | 3587.84 | 3587.84 | 3587.84 |
| 296.3               | 3675.64          | 3572.62 | 3572.62 | 3572.62 | 3572.62 | 3572.62 |
| 296.2               | 3730.02          | 3562.17 | 3562.17 | 3562.17 | 3562.17 | 3562.17 |
| 296.1               | 3530.15          | 3549.04 | 3549.04 | 3549.04 | 3549.04 | 3549.04 |
| 296                 | 3518.3           | 3536.75 | 3536.75 | 3536.75 | 3536.75 | 3536.75 |
| 295.9               | 3485.95          | 3530.57 | 3530.57 | 3530.57 | 3530.57 | 3530.57 |
| 295.8               | 3525.29          | 3526.51 | 3526.51 | 3526.51 | 3526.51 | 3526.51 |
| 295.7               | 3563.77          | 3505.62 | 3505.62 | 3505.62 | 3505.62 | 3505.62 |
| 295.6               | 3428.17          | 3476.42 | 3476.42 | 3476.42 | 3476.42 | 3476.42 |
| 295.5               | 3414.86          | 3454.45 | 3454.45 | 3454.45 | 3454.45 | 3454.45 |
| 295.4               | 3477.47          | 3445.89 | 3445.89 | 3445.89 | 3445.89 | 3445.89 |
| 295.3               | 3441.98          | 3441.98 | 3441.98 | 3441.98 | 3441.98 | 3441.98 |
| 295.2               | 3445.81          | 3412.57 | 3412.57 | 3412.57 | 3412.57 | 3412.57 |
| 295.1               | 3408.85          | 3381.71 | 3381.71 | 3381.71 | 3381.71 | 3381.71 |
| 295                 | 3288.48          | 3367.21 | 3367.21 | 3367.21 | 3367.21 | 3367.21 |
| 294.9               | 3424.2           | 3343.16 | 3343.16 | 3343.16 | 3343.16 | 3343.16 |
| 294.8               | 3442.92          | 3324.08 | 3324.08 | 3324.08 | 3324.08 | 3324.08 |
| 294.7               | 3201.72          | 3309.5  | 3309.5  | 3309.5  | 3309.5  | 3309.5  |
| 294.6               | 3224.36          | 3282.2  | 3282.2  | 3282.2  | 3282.2  | 3282.2  |
| 294.5               | 3268.61          | 3254.22 | 3254.22 | 3254.23 | 3254.22 | 3254.23 |
| 294.4               | 3150.35          | 3230.66 | 3230.66 | 3230.67 | 3230.66 | 3230.67 |
| 294.3               | 3267.55          | 3192.64 | 3192.64 | 3192.65 | 3192.64 | 3192.65 |
| 294.2               | 3281.61          | 3154.19 | 3154.19 | 3154.21 | 3154.19 | 3154.21 |
| 294.1               | 3145.51          | 3137.71 | 3137.71 | 3137.74 | 3137.71 | 3137.74 |
| 294                 | 3101.11          | 3124.42 | 3124.42 | 3124.46 | 3124.42 | 3124.46 |
| 293.9               | 3029.29          | 3100    | 3100    | 3100.04 | 3100    | 3100.04 |
| 293.8               | 3005.95          | 3081.13 | 3081.13 | 3081.19 | 3081.13 | 3081.19 |
| 293.7               | 3020.05          | 3060.12 | 3060.12 | 3060.19 | 3060.12 | 3060.19 |
| 293.6               | 3020.45          | 3029.91 | 3029.91 | 3030.02 | 3029.91 | 3030.02 |
| 293.5               | 3078.17          | 3005.61 | 3005.61 | 3005.74 | 3005.61 | 3005.74 |
| 293.4               | 2999.9           | 2986.07 | 2986.07 | 2986.24 | 2986.07 | 2986.24 |
| 293.3               | 2942.87          | 2969.67 | 2969.67 | 2969.9  | 2969.67 | 2969.9  |
| 293.2               | 3036.37          | 2963.03 | 2963.03 | 2963.32 | 2963.03 | 2963.32 |
| 293.1               | 2949.39          | 2959.85 | 2959.85 | 2960.22 | 2959.85 | 2960.22 |
| 293                 | 2878.12          | 2949.39 | 2949.39 | 2949.87 | 2949.39 | 2949.87 |
| 292.9               | 2886.19          | 2931.97 | 2931.97 | 2932.6  | 2931.97 | 2932.6  |
| 292.8               | 2848.91          | 2928.42 | 2928.42 | 2929.22 | 2928.42 | 2929.22 |
| 292.7               | 2932.91          | 2927.73 | 2927.73 | 2928.76 | 2927.73 | 2928.76 |
| 292.6               | 2985.03          | 2924.66 | 2924.66 | 2925.96 | 2924.66 | 2925.96 |
| 292.5               | 2905.41          | 2922.69 | 2922.69 | 2924.34 | 2922.69 | 2924.34 |
| 292.4               | 2886.63          | 2919.66 | 2919.66 | 2921.75 | 2919.66 | 2921.75 |
| 292.3               | 2960.81          | 2914.86 | 2914.86 | 2917.5  | 2914.86 | 2917.5  |
| 292.2               | 2997.82          | 2909.8  | 2909.8  | 2913.11 | 2909.8  | 2913.11 |
| 292.1               | 2953.78          | 2902.31 | 2902.31 | 2906.46 | 2902.31 | 2906.46 |
| 292                 | 2944.45          | 2891.55 | 2891.55 | 2896.73 | 2891.55 | 2896.73 |
| 291.9               | 2884.09          | 2880.37 | 2880.37 | 2886.82 | 2880.37 | 2886.82 |

| Binding energy (eV) | Intensity (a.u.) |         |         |         |         |         |
|---------------------|------------------|---------|---------|---------|---------|---------|
|                     | LineA            | LineB   | LineC   | LineD   | LineE   | LineF   |
| 291.8               | 2826.59          | 2868.45 | 2868.45 | 2876.47 | 2868.45 | 2876.47 |
| 291.7               | 2855.98          | 2853.73 | 2853.73 | 2863.64 | 2853.73 | 2863.64 |
| 291.6               | 2947.74          | 2839.91 | 2839.91 | 2852.13 | 2839.91 | 2852.13 |
| 291.5               | 2881.18          | 2827.53 | 2827.53 | 2842.56 | 2827.53 | 2842.56 |
| 291.4               | 2810.34          | 2816.76 | 2816.76 | 2835.19 | 2816.76 | 2835.19 |
| 291.3               | 2857.07          | 2812.16 | 2812.16 | 2834.67 | 2812.16 | 2834.67 |
| 291.2               | 2791.62          | 2811.51 | 2811.51 | 2838.92 | 2811.51 | 2838.92 |
| 291.1               | 2823.46          | 2810.9  | 2810.9  | 2844.18 | 2810.9  | 2844.18 |
| 291                 | 2791.22          | 2810.84 | 2810.84 | 2851.11 | 2810.84 | 2851.11 |
| 290.9               | 2650.69          | 2810.79 | 2810.79 | 2859.36 | 2810.79 | 2859.36 |
| 290.8               | 2716.09          | 2810.71 | 2810.71 | 2869.12 | 2810.71 | 2869.12 |
| 290.7               | 2819.53          | 2810.62 | 2810.62 | 2880.62 | 2810.62 | 2880.62 |
| 290.6               | 2830.92          | 2810.51 | 2810.51 | 2894.15 | 2810.51 | 2894.15 |
| 290.5               | 2955.64          | 2810.39 | 2810.39 | 2909.99 | 2810.39 | 2909.99 |
| 290.4               | 3073.1           | 2810.25 | 2810.25 | 2928.48 | 2810.25 | 2928.48 |
| 290.3               | 2989.34          | 2810.08 | 2810.08 | 2949.98 | 2810.08 | 2949.98 |
| 290.2               | 2958.35          | 2809.87 | 2809.87 | 2974.86 | 2809.87 | 2974.86 |
| 290.1               | 2991.5           | 2809.61 | 2809.61 | 3003.56 | 2809.61 | 3003.56 |
| 290                 | 2986.84          | 2809.31 | 2809.31 | 3036.56 | 2809.31 | 3036.56 |
| 289.9               | 3017.81          | 2808.97 | 2808.98 | 3074.36 | 2808.97 | 3074.36 |
| 289.8               | 3112.75          | 2808.6  | 2808.61 | 3117.5  | 2808.6  | 3117.51 |
| 289.7               | 3198.78          | 2808.2  | 2808.22 | 3166.55 | 2808.2  | 3166.57 |
| 289.6               | 3225.43          | 2807.76 | 2807.8  | 3222.08 | 2807.76 | 3222.11 |
| 289.5               | 3186.1           | 2807.26 | 2807.32 | 3284.67 | 2807.26 | 3284.73 |
| 289.4               | 3236.57          | 2806.71 | 2806.8  | 3354.93 | 2806.71 | 3355.02 |
| 289.3               | 3366.42          | 2806.06 | 2806.21 | 3433.42 | 2806.06 | 3433.57 |
| 289.2               | 3432.2           | 2805.27 | 2805.52 | 3520.7  | 2805.27 | 3520.95 |
| 289.1               | 3485.1           | 2804.36 | 2804.76 | 3617.33 | 2804.36 | 3617.73 |
| 289                 | 3576.11          | 2803.31 | 2803.95 | 3723.81 | 2803.31 | 3724.45 |
| 288.9               | 3903.2           | 2802.11 | 2803.11 | 3840.59 | 2802.11 | 3841.6  |
| 288.8               | 4323.72          | 2800.76 | 2802.32 | 3968.02 | 2800.76 | 3969.59 |
| 288.7               | 4409.72          | 2799.22 | 2801.63 | 4106.34 | 2799.22 | 4108.75 |
| 288.6               | 4527.83          | 2797.48 | 2801.16 | 4255.63 | 2797.48 | 4259.33 |
| 288.5               | 4692.8           | 2795.51 | 2801.09 | 4415.86 | 2795.5  | 4421.44 |
| 288.4               | 4694.97          | 2793.3  | 2801.66 | 4586.78 | 2793.29 | 4595.16 |
| 288.3               | 5032.97          | 2790.86 | 2803.26 | 4767.99 | 2790.85 | 4780.42 |
| 288.2               | 5403.26          | 2788.19 | 2806.4  | 4958.83 | 2788.17 | 4977.1  |
| 288.1               | 5666.01          | 2785.31 | 2811.79 | 5158.41 | 2785.26 | 5184.99 |
| 288                 | 5835.52          | 2782.21 | 2820.35 | 5365.55 | 2782.12 | 5403.86 |
| 287.9               | 5854.48          | 2778.86 | 2833.26 | 5578.76 | 2778.72 | 5633.43 |
| 287.8               | 6221.11          | 2775.24 | 2852.09 | 5796.29 | 2775.03 | 5873.56 |
| 287.7               | 6512.83          | 2771.36 | 2878.82 | 6016.1  | 2771.02 | 6124.24 |
| 287.6               | 6651.38          | 2767.24 | 2916.04 | 6235.91 | 2766.7  | 6385.79 |
| 287.5               | 7126.49          | 2762.9  | 2966.9  | 6453.19 | 2762.04 | 6658.9  |
| 287.4               | 7552.41          | 2758.37 | 3035.28 | 6665.22 | 2757.04 | 6944.79 |
| 287.3               | 7768.03          | 2753.75 | 3125.85 | 6869.12 | 2751.7  | 7245.33 |
| 287.2               | 8126.48          | 2749.1  | 3244.1  | 7061.89 | 2745.97 | 7563.16 |
| 287.1               | 8627.08          | 2744.55 | 3396.34 | 7240.52 | 2739.82 | 7901.78 |
| 287                 | 9012.22          | 2740.29 | 3589.69 | 7402.03 | 2733.21 | 8265.6  |
| 286.9               | 9232.98          | 2736.58 | 3831.95 | 7543.57 | 2726.08 | 8659.94 |
| 286.8               | 9587.42          | 2733.82 | 4131.39 | 7662.56 | 2718.41 | 9090.95 |
| 286.7               | 10304.6          | 2732.57 | 4496.42 | 7756.74 | 2710.19 | 9565.34 |
| 286.6               | 11016.9          | 2733.58 | 4935.02 | 7824.18 | 2701.39 | 10090   |
| 286.5               | 11685.5          | 2737.8  | 5454.14 | 7863.41 | 2691.93 | 10671.5 |



| Binding energy (eV) | Intensity (a.u.) |         |         |         |         |         |
|---------------------|------------------|---------|---------|---------|---------|---------|
|                     | LineA            | LineB   | LineC   | LineD   | LineE   | LineF   |
| 286.4               | 12416.7          | 2746.49 | 6058.86 | 7873.46 | 2681.79 | 11315.2 |
| 286.3               | 12929.3          | 2761.29 | 6751.5  | 7853.93 | 2670.92 | 12024.9 |
| 286.2               | 13499            | 2784.25 | 7530.46 | 7804.92 | 2659.28 | 12801.1 |
| 286.1               | 14435            | 2817.93 | 8389.22 | 7727.08 | 2646.81 | 13640.6 |
| 286                 | 15381.5          | 2865.51 | 9315.47 | 7621.66 | 2633.52 | 14535.6 |
| 285.9               | 16011.1          | 2930.82 | 10290.3 | 7490.39 | 2619.46 | 15472.6 |
| 285.8               | 16801.8          | 3018.29 | 11287.8 | 7335.37 | 2604.6  | 16432.3 |
| 285.7               | 17747.5          | 3133.03 | 12275.8 | 7159.05 | 2588.94 | 17390   |
| 285.6               | 18169.6          | 3280.72 | 13216.8 | 6964.12 | 2572.47 | 18316.7 |
| 285.5               | 18603.1          | 3467.56 | 14069.9 | 6753.47 | 2555.18 | 19180.5 |
| 285.4               | 19419.3          | 3700.11 | 14794.2 | 6530.15 | 2537.18 | 19950.1 |
| 285.3               | 20117.7          | 3984.9  | 15351.7 | 6297.21 | 2518.5  | 20596.8 |
| 285.2               | 20933.3          | 4328.07 | 15711.1 | 6057.67 | 2499.27 | 21098.3 |
| 285.1               | 21274.3          | 4734.74 | 15851   | 5814.38 | 2479.55 | 21441   |
| 285                 | 21453.1          | 5208.37 | 15762.1 | 5570.02 | 2459.42 | 21621.7 |
| 284.9               | 21757.6          | 5750.03 | 15448.7 | 5327.05 | 2438.97 | 21647.9 |
| 284.8               | 21405.5          | 6357.57 | 14927.7 | 5087.73 | 2418.34 | 21536.3 |
| 284.7               | 21381            | 7024.76 | 14226.9 | 4854.03 | 2397.64 | 21310.4 |
| 284.6               | 21596.1          | 7740.56 | 13382.2 | 4627.61 | 2376.97 | 20996.4 |
| 284.5               | 21172.8          | 8488.78 | 12434.2 | 4409.92 | 2356.51 | 20619.8 |
| 284.4               | 20213.1          | 9247.88 | 11424.1 | 4202.06 | 2336.34 | 20201.3 |
| 284.3               | 19849.6          | 9991.53 | 10391.2 | 4004.88 | 2316.57 | 19754.5 |
| 284.2               | 19553.4          | 10689.8 | 9370.19 | 3819.03 | 2297.33 | 19284.4 |
| 284.1               | 18699.3          | 11310.9 | 8389.6  | 3644.85 | 2278.66 | 18788   |
| 284                 | 18180.7          | 11823.5 | 7471.19 | 3482.51 | 2260.64 | 18256   |
| 283.9               | 17346            | 12199.9 | 6629.99 | 3332.07 | 2243.39 | 17675.1 |
| 283.8               | 16281.8          | 12418   | 5874.78 | 3193.37 | 2226.96 | 17032.3 |
| 283.7               | 15533.5          | 12464.5 | 5208.95 | 3066.11 | 2211.36 | 16316.8 |
| 283.6               | 14756.6          | 12335.7 | 4631.63 | 2949.91 | 2196.64 | 15523.9 |
| 283.5               | 13861            | 12038.3 | 4138.72 | 2844.34 | 2182.86 | 14655.7 |
| 283.4               | 12884.9          | 11588.6 | 3723.91 | 2748.87 | 2170.03 | 13721.3 |
| 283.3               | 11789.5          | 11010.7 | 3379.51 | 2662.97 | 2158.2  | 12736.7 |
| 283.2               | 10960.8          | 10333.7 | 3097.22 | 2586.04 | 2147.37 | 11722.2 |
| 283.1               | 10149.2          | 9589.38 | 2868.62 | 2517.45 | 2137.52 | 10700.4 |
| 283                 | 9106.16          | 8809.39 | 2685.64 | 2456.59 | 2128.66 | 9694.3  |
| 282.9               | 8198.32          | 8022.8  | 2540.8  | 2402.87 | 2120.76 | 8724.97 |
| 282.8               | 7279.3           | 7254.67 | 2427.38 | 2355.66 | 2113.77 | 7810.17 |
| 282.7               | 6474.34          | 6525.04 | 2339.47 | 2314.38 | 2107.65 | 6963.58 |
| 282.6               | 5735.25          | 5848.63 | 2272.02 | 2278.44 | 2102.35 | 6194.38 |
| 282.5               | 5127.78          | 5235.04 | 2220.77 | 2247.31 | 2097.81 | 5507.5  |
| 282.4               | 4714.41          | 4689.3  | 2182.21 | 2220.49 | 2093.98 | 4904.05 |
| 282.3               | 4186.56          | 4212.53 | 2153.45 | 2197.47 | 2090.76 | 4381.95 |
| 282.2               | 3687.72          | 3802.88 | 2132.18 | 2177.79 | 2088.07 | 3936.73 |
| 282.1               | 3364.5           | 3456.32 | 2116.58 | 2161.03 | 2085.84 | 3562.26 |
| 282                 | 3126.97          | 3167.35 | 2105.2  | 2146.81 | 2083.99 | 3251.39 |
| 281.9               | 3002.5           | 2929.71 | 2096.94 | 2134.76 | 2082.44 | 2996.52 |
| 281.8               | 2893.6           | 2736.82 | 2090.96 | 2124.58 | 2081.16 | 2790.06 |
| 281.7               | 2709.98          | 2582.24 | 2086.66 | 2116.02 | 2080.09 | 2624.74 |
| 281.6               | 2668.58          | 2459.84 | 2083.55 | 2108.83 | 2079.19 | 2493.84 |
| 281.5               | 2698.99          | 2364.07 | 2081.3  | 2102.8  | 2078.44 | 2391.3  |
| 281.4               | 2572.97          | 2289.97 | 2079.65 | 2097.76 | 2077.79 | 2311.8  |
| 281.3               | 2535.92          | 2233.27 | 2078.42 | 2093.53 | 2077.22 | 2250.78 |
| 281.2               | 2468.93          | 2190.35 | 2077.49 | 2090.01 | 2076.72 | 2204.4  |
| 281.1               | 2322.42          | 2158.21 | 2076.77 | 2087.07 | 2076.28 | 2169.48 |

| Binding energy (eV) | Intensity (a.u.) |         |         |         |         |         |
|---------------------|------------------|---------|---------|---------|---------|---------|
|                     | LineA            | LineB   | LineC   | LineD   | LineE   | LineF   |
| 281                 | 2290.34          | 2134.37 | 2076.2  | 2084.62 | 2075.89 | 2143.4  |
| 280.9               | 2286.13          | 2116.88 | 2075.73 | 2082.58 | 2075.54 | 2124.1  |
| 280.8               | 2318.27          | 2104.16 | 2075.34 | 2080.89 | 2075.23 | 2109.94 |
| 280.7               | 2282.56          | 2095    | 2075.02 | 2079.48 | 2074.95 | 2099.61 |
| 280.6               | 2264.19          | 2088.45 | 2074.73 | 2078.31 | 2074.68 | 2092.11 |
| 280.5               | 2285.5           | 2083.79 | 2074.47 | 2077.33 | 2074.44 | 2086.71 |
| 280.4               | 2261.1           | 2080.5  | 2074.22 | 2076.5  | 2074.21 | 2082.81 |
| 280.3               | 2309.68          | 2078.17 | 2073.99 | 2075.8  | 2073.98 | 2080    |
| 280.2               | 2312.25          | 2076.54 | 2073.78 | 2075.21 | 2073.78 | 2077.98 |
| 280.1               | 2283.9           | 2075.4  | 2073.6  | 2074.72 | 2073.59 | 2076.53 |
| 280                 | 2259.07          | 2074.58 | 2073.41 | 2074.29 | 2073.41 | 2075.47 |
| 279.9               | 2158.15          | 2073.98 | 2073.23 | 2073.92 | 2073.23 | 2074.67 |
| 279.8               | 2102.35          | 2073.53 | 2073.05 | 2073.59 | 2073.05 | 2074.07 |
| 279.7               | 2108             | 2073.19 | 2072.89 | 2073.31 | 2072.89 | 2073.6  |
| 279.6               | 2245.13          | 2072.93 | 2072.75 | 2073.07 | 2072.75 | 2073.26 |
| 279.5               | 2292.23          | 2072.75 | 2072.63 | 2072.88 | 2072.63 | 2073    |
| 279.4               | 2209.45          | 2072.6  | 2072.53 | 2072.73 | 2072.53 | 2072.79 |
| 279.3               | 2134.85          | 2072.48 | 2072.44 | 2072.59 | 2072.44 | 2072.63 |
| 279.2               | 2077.8           | 2072.37 | 2072.35 | 2072.46 | 2072.35 | 2072.49 |
| 279.1               | 2071.41          | 2072.27 | 2072.25 | 2072.34 | 2072.25 | 2072.35 |
| 279                 | 2124.58          | 2072.18 | 2072.17 | 2072.23 | 2072.17 | 2072.24 |
| 278.9               | 2180.2           | 2072.1  | 2072.09 | 2072.14 | 2072.09 | 2072.15 |
| 278.8               | 2170.19          | 2072.04 | 2072.03 | 2072.07 | 2072.03 | 2072.07 |
| 278.7               | 2104.8           | 2071.99 | 2071.99 | 2072.02 | 2071.99 | 2072.02 |
| 278.6               | 2036.13          | 2071.95 | 2071.95 | 2071.97 | 2071.95 | 2071.97 |
| 278.5               | 2024.47          | 2071.9  | 2071.9  | 2071.91 | 2071.9  | 2071.92 |

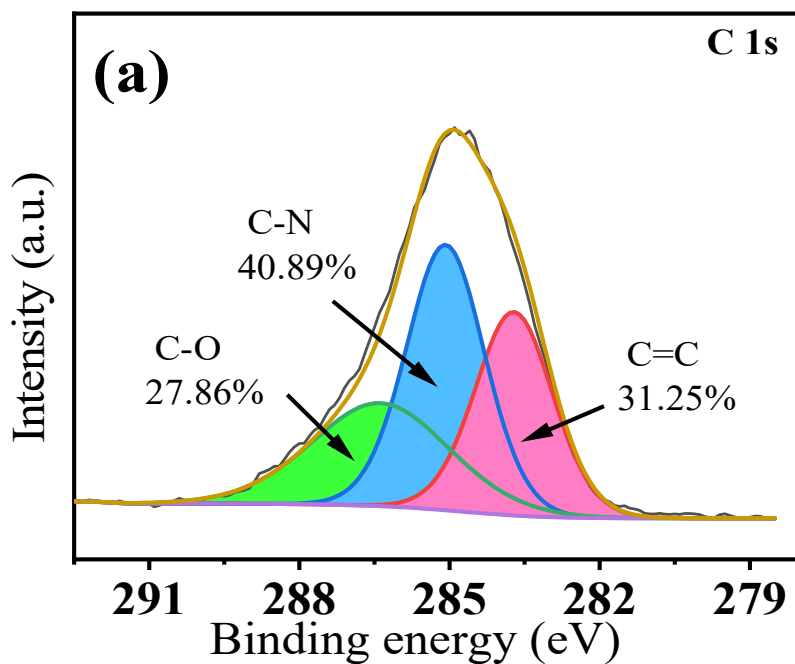

| Binding energy (eV) | Intensity (a.u.) |         |         |         |         |         |
|---------------------|------------------|---------|---------|---------|---------|---------|
|                     | LineA            | LineB   | LineC   | LineD   | LineE   | LineF   |
| 297.1               | 2958.14          | 2982.45 | 2982.45 | 2982.45 | 2982.45 | 2982.45 |
| 297                 | 2878.34          | 2980.3  | 2980.3  | 2980.3  | 2980.3  | 2980.3  |
| 296.9               | 3027.19          | 2977.51 | 2977.51 | 2977.51 | 2977.51 | 2977.51 |
| 296.8               | 3021.78          | 2974.16 | 2974.16 | 2974.16 | 2974.16 | 2974.16 |
| 296.7               | 2930.5           | 2961.21 | 2961.21 | 2961.21 | 2961.21 | 2961.21 |
| 296.6               | 2932.15          | 2951.92 | 2951.92 | 2951.92 | 2951.92 | 2951.92 |
| 296.5               | 2990.02          | 2942.14 | 2942.14 | 2942.14 | 2942.14 | 2942.14 |
| 296.4               | 2996.24          | 2941.27 | 2941.27 | 2941.27 | 2941.27 | 2941.27 |
| 296.3               | 2926.86          | 2925.01 | 2925.01 | 2925.01 | 2925.01 | 2925.01 |
| 296.2               | 2868.98          | 2907.92 | 2907.92 | 2907.92 | 2907.92 | 2907.92 |
| 296.1               | 2909.5           | 2906.24 | 2906.24 | 2906.24 | 2906.24 | 2906.24 |
| 296                 | 2881.98          | 2901.19 | 2901.19 | 2901.19 | 2901.19 | 2901.19 |
| 295.9               | 2919.03          | 2894.59 | 2894.59 | 2894.59 | 2894.59 | 2894.59 |
| 295.8               | 2854.32          | 2889.99 | 2889.99 | 2889.99 | 2889.99 | 2889.99 |
| 295.7               | 2777.55          | 2875.71 | 2875.71 | 2875.71 | 2875.71 | 2875.71 |
| 295.6               | 2911.97          | 2865.9  | 2865.9  | 2865.9  | 2865.9  | 2865.9  |
| 295.5               | 2876.7           | 2853.09 | 2853.09 | 2853.09 | 2853.09 | 2853.09 |
| 295.4               | 2917.37          | 2841.98 | 2841.98 | 2841.98 | 2841.98 | 2841.98 |
| 295.3               | 2945.69          | 2829.97 | 2829.97 | 2829.97 | 2829.97 | 2829.97 |
| 295.2               | 2769.75          | 2818.2  | 2818.2  | 2818.2  | 2818.2  | 2818.2  |
| 295.1               | 2761             | 2814.81 | 2814.81 | 2814.81 | 2814.81 | 2814.81 |
| 295                 | 2768.64          | 2798.41 | 2798.41 | 2798.41 | 2798.41 | 2798.41 |
| 294.9               | 2759.82          | 2778.35 | 2778.35 | 2778.35 | 2778.35 | 2778.35 |
| 294.8               | 2786.91          | 2754.86 | 2754.86 | 2754.86 | 2754.86 | 2754.86 |
| 294.7               | 2724.86          | 2723.44 | 2723.44 | 2723.44 | 2723.44 | 2723.44 |
| 294.6               | 2740.26          | 2701.55 | 2701.55 | 2701.55 | 2701.55 | 2701.55 |
| 294.5               | 2731.52          | 2683.68 | 2683.68 | 2683.68 | 2683.68 | 2683.68 |
| 294.4               | 2656.07          | 2667    | 2667    | 2667    | 2667    | 2667    |
| 294.3               | 2658.93          | 2656.93 | 2656.93 | 2656.93 | 2656.93 | 2656.93 |
| 294.2               | 2600.11          | 2635.3  | 2635.3  | 2635.3  | 2635.3  | 2635.3  |
| 294.1               | 2528.96          | 2610.39 | 2610.39 | 2610.39 | 2610.39 | 2610.39 |
| 294                 | 2564.46          | 2597.19 | 2597.19 | 2597.19 | 2597.19 | 2597.19 |
| 293.9               | 2585.09          | 2587.94 | 2587.94 | 2587.94 | 2587.94 | 2587.94 |
| 293.8               | 2649.06          | 2582.72 | 2582.72 | 2582.72 | 2582.72 | 2582.72 |
| 293.7               | 2548.97          | 2571.18 | 2571.18 | 2571.18 | 2571.18 | 2571.18 |
| 293.6               | 2450.84          | 2561.79 | 2561.79 | 2561.79 | 2561.79 | 2561.79 |
| 293.5               | 2595.09          | 2559.56 | 2559.56 | 2559.56 | 2559.56 | 2559.56 |
| 293.4               | 2629.77          | 2555.74 | 2555.74 | 2555.74 | 2555.74 | 2555.74 |
| 293.3               | 2598.58          | 2544.59 | 2544.59 | 2544.59 | 2544.59 | 2544.59 |
| 293.2               | 2532.05          | 2525.79 | 2525.79 | 2525.79 | 2525.79 | 2525.79 |
| 293.1               | 2496.84          | 2520.16 | 2520.16 | 2520.16 | 2520.16 | 2520.16 |
| 293                 | 2504.37          | 2515.44 | 2515.44 | 2515.45 | 2515.44 | 2515.45 |
| 292.9               | 2522.45          | 2496.1  | 2496.1  | 2496.11 | 2496.1  | 2496.11 |
| 292.8               | 2462.43          | 2483.1  | 2483.1  | 2483.11 | 2483.1  | 2483.11 |
| 292.7               | 2442.29          | 2471.35 | 2471.35 | 2471.37 | 2471.35 | 2471.37 |
| 292.6               | 2487.07          | 2456.82 | 2456.82 | 2456.84 | 2456.82 | 2456.84 |
| 292.5               | 2398.91          | 2453.64 | 2453.64 | 2453.67 | 2453.64 | 2453.67 |
| 292.4               | 2382.37          | 2453.06 | 2453.06 | 2453.11 | 2453.06 | 2453.11 |
| 292.3               | 2486.77          | 2440.77 | 2440.77 | 2440.84 | 2440.77 | 2440.84 |
| 292.2               | 2469.34          | 2433.98 | 2433.98 | 2434.08 | 2433.98 | 2434.08 |
| 292.1               | 2372.15          | 2433.57 | 2433.57 | 2433.71 | 2433.57 | 2433.71 |
| 292                 | 2461.9           | 2431.19 | 2431.19 | 2431.38 | 2431.19 | 2431.38 |
| 291.9               | 2505.2           | 2428.91 | 2428.91 | 2429.17 | 2428.91 | 2429.17 |
| 291.8               | 2384.18          | 2426.04 | 2426.04 | 2426.4  | 2426.04 | 2426.4  |

| Binding energy (eV) | Intensity (a.u.) |         |         |         |         |         |
|---------------------|------------------|---------|---------|---------|---------|---------|
|                     | LineA            | LineB   | LineC   | LineD   | LineE   | LineF   |
| 291.7               | 2383.63          | 2418.99 | 2418.99 | 2419.48 | 2418.99 | 2419.48 |
| 291.6               | 2481.49          | 2410.29 | 2410.29 | 2410.96 | 2410.29 | 2410.96 |
| 291.5               | 2449.81          | 2401.1  | 2401.1  | 2402.01 | 2401.1  | 2402.01 |
| 291.4               | 2379.91          | 2390.94 | 2390.94 | 2392.17 | 2390.94 | 2392.17 |
| 291.3               | 2455.22          | 2385.67 | 2385.67 | 2387.31 | 2385.67 | 2387.31 |
| 291.2               | 2454.87          | 2385.62 | 2385.62 | 2387.81 | 2385.62 | 2387.81 |
| 291.1               | 2394.23          | 2385.56 | 2385.56 | 2388.47 | 2385.56 | 2388.47 |
| 291                 | 2309.73          | 2385.49 | 2385.49 | 2389.34 | 2385.49 | 2389.34 |
| 290.9               | 2235.34          | 2385.42 | 2385.42 | 2390.48 | 2385.42 | 2390.48 |
| 290.8               | 2313.99          | 2385.36 | 2385.36 | 2391.98 | 2385.36 | 2391.98 |
| 290.7               | 2450.38          | 2385.28 | 2385.28 | 2393.91 | 2385.28 | 2393.91 |
| 290.6               | 2512.59          | 2385.22 | 2385.22 | 2396.4  | 2385.22 | 2396.4  |
| 290.5               | 2443.56          | 2385.16 | 2385.16 | 2399.59 | 2385.16 | 2399.59 |
| 290.4               | 2443.93          | 2385.09 | 2385.09 | 2403.62 | 2385.09 | 2403.62 |
| 290.3               | 2435.6           | 2385    | 2385    | 2408.68 | 2385    | 2408.68 |
| 290.2               | 2368.1           | 2384.88 | 2384.88 | 2415    | 2384.88 | 2415    |
| 290.1               | 2392.36          | 2384.75 | 2384.75 | 2422.86 | 2384.75 | 2422.86 |
| 290                 | 2479.93          | 2384.61 | 2384.61 | 2432.61 | 2384.61 | 2432.61 |
| 289.9               | 2479.28          | 2384.47 | 2384.47 | 2444.61 | 2384.47 | 2444.61 |
| 289.8               | 2470.8           | 2384.3  | 2384.3  | 2459.3  | 2384.3  | 2459.3  |
| 289.7               | 2478.27          | 2384.12 | 2384.12 | 2477.19 | 2384.12 | 2477.19 |
| 289.6               | 2449.86          | 2383.91 | 2383.91 | 2498.83 | 2383.91 | 2498.83 |
| 289.5               | 2600.39          | 2383.65 | 2383.65 | 2524.86 | 2383.65 | 2524.86 |
| 289.4               | 2591.22          | 2383.34 | 2383.35 | 2555.98 | 2383.34 | 2555.98 |
| 289.3               | 2584.01          | 2383    | 2383    | 2593.01 | 2383    | 2593.01 |
| 289.2               | 2693.42          | 2382.59 | 2382.59 | 2636.78 | 2382.59 | 2636.78 |
| 289.1               | 2796.47          | 2382.12 | 2382.12 | 2688.23 | 2382.12 | 2688.23 |
| 289                 | 2799.72          | 2381.6  | 2381.6  | 2748.34 | 2381.59 | 2748.34 |
| 288.9               | 2802.16          | 2381    | 2381.01 | 2818.12 | 2381    | 2818.13 |
| 288.8               | 3008.22          | 2380.33 | 2380.35 | 2898.6  | 2380.33 | 2898.62 |
| 288.7               | 3012.4           | 2379.57 | 2379.6  | 2990.81 | 2379.57 | 2990.85 |
| 288.6               | 2930.25          | 2378.69 | 2378.73 | 3095.7  | 2378.67 | 3095.77 |
| 288.5               | 3050.3           | 2377.66 | 2377.74 | 3214.17 | 2377.64 | 3214.3  |
| 288.4               | 3239.54          | 2376.48 | 2376.64 | 3347    | 2376.45 | 3347.22 |
| 288.3               | 3394.63          | 2375.14 | 2375.42 | 3494.77 | 2375.09 | 3495.15 |
| 288.2               | 3668.32          | 2373.61 | 2374.12 | 3657.82 | 2373.53 | 3658.48 |
| 288.1               | 3938.01          | 2371.88 | 2372.77 | 3836.19 | 2371.76 | 3837.33 |
| 288                 | 4093.91          | 2369.96 | 2371.49 | 4029.55 | 2369.76 | 4031.48 |
| 287.9               | 4264.05          | 2367.82 | 2370.42 | 4237.13 | 2367.51 | 4240.36 |
| 287.8               | 4524.59          | 2365.46 | 2369.8  | 4457.65 | 2364.97 | 4462.95 |
| 287.7               | 4823.11          | 2362.88 | 2370.02 | 4689.29 | 2362.14 | 4697.9  |
| 287.6               | 4903.41          | 2360.14 | 2371.67 | 4929.66 | 2359.01 | 4943.44 |
| 287.5               | 5102.25          | 2357.28 | 2375.63 | 5175.8  | 2355.58 | 5197.54 |
| 287.4               | 5518.84          | 2354.37 | 2383.14 | 5424.11 | 2351.85 | 5457.92 |
| 287.3               | 5730.72          | 2351.53 | 2395.9  | 5670.47 | 2347.79 | 5722.32 |
| 287.2               | 5961.82          | 2348.89 | 2416.28 | 5910.3  | 2343.4  | 5988.67 |
| 287.1               | 6211.61          | 2346.66 | 2447.43 | 6138.67 | 2338.67 | 6255.42 |
| 287                 | 6563.44          | 2345.14 | 2493.5  | 6350.51 | 2333.62 | 6521.92 |
| 286.9               | 6804.67          | 2344.69 | 2559.74 | 6540.68 | 2328.22 | 6788.68 |
| 286.8               | 7100.89          | 2345.79 | 2652.65 | 6704.29 | 2322.45 | 7057.84 |
| 286.7               | 7413.76          | 2349.09 | 2780.06 | 6836.89 | 2316.31 | 7333.43 |
| 286.6               | 7540.01          | 2355.41 | 2951.05 | 6934.67 | 2309.78 | 7621.58 |
| 286.5               | 7833.42          | 2365.79 | 3175.65 | 6994.66 | 2302.82 | 7930.47 |
| 286.4               | 8245.8           | 2381.49 | 3464.4  | 7014.88 | 2295.37 | 8270.03 |

| Binding energy (eV) | Intensity (a.u.) |         |         |         |         |         |
|---------------------|------------------|---------|---------|---------|---------|---------|
|                     | LineA            | LineB   | LineC   | LineD   | LineE   | LineF   |
| 286.3               | 8669.8           | 2404.15 | 3827.52 | 6994.49 | 2287.41 | 8651.33 |
| 286.2               | 9046.78          | 2435.75 | 4273.73 | 6933.82 | 2278.9  | 9085.5  |
| 286.1               | 9570.21          | 2478.66 | 4808.7  | 6834.34 | 2269.8  | 9582.1  |
| 286                 | 10358.9          | 2535.67 | 5433.12 | 6698.55 | 2260.04 | 10147.3 |
| 285.9               | 10944.8          | 2609.98 | 6140.67 | 6529.82 | 2249.52 | 10781.4 |
| 285.8               | 11437.6          | 2705.33 | 6916.25 | 6332.35 | 2238.2  | 11477.5 |
| 285.7               | 12079.6          | 2825.91 | 7734.54 | 6110.9  | 2226.11 | 12219.1 |
| 285.6               | 13002.1          | 2976.2  | 8559.68 | 5870.47 | 2213.22 | 12979.9 |
| 285.5               | 14095.5          | 3160.94 | 9346.68 | 5616.18 | 2199.51 | 13724.8 |
| 285.4               | 14491.1          | 3384.92 | 10044.8 | 5353.08 | 2185.03 | 14412.7 |
| 285.3               | 14858.2          | 3652.77 | 10602.7 | 5086.02 | 2169.91 | 15001.7 |
| 285.2               | 15482.6          | 3968.51 | 10975.1 | 4819.38 | 2154.22 | 15454.5 |
| 285.1               | 15900.1          | 4335.13 | 11129.3 | 4557    | 2138.05 | 15745.3 |
| 285                 | 16104.8          | 4754.18 | 11050.5 | 4302.19 | 2121.46 | 15863.9 |
| 284.9               | 15793.9          | 5225.23 | 10744.2 | 4057.73 | 2104.64 | 15817.9 |
| 284.8               | 15576.8          | 5745.32 | 10235.7 | 3825.82 | 2087.77 | 15631.3 |
| 284.7               | 15559.3          | 6308.3  | 9565.33 | 3607.98 | 2070.92 | 15339.8 |
| 284.6               | 15420.9          | 6904.55 | 8782.58 | 3405.24 | 2054.18 | 14984   |
| 284.5               | 14881.4          | 7520.83 | 7939.44 | 3218.21 | 2037.68 | 14603.1 |
| 284.4               | 14374.6          | 8140.23 | 7084.22 | 3047.03 | 2021.49 | 14228.5 |
| 284.3               | 14117.8          | 8742.69 | 6257.38 | 2891.49 | 2005.67 | 13880.2 |
| 284.2               | 13741.4          | 9305.84 | 5489.22 | 2751.11 | 1990.24 | 13565.7 |
| 284.1               | 13271.9          | 9806.28 | 4799.53 | 2625.18 | 1975.21 | 13280.6 |
| 284                 | 12966.3          | 10221.2 | 4198.45 | 2512.83 | 1960.61 | 13011.3 |
| 283.9               | 12817.5          | 10530.4 | 3688.27 | 2413.15 | 1946.46 | 12738.9 |
| 283.8               | 12284.9          | 10717.7 | 3265.37 | 2325.13 | 1932.79 | 12442.6 |
| 283.7               | 11915.2          | 10772.7 | 2922.22 | 2247.74 | 1919.62 | 12103.4 |
| 283.6               | 11800.6          | 10691.9 | 2649.14 | 2179.99 | 1906.99 | 11707   |
| 283.5               | 11281.1          | 10478.9 | 2435.57 | 2120.89 | 1894.9  | 11245.5 |
| 283.4               | 10605.4          | 10144   | 2271.15 | 2069.51 | 1883.39 | 10717.9 |
| 283.3               | 9937.66          | 9703.56 | 2146.33 | 2025.02 | 1872.49 | 10129.9 |
| 283.2               | 9363.7           | 9177.88 | 2052.74 | 1986.65 | 1862.28 | 9492.7  |
| 283.1               | 8905.88          | 8589.82 | 1983.26 | 1953.7  | 1852.8  | 8821.19 |
| 283                 | 8201.77          | 7962.81 | 1932.11 | 1925.54 | 1844.07 | 8132.32 |
| 282.9               | 7524.62          | 7319.33 | 1894.71 | 1901.64 | 1836.18 | 7443.31 |
| 282.8               | 6784.82          | 6679.48 | 1867.44 | 1881.44 | 1829.11 | 6770.14 |
| 282.7               | 5953.64          | 6060.19 | 1847.55 | 1864.44 | 1822.81 | 6126.56 |
| 282.6               | 5208.99          | 5474.82 | 1832.99 | 1850.23 | 1817.27 | 5523.5  |
| 282.5               | 4549.45          | 4933.02 | 1822.29 | 1838.41 | 1812.44 | 4968.84 |
| 282.4               | 4147.46          | 4441.02 | 1814.39 | 1828.67 | 1808.31 | 4467.46 |
| 282.3               | 3801.19          | 4001.9  | 1808.51 | 1820.7  | 1804.81 | 4021.48 |
| 282.2               | 3387.01          | 3616.16 | 1804.09 | 1814.21 | 1801.87 | 3630.7  |
| 282.1               | 3172.58          | 3282.29 | 1800.73 | 1808.96 | 1799.43 | 3293.12 |
| 282                 | 2819.57          | 2997.28 | 1798.15 | 1804.72 | 1797.4  | 3005.37 |
| 281.9               | 2682.76          | 2757.13 | 1796.13 | 1801.31 | 1795.7  | 2763.18 |
| 281.8               | 2693.42          | 2557.26 | 1794.52 | 1798.55 | 1794.28 | 2561.78 |
| 281.7               | 2498.23          | 2392.89 | 1793.23 | 1796.33 | 1793.1  | 2396.27 |
| 281.6               | 2354.75          | 2259.26 | 1792.2  | 1794.57 | 1792.13 | 2261.77 |
| 281.5               | 2285.73          | 2151.79 | 1791.36 | 1793.15 | 1791.32 | 2153.66 |
| 281.4               | 2181.38          | 2066.28 | 1790.67 | 1792.02 | 1790.65 | 2067.67 |
| 281.3               | 2030.56          | 1998.94 | 1790.09 | 1791.1  | 1790.08 | 1999.97 |
| 281.2               | 1974.82          | 1946.45 | 1789.6  | 1790.35 | 1789.6  | 1947.2  |
| 281.1               | 1974.74          | 1905.94 | 1789.2  | 1789.75 | 1789.19 | 1906.49 |
| 281                 | 1991.01          | 1874.96 | 1788.85 | 1789.25 | 1788.84 | 1875.37 |

| Binding energy (eV) | Intensity (a.u.) |         |         |         |         |         |
|---------------------|------------------|---------|---------|---------|---------|---------|
|                     | LineA            | LineB   | LineC   | LineD   | LineE   | LineF   |
| 280.9               | 1944.25          | 1851.52 | 1788.55 | 1788.85 | 1788.55 | 1851.82 |
| 280.8               | 1922.47          | 1833.95 | 1788.31 | 1788.53 | 1788.31 | 1834.16 |
| 280.7               | 2010.09          | 1820.9  | 1788.12 | 1788.27 | 1788.12 | 1821.05 |
| 280.6               | 2025.96          | 1811.29 | 1787.94 | 1788.06 | 1787.94 | 1811.4  |
| 280.5               | 1842.42          | 1804.26 | 1787.79 | 1787.86 | 1787.79 | 1804.34 |
| 280.4               | 1833.32          | 1799.16 | 1787.64 | 1787.7  | 1787.64 | 1799.22 |
| 280.3               | 1833.17          | 1795.5  | 1787.51 | 1787.55 | 1787.51 | 1795.54 |
| 280.2               | 1792.64          | 1792.89 | 1787.39 | 1787.42 | 1787.39 | 1792.91 |
| 280.1               | 1870.82          | 1791.03 | 1787.29 | 1787.31 | 1787.29 | 1791.05 |
| 280                 | 1859.92          | 1789.73 | 1787.2  | 1787.22 | 1787.2  | 1789.74 |
| 279.9               | 1849.54          | 1788.83 | 1787.14 | 1787.15 | 1787.14 | 1788.84 |
| 279.8               | 1831.8           | 1788.2  | 1787.08 | 1787.08 | 1787.08 | 1788.2  |
| 279.7               | 1825.37          | 1787.75 | 1787.01 | 1787.02 | 1787.01 | 1787.75 |
| 279.6               | 1818.16          | 1787.42 | 1786.94 | 1786.94 | 1786.94 | 1787.42 |
| 279.5               | 1852.08          | 1787.17 | 1786.86 | 1786.86 | 1786.86 | 1787.17 |
| 279.4               | 1834.85          | 1786.99 | 1786.79 | 1786.8  | 1786.79 | 1786.99 |
| 279.3               | 1841.18          | 1786.88 | 1786.75 | 1786.75 | 1786.75 | 1786.88 |
| 279.2               | 1906.98          | 1786.79 | 1786.71 | 1786.71 | 1786.71 | 1786.79 |
| 279.1               | 1868.58          | 1786.73 | 1786.68 | 1786.68 | 1786.68 | 1786.73 |
| 279                 | 1714.32          | 1786.67 | 1786.64 | 1786.64 | 1786.64 | 1786.67 |
| 278.9               | 1691.25          | 1786.62 | 1786.6  | 1786.6  | 1786.6  | 1786.62 |
| 278.8               | 1802.16          | 1786.57 | 1786.56 | 1786.56 | 1786.56 | 1786.57 |
| 278.7               | 1773.81          | 1786.53 | 1786.53 | 1786.53 | 1786.53 | 1786.53 |
| 278.6               | 1852.34          | 1786.5  | 1786.49 | 1786.49 | 1786.49 | 1786.5  |
| 278.5               | 1885.01          | 1786.48 | 1786.48 | 1786.48 | 1786.48 | 1786.48 |
| 278.4               | 1815.73          | 1835.75 | 1835.75 | 1835.75 | 1835.75 | 1835.75 |

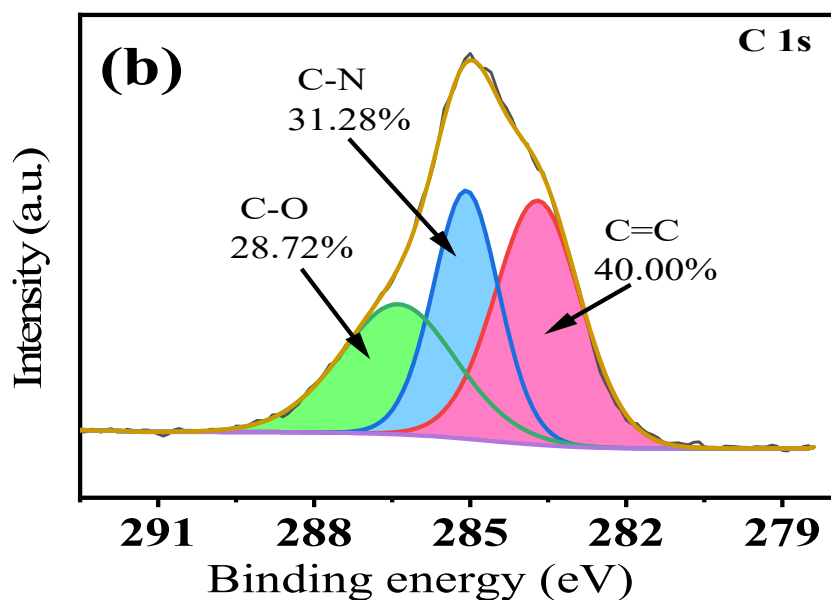

| Binding energy (eV) | Intensity (a.u.) |         |         |         |         |         |
|---------------------|------------------|---------|---------|---------|---------|---------|
|                     | LineA            | LineB   | LineC   | LineD   | LineE   | LineF   |
| 409.4               | 4347.79          | 0       | 0       | 0       | 0       | 4347.79 |
| 409.3               | 4338.93          | 0       | 0       | 0       | 0       | 4338.93 |
| 409.2               | 4416.73          | 4347.14 | 4347.14 | 4347.14 | 4347.14 | 4347.14 |
| 409.1               | 4364.66          | 4347.13 | 4347.13 | 4347.13 | 4347.13 | 4347.13 |
| 409                 | 4267.6           | 4347.11 | 4347.11 | 4347.11 | 4347.11 | 4347.11 |
| 408.9               | 4368.58          | 4347.09 | 4347.09 | 4347.09 | 4347.09 | 4347.09 |
| 408.8               | 4401.19          | 4347.07 | 4347.07 | 4347.07 | 4347.07 | 4347.07 |
| 408.7               | 4515.85          | 4347.04 | 4347.04 | 4347.04 | 4347.04 | 4347.04 |
| 408.6               | 4509.07          | 4347.01 | 4347.01 | 4347.01 | 4347.01 | 4347.01 |
| 408.5               | 4430.18          | 4346.98 | 4346.98 | 4346.98 | 4346.98 | 4346.98 |
| 408.4               | 4568.13          | 4346.96 | 4346.96 | 4346.96 | 4346.96 | 4346.96 |
| 408.3               | 4531.11          | 4346.94 | 4346.94 | 4346.94 | 4346.94 | 4346.94 |
| 408.2               | 4466.57          | 4346.91 | 4346.91 | 4346.91 | 4346.91 | 4346.91 |
| 408.1               | 4372.39          | 4346.88 | 4346.88 | 4346.88 | 4346.88 | 4346.88 |
| 408                 | 4201.32          | 4346.86 | 4346.86 | 4346.86 | 4346.86 | 4346.86 |
| 407.9               | 4330.78          | 4346.84 | 4346.84 | 4346.84 | 4346.84 | 4346.84 |
| 407.8               | 4437.81          | 4346.82 | 4346.82 | 4346.82 | 4346.82 | 4346.82 |
| 407.7               | 4389.59          | 4346.8  | 4346.8  | 4346.8  | 4346.8  | 4346.8  |
| 407.6               | 4378.9           | 4346.78 | 4346.78 | 4346.78 | 4346.78 | 4346.78 |
| 407.5               | 4438.46          | 4346.76 | 4346.76 | 4346.76 | 4346.76 | 4346.76 |
| 407.4               | 4501.51          | 4346.73 | 4346.73 | 4346.73 | 4346.73 | 4346.73 |
| 407.3               | 4504.47          | 4346.7  | 4346.7  | 4346.7  | 4346.7  | 4346.7  |
| 407.2               | 4514.83          | 4346.67 | 4346.67 | 4346.67 | 4346.67 | 4346.67 |
| 407.1               | 4530.8           | 4346.64 | 4346.64 | 4346.64 | 4346.64 | 4346.64 |
| 407                 | 4473.97          | 4346.6  | 4346.6  | 4346.6  | 4346.6  | 4346.6  |
| 406.9               | 4393.85          | 4346.57 | 4346.57 | 4346.57 | 4346.57 | 4346.57 |
| 406.8               | 4421.01          | 4346.53 | 4346.53 | 4346.53 | 4346.53 | 4346.53 |
| 406.7               | 4476.68          | 4346.5  | 4346.5  | 4346.5  | 4346.5  | 4346.5  |
| 406.6               | 4447.73          | 4346.47 | 4346.47 | 4346.47 | 4346.47 | 4346.47 |
| 406.5               | 4345.83          | 4346.44 | 4346.44 | 4346.44 | 4346.44 | 4346.44 |
| 406.4               | 4372.31          | 4346.42 | 4346.42 | 4346.42 | 4346.42 | 4346.42 |
| 406.3               | 4450.42          | 4346.39 | 4346.39 | 4346.39 | 4346.39 | 4346.39 |
| 406.2               | 4464.91          | 4346.37 | 4346.37 | 4346.37 | 4346.37 | 4346.37 |
| 406.1               | 4513.39          | 4346.34 | 4346.34 | 4346.34 | 4346.34 | 4346.34 |
| 406                 | 4459.99          | 4346.31 | 4346.31 | 4346.31 | 4346.31 | 4346.31 |
| 405.9               | 4349.49          | 4346.29 | 4346.29 | 4346.29 | 4346.29 | 4346.29 |
| 405.8               | 4424.57          | 4346.27 | 4346.27 | 4346.27 | 4346.27 | 4346.27 |
| 405.7               | 4459.58          | 4346.25 | 4346.25 | 4346.25 | 4346.25 | 4346.25 |
| 405.6               | 4428.4           | 4346.24 | 4346.24 | 4346.24 | 4346.24 | 4346.24 |
| 405.5               | 4402.85          | 4346.23 | 4346.23 | 4346.23 | 4346.23 | 4346.23 |
| 405.4               | 4260.82          | 4346.23 | 4346.23 | 4346.23 | 4346.23 | 4346.23 |
| 405.3               | 4203.74          | 4346.23 | 4346.23 | 4346.23 | 4346.23 | 4346.23 |
| 405.2               | 4245.4           | 4346.22 | 4346.22 | 4346.23 | 4346.22 | 4346.23 |
| 405.1               | 4310.76          | 4346.22 | 4346.22 | 4346.22 | 4346.22 | 4346.22 |
| 405                 | 4351.86          | 4346.21 | 4346.21 | 4346.22 | 4346.21 | 4346.22 |
| 404.9               | 4426.58          | 4346.21 | 4346.21 | 4346.22 | 4346.21 | 4346.22 |
| 404.8               | 4457.3           | 4346.2  | 4346.2  | 4346.22 | 4346.2  | 4346.22 |
| 404.7               | 4414.42          | 4346.19 | 4346.19 | 4346.23 | 4346.19 | 4346.23 |
| 404.6               | 4446.75          | 4346.18 | 4346.18 | 4346.24 | 4346.18 | 4346.24 |
| 404.5               | 4488.7           | 4346.16 | 4346.16 | 4346.26 | 4346.16 | 4346.26 |
| 404.4               | 4479.72          | 4346.14 | 4346.14 | 4346.29 | 4346.14 | 4346.29 |
| 404.3               | 4354.74          | 4346.11 | 4346.11 | 4346.35 | 4346.11 | 4346.35 |
| 404.2               | 4283.45          | 4346.08 | 4346.08 | 4346.44 | 4346.08 | 4346.44 |
| 404.1               | 4370.53          | 4346.06 | 4346.06 | 4346.61 | 4346.06 | 4346.61 |

|       |         |         |         |         |         |         |
|-------|---------|---------|---------|---------|---------|---------|
| 404   | 4556.63 | 4346.03 | 4346.03 | 4346.85 | 4346.03 | 4346.85 |
| 403.9 | 4538.36 | 4346    | 4346    | 4347.23 | 4346    | 4347.23 |
| 403.8 | 4395.32 | 4345.98 | 4345.98 | 4347.77 | 4345.98 | 4347.77 |
| 403.7 | 4361.17 | 4345.95 | 4345.95 | 4348.56 | 4345.95 | 4348.56 |
| 403.6 | 4463.58 | 4345.93 | 4345.93 | 4349.69 | 4345.93 | 4349.69 |
| 403.5 | 4543.98 | 4345.9  | 4345.9  | 4351.27 | 4345.9  | 4351.27 |
| 403.4 | 4443.31 | 4345.87 | 4345.87 | 4353.44 | 4345.87 | 4353.44 |
| 403.3 | 4388.23 | 4345.84 | 4345.84 | 4356.41 | 4345.84 | 4356.41 |
| 403.2 | 4312.13 | 4345.8  | 4345.8  | 4360.43 | 4345.8  | 4360.43 |
| 403.1 | 4362.12 | 4345.77 | 4345.76 | 4365.79 | 4345.76 | 4365.79 |
| 403   | 4558.2  | 4345.73 | 4345.72 | 4372.86 | 4345.72 | 4372.86 |
| 402.9 | 4686.59 | 4345.68 | 4345.68 | 4382.07 | 4345.68 | 4382.07 |
| 402.8 | 4597.35 | 4345.64 | 4345.63 | 4393.92 | 4345.63 | 4393.93 |
| 402.7 | 4438.76 | 4345.59 | 4345.58 | 4409    | 4345.58 | 4409.01 |
| 402.6 | 4512.16 | 4345.54 | 4345.51 | 4427.92 | 4345.51 | 4427.95 |
| 402.5 | 4589.38 | 4345.48 | 4345.44 | 4451.37 | 4345.44 | 4451.41 |
| 402.4 | 4656.35 | 4345.42 | 4345.36 | 4480.03 | 4345.36 | 4480.09 |
| 402.3 | 4672.31 | 4345.37 | 4345.28 | 4514.58 | 4345.28 | 4514.68 |
| 402.2 | 4650.51 | 4345.34 | 4345.19 | 4555.61 | 4345.19 | 4555.76 |
| 402.1 | 4736.31 | 4345.31 | 4345.09 | 4603.56 | 4345.09 | 4603.78 |
| 402   | 4620.44 | 4345.31 | 4344.97 | 4658.64 | 4344.97 | 4658.98 |
| 401.9 | 4649.04 | 4345.36 | 4344.85 | 4720.76 | 4344.85 | 4721.27 |
| 401.8 | 4901.62 | 4345.46 | 4344.71 | 4789.44 | 4344.71 | 4790.19 |
| 401.7 | 5015.92 | 4345.67 | 4344.55 | 4863.68 | 4344.55 | 4864.8  |
| 401.6 | 5015.53 | 4346.02 | 4344.39 | 4941.96 | 4344.39 | 4943.6  |
| 401.5 | 4941.29 | 4346.57 | 4344.2  | 5022.18 | 4344.2  | 5024.55 |
| 401.4 | 5072.11 | 4347.4  | 4344    | 5101.69 | 4344    | 5105.09 |
| 401.3 | 5106.36 | 4348.61 | 4343.77 | 5177.4  | 4343.77 | 5182.24 |
| 401.2 | 5114.44 | 4350.34 | 4343.52 | 5245.98 | 4343.52 | 5252.8  |
| 401.1 | 5308.22 | 4352.79 | 4343.26 | 5304.06 | 4343.26 | 5313.58 |
| 401   | 5528.21 | 4356.18 | 4342.99 | 5348.54 | 4342.99 | 5361.74 |
| 400.9 | 5506.53 | 4360.82 | 4342.71 | 5376.9  | 4342.71 | 5395.01 |
| 400.8 | 5432.06 | 4367.05 | 4342.41 | 5387.45 | 4342.41 | 5412.09 |
| 400.7 | 5363.59 | 4375.32 | 4342.11 | 5379.55 | 4342.11 | 5412.76 |
| 400.6 | 5287.52 | 4386.16 | 4341.81 | 5353.65 | 4341.81 | 5398.01 |
| 400.5 | 5378.03 | 4400.2  | 4341.51 | 5311.28 | 4341.5  | 5369.98 |
| 400.4 | 5410.48 | 4418.17 | 4341.24 | 5254.82 | 4341.19 | 5331.84 |
| 400.3 | 5348.89 | 4440.9  | 4341.15 | 5187.31 | 4340.9  | 5287.56 |
| 400.2 | 5261.7  | 4469.32 | 4341.68 | 5112.09 | 4340.62 | 5241.86 |
| 400.1 | 5238.65 | 4504.4  | 4344.3  | 5032.53 | 4340.33 | 5200.57 |
| 400   | 5170.67 | 4547.19 | 4352.86 | 4951.76 | 4340.04 | 5171.72 |
| 399.9 | 5098.68 | 4598.73 | 4375.48 | 4872.5  | 4339.75 | 5167.21 |
| 399.8 | 5181.39 | 4660    | 4424.82 | 4796.96 | 4339.45 | 5202.89 |
| 399.7 | 5394.43 | 4731.88 | 4511.6  | 4726.77 | 4339.15 | 5291.95 |
| 399.6 | 5456.78 | 4814.97 | 4626.92 | 4663    | 4338.84 | 5427.21 |
| 399.5 | 5585.36 | 4909.57 | 4725.29 | 4606.22 | 4338.52 | 5564.04 |
| 399.4 | 5605.61 | 5015.51 | 4745.49 | 4556.59 | 4338.19 | 5641.21 |
| 399.3 | 5471.76 | 5132.04 | 4672.58 | 4513.94 | 4337.85 | 5642.85 |
| 399.2 | 5589.17 | 5257.7  | 4556.04 | 4477.83 | 4337.49 | 5616.6  |
| 399.1 | 5616.42 | 5390.27 | 4453.77 | 4447.71 | 4337.1  | 5617.55 |
| 399   | 5539.52 | 5526.72 | 4388.93 | 4422.91 | 4336.69 | 5665.17 |
| 398.9 | 5633.02 | 5663.21 | 4356.21 | 4402.74 | 4336.26 | 5749.63 |
| 398.8 | 5907.44 | 5795.23 | 4342.37 | 4386.53 | 4335.82 | 5852.51 |
| 398.7 | 6106.86 | 5917.81 | 4337.21 | 4373.63 | 4335.35 | 5957.96 |
| 398.6 | 6186.14 | 6025.8  | 4335.32 | 4363.46 | 4334.86 | 6054.86 |
| 398.5 | 6192.08 | 6114.24 | 4334.45 | 4355.5  | 4334.35 | 6135.48 |



|       |         |         |         |         |         |         |
|-------|---------|---------|---------|---------|---------|---------|
| 398.4 | 6237.02 | 6178.79 | 4333.85 | 4349.31 | 4333.83 | 6194.28 |
| 398.3 | 6363.42 | 6216.11 | 4333.3  | 4344.51 | 4333.3  | 6227.33 |
| 398.2 | 6241.59 | 6224.22 | 4332.75 | 4340.79 | 4332.75 | 6232.26 |
| 398.1 | 6127.41 | 6202.66 | 4332.21 | 4337.91 | 4332.21 | 6208.37 |
| 398   | 6210.35 | 6152.56 | 4331.67 | 4335.68 | 4331.67 | 6156.57 |
| 397.9 | 6087.6  | 6076.51 | 4331.15 | 4333.93 | 4331.15 | 6079.3  |
| 397.8 | 5978.26 | 5978.33 | 4330.64 | 4332.56 | 4330.64 | 5980.24 |
| 397.7 | 5943.74 | 5862.66 | 4330.16 | 4331.47 | 4330.16 | 5863.96 |
| 397.6 | 5735.36 | 5734.6  | 4329.72 | 4330.6  | 4329.72 | 5735.48 |
| 397.5 | 5676.31 | 5599.27 | 4329.31 | 4329.9  | 4329.31 | 5599.86 |
| 397.4 | 5513.87 | 5461.48 | 4328.93 | 4329.32 | 4328.93 | 5461.87 |
| 397.3 | 5303.95 | 5325.49 | 4328.59 | 4328.84 | 4328.59 | 5325.75 |
| 397.2 | 5162.94 | 5194.81 | 4328.28 | 4328.44 | 4328.28 | 5194.97 |
| 397.1 | 4973.33 | 5072.11 | 4328    | 4328.11 | 4328    | 5072.22 |
| 397   | 4918.07 | 4959.3  | 4327.76 | 4327.83 | 4327.76 | 4959.37 |
| 396.9 | 4851.77 | 4857.51 | 4327.55 | 4327.59 | 4327.55 | 4857.55 |
| 396.8 | 4801.53 | 4767.23 | 4327.36 | 4327.39 | 4327.36 | 4767.25 |
| 396.7 | 4767.23 | 4688.42 | 4327.21 | 4327.22 | 4327.21 | 4688.44 |
| 396.6 | 4755.6  | 4620.63 | 4327.07 | 4327.08 | 4327.07 | 4620.64 |
| 396.5 | 4715.66 | 4563.13 | 4326.95 | 4326.96 | 4326.95 | 4563.13 |
| 396.4 | 4606.5  | 4514.98 | 4326.85 | 4326.85 | 4326.85 | 4514.98 |
| 396.3 | 4537.88 | 4475.16 | 4326.76 | 4326.76 | 4326.76 | 4475.17 |
| 396.2 | 4545.41 | 4442.63 | 4326.69 | 4326.69 | 4326.69 | 4442.64 |
| 396.1 | 4452.58 | 4416.36 | 4326.62 | 4326.62 | 4326.62 | 4416.36 |
| 396   | 4367.09 | 4395.37 | 4326.57 | 4326.57 | 4326.57 | 4395.37 |
| 395.9 | 4416.78 | 4378.79 | 4326.53 | 4326.53 | 4326.53 | 4378.79 |
| 395.8 | 4375.13 | 4365.83 | 4326.49 | 4326.49 | 4326.49 | 4365.83 |
| 395.7 | 4360.5  | 4355.79 | 4326.45 | 4326.45 | 4326.45 | 4355.79 |
| 395.6 | 4376.7  | 4348.09 | 4326.41 | 4326.41 | 4326.41 | 4348.09 |
| 395.5 | 4498.37 | 4342.26 | 4326.38 | 4326.38 | 4326.38 | 4342.26 |
| 395.4 | 4535.57 | 4337.88 | 4326.35 | 4326.35 | 4326.35 | 4337.88 |
| 395.3 | 4534.85 | 4334.61 | 4326.32 | 4326.32 | 4326.32 | 4334.61 |
| 395.2 | 4535.38 | 4332.2  | 4326.29 | 4326.29 | 4326.29 | 4332.2  |
| 395.1 | 4339.04 | 4330.44 | 4326.26 | 4326.26 | 4326.26 | 4330.44 |
| 395   | 4287.57 | 4329.16 | 4326.23 | 4326.23 | 4326.23 | 4329.16 |
| 394.9 | 4352.26 | 4328.24 | 4326.21 | 4326.21 | 4326.21 | 4328.24 |
| 394.8 | 4420.19 | 4327.58 | 4326.18 | 4326.18 | 4326.18 | 4327.58 |
| 394.7 | 4393.87 | 4327.12 | 4326.17 | 4326.17 | 4326.17 | 4327.12 |
| 394.6 | 4377.04 | 4326.79 | 4326.15 | 4326.15 | 4326.15 | 4326.79 |
| 394.5 | 4329.19 | 4326.56 | 4326.13 | 4326.13 | 4326.13 | 4326.56 |
| 394.4 | 4278.93 | 4326.4  | 4326.11 | 4326.11 | 4326.11 | 4326.4  |
| 394.3 | 4445.86 | 4326.28 | 4326.09 | 4326.09 | 4326.09 | 4326.28 |
| 394.2 | 4460.71 | 4326.19 | 4326.07 | 4326.07 | 4326.07 | 4326.19 |
| 394.1 | 4489.19 | 4326.13 | 4326.05 | 4326.05 | 4326.05 | 4326.13 |
| 394   | 4450.33 | 4326.09 | 4326.04 | 4326.04 | 4326.04 | 4326.09 |
| 393.9 | 4333.59 | 4326.05 | 4326.02 | 4326.02 | 4326.02 | 4326.05 |
| 393.8 | 4394.81 | 4326.02 | 4326    | 4326    | 4326    | 4326.02 |
| 393.7 | 4319.99 | 4325.99 | 4325.98 | 4325.98 | 4325.98 | 4325.99 |
| 393.6 | 4296.55 | 4325.97 | 4325.96 | 4325.96 | 4325.96 | 4325.97 |
| 393.5 | 4408.06 | 4325.94 | 4325.94 | 4325.94 | 4325.94 | 4325.94 |
| 393.4 | 4396.11 | 4325.92 | 4325.92 | 4325.92 | 4325.92 | 4325.92 |
| 393.3 | 4377.49 | 4325.9  | 4325.9  | 4325.9  | 4325.9  | 4325.9  |
| 393.2 | 4437.58 | 4325.89 | 4325.89 | 4325.89 | 4325.89 | 4325.89 |
| 393.1 | 4428.74 | 4325.88 | 4325.88 | 4325.88 | 4325.88 | 4325.88 |
| 393   | 4464.38 | 4325.87 | 4325.87 | 4325.87 | 4325.87 | 4325.87 |
| 392.9 | 4339.34 | 4325.86 | 4325.86 | 4325.86 | 4325.86 | 4325.86 |

|       |         |         |         |         |         |         |
|-------|---------|---------|---------|---------|---------|---------|
| 392.8 | 4153.6  | 4325.86 | 4325.86 | 4325.86 | 4325.86 | 4325.86 |
| 392.7 | 4307.41 | 4325.86 | 4325.86 | 4325.86 | 4325.86 | 4325.86 |
| 392.6 | 4352.56 | 4325.85 | 4325.85 | 4325.85 | 4325.85 | 4325.85 |
| 392.5 | 4194.12 | 4325.85 | 4325.85 | 4325.85 | 4325.85 | 4325.85 |
| 392.4 | 4240.36 | 4325.84 | 4325.84 | 4325.84 | 4325.84 | 4325.84 |
| 392.3 | 4386.62 | 4338.64 | 4338.64 | 4338.64 | 4338.64 | 4338.64 |
| 392.2 | 4449.63 | 4351.45 | 4351.45 | 4351.45 | 4351.45 | 4351.45 |
| 392.1 | 4458.37 | 4364.25 | 4364.25 | 4364.25 | 4364.25 | 4364.25 |
| 392   | 4356.44 | 4377.05 | 4377.05 | 4377.05 | 4377.05 | 4377.05 |
| 391.9 | 4345.83 | 4389.85 | 4389.85 | 4389.85 | 4389.85 | 4389.85 |
| 391.8 | 4401.76 | 4402.65 | 4402.65 | 4402.65 | 4402.65 | 4402.65 |
| 391.7 | 4321.21 | 4415.45 | 4415.45 | 4415.45 | 4415.45 | 4415.45 |
| 391.6 | 4356.11 | 4428.25 | 4428.25 | 4428.25 | 4428.25 | 4428.25 |
| 391.5 | 4516.8  | 4441.05 | 4441.05 | 4441.05 | 4441.05 | 4441.05 |
| 391.4 | 4570.1  | 0       | 0       | 0       | 0       | 4570.1  |

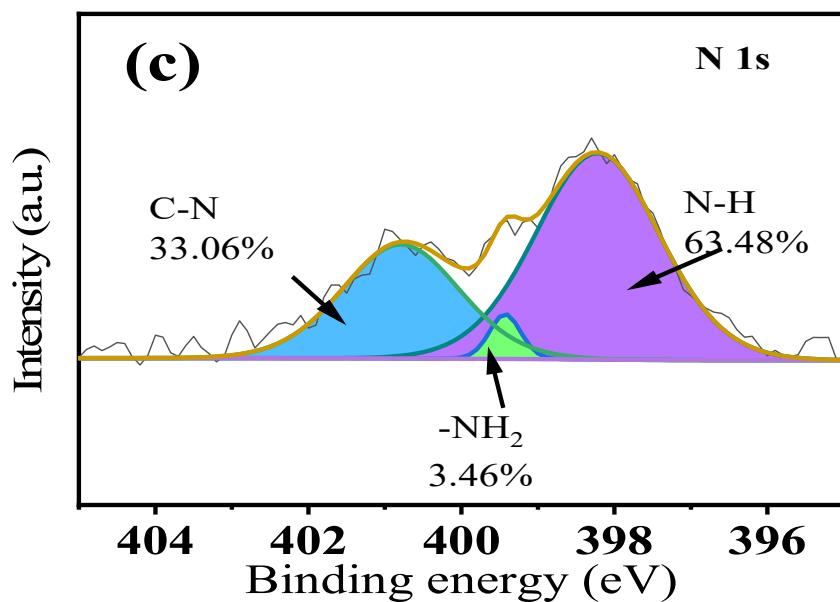

| Binding energy (eV) | Intensity (a.u.) |         |         |         |         |         |
|---------------------|------------------|---------|---------|---------|---------|---------|
|                     | LineA            | LineB   | LineC   | LineD   | LineE   | LineF   |
| 409.3               | 3348.18          | 0       | 0       | 0       | 0       | 3348.18 |
| 409.2               | 3396.24          | 0       | 0       | 0       | 0       | 3396.24 |
| 409.1               | 3511.16          | 3398.34 | 3398.34 | 3398.34 | 3398.34 | 3398.34 |
| 409                 | 3474.72          | 3357.48 | 3357.48 | 3357.48 | 3357.48 | 3357.48 |
| 408.9               | 3261.41          | 3357.47 | 3357.47 | 3357.47 | 3357.47 | 3357.47 |
| 408.8               | 3283.81          | 3357.47 | 3357.47 | 3357.47 | 3357.47 | 3357.47 |
| 408.7               | 3395.83          | 3357.43 | 3357.43 | 3357.43 | 3357.43 | 3357.43 |
| 408.6               | 3305.27          | 3357.38 | 3357.38 | 3357.38 | 3357.38 | 3357.38 |
| 408.5               | 3270.13          | 3357.32 | 3357.32 | 3357.32 | 3357.32 | 3357.32 |
| 408.4               | 3374.06          | 3357.28 | 3357.28 | 3357.28 | 3357.28 | 3357.28 |
| 408.3               | 3584.41          | 3357.25 | 3357.25 | 3357.25 | 3357.25 | 3357.25 |
| 408.2               | 3613.07          | 3357.21 | 3357.21 | 3357.21 | 3357.21 | 3357.21 |
| 408.1               | 3418.88          | 3357.16 | 3357.16 | 3357.16 | 3357.16 | 3357.16 |
| 408                 | 3322.37          | 3357.1  | 3357.1  | 3357.1  | 3357.1  | 3357.1  |
| 407.9               | 3350.01          | 3357.02 | 3357.02 | 3357.02 | 3357.02 | 3357.02 |
| 407.8               | 3375.66          | 3356.94 | 3356.94 | 3356.94 | 3356.94 | 3356.94 |
| 407.7               | 3421.82          | 3356.87 | 3356.87 | 3356.87 | 3356.87 | 3356.87 |
| 407.6               | 3478.39          | 3356.82 | 3356.82 | 3356.82 | 3356.82 | 3356.82 |
| 407.5               | 3455.23          | 3356.79 | 3356.79 | 3356.79 | 3356.79 | 3356.79 |
| 407.4               | 3297.31          | 3356.76 | 3356.76 | 3356.76 | 3356.76 | 3356.76 |
| 407.3               | 3280.96          | 3356.73 | 3356.73 | 3356.73 | 3356.73 | 3356.73 |
| 407.2               | 3379.78          | 3356.69 | 3356.69 | 3356.69 | 3356.69 | 3356.69 |
| 407.1               | 3419.3           | 3356.66 | 3356.66 | 3356.66 | 3356.66 | 3356.66 |
| 407                 | 3414.26          | 3356.64 | 3356.64 | 3356.64 | 3356.64 | 3356.64 |
| 406.9               | 3352.52          | 3356.63 | 3356.63 | 3356.63 | 3356.63 | 3356.63 |
| 406.8               | 3353.31          | 3356.62 | 3356.62 | 3356.62 | 3356.62 | 3356.62 |
| 406.7               | 3350.51          | 3356.61 | 3356.61 | 3356.61 | 3356.61 | 3356.61 |
| 406.6               | 3305.36          | 3356.6  | 3356.6  | 3356.6  | 3356.6  | 3356.6  |
| 406.5               | 3404.84          | 3356.58 | 3356.58 | 3356.58 | 3356.58 | 3356.58 |
| 406.4               | 3431.12          | 3356.54 | 3356.54 | 3356.54 | 3356.54 | 3356.54 |
| 406.3               | 3273.72          | 3356.5  | 3356.5  | 3356.5  | 3356.5  | 3356.5  |
| 406.2               | 3341.33          | 3356.45 | 3356.45 | 3356.45 | 3356.45 | 3356.45 |
| 406.1               | 3432.69          | 3356.39 | 3356.39 | 3356.39 | 3356.39 | 3356.39 |
| 406                 | 3543.77          | 3356.34 | 3356.34 | 3356.34 | 3356.34 | 3356.34 |
| 405.9               | 3567.72          | 3356.27 | 3356.27 | 3356.27 | 3356.27 | 3356.27 |
| 405.8               | 3397.39          | 3356.19 | 3356.19 | 3356.19 | 3356.19 | 3356.19 |
| 405.7               | 3367.98          | 3356.12 | 3356.12 | 3356.12 | 3356.12 | 3356.12 |
| 405.6               | 3401.65          | 3356.04 | 3356.04 | 3356.04 | 3356.04 | 3356.04 |
| 405.5               | 3428.88          | 3355.95 | 3355.95 | 3355.95 | 3355.95 | 3355.95 |
| 405.4               | 3460.58          | 3355.86 | 3355.86 | 3355.86 | 3355.86 | 3355.86 |
| 405.3               | 3401.16          | 3355.78 | 3355.79 | 3355.78 | 3355.78 | 3355.79 |
| 405.2               | 3381.65          | 3355.73 | 3355.73 | 3355.73 | 3355.73 | 3355.73 |
| 405.1               | 3424.2           | 3355.66 | 3355.68 | 3355.66 | 3355.66 | 3355.68 |
| 405                 | 3404.28          | 3355.6  | 3355.62 | 3355.6  | 3355.6  | 3355.62 |
| 404.9               | 3388.97          | 3355.55 | 3355.59 | 3355.55 | 3355.55 | 3355.59 |
| 404.8               | 3420.56          | 3355.51 | 3355.56 | 3355.51 | 3355.51 | 3355.56 |
| 404.7               | 3430.06          | 3355.47 | 3355.55 | 3355.47 | 3355.47 | 3355.55 |
| 404.6               | 3338.9           | 3355.43 | 3355.55 | 3355.43 | 3355.43 | 3355.55 |
| 404.5               | 3287.91          | 3355.39 | 3355.57 | 3355.39 | 3355.39 | 3355.57 |
| 404.4               | 3386.61          | 3355.35 | 3355.61 | 3355.35 | 3355.35 | 3355.61 |
| 404.3               | 3439.08          | 3355.3  | 3355.7  | 3355.3  | 3355.3  | 3355.7  |
| 404.2               | 3379.36          | 3355.27 | 3355.84 | 3355.27 | 3355.27 | 3355.84 |
| 404.1               | 3353.81          | 3355.23 | 3356.06 | 3355.23 | 3355.23 | 3356.06 |
| 404                 | 3451.79          | 3355.19 | 3356.38 | 3355.19 | 3355.19 | 3356.38 |

| Binding energy (eV) | Intensity (a.u.) |         |         |         |         |         |
|---------------------|------------------|---------|---------|---------|---------|---------|
|                     | LineA            | LineB   | LineC   | LineD   | LineE   | LineF   |
| 403.9               | 3439.93          | 3355.14 | 3356.84 | 3355.14 | 3355.14 | 3356.84 |
| 403.8               | 3337             | 3355.07 | 3357.47 | 3355.07 | 3355.07 | 3357.47 |
| 403.7               | 3379.89          | 3355    | 3358.35 | 3355    | 3355    | 3358.35 |
| 403.6               | 3476.83          | 3354.94 | 3359.59 | 3354.93 | 3354.93 | 3359.59 |
| 403.5               | 3466.79          | 3354.87 | 3361.26 | 3354.87 | 3354.87 | 3361.26 |
| 403.4               | 3453.1           | 3354.79 | 3363.49 | 3354.79 | 3354.79 | 3363.5  |
| 403.3               | 3422.39          | 3354.74 | 3366.48 | 3354.74 | 3354.74 | 3366.49 |
| 403.2               | 3347.66          | 3354.71 | 3370.41 | 3354.7  | 3354.7  | 3370.41 |
| 403.1               | 3435             | 3354.67 | 3375.47 | 3354.66 | 3354.66 | 3375.48 |
| 403                 | 3414.37          | 3354.62 | 3381.94 | 3354.61 | 3354.6  | 3381.95 |
| 402.9               | 3242.42          | 3354.57 | 3390.12 | 3354.56 | 3354.55 | 3390.14 |
| 402.8               | 3239.46          | 3354.53 | 3400.34 | 3354.51 | 3354.5  | 3400.39 |
| 402.7               | 3431.52          | 3354.49 | 3412.99 | 3354.46 | 3354.44 | 3413.05 |
| 402.6               | 3480.88          | 3354.44 | 3428.42 | 3354.4  | 3354.37 | 3428.52 |
| 402.5               | 3443.7           | 3354.37 | 3447.03 | 3354.32 | 3354.28 | 3447.18 |
| 402.4               | 3487.03          | 3354.3  | 3469.21 | 3354.23 | 3354.16 | 3469.42 |
| 402.3               | 3485.03          | 3354.22 | 3495.29 | 3354.14 | 3354.03 | 3495.6  |
| 402.2               | 3553.41          | 3354.11 | 3525.52 | 3354.02 | 3353.85 | 3525.96 |
| 402.1               | 3647.66          | 3353.99 | 3560.04 | 3353.88 | 3353.62 | 3560.67 |
| 402                 | 3621.74          | 3353.87 | 3598.85 | 3353.74 | 3353.35 | 3599.76 |
| 401.9               | 3603.81          | 3353.75 | 3641.73 | 3353.61 | 3353.03 | 3643.03 |
| 401.8               | 3704.54          | 3353.66 | 3688.24 | 3353.54 | 3352.68 | 3690.07 |
| 401.7               | 3753.98          | 3353.63 | 3737.62 | 3353.54 | 3352.3  | 3740.19 |
| 401.6               | 3840.41          | 3353.66 | 3788.81 | 3353.66 | 3351.87 | 3792.41 |
| 401.5               | 3921.55          | 3353.81 | 3840.48 | 3353.97 | 3351.39 | 3845.46 |
| 401.4               | 3827.39          | 3354.1  | 3890.98 | 3354.54 | 3350.89 | 3897.85 |
| 401.3               | 3844.9           | 3354.58 | 3938.5  | 3355.47 | 3350.33 | 3947.88 |
| 401.2               | 3952.23          | 3355.31 | 3981.07 | 3356.88 | 3349.73 | 3993.81 |
| 401.1               | 3964.62          | 3356.38 | 4016.82 | 3358.96 | 3349.08 | 4033.98 |
| 401                 | 4025.1           | 3357.85 | 4043.99 | 3361.9  | 3348.39 | 4066.95 |
| 400.9               | 4094.03          | 3359.83 | 4061.2  | 3365.96 | 3347.66 | 4091.68 |
| 400.8               | 4088.78          | 3362.46 | 4067.53 | 3371.47 | 3346.89 | 4107.68 |
| 400.7               | 4132.38          | 3365.88 | 4062.6  | 3378.81 | 3346.1  | 4115.09 |
| 400.6               | 4219.78          | 3370.25 | 4046.64 | 3388.41 | 3345.29 | 4114.72 |
| 400.5               | 4312.83          | 3375.75 | 4020.46 | 3400.8  | 3344.48 | 4108.06 |
| 400.4               | 4236.97          | 3382.58 | 3985.36 | 3416.55 | 3343.68 | 4097.13 |
| 400.3               | 4050.22          | 3390.92 | 3942.99 | 3436.25 | 3342.87 | 4084.42 |
| 400.2               | 4011.53          | 3401    | 3895.22 | 3460.57 | 3342.07 | 4072.65 |
| 400.1               | 3950.22          | 3413    | 3844    | 3490.18 | 3341.27 | 4064.65 |
| 400                 | 3910.44          | 3427.15 | 3791.19 | 3525.73 | 3340.47 | 4063.14 |
| 399.9               | 4019.01          | 3443.62 | 3738.47 | 3567.79 | 3339.65 | 4070.57 |
| 399.8               | 4077.26          | 3462.56 | 3687.28 | 3616.83 | 3338.83 | 4089.01 |
| 399.7               | 4062.96          | 3484.1  | 3638.73 | 3673.12 | 3338    | 4119.96 |
| 399.6               | 4151.26          | 3508.25 | 3593.63 | 3736.65 | 3337.11 | 4164.3  |
| 399.5               | 4306.33          | 3534.97 | 3552.49 | 3807.06 | 3336.17 | 4222.19 |
| 399.4               | 4379.71          | 3564.15 | 3515.58 | 3883.62 | 3335.16 | 4293.03 |
| 399.3               | 4400.2           | 3595.54 | 3482.96 | 3965.07 | 3334.08 | 4375.41 |
| 399.2               | 4531.24          | 3628.77 | 3454.5  | 4049.68 | 3332.92 | 4467.11 |
| 399.1               | 4612.34          | 3663.35 | 3429.97 | 4135.17 | 3331.69 | 4565.11 |
| 399                 | 4600.5           | 3698.63 | 3409.05 | 4218.81 | 3330.39 | 4665.72 |
| 398.9               | 4663.34          | 3733.83 | 3391.36 | 4297.52 | 3329.01 | 4764.68 |
| 398.8               | 4774.32          | 3768.05 | 3376.5  | 4368    | 3327.55 | 4857.44 |
| 398.7               | 4825.71          | 3800.32 | 3364.09 | 4427.05 | 3326.03 | 4939.41 |
| 398.6               | 4802.43          | 3829.62 | 3353.76 | 4471.75 | 3324.44 | 5006.26 |

| Binding energy (eV) | Intensity (a.u.) |         |         |         |         |         |
|---------------------|------------------|---------|---------|---------|---------|---------|
|                     | LineA            | LineB   | LineC   | LineD   | LineE   | LineF   |
| 398.5               | 4927.83          | 3854.93 | 3345.18 | 4499.73 | 3322.79 | 5054.26 |
| 398.4               | 5099.13          | 3875.33 | 3338.04 | 4509.45 | 3321.11 | 5080.6  |
| 398.3               | 5051.69          | 3890    | 3332.1  | 4500.31 | 3319.41 | 5083.59 |
| 398.2               | 5036.95          | 3898.34 | 3327.13 | 4472.72 | 3317.7  | 5062.79 |
| 398.1               | 5096.79          | 3899.97 | 3322.95 | 4428.1  | 3316.02 | 5018.99 |
| 398                 | 4999.68          | 3894.76 | 3319.42 | 4368.65 | 3314.36 | 4954.12 |
| 397.9               | 4788.65          | 3882.87 | 3316.4  | 4297.22 | 3312.74 | 4871.02 |
| 397.8               | 4647.21          | 3864.72 | 3313.8  | 4217.03 | 3311.18 | 4773.2  |
| 397.7               | 4610.39          | 3840.99 | 3311.57 | 4131.37 | 3309.7  | 4664.52 |
| 397.6               | 4501.33          | 3812.49 | 3309.63 | 4043.4  | 3308.32 | 4548.88 |
| 397.5               | 4382.26          | 3780.2  | 3307.95 | 3955.94 | 3307.03 | 4430.02 |
| 397.4               | 4285.1           | 3745.16 | 3306.5  | 3871.39 | 3305.87 | 4311.32 |
| 397.3               | 4190.45          | 3708.39 | 3305.26 | 3791.61 | 3304.82 | 4195.61 |
| 397.2               | 4145.26          | 3670.85 | 3304.17 | 3717.92 | 3303.88 | 4085.19 |
| 397.1               | 3990.58          | 3633.42 | 3303.22 | 3651.15 | 3303.02 | 3981.75 |
| 397                 | 3836.04          | 3596.87 | 3302.37 | 3591.69 | 3302.24 | 3886.46 |
| 396.9               | 3741.09          | 3561.83 | 3301.62 | 3539.6  | 3301.53 | 3799.99 |
| 396.8               | 3739.43          | 3528.82 | 3300.97 | 3494.66 | 3300.91 | 3722.63 |
| 396.7               | 3779.43          | 3498.16 | 3300.4  | 3456.43 | 3300.36 | 3654.28 |
| 396.6               | 3805.74          | 3470.11 | 3299.91 | 3424.35 | 3299.88 | 3594.6  |
| 396.5               | 3689.2           | 3444.77 | 3299.5  | 3397.76 | 3299.49 | 3543.06 |
| 396.4               | 3534.14          | 3422.16 | 3299.17 | 3376    | 3299.16 | 3499.02 |
| 396.3               | 3507.75          | 3402.2  | 3298.88 | 3358.39 | 3298.88 | 3461.73 |
| 396.2               | 3422.35          | 3384.77 | 3298.64 | 3344.3  | 3298.64 | 3430.43 |
| 396.1               | 3349.58          | 3369.69 | 3298.44 | 3333.14 | 3298.43 | 3404.4  |
| 396                 | 3304.48          | 3356.78 | 3298.27 | 3324.4  | 3298.27 | 3382.92 |
| 395.9               | 3286.38          | 3345.85 | 3298.14 | 3317.64 | 3298.14 | 3365.34 |
| 395.8               | 3335.12          | 3336.68 | 3298.07 | 3312.48 | 3298.07 | 3351.09 |
| 395.7               | 3361.13          | 3329.05 | 3298.02 | 3308.57 | 3298.02 | 3339.6  |
| 395.6               | 3417.11          | 3322.75 | 3297.99 | 3305.65 | 3297.99 | 3330.41 |
| 395.5               | 3348.09          | 3317.59 | 3297.97 | 3303.48 | 3297.97 | 3323.1  |
| 395.4               | 3186.56          | 3313.39 | 3297.94 | 3301.87 | 3297.94 | 3317.32 |
| 395.3               | 3285.66          | 3309.98 | 3297.91 | 3300.69 | 3297.91 | 3312.76 |
| 395.2               | 3307.13          | 3307.24 | 3297.87 | 3299.81 | 3297.87 | 3309.18 |
| 395.1               | 3295.86          | 3305.05 | 3297.82 | 3299.17 | 3297.82 | 3306.39 |
| 395                 | 3371.57          | 3303.31 | 3297.77 | 3298.7  | 3297.77 | 3304.23 |
| 394.9               | 3408.59          | 3301.94 | 3297.74 | 3298.37 | 3297.74 | 3302.58 |
| 394.8               | 3412             | 3300.88 | 3297.7  | 3298.12 | 3297.7  | 3301.3  |
| 394.7               | 3388.98          | 3300.03 | 3297.65 | 3297.93 | 3297.65 | 3300.32 |
| 394.6               | 3313.44          | 3299.36 | 3297.58 | 3297.77 | 3297.58 | 3299.55 |
| 394.5               | 3358.05          | 3298.82 | 3297.51 | 3297.63 | 3297.51 | 3298.95 |
| 394.4               | 3357.08          | 3298.39 | 3297.42 | 3297.5  | 3297.42 | 3298.47 |
| 394.3               | 3296.89          | 3298.05 | 3297.35 | 3297.4  | 3297.35 | 3298.1  |
| 394.2               | 3412.81          | 3297.79 | 3297.27 | 3297.31 | 3297.27 | 3297.82 |
| 394.1               | 3438.69          | 3297.58 | 3297.21 | 3297.24 | 3297.21 | 3297.61 |
| 394                 | 3368.11          | 3297.43 | 3297.17 | 3297.18 | 3297.17 | 3297.44 |
| 393.9               | 3323.03          | 3297.31 | 3297.12 | 3297.12 | 3297.12 | 3297.31 |
| 393.8               | 3331.43          | 3297.2  | 3297.06 | 3297.07 | 3297.06 | 3297.2  |
| 393.7               | 3297.76          | 3297.1  | 3297.01 | 3297.01 | 3297.01 | 3297.1  |
| 393.6               | 3268.53          | 3297.02 | 3296.95 | 3296.95 | 3296.95 | 3297.02 |
| 393.5               | 3328.55          | 3296.96 | 3296.91 | 3296.91 | 3296.91 | 3296.96 |
| 393.4               | 3400.97          | 3296.91 | 3296.88 | 3296.88 | 3296.88 | 3296.91 |
| 393.3               | 3370.96          | 3296.88 | 3296.86 | 3296.86 | 3296.86 | 3296.88 |
| 393.2               | 3297.32          | 3296.83 | 3296.82 | 3296.82 | 3296.82 | 3296.83 |

| Binding energy (eV) | Intensity (a.u.) |         |         |         |         |         |
|---------------------|------------------|---------|---------|---------|---------|---------|
|                     | LineA            | LineB   | LineC   | LineD   | LineE   | LineF   |
| 393.1               | 3270.29          | 3296.8  | 3296.79 | 3296.79 | 3296.79 | 3296.8  |
| 393                 | 3305.34          | 3296.77 | 3296.76 | 3296.76 | 3296.76 | 3296.77 |
| 392.9               | 3341.56          | 3296.73 | 3296.72 | 3296.72 | 3296.72 | 3296.73 |
| 392.8               | 3438.85          | 3296.69 | 3296.69 | 3296.69 | 3296.69 | 3296.69 |
| 392.7               | 3275.7           | 3296.67 | 3296.67 | 3296.67 | 3296.67 | 3296.67 |
| 392.6               | 3236.88          | 3296.66 | 3296.66 | 3296.66 | 3296.66 | 3296.66 |
| 392.5               | 3394.59          | 3296.66 | 3296.66 | 3296.66 | 3296.66 | 3296.66 |
| 392.4               | 3264.68          | 3297.4  | 3297.4  | 3297.4  | 3297.4  | 3297.4  |
| 392.3               | 3253.39          | 3298.13 | 3298.13 | 3298.13 | 3298.13 | 3298.13 |
| 392.2               | 3295.09          | 3298.87 | 3298.87 | 3298.87 | 3298.87 | 3298.87 |
| 392.1               | 3189.68          | 3299.61 | 3299.61 | 3299.61 | 3299.61 | 3299.61 |
| 392                 | 3267.5           | 3300.35 | 3300.35 | 3300.35 | 3300.35 | 3300.35 |
| 391.9               | 3388.5           | 3301.08 | 3301.08 | 3301.08 | 3301.08 | 3301.08 |
| 391.8               | 3360.37          | 3301.82 | 3301.82 | 3301.82 | 3301.82 | 3301.82 |
| 391.7               | 3368.69          | 3302.56 | 3302.56 | 3302.56 | 3302.56 | 3302.56 |
| 391.6               | 3317.18          | 3303.3  | 3303.3  | 3303.3  | 3303.3  | 3303.3  |
| 391.5               | 3351.25          | 3304.03 | 3304.03 | 3304.03 | 3304.03 | 3304.03 |
| 391.4               | 3304.45          | 3304.77 | 3304.77 | 3304.77 | 3304.77 | 3304.77 |
| 391.3               | 3246.2           | 0       | 0       | 0       | 0       | 3246.2  |

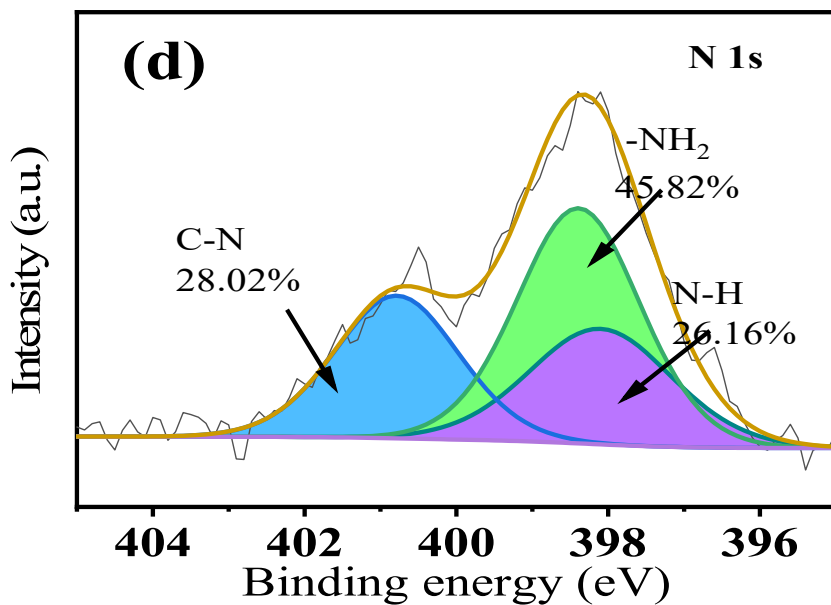

| Binding energy (eV) | Intensity (a.u.) |         |         |         |         |         |         |
|---------------------|------------------|---------|---------|---------|---------|---------|---------|
|                     | LineA            | LineB   | LineC   | LineD   | LineE   | LineF   | LineG   |
| 174.2               | 1475.02          | 1548.05 | 1548.05 | 1548.05 | 1548.05 | 1548.05 | 1548.05 |
| 174.1               | 1532.35          | 1546.31 | 1546.31 | 1546.31 | 1546.31 | 1546.31 | 1546.31 |
| 174                 | 1526.47          | 1544.39 | 1544.39 | 1544.39 | 1544.39 | 1544.39 | 1544.39 |
| 173.9               | 1540.23          | 1542.34 | 1542.34 | 1542.34 | 1542.34 | 1542.34 | 1542.34 |
| 173.8               | 1522.17          | 1540.43 | 1540.43 | 1540.43 | 1540.43 | 1540.43 | 1540.43 |
| 173.7               | 1472.27          | 1536.46 | 1536.46 | 1536.46 | 1536.46 | 1536.46 | 1536.46 |
| 173.6               | 1540.87          | 1531.52 | 1531.52 | 1531.52 | 1531.52 | 1531.52 | 1531.52 |
| 173.5               | 1541.7           | 1522.73 | 1522.73 | 1522.73 | 1522.73 | 1522.73 | 1522.73 |
| 173.4               | 1487.66          | 1513.27 | 1513.27 | 1513.27 | 1513.27 | 1513.27 | 1513.27 |
| 173.3               | 1480.95          | 1489.35 | 1489.35 | 1489.35 | 1489.35 | 1489.35 | 1489.35 |
| 173.2               | 1438.08          | 1468.83 | 1468.83 | 1468.83 | 1468.84 | 1468.83 | 1468.84 |
| 173.1               | 1481.26          | 1466.88 | 1466.88 | 1466.88 | 1466.88 | 1466.88 | 1466.88 |
| 173                 | 1465.45          | 1453.49 | 1453.49 | 1453.49 | 1453.49 | 1453.49 | 1453.49 |
| 172.9               | 1392.78          | 1442.17 | 1442.17 | 1442.17 | 1442.17 | 1442.17 | 1442.17 |
| 172.8               | 1410.57          | 1437.78 | 1437.78 | 1437.78 | 1437.79 | 1437.78 | 1437.79 |
| 172.7               | 1445.58          | 1429.51 | 1429.51 | 1429.51 | 1429.52 | 1429.51 | 1429.52 |
| 172.6               | 1450.72          | 1422.61 | 1422.61 | 1422.61 | 1422.62 | 1422.61 | 1422.62 |
| 172.5               | 1393.59          | 1419.96 | 1419.96 | 1419.96 | 1419.97 | 1419.96 | 1419.97 |
| 172.4               | 1417.22          | 1419.85 | 1419.85 | 1419.85 | 1419.88 | 1419.85 | 1419.88 |
| 172.3               | 1439.37          | 1419.09 | 1419.09 | 1419.09 | 1419.13 | 1419.09 | 1419.13 |
| 172.2               | 1389.96          | 1417.37 | 1417.37 | 1417.37 | 1417.42 | 1417.37 | 1417.42 |
| 172.1               | 1362.21          | 1415.14 | 1415.14 | 1415.14 | 1415.21 | 1415.14 | 1415.21 |
| 172                 | 1452.05          | 1412.81 | 1412.81 | 1412.81 | 1412.91 | 1412.81 | 1412.91 |
| 171.9               | 1501.69          | 1410.69 | 1410.69 | 1410.69 | 1410.83 | 1410.69 | 1410.83 |
| 171.8               | 1442.14          | 1409.69 | 1409.69 | 1409.7  | 1409.89 | 1409.69 | 1409.9  |
| 171.7               | 1422.5           | 1409.33 | 1409.33 | 1409.35 | 1409.61 | 1409.33 | 1409.62 |
| 171.6               | 1428.52          | 1408.41 | 1408.41 | 1408.43 | 1408.78 | 1408.41 | 1408.8  |
| 171.5               | 1413.48          | 1407.01 | 1407.01 | 1407.03 | 1407.51 | 1407.01 | 1407.54 |
| 171.4               | 1302.25          | 1404.73 | 1404.73 | 1404.76 | 1405.41 | 1404.73 | 1405.45 |
| 171.3               | 1366.4           | 1402.64 | 1402.64 | 1402.7  | 1403.56 | 1402.64 | 1403.62 |
| 171.2               | 1469.19          | 1401.56 | 1401.56 | 1401.64 | 1402.79 | 1401.56 | 1402.87 |
| 171.1               | 1409.14          | 1400.88 | 1400.88 | 1400.99 | 1402.51 | 1400.88 | 1402.62 |
| 171                 | 1401.88          | 1400.84 | 1400.84 | 1401    | 1402.99 | 1400.84 | 1403.15 |
| 170.9               | 1417.73          | 1400.79 | 1400.79 | 1401.02 | 1403.61 | 1400.79 | 1403.83 |
| 170.8               | 1419.78          | 1400.72 | 1400.72 | 1401.04 | 1404.39 | 1400.72 | 1404.7  |
| 170.7               | 1407.42          | 1400.62 | 1400.62 | 1401.06 | 1405.36 | 1400.62 | 1405.8  |
| 170.6               | 1373.86          | 1400.51 | 1400.51 | 1401.11 | 1406.59 | 1400.51 | 1407.2  |
| 170.5               | 1489.59          | 1400.41 | 1400.41 | 1401.23 | 1408.17 | 1400.41 | 1408.99 |
| 170.4               | 1515.34          | 1400.3  | 1400.3  | 1401.42 | 1410.14 | 1400.3  | 1411.25 |
| 170.3               | 1447.7           | 1400.19 | 1400.19 | 1401.7  | 1412.58 | 1400.19 | 1414.08 |
| 170.2               | 1424.18          | 1400.08 | 1400.08 | 1402.1  | 1415.57 | 1400.08 | 1417.59 |
| 170.1               | 1424.24          | 1399.98 | 1399.98 | 1402.67 | 1419.22 | 1399.98 | 1421.91 |
| 170                 | 1435.17          | 1399.88 | 1399.88 | 1403.45 | 1423.62 | 1399.88 | 1427.19 |
| 169.9               | 1401.92          | 1399.78 | 1399.78 | 1404.47 | 1428.86 | 1399.78 | 1433.55 |
| 169.8               | 1426.27          | 1399.68 | 1399.68 | 1405.81 | 1435.07 | 1399.68 | 1441.19 |
| 169.7               | 1376.17          | 1399.58 | 1399.58 | 1407.53 | 1442.33 | 1399.58 | 1450.28 |
| 169.6               | 1367.28          | 1399.45 | 1399.45 | 1409.71 | 1450.73 | 1399.45 | 1460.99 |
| 169.5               | 1427             | 1399.29 | 1399.29 | 1412.43 | 1460.34 | 1399.29 | 1473.48 |
| 169.4               | 1442.37          | 1399.08 | 1399.08 | 1415.8  | 1471.23 | 1399.08 | 1487.95 |
| 169.3               | 1529.64          | 1398.85 | 1398.85 | 1419.98 | 1483.46 | 1398.85 | 1504.59 |
| 169.2               | 1570.77          | 1398.6  | 1398.6  | 1425.13 | 1497.03 | 1398.6  | 1523.57 |
| 169.1               | 1599.23          | 1398.3  | 1398.3  | 1431.4  | 1511.91 | 1398.3  | 1545    |
| 169                 | 1649.38          | 1397.95 | 1397.95 | 1438.95 | 1527.97 | 1397.95 | 1568.97 |
| 168.9               | 1551.73          | 1397.51 | 1397.52 | 1447.96 | 1545.06 | 1397.51 | 1595.51 |

| Binding energy (eV) | Intensity (a.u.) |         |         |         |         |         |         |
|---------------------|------------------|---------|---------|---------|---------|---------|---------|
|                     | LineA            | LineB   | LineC   | LineD   | LineE   | LineF   | LineG   |
| 168.8               | 1518.68          | 1397    | 1397.01 | 1458.64 | 1562.97 | 1397    | 1624.61 |
| 168.7               | 1609.4           | 1396.41 | 1396.42 | 1471.2  | 1581.4  | 1396.41 | 1656.2  |
| 168.6               | 1689.73          | 1395.75 | 1395.76 | 1485.84 | 1600.01 | 1395.75 | 1690.11 |
| 168.5               | 1736.04          | 1395.01 | 1395.03 | 1502.75 | 1618.38 | 1395.01 | 1726.14 |
| 168.4               | 1807.5           | 1394.19 | 1394.22 | 1522.09 | 1636.03 | 1394.19 | 1763.96 |
| 168.3               | 1836.15          | 1393.3  | 1393.34 | 1543.98 | 1652.47 | 1393.3  | 1803.18 |
| 168.2               | 1904.27          | 1392.31 | 1392.37 | 1568.45 | 1667.13 | 1392.31 | 1843.33 |
| 168.1               | 1927.63          | 1391.21 | 1391.3  | 1595.48 | 1679.5  | 1391.21 | 1883.86 |
| 168                 | 1963.22          | 1390.01 | 1390.14 | 1624.99 | 1689.13 | 1390.01 | 1924.24 |
| 167.9               | 2012.21          | 1388.72 | 1388.9  | 1656.75 | 1695.62 | 1388.72 | 1963.85 |
| 167.8               | 2031.82          | 1387.36 | 1387.61 | 1690.44 | 1698.71 | 1387.35 | 2002.08 |
| 167.7               | 2080.96          | 1385.93 | 1386.3  | 1725.62 | 1698.24 | 1385.92 | 2038.32 |
| 167.6               | 2080.36          | 1384.47 | 1384.98 | 1761.68 | 1694.18 | 1384.45 | 2071.96 |
| 167.5               | 2119.97          | 1382.98 | 1383.69 | 1797.88 | 1686.66 | 1382.95 | 2102.36 |
| 167.4               | 2126.53          | 1381.43 | 1382.43 | 1833.35 | 1675.86 | 1381.39 | 2128.9  |
| 167.3               | 2076.71          | 1379.84 | 1381.21 | 1867.12 | 1662.15 | 1379.78 | 2150.98 |
| 167.2               | 2018.27          | 1378.23 | 1380.11 | 1898.21 | 1645.98 | 1378.15 | 2168.09 |
| 167.1               | 2055.66          | 1376.61 | 1379.16 | 1925.6  | 1627.83 | 1376.48 | 2179.75 |
| 167                 | 2196.34          | 1374.99 | 1378.43 | 1948.33 | 1608.23 | 1374.8  | 2185.57 |
| 166.9               | 2192.63          | 1373.37 | 1377.98 | 1965.52 | 1587.7  | 1373.1  | 2185.27 |
| 166.8               | 2141.61          | 1371.76 | 1377.9  | 1976.49 | 1566.73 | 1371.37 | 2178.76 |
| 166.7               | 2132.91          | 1370.19 | 1378.3  | 1980.76 | 1545.79 | 1369.64 | 2166.14 |
| 166.6               | 2149.7           | 1368.69 | 1379.33 | 1978.12 | 1525.27 | 1367.9  | 2147.71 |
| 166.5               | 2209.61          | 1367.27 | 1381.13 | 1968.58 | 1505.49 | 1366.16 | 2124    |
| 166.4               | 2188.56          | 1365.97 | 1383.9  | 1952.47 | 1486.72 | 1364.42 | 2095.8  |
| 166.3               | 2146.4           | 1364.91 | 1387.92 | 1930.38 | 1469.19 | 1362.75 | 2064.15 |
| 166.2               | 2061.44          | 1364.12 | 1393.44 | 1903.07 | 1453.02 | 1361.14 | 2030.23 |
| 166.1               | 2057.04          | 1363.69 | 1400.77 | 1871.42 | 1438.29 | 1359.61 | 1995.35 |
| 166                 | 1986.31          | 1363.68 | 1410.23 | 1836.41 | 1424.98 | 1358.12 | 1960.94 |
| 165.9               | 1863.33          | 1364.2  | 1422.17 | 1799.06 | 1413.05 | 1356.67 | 1928.47 |
| 165.8               | 1839.53          | 1365.4  | 1437.05 | 1760.38 | 1402.48 | 1355.29 | 1899.45 |
| 165.7               | 1791.46          | 1367.47 | 1455.3  | 1721.32 | 1393.18 | 1353.96 | 1875.37 |
| 165.6               | 1853.87          | 1370.59 | 1477.39 | 1682.69 | 1385.04 | 1352.69 | 1857.65 |
| 165.5               | 1941.36          | 1375.03 | 1503.79 | 1645.2  | 1377.96 | 1351.45 | 1847.62 |
| 165.4               | 1895.17          | 1381.09 | 1534.98 | 1609.42 | 1371.81 | 1350.25 | 1846.56 |
| 165.3               | 1865.48          | 1389.11 | 1571.39 | 1575.74 | 1366.46 | 1349.04 | 1855.59 |
| 165.2               | 1876.93          | 1399.49 | 1613.36 | 1544.43 | 1361.75 | 1347.77 | 1875.72 |
| 165.1               | 1861.14          | 1412.7  | 1661.19 | 1515.63 | 1357.56 | 1346.42 | 1907.83 |
| 165                 | 1902.83          | 1429.33 | 1715.06 | 1489.42 | 1353.79 | 1344.96 | 1952.71 |
| 164.9               | 1985.02          | 1450.05 | 1774.99 | 1465.77 | 1350.34 | 1343.4  | 2010.96 |
| 164.8               | 2128.81          | 1475.61 | 1840.82 | 1444.61 | 1347.14 | 1341.72 | 2083.02 |
| 164.7               | 2251.51          | 1506.77 | 1912.07 | 1425.74 | 1344.09 | 1339.88 | 2169.04 |
| 164.6               | 2300.68          | 1544.39 | 1987.99 | 1408.98 | 1341.08 | 1337.83 | 2268.94 |
| 164.5               | 2376.31          | 1589.38 | 2067.54 | 1394.08 | 1338.03 | 1335.55 | 2382.39 |
| 164.4               | 2473.52          | 1642.65 | 2149.32 | 1380.81 | 1334.89 | 1332.99 | 2508.69 |
| 164.3               | 2706.32          | 1705.12 | 2231.64 | 1368.93 | 1331.57 | 1330.14 | 2646.84 |
| 164.2               | 2878             | 1777.64 | 2312.5  | 1358.22 | 1328.04 | 1326.96 | 2795.51 |
| 164.1               | 3023.09          | 1861    | 2389.72 | 1348.49 | 1324.28 | 1323.48 | 2953.06 |
| 164                 | 3183.06          | 1955.79 | 2460.94 | 1339.58 | 1320.29 | 1319.69 | 3117.52 |
| 163.9               | 3361.38          | 2062.28 | 2523.72 | 1331.26 | 1315.99 | 1315.56 | 3286.59 |
| 163.8               | 3575.3           | 2180.48 | 2575.75 | 1323.37 | 1311.37 | 1311.05 | 3457.82 |
| 163.7               | 3620.56          | 2309.96 | 2614.98 | 1315.8  | 1306.43 | 1306.2  | 3628.58 |
| 163.6               | 3704.18          | 2449.8  | 2639.74 | 1308.42 | 1301.16 | 1300.99 | 3796.14 |
| 163.5               | 4023.78          | 2598.48 | 2648.81 | 1301.13 | 1295.53 | 1295.41 | 3957.72 |



| Binding energy (eV) | Intensity (a.u.) |         |         |         |         |         |         |
|---------------------|------------------|---------|---------|---------|---------|---------|---------|
|                     | LineA            | LineB   | LineC   | LineD   | LineE   | LineF   | LineG   |
| 163.4               | 4156.31          | 2753.91 | 2641.64 | 1293.85 | 1289.56 | 1289.48 | 4110.53 |
| 163.3               | 4161.08          | 2913.35 | 2618.32 | 1286.54 | 1283.28 | 1283.22 | 4251.82 |
| 163.2               | 4422.07          | 3073.43 | 2579.54 | 1279.18 | 1276.72 | 1276.68 | 4378.84 |
| 163.1               | 4675.48          | 3230.26 | 2526.63 | 1271.77 | 1269.93 | 1269.9  | 4488.9  |
| 163                 | 4733.36          | 3379.45 | 2461.32 | 1264.27 | 1262.89 | 1262.87 | 4579.31 |
| 162.9               | 4709.63          | 3516.36 | 2385.74 | 1256.65 | 1255.63 | 1255.62 | 4647.53 |
| 162.8               | 4732.87          | 3636.39 | 2302.3  | 1248.98 | 1248.23 | 1248.22 | 4691.24 |
| 162.7               | 4713.55          | 3735.17 | 2213.42 | 1241.27 | 1240.72 | 1240.71 | 4708.44 |
| 162.6               | 4766.53          | 3808.81 | 2121.49 | 1233.53 | 1233.14 | 1233.13 | 4697.57 |
| 162.5               | 4737.58          | 3854.29 | 2028.76 | 1225.86 | 1225.57 | 1225.57 | 4657.77 |
| 162.4               | 4689.02          | 3869.6  | 1937.26 | 1218.33 | 1218.12 | 1218.12 | 4588.95 |
| 162.3               | 4636.84          | 3853.87 | 1848.64 | 1210.96 | 1210.81 | 1210.81 | 4491.85 |
| 162.2               | 4440.9           | 3807.45 | 1764.22 | 1203.77 | 1203.67 | 1203.67 | 4368.12 |
| 162.1               | 4251.03          | 3732.01 | 1685.07 | 1196.85 | 1196.78 | 1196.78 | 4220.38 |
| 162                 | 4030.35          | 3630.25 | 1611.88 | 1190.23 | 1190.18 | 1190.18 | 4051.99 |
| 161.9               | 3986.42          | 3505.77 | 1545.06 | 1183.95 | 1183.91 | 1183.91 | 3866.95 |
| 161.8               | 3790.2           | 3362.85 | 1484.78 | 1178.03 | 1178.01 | 1178.01 | 3669.64 |
| 161.7               | 3395.96          | 3206.12 | 1431.05 | 1172.54 | 1172.52 | 1172.52 | 3464.66 |
| 161.6               | 3186.97          | 3040.31 | 1383.65 | 1167.48 | 1167.47 | 1167.47 | 3256.5  |
| 161.5               | 3070.18          | 2869.95 | 1342.27 | 1162.88 | 1162.88 | 1162.88 | 3049.35 |
| 161.4               | 2867.22          | 2699.23 | 1306.5  | 1158.74 | 1158.74 | 1158.74 | 2847    |
| 161.3               | 2561.05          | 2531.76 | 1275.83 | 1155.02 | 1155.01 | 1155.01 | 2652.59 |
| 161.2               | 2397.16          | 2370.63 | 1249.79 | 1151.72 | 1151.71 | 1151.71 | 2468.7  |
| 161.1               | 2138.23          | 2218.21 | 1227.87 | 1148.82 | 1148.82 | 1148.82 | 2297.26 |
| 161                 | 1933.73          | 2076.26 | 1209.54 | 1146.29 | 1146.29 | 1146.29 | 2139.51 |
| 160.9               | 1904.8           | 1945.89 | 1194.34 | 1144.07 | 1144.07 | 1144.07 | 1996.16 |
| 160.8               | 1850.83          | 1827.76 | 1181.82 | 1142.15 | 1142.15 | 1142.15 | 1867.43 |
| 160.7               | 1724.59          | 1722    | 1171.6  | 1140.51 | 1140.51 | 1140.51 | 1753.09 |
| 160.6               | 1588.75          | 1628.39 | 1163.29 | 1139.09 | 1139.09 | 1139.09 | 1652.59 |
| 160.5               | 1604.27          | 1546.42 | 1156.58 | 1137.87 | 1137.87 | 1137.87 | 1565.13 |
| 160.4               | 1539.45          | 1475.34 | 1151.16 | 1136.79 | 1136.79 | 1136.79 | 1489.71 |
| 160.3               | 1482.36          | 1414.28 | 1146.78 | 1135.83 | 1135.83 | 1135.83 | 1425.24 |
| 160.2               | 1439.85          | 1362.33 | 1143.28 | 1134.98 | 1134.98 | 1134.98 | 1370.63 |
| 160.1               | 1384.25          | 1318.54 | 1140.48 | 1134.24 | 1134.24 | 1134.24 | 1324.78 |
| 160                 | 1399.73          | 1281.92 | 1138.25 | 1133.58 | 1133.58 | 1133.58 | 1286.58 |
| 159.9               | 1381.58          | 1251.53 | 1136.44 | 1132.98 | 1132.98 | 1132.98 | 1254.99 |
| 159.8               | 1331.29          | 1226.53 | 1135    | 1132.45 | 1132.45 | 1132.45 | 1229.09 |
| 159.7               | 1277.97          | 1206.14 | 1133.86 | 1131.99 | 1131.99 | 1131.99 | 1208.01 |
| 159.6               | 1305.66          | 1189.65 | 1132.97 | 1131.61 | 1131.61 | 1131.61 | 1191.01 |
| 159.5               | 1311.6           | 1176.39 | 1132.26 | 1131.28 | 1131.28 | 1131.28 | 1177.38 |
| 159.4               | 1238.93          | 1165.78 | 1131.66 | 1130.95 | 1130.95 | 1130.95 | 1166.49 |
| 159.3               | 1173.09          | 1157.35 | 1131.14 | 1130.64 | 1130.64 | 1130.64 | 1157.86 |
| 159.2               | 1101.8           | 1150.72 | 1130.73 | 1130.38 | 1130.38 | 1130.38 | 1151.08 |
| 159.1               | 1200.14          | 1145.55 | 1130.4  | 1130.15 | 1130.15 | 1130.15 | 1145.8  |
| 159                 | 1350.87          | 1141.52 | 1130.13 | 1129.95 | 1129.95 | 1129.95 | 1141.7  |
| 158.9               | 1311.84          | 1138.43 | 1129.92 | 1129.8  | 1129.8  | 1129.8  | 1138.55 |
| 158.8               | 1148.14          | 1136.09 | 1129.77 | 1129.69 | 1129.69 | 1129.69 | 1136.17 |
| 158.7               | 1121.53          | 1134.31 | 1129.65 | 1129.59 | 1129.59 | 1129.59 | 1134.37 |
| 158.6               | 1153.08          | 1132.96 | 1129.55 | 1129.51 | 1129.51 | 1129.51 | 1133    |
| 158.5               | 1096.1           | 1131.92 | 1129.44 | 1129.42 | 1129.42 | 1129.42 | 1131.95 |
| 158.4               | 1091.38          | 1131.14 | 1129.35 | 1129.33 | 1129.33 | 1129.33 | 1131.15 |
| 158.3               | 1131.28          | 1130.56 | 1129.28 | 1129.27 | 1129.27 | 1129.27 | 1130.58 |
| 158.2               | 1139.06          | 1130.17 | 1129.25 | 1129.24 | 1129.24 | 1129.24 | 1130.17 |
| 158.1               | 1139.53          | 1129.88 | 1129.23 | 1129.23 | 1129.23 | 1129.23 | 1129.89 |

| Binding energy (eV) | Intensity (a.u.) |         |         |         |         |         |         |
|---------------------|------------------|---------|---------|---------|---------|---------|---------|
|                     | LineA            | LineB   | LineC   | LineD   | LineE   | LineF   | LineG   |
| 158                 | 1187.06          | 1129.68 | 1129.22 | 1129.22 | 1129.22 | 1129.22 | 1129.68 |
| 157.9               | 1196.64          | 1130.19 | 1129.88 | 1129.87 | 1129.87 | 1129.87 | 1130.2  |
| 157.8               | 1148.65          | 1130.75 | 1130.53 | 1130.53 | 1130.53 | 1130.53 | 1130.75 |
| 157.7               | 1085.7           | 1131.33 | 1131.18 | 1131.18 | 1131.18 | 1131.18 | 1131.33 |
| 157.6               | 1097.79          | 1131.94 | 1131.83 | 1131.83 | 1131.83 | 1131.83 | 1131.94 |
| 157.5               | 1108.23          | 1132.56 | 1132.49 | 1132.49 | 1132.49 | 1132.49 | 1132.56 |
| 157.4               | 1108.28          | 1133.19 | 1133.14 | 1133.14 | 1133.14 | 1133.14 | 1133.19 |
| 157.3               | 1178.08          | 1133.83 | 1133.79 | 1133.79 | 1133.79 | 1133.79 | 1133.83 |
| 157.2               | 1232.9           | 1134.47 | 1134.45 | 1134.45 | 1134.45 | 1134.45 | 1134.47 |
| 157.1               | 1298.41          | 1135.12 | 1135.1  | 1135.1  | 1135.1  | 1135.1  | 1135.12 |
| 157                 | 1249.21          | 1135.76 | 1135.76 | 1135.76 | 1135.76 | 1135.76 | 1135.76 |
| 156.9               | 1221.66          | 1136.41 | 1136.41 | 1136.41 | 1136.41 | 1136.41 | 1136.41 |
| 156.8               | 1264.81          | 1137.07 | 1137.06 | 1137.06 | 1137.06 | 1137.06 | 1137.07 |
| 156.7               | 1189.96          | 1137.72 | 1137.72 | 1137.72 | 1137.72 | 1137.72 | 1137.72 |

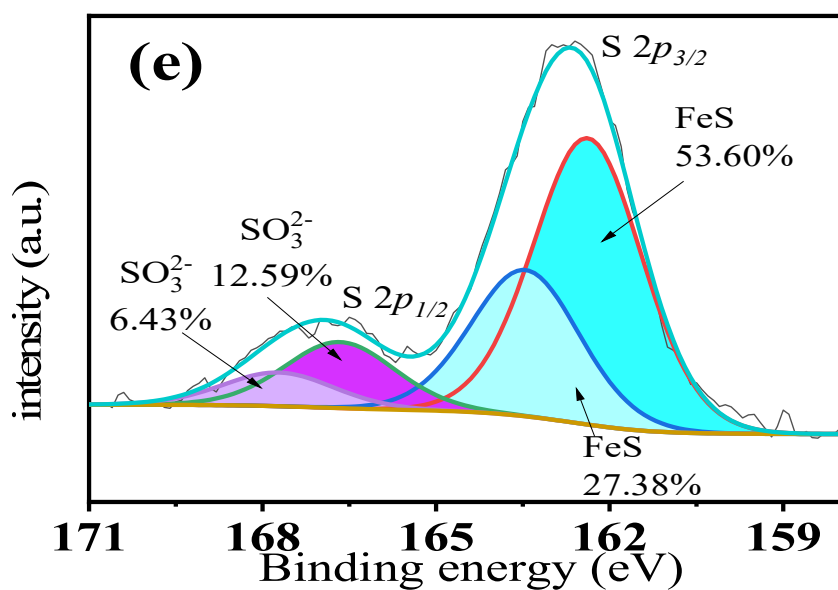

| Binding energy (eV) | Intensity (a.u.) |         |         |         |         |         |         |
|---------------------|------------------|---------|---------|---------|---------|---------|---------|
|                     | LineA            | LineB   | LineC   | LineD   | LineE   | LineF   | LineG   |
| 174.1               | 1475.24          | 1466.03 | 1466.03 | 1466.03 | 1466.03 | 1466.03 | 1466.03 |
| 174                 | 1475.75          | 1462.8  | 1462.8  | 1462.8  | 1462.8  | 1462.8  | 1462.8  |
| 173.9               | 1475.83          | 1458.33 | 1458.33 | 1458.33 | 1458.33 | 1458.33 | 1458.33 |
| 173.8               | 1483.92          | 1452.91 | 1452.91 | 1452.91 | 1452.91 | 1452.91 | 1452.91 |
| 173.7               | 1518.77          | 1446.78 | 1446.78 | 1446.78 | 1446.78 | 1446.78 | 1446.78 |
| 173.6               | 1545.64          | 1440.65 | 1440.65 | 1440.65 | 1440.65 | 1440.65 | 1440.65 |
| 173.5               | 1560             | 1434.76 | 1434.76 | 1434.76 | 1434.76 | 1434.76 | 1434.76 |
| 173.4               | 1545.9           | 1428.79 | 1428.79 | 1428.79 | 1428.79 | 1428.79 | 1428.79 |
| 173.3               | 1526.38          | 1423.06 | 1423.06 | 1423.06 | 1423.06 | 1423.06 | 1423.06 |
| 173.2               | 1449.91          | 1417.2  | 1417.2  | 1417.2  | 1417.2  | 1417.2  | 1417.2  |
| 173.1               | 1410.63          | 1410.51 | 1410.51 | 1410.51 | 1410.51 | 1410.51 | 1410.51 |
| 173                 | 1419.2           | 1403.65 | 1403.65 | 1403.65 | 1403.66 | 1403.65 | 1403.66 |
| 172.9               | 1383.91          | 1397.72 | 1397.72 | 1397.72 | 1397.72 | 1397.72 | 1397.72 |
| 172.8               | 1427.82          | 1392.4  | 1392.4  | 1392.4  | 1392.41 | 1392.4  | 1392.41 |
| 172.7               | 1515.4           | 1387.21 | 1387.21 | 1387.21 | 1387.22 | 1387.21 | 1387.22 |
| 172.6               | 1468.41          | 1382.44 | 1382.44 | 1382.44 | 1382.44 | 1382.44 | 1382.44 |
| 172.5               | 1368.77          | 1378.2  | 1378.2  | 1378.2  | 1378.21 | 1378.2  | 1378.21 |
| 172.4               | 1426.8           | 1374.88 | 1374.88 | 1374.88 | 1374.9  | 1374.88 | 1374.9  |
| 172.3               | 1476.69          | 1371.58 | 1371.58 | 1371.58 | 1371.6  | 1371.58 | 1371.6  |
| 172.2               | 1425.1           | 1367.75 | 1367.75 | 1367.75 | 1367.78 | 1367.75 | 1367.78 |
| 172.1               | 1338.29          | 1364.32 | 1364.32 | 1364.32 | 1364.36 | 1364.32 | 1364.36 |
| 172                 | 1261.85          | 1361.78 | 1361.78 | 1361.78 | 1361.84 | 1361.78 | 1361.84 |
| 171.9               | 1383.32          | 1360.07 | 1360.07 | 1360.07 | 1360.16 | 1360.07 | 1360.16 |
| 171.8               | 1409.41          | 1358.05 | 1358.05 | 1358.05 | 1358.17 | 1358.05 | 1358.17 |
| 171.7               | 1344.7           | 1355.8  | 1355.8  | 1355.81 | 1355.97 | 1355.8  | 1355.98 |
| 171.6               | 1378.29          | 1354.06 | 1354.06 | 1354.07 | 1354.29 | 1354.06 | 1354.3  |
| 171.5               | 1347.36          | 1352.47 | 1352.47 | 1352.49 | 1352.79 | 1352.47 | 1352.81 |
| 171.4               | 1387.1           | 1350.96 | 1350.96 | 1350.99 | 1351.4  | 1350.96 | 1351.42 |
| 171.3               | 1432.3           | 1349.72 | 1349.72 | 1349.76 | 1350.31 | 1349.72 | 1350.34 |
| 171.2               | 1396.79          | 1349.11 | 1349.11 | 1349.16 | 1349.9  | 1349.11 | 1349.95 |
| 171.1               | 1390.45          | 1349.09 | 1349.09 | 1349.16 | 1350.14 | 1349.09 | 1350.2  |
| 171                 | 1313.87          | 1349.07 | 1349.07 | 1349.16 | 1350.45 | 1349.07 | 1350.55 |
| 170.9               | 1216.84          | 1349.04 | 1349.04 | 1349.18 | 1350.86 | 1349.04 | 1351    |
| 170.8               | 1298.85          | 1348.99 | 1348.99 | 1349.18 | 1351.38 | 1348.99 | 1351.58 |
| 170.7               | 1333.72          | 1348.94 | 1348.94 | 1349.21 | 1352.05 | 1348.94 | 1352.32 |
| 170.6               | 1345.79          | 1348.88 | 1348.88 | 1349.25 | 1352.91 | 1348.88 | 1353.28 |
| 170.5               | 1401.13          | 1348.81 | 1348.81 | 1349.33 | 1353.99 | 1348.81 | 1354.5  |
| 170.4               | 1435.17          | 1348.75 | 1348.75 | 1349.45 | 1355.36 | 1348.75 | 1356.06 |
| 170.3               | 1423.41          | 1348.67 | 1348.67 | 1349.62 | 1357.06 | 1348.67 | 1358.01 |
| 170.2               | 1445.97          | 1348.55 | 1348.55 | 1349.83 | 1359.12 | 1348.55 | 1360.41 |
| 170.1               | 1454.85          | 1348.41 | 1348.41 | 1350.13 | 1361.65 | 1348.41 | 1363.37 |
| 170                 | 1366.98          | 1348.25 | 1348.25 | 1350.54 | 1364.73 | 1348.25 | 1367.02 |
| 169.9               | 1390.69          | 1348.07 | 1348.07 | 1351.11 | 1368.44 | 1348.07 | 1371.48 |
| 169.8               | 1419.7           | 1347.88 | 1347.88 | 1351.87 | 1372.89 | 1347.88 | 1376.88 |
| 169.7               | 1404.1           | 1347.69 | 1347.69 | 1352.89 | 1378.19 | 1347.69 | 1383.4  |
| 169.6               | 1420.98          | 1347.48 | 1347.48 | 1354.24 | 1384.42 | 1347.48 | 1391.18 |
| 169.5               | 1454.17          | 1347.27 | 1347.27 | 1356    | 1391.71 | 1347.27 | 1400.43 |
| 169.4               | 1458.17          | 1347.08 | 1347.08 | 1358.26 | 1400.14 | 1347.08 | 1411.33 |
| 169.3               | 1471.23          | 1346.86 | 1346.86 | 1361.11 | 1409.78 | 1346.86 | 1424.03 |
| 169.2               | 1481.78          | 1346.63 | 1346.63 | 1364.66 | 1420.7  | 1346.63 | 1438.73 |
| 169.1               | 1411.22          | 1346.39 | 1346.39 | 1369.06 | 1432.91 | 1346.39 | 1455.58 |
| 169                 | 1413.25          | 1346.09 | 1346.09 | 1374.41 | 1446.38 | 1346.09 | 1474.7  |
| 168.9               | 1464.12          | 1345.73 | 1345.73 | 1380.88 | 1461.07 | 1345.73 | 1496.22 |
| 168.8               | 1447.72          | 1345.35 | 1345.35 | 1388.67 | 1476.92 | 1345.35 | 1520.25 |

| Binding energy (eV) | Intensity (a.u.) |         |         |         |         |         |         |
|---------------------|------------------|---------|---------|---------|---------|---------|---------|
|                     | LineA            | LineB   | LineC   | LineD   | LineE   | LineF   | LineG   |
| 168.7               | 1511.2           | 1344.95 | 1344.95 | 1398    | 1493.78 | 1344.95 | 1546.83 |
| 168.6               | 1687.85          | 1344.51 | 1344.51 | 1409.03 | 1511.42 | 1344.51 | 1575.94 |
| 168.5               | 1692.98          | 1344.02 | 1344.03 | 1421.95 | 1529.53 | 1344.02 | 1607.46 |
| 168.4               | 1581.88          | 1343.45 | 1343.45 | 1436.92 | 1547.75 | 1343.45 | 1641.22 |
| 168.3               | 1567.63          | 1342.8  | 1342.8  | 1454.11 | 1565.66 | 1342.8  | 1676.98 |
| 168.2               | 1628.61          | 1342.06 | 1342.06 | 1473.66 | 1582.82 | 1342.06 | 1714.42 |
| 168.1               | 1756.46          | 1341.22 | 1341.22 | 1495.65 | 1598.7  | 1341.22 | 1753.14 |
| 168                 | 1826.78          | 1340.27 | 1340.27 | 1520.12 | 1612.82 | 1340.27 | 1792.69 |
| 167.9               | 1842.23          | 1339.22 | 1339.24 | 1547.06 | 1624.71 | 1339.22 | 1832.56 |
| 167.8               | 1882.71          | 1338.14 | 1338.16 | 1576.39 | 1633.98 | 1338.14 | 1872.25 |
| 167.7               | 1966.65          | 1336.98 | 1337.01 | 1607.85 | 1640.23 | 1336.98 | 1911.13 |
| 167.6               | 2084.13          | 1335.71 | 1335.76 | 1641.06 | 1643.14 | 1335.71 | 1948.54 |
| 167.5               | 2124.1           | 1334.35 | 1334.42 | 1675.57 | 1642.6  | 1334.35 | 1983.89 |
| 167.4               | 1912.73          | 1332.92 | 1333.03 | 1710.8  | 1638.58 | 1332.92 | 2016.56 |
| 167.3               | 1943.01          | 1331.44 | 1331.59 | 1746.02 | 1631.19 | 1331.43 | 2045.93 |
| 167.2               | 2139.77          | 1329.9  | 1330.13 | 1780.41 | 1620.67 | 1329.9  | 2071.42 |
| 167.1               | 2075.59          | 1328.33 | 1328.66 | 1813.07 | 1607.34 | 1328.32 | 2092.43 |
| 167                 | 2081.39          | 1326.73 | 1327.21 | 1843.04 | 1591.63 | 1326.72 | 2108.44 |
| 166.9               | 2121.6           | 1325.13 | 1325.81 | 1869.37 | 1574.02 | 1325.11 | 2118.99 |
| 166.8               | 2077.29          | 1323.55 | 1324.51 | 1891.16 | 1555.03 | 1323.52 | 2123.69 |
| 166.7               | 2051.97          | 1321.93 | 1323.28 | 1907.57 | 1535.09 | 1321.89 | 2122.22 |
| 166.6               | 2106.06          | 1320.29 | 1322.18 | 1917.93 | 1514.69 | 1320.22 | 2114.43 |
| 166.5               | 2096.32          | 1318.68 | 1321.3  | 1921.87 | 1494.3  | 1318.57 | 2100.43 |
| 166.4               | 2034.63          | 1317.11 | 1320.7  | 1919.16 | 1474.31 | 1316.95 | 2080.44 |
| 166.3               | 2093.34          | 1315.58 | 1320.48 | 1909.85 | 1455.02 | 1315.34 | 2054.92 |
| 166.2               | 2106.92          | 1314.12 | 1320.74 | 1894.25 | 1436.71 | 1313.76 | 2024.53 |
| 166.1               | 2002.24          | 1312.76 | 1321.63 | 1872.87 | 1419.55 | 1312.23 | 1990.1  |
| 166                 | 1978.63          | 1311.51 | 1323.3  | 1846.43 | 1403.68 | 1310.75 | 1952.67 |
| 165.9               | 1961.42          | 1310.44 | 1325.97 | 1815.81 | 1389.18 | 1309.34 | 1913.37 |
| 165.8               | 1912.14          | 1309.57 | 1329.86 | 1781.94 | 1376.08 | 1308.01 | 1873.43 |
| 165.7               | 1857.19          | 1308.98 | 1335.23 | 1745.8  | 1364.36 | 1306.75 | 1834.12 |
| 165.6               | 1772.96          | 1308.72 | 1342.4  | 1708.35 | 1353.98 | 1305.58 | 1796.7  |
| 165.5               | 1744.46          | 1308.85 | 1351.68 | 1670.46 | 1344.85 | 1304.47 | 1762.42 |
| 165.4               | 1672.84          | 1309.46 | 1363.41 | 1632.9  | 1336.84 | 1303.39 | 1732.44 |
| 165.3               | 1600.68          | 1310.7  | 1378.02 | 1596.39 | 1329.87 | 1302.36 | 1707.92 |
| 165.2               | 1670.99          | 1312.78 | 1395.97 | 1561.5  | 1323.88 | 1301.4  | 1689.95 |
| 165.1               | 1768.81          | 1315.88 | 1417.67 | 1528.64 | 1318.73 | 1300.48 | 1679.49 |
| 165                 | 1849.14          | 1320.26 | 1443.52 | 1498.1  | 1314.29 | 1299.58 | 1677.42 |
| 164.9               | 1722.06          | 1326.22 | 1473.88 | 1470.05 | 1310.48 | 1298.69 | 1684.55 |
| 164.8               | 1564.48          | 1334.12 | 1509.04 | 1444.55 | 1307.15 | 1297.77 | 1701.54 |
| 164.7               | 1696.31          | 1344.4  | 1549.18 | 1421.57 | 1304.21 | 1296.8  | 1728.97 |
| 164.6               | 1722.61          | 1357.57 | 1594.31 | 1401.01 | 1301.55 | 1295.72 | 1767.27 |
| 164.5               | 1736.91          | 1374.24 | 1644.26 | 1382.75 | 1299.09 | 1294.55 | 1816.71 |
| 164.4               | 1892.5           | 1395.1  | 1698.67 | 1366.64 | 1296.79 | 1293.27 | 1877.4  |
| 164.3               | 1951.76          | 1420.92 | 1756.84 | 1352.5  | 1294.6  | 1291.89 | 1949.21 |
| 164.2               | 2081.15          | 1452.47 | 1817.75 | 1340.08 | 1292.43 | 1290.35 | 2031.68 |
| 164.1               | 2205.62          | 1490.56 | 1880.04 | 1329.14 | 1290.2  | 1288.62 | 2124.09 |
| 164                 | 2263.74          | 1536.04 | 1942.11 | 1319.49 | 1287.88 | 1286.69 | 2225.45 |
| 163.9               | 2377.93          | 1589.72 | 2002.06 | 1310.94 | 1285.46 | 1284.57 | 2334.48 |
| 163.8               | 2491.67          | 1652.28 | 2057.81 | 1303.3  | 1282.9  | 1282.23 | 2449.61 |
| 163.7               | 2585.9           | 1724.28 | 2107.21 | 1296.4  | 1280.17 | 1279.68 | 2569.03 |
| 163.6               | 2667.89          | 1805.98 | 2148.17 | 1290.09 | 1277.27 | 1276.9  | 2690.8  |
| 163.5               | 2701.29          | 1897.35 | 2178.8  | 1284.24 | 1274.17 | 1273.9  | 2812.84 |
| 163.4               | 2815.46          | 1997.92 | 2197.59 | 1278.74 | 1270.89 | 1270.7  | 2933.05 |

| Binding energy (eV) | Intensity (a.u.) |         |         |         |         |         |         |
|---------------------|------------------|---------|---------|---------|---------|---------|---------|
|                     | LineA            | LineB   | LineC   | LineD   | LineE   | LineF   | LineG   |
| 163.3               | 2975.91          | 2106.7  | 2203.47 | 1273.46 | 1267.38 | 1267.24 | 3049.29 |
| 163.2               | 3085.66          | 2222.11 | 2196.01 | 1268.31 | 1263.63 | 1263.53 | 3159.47 |
| 163.1               | 3168.33          | 2342.02 | 2175.41 | 1263.27 | 1259.69 | 1259.62 | 3261.54 |
| 163                 | 3271.88          | 2463.64 | 2142.48 | 1258.28 | 1255.56 | 1255.51 | 3353.44 |
| 162.9               | 3513.64          | 2583.57 | 2098.56 | 1253.29 | 1251.24 | 1251.2  | 3433.05 |
| 162.8               | 3623.4           | 2697.97 | 2045.37 | 1248.27 | 1246.73 | 1246.7  | 3498.24 |
| 162.7               | 3528.32          | 2802.71 | 1984.95 | 1243.18 | 1242.03 | 1242.01 | 3546.83 |
| 162.6               | 3558.72          | 2893.62 | 1919.49 | 1238.05 | 1237.2  | 1237.18 | 3576.81 |
| 162.5               | 3626.17          | 2966.81 | 1851.16 | 1232.9  | 1232.28 | 1232.27 | 3586.35 |
| 162.4               | 3649.31          | 3018.9  | 1781.99 | 1227.79 | 1227.33 | 1227.33 | 3574.04 |
| 162.3               | 3732.99          | 3047.29 | 1713.75 | 1222.72 | 1222.39 | 1222.38 | 3539    |
| 162.2               | 3670.37          | 3050.47 | 1647.94 | 1217.74 | 1217.5  | 1217.5  | 3481.16 |
| 162.1               | 3463.83          | 3028.12 | 1585.73 | 1212.91 | 1212.74 | 1212.73 | 3401.3  |
| 162                 | 3267.82          | 2981.1  | 1527.98 | 1208.25 | 1208.12 | 1208.12 | 3301.09 |
| 161.9               | 3230.78          | 2911.46 | 1475.23 | 1203.8  | 1203.72 | 1203.71 | 3183.07 |
| 161.8               | 3154.2           | 2822.18 | 1427.77 | 1199.61 | 1199.55 | 1199.55 | 3050.47 |
| 161.7               | 2957.26          | 2716.96 | 1385.65 | 1195.68 | 1195.64 | 1195.64 | 2907.01 |
| 161.6               | 2699.51          | 2599.92 | 1348.77 | 1192.08 | 1192.05 | 1192.05 | 2756.68 |
| 161.5               | 2459.17          | 2475.3  | 1316.89 | 1188.82 | 1188.8  | 1188.8  | 2603.42 |
| 161.4               | 2358.11          | 2347.15 | 1289.63 | 1185.88 | 1185.86 | 1185.86 | 2450.93 |
| 161.3               | 2238.49          | 2219.12 | 1266.55 | 1183.23 | 1183.22 | 1183.22 | 2302.46 |
| 161.2               | 2088.49          | 2094.41 | 1247.21 | 1180.88 | 1180.88 | 1180.88 | 2160.75 |
| 161.1               | 1902.78          | 1975.59 | 1231.19 | 1178.84 | 1178.83 | 1178.83 | 2027.96 |
| 161                 | 1774.57          | 1864.57 | 1218.04 | 1177.06 | 1177.05 | 1177.05 | 1905.56 |
| 160.9               | 1744.96          | 1762.68 | 1207.34 | 1175.53 | 1175.53 | 1175.53 | 1794.5  |
| 160.8               | 1678.65          | 1670.66 | 1198.71 | 1174.21 | 1174.21 | 1174.21 | 1695.16 |
| 160.7               | 1591.96          | 1588.75 | 1191.77 | 1173.06 | 1173.06 | 1173.06 | 1607.45 |
| 160.6               | 1563.84          | 1516.82 | 1186.21 | 1172.04 | 1172.04 | 1172.04 | 1530.99 |
| 160.5               | 1382.01          | 1454.47 | 1181.77 | 1171.13 | 1171.13 | 1171.13 | 1465.11 |
| 160.4               | 1347.43          | 1401.05 | 1178.23 | 1170.29 | 1170.29 | 1170.29 | 1408.98 |
| 160.3               | 1516.27          | 1355.79 | 1175.38 | 1169.52 | 1169.52 | 1169.52 | 1361.65 |
| 160.2               | 1542.32          | 1317.87 | 1173.11 | 1168.81 | 1168.81 | 1168.81 | 1322.17 |
| 160.1               | 1533.18          | 1286.42 | 1171.28 | 1168.16 | 1168.16 | 1168.16 | 1289.55 |
| 160                 | 1495.2           | 1260.58 | 1169.8  | 1167.54 | 1167.54 | 1167.54 | 1262.84 |
| 159.9               | 1462.14          | 1239.57 | 1168.61 | 1166.99 | 1166.99 | 1166.99 | 1241.19 |
| 159.8               | 1383.23          | 1222.61 | 1167.6  | 1166.45 | 1166.45 | 1166.45 | 1223.76 |
| 159.7               | 1402.44          | 1209.03 | 1166.74 | 1165.93 | 1165.93 | 1165.93 | 1209.84 |
| 159.6               | 1373.41          | 1198.28 | 1166.04 | 1165.48 | 1165.48 | 1165.48 | 1198.84 |
| 159.5               | 1246.09          | 1189.85 | 1165.48 | 1165.09 | 1165.09 | 1165.09 | 1190.24 |
| 159.4               | 1288.34          | 1183.3  | 1165.03 | 1164.76 | 1164.76 | 1164.76 | 1183.57 |
| 159.3               | 1263.71          | 1178.25 | 1164.66 | 1164.47 | 1164.47 | 1164.47 | 1178.43 |
| 159.2               | 1176.3           | 1174.39 | 1164.37 | 1164.24 | 1164.24 | 1164.24 | 1174.52 |
| 159.1               | 1201.65          | 1171.48 | 1164.14 | 1164.05 | 1164.05 | 1164.05 | 1171.56 |
| 159                 | 1219.53          | 1169.29 | 1163.96 | 1163.91 | 1163.91 | 1163.91 | 1169.35 |
| 158.9               | 1243.34          | 1167.67 | 1163.84 | 1163.8  | 1163.8  | 1163.8  | 1167.71 |
| 158.8               | 1200.39          | 1166.48 | 1163.74 | 1163.71 | 1163.71 | 1163.71 | 1166.5  |
| 158.7               | 1158.01          | 1165.6  | 1163.66 | 1163.64 | 1163.64 | 1163.64 | 1165.61 |
| 158.6               | 1184.86          | 1164.96 | 1163.6  | 1163.59 | 1163.59 | 1163.59 | 1164.97 |
| 158.5               | 1161.12          | 1164.49 | 1163.54 | 1163.54 | 1163.54 | 1163.54 | 1164.5  |
| 158.4               | 1163.46          | 1164.16 | 1163.5  | 1163.5  | 1163.5  | 1163.5  | 1164.16 |
| 158.3               | 1194.53          | 1163.93 | 1163.48 | 1163.48 | 1163.48 | 1163.48 | 1163.93 |
| 158.2               | 1184.67          | 1163.78 | 1163.47 | 1163.47 | 1163.47 | 1163.47 | 1163.78 |
| 158.1               | 1154.44          | 1167.67 | 1167.46 | 1167.46 | 1167.46 | 1167.46 | 1167.67 |
| 158                 | 1125.43          | 1171.6  | 1171.46 | 1171.46 | 1171.46 | 1171.46 | 1171.6  |

| Binding energy (eV) | Intensity (a.u.) |         |         |         |         |         |         |
|---------------------|------------------|---------|---------|---------|---------|---------|---------|
|                     | LineA            | LineB   | LineC   | LineD   | LineE   | LineF   | LineG   |
| 157.9               | 1144.41          | 1175.55 | 1175.46 | 1175.46 | 1175.46 | 1175.46 | 1175.55 |
| 157.8               | 1169.44          | 1179.51 | 1179.45 | 1179.45 | 1179.45 | 1179.45 | 1179.52 |
| 157.7               | 1157.77          | 1183.49 | 1183.45 | 1183.45 | 1183.45 | 1183.45 | 1183.49 |
| 157.6               | 1179.77          | 1187.47 | 1187.45 | 1187.45 | 1187.45 | 1187.45 | 1187.47 |
| 157.5               | 1195.93          | 1191.46 | 1191.44 | 1191.44 | 1191.44 | 1191.44 | 1191.46 |
| 157.4               | 1250.66          | 1195.45 | 1195.44 | 1195.44 | 1195.44 | 1195.44 | 1195.45 |
| 157.3               | 1266.32          | 1199.44 | 1199.44 | 1199.44 | 1199.44 | 1199.44 | 1199.44 |
| 157.2               | 1198.67          | 1203.44 | 1203.43 | 1203.43 | 1203.43 | 1203.43 | 1203.44 |
| 157.1               | 1205.99          | 1207.43 | 1207.43 | 1207.43 | 1207.43 | 1207.43 | 1207.43 |
| 157                 | 1204.18          | 1211.43 | 1211.43 | 1211.43 | 1211.43 | 1211.43 | 1211.43 |
| 156.9               | 1138.41          | 1215.43 | 1215.43 | 1215.43 | 1215.43 | 1215.43 | 1215.43 |
| 156.8               | 1157.68          | 1219.42 | 1219.42 | 1219.42 | 1219.42 | 1219.42 | 1219.42 |
| 156.7               | 1228.66          | 1223.42 | 1223.42 | 1223.42 | 1223.42 | 1223.42 | 1223.42 |
| 156.6               | 1227.21          | 1227.42 | 1227.42 | 1227.42 | 1227.42 | 1227.42 | 1227.42 |
| 156.5               | 1230.7           | 1231.41 | 1231.41 | 1231.41 | 1231.41 | 1231.41 | 1231.41 |
| 156.4               | 1263.04          | 1235.41 | 1235.41 | 1235.41 | 1235.41 | 1235.41 | 1235.41 |

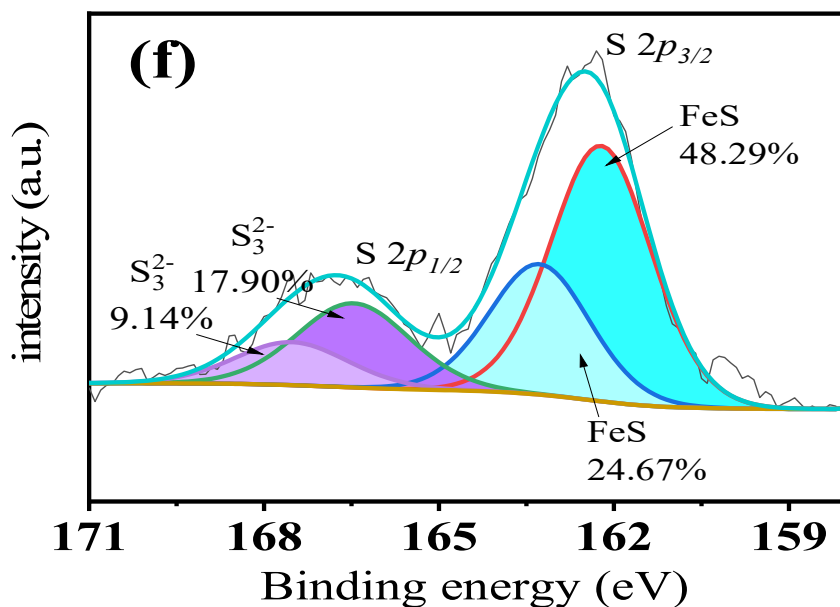

| Binding energy (eV) | Intensity (a.u.) |         |         |         |         |         |         |         |
|---------------------|------------------|---------|---------|---------|---------|---------|---------|---------|
|                     | LineA            | LineB   | LineC   | LineD   | LineE   | LineF   | LineG   | LineH   |
| 728.7               | 9796.43          | 9796.43 | 9796.43 | 9796.43 | 9796.43 | 9796.43 | 9796.43 | 9796.43 |
| 728.6               | 9857.87          | 9795.38 | 9796.09 | 9795.38 | 9871.32 | 9795.38 | 9795.38 | 9872.03 |
| 728.5               | 9955.79          | 9793.79 | 9794.69 | 9793.79 | 9879.69 | 9793.79 | 9793.79 | 9880.59 |
| 728.4               | 9703.75          | 9791.82 | 9792.96 | 9791.82 | 9888.68 | 9791.82 | 9791.82 | 9889.81 |
| 728.3               | 9744.83          | 9789.94 | 9791.36 | 9789.94 | 9898.77 | 9789.94 | 9789.94 | 9900.2  |
| 728.2               | 9939.71          | 9788.33 | 9790.12 | 9788.33 | 9910.21 | 9788.33 | 9788.33 | 9912    |
| 728.1               | 10145.3          | 9786.77 | 9789    | 9786.77 | 9922.8  | 9786.77 | 9786.77 | 9925.03 |
| 728                 | 10116.8          | 9784.94 | 9787.72 | 9784.94 | 9936.22 | 9784.94 | 9784.94 | 9939    |
| 727.9               | 9803.66          | 9783.05 | 9786.5  | 9783.05 | 9950.71 | 9783.05 | 9783.05 | 9954.16 |
| 727.8               | 9589.93          | 9781.06 | 9785.32 | 9781.06 | 9966.2  | 9781.06 | 9781.06 | 9970.46 |
| 727.7               | 9779.34          | 9778.6  | 9783.85 | 9778.6  | 9982.29 | 9778.6  | 9778.6  | 9987.54 |
| 727.6               | 9967.1           | 9775.83 | 9782.28 | 9775.83 | 9999.1  | 9775.83 | 9775.83 | 10005.5 |
| 727.5               | 9873.08          | 9773.14 | 9781.03 | 9773.14 | 10016.9 | 9773.14 | 9773.14 | 10024.8 |
| 727.4               | 10018.5          | 9770.58 | 9780.19 | 9770.58 | 10035.7 | 9770.58 | 9770.58 | 10045.4 |
| 727.3               | 10139.2          | 9768.05 | 9779.74 | 9768.05 | 10055.3 | 9768.05 | 9768.05 | 10067   |
| 727.2               | 10009.7          | 9765.28 | 9779.43 | 9765.28 | 10075.2 | 9765.28 | 9765.28 | 10089.4 |
| 727.1               | 9811.9           | 9762.02 | 9779.1  | 9762.02 | 10095.1 | 9762.02 | 9762.02 | 10112.2 |
| 727                 | 9966.99          | 9758.52 | 9779.05 | 9758.52 | 10114.9 | 9758.52 | 9758.52 | 10135.4 |
| 726.9               | 10028.3          | 9754.63 | 9779.23 | 9754.63 | 10134.3 | 9754.63 | 9754.63 | 10158.9 |
| 726.8               | 10008.1          | 9750.21 | 9779.59 | 9750.21 | 10152.9 | 9750.21 | 9750.21 | 10182.3 |
| 726.7               | 10034.6          | 9745.76 | 9780.72 | 9745.76 | 10170.9 | 9745.76 | 9745.76 | 10205.9 |
| 726.6               | 9975.7           | 9741.51 | 9782.98 | 9741.51 | 10188.4 | 9741.51 | 9741.51 | 10229.9 |
| 726.5               | 10298.6          | 9737.26 | 9786.27 | 9737.26 | 10204.8 | 9737.26 | 9737.26 | 10253.8 |
| 726.4               | 10353.1          | 9732.73 | 9790.44 | 9732.73 | 10219.5 | 9732.73 | 9732.73 | 10277.2 |
| 726.3               | 9989.49          | 9727.78 | 9795.49 | 9727.78 | 10232.2 | 9727.78 | 9727.78 | 10299.9 |
| 726.2               | 9863.77          | 9722.46 | 9801.63 | 9722.46 | 10242.6 | 9722.46 | 9722.46 | 10321.8 |
| 726.1               | 9945.48          | 9716.82 | 9809.04 | 9716.82 | 10250.5 | 9716.82 | 9716.82 | 10342.7 |
| 726                 | 10040.4          | 9710.82 | 9817.87 | 9710.82 | 10255.7 | 9710.82 | 9710.82 | 10362.7 |
| 725.9               | 10325.1          | 9704.46 | 9828.26 | 9704.46 | 10257.9 | 9704.46 | 9704.46 | 10381.7 |
| 725.8               | 10329.6          | 9698.07 | 9840.71 | 9698.07 | 10257.4 | 9698.07 | 9698.07 | 10400   |
| 725.7               | 10266.6          | 9691.68 | 9855.41 | 9691.68 | 10254   | 9691.68 | 9691.68 | 10417.8 |
| 725.6               | 10320.6          | 9684.82 | 9872.05 | 9684.82 | 10247.4 | 9684.82 | 9684.82 | 10434.6 |
| 725.5               | 10257.4          | 9677.36 | 9890.65 | 9677.36 | 10237.2 | 9677.36 | 9677.36 | 10450.5 |
| 725.4               | 10252.1          | 9669.45 | 9911.47 | 9669.45 | 10223.8 | 9669.45 | 9669.45 | 10465.8 |
| 725.3               | 10273.3          | 9661.18 | 9934.72 | 9661.18 | 10207.2 | 9661.19 | 9661.18 | 10480.8 |
| 725.2               | 10383.4          | 9652.76 | 9960.68 | 9652.76 | 10188   | 9652.76 | 9652.76 | 10495.9 |
| 725.1               | 10377.6          | 9644.14 | 9989.34 | 9644.14 | 10166.1 | 9644.14 | 9644.14 | 10511.3 |
| 725                 | 10320.6          | 9635.07 | 10020.5 | 9635.07 | 10141.5 | 9635.07 | 9635.07 | 10526.9 |
| 724.9               | 10298.5          | 9625.49 | 10053.9 | 9625.49 | 10114.6 | 9625.49 | 9625.49 | 10543   |
| 724.8               | 10386.7          | 9615.57 | 10089.8 | 9615.57 | 10085.6 | 9615.57 | 9615.57 | 10559.8 |
| 724.7               | 10436.9          | 9605.28 | 10127.9 | 9605.28 | 10054.8 | 9605.29 | 9605.28 | 10577.4 |
| 724.6               | 10609.5          | 9594.51 | 10167.8 | 9594.51 | 10022.4 | 9594.51 | 9594.51 | 10595.7 |
| 724.5               | 10743.2          | 9583.51 | 10209.6 | 9583.51 | 9988.99 | 9583.51 | 9583.51 | 10615   |
| 724.4               | 10481.1          | 9572.37 | 10252.8 | 9572.37 | 9954.87 | 9572.38 | 9572.37 | 10635.3 |
| 724.3               | 10517.9          | 9561.03 | 10297   | 9561.03 | 9920.25 | 9561.04 | 9561.03 | 10656.2 |
| 724.2               | 10650.8          | 9549.24 | 10341.3 | 9549.24 | 9885.15 | 9549.25 | 9549.24 | 10677.2 |
| 724.1               | 10490.3          | 9537.09 | 10385.2 | 9537.09 | 9849.87 | 9537.11 | 9537.09 | 10698   |
| 724                 | 10395.2          | 9524.81 | 10428.3 | 9524.81 | 9814.83 | 9524.82 | 9524.81 | 10718.4 |
| 723.9               | 10404.2          | 9512.52 | 10469.9 | 9512.52 | 9780.36 | 9512.54 | 9512.52 | 10737.8 |
| 723.8               | 10628.7          | 9500.42 | 10509.5 | 9500.42 | 9746.8  | 9500.45 | 9500.42 | 10755.9 |
| 723.7               | 10620.1          | 9488.31 | 10546   | 9488.31 | 9714.05 | 9488.34 | 9488.31 | 10771.8 |
| 723.6               | 10446.4          | 9476.22 | 10578.7 | 9476.22 | 9682.26 | 9476.26 | 9476.22 | 10784.8 |
| 723.5               | 10476.9          | 9464.23 | 10606.9 | 9464.23 | 9651.59 | 9464.28 | 9464.23 | 10794.3 |
| 723.4               | 10411.2          | 9451.96 | 10629.5 | 9451.96 | 9621.71 | 9452.03 | 9451.96 | 10799.3 |
| 723.3               | 10370.7          | 9439.27 | 10645.6 | 9439.27 | 9592.51 | 9439.36 | 9439.27 | 10798.9 |
| 723.2               | 10367.4          | 9426.45 | 10655   | 9426.45 | 9564.29 | 9426.56 | 9426.45 | 10792.9 |
| 723.1               | 10409.5          | 9413.81 | 10657.5 | 9413.81 | 9537.37 | 9413.94 | 9413.81 | 10781.2 |

| Binding energy (eV) | Intensity (a.u.) |         |         |         |         |         |         |         |
|---------------------|------------------|---------|---------|---------|---------|---------|---------|---------|
|                     | LineA            | LineB   | LineC   | LineD   | LineE   | LineF   | LineG   | LineH   |
| 723                 | 10646.7          | 9401.23 | 10652.8 | 9401.23 | 9511.61 | 9401.4  | 9401.23 | 10763.4 |
| 722.9               | 10690.2          | 9388.68 | 10640.7 | 9388.68 | 9486.95 | 9388.89 | 9388.68 | 10739.1 |
| 722.8               | 10393.8          | 9376.23 | 10621.1 | 9376.23 | 9463.43 | 9376.5  | 9376.23 | 10708.6 |
| 722.7               | 10319.9          | 9363.93 | 10594.4 | 9363.93 | 9441.04 | 9364.25 | 9363.93 | 10671.8 |
| 722.6               | 10410.6          | 9351.68 | 10560.6 | 9351.68 | 9419.66 | 9352.08 | 9351.68 | 10629   |
| 722.5               | 10294.3          | 9339.48 | 10520.3 | 9339.48 | 9399.22 | 9339.98 | 9339.48 | 10580.5 |
| 722.4               | 10229.2          | 9327.61 | 10474.2 | 9327.61 | 9379.93 | 9328.21 | 9327.61 | 10527.1 |
| 722.3               | 10136.4          | 9316.28 | 10423.2 | 9316.28 | 9361.96 | 9317.03 | 9316.28 | 10469.7 |
| 722.2               | 10174.2          | 9305.6  | 10368.2 | 9305.6  | 9345.36 | 9306.51 | 9305.6  | 10408.9 |
| 722.1               | 10192.2          | 9295.49 | 10309.8 | 9295.49 | 9329.99 | 9296.6  | 9295.49 | 10345.4 |
| 722                 | 9948.9           | 9285.88 | 10248.8 | 9285.88 | 9315.73 | 9287.23 | 9285.88 | 10280   |
| 721.9               | 9959.11          | 9276.79 | 10186   | 9276.79 | 9302.53 | 9278.42 | 9276.79 | 10213.4 |
| 721.8               | 9913.36          | 9268.15 | 10122.1 | 9268.15 | 9290.28 | 9270.12 | 9268.15 | 10146.2 |
| 721.7               | 9699.7           | 9260.09 | 10058   | 9260.09 | 9279.06 | 9262.47 | 9260.09 | 10079.4 |
| 721.6               | 9688.11          | 9252.66 | 9994.45 | 9252.66 | 9268.88 | 9255.52 | 9252.66 | 10013.5 |
| 721.5               | 9786.27          | 9245.86 | 9932.04 | 9245.86 | 9259.68 | 9249.27 | 9245.86 | 9949.27 |
| 721.4               | 9731.36          | 9239.55 | 9871.23 | 9239.55 | 9251.29 | 9243.62 | 9239.55 | 9887.04 |
| 721.3               | 9534.47          | 9233.64 | 9812.4  | 9233.64 | 9243.58 | 9238.49 | 9233.64 | 9827.19 |
| 721.2               | 9403.28          | 9228.17 | 9755.99 | 9228.17 | 9236.57 | 9233.92 | 9228.17 | 9770.14 |
| 721.1               | 9453.15          | 9222.95 | 9702.13 | 9222.95 | 9230.01 | 9229.75 | 9222.95 | 9716.01 |
| 721                 | 9607.2           | 9217.91 | 9651.02 | 9217.91 | 9223.84 | 9225.93 | 9217.91 | 9664.98 |
| 720.9               | 9461.54          | 9213.1  | 9602.87 | 9213.1  | 9218.07 | 9222.54 | 9213.1  | 9617.27 |
| 720.8               | 9434.34          | 9208.61 | 9557.89 | 9208.61 | 9212.76 | 9219.67 | 9208.61 | 9573.09 |
| 720.7               | 9598.61          | 9204.42 | 9516.11 | 9204.42 | 9207.87 | 9217.35 | 9204.42 | 9532.49 |
| 720.6               | 9436.11          | 9200.27 | 9477.27 | 9200.27 | 9203.13 | 9215.34 | 9200.27 | 9495.2  |
| 720.5               | 9383.58          | 9195.94 | 9441.13 | 9195.94 | 9198.31 | 9213.45 | 9195.94 | 9461.01 |
| 720.4               | 9401.05          | 9191.4  | 9407.57 | 9191.4  | 9193.36 | 9211.68 | 9191.4  | 9429.8  |
| 720.3               | 9357.38          | 9186.85 | 9376.69 | 9186.85 | 9188.46 | 9210.27 | 9186.85 | 9401.72 |
| 720.2               | 9440.52          | 9182.28 | 9348.36 | 9182.28 | 9183.6  | 9209.24 | 9182.28 | 9376.64 |
| 720.1               | 9516.41          | 9177.64 | 9322.38 | 9177.64 | 9178.71 | 9208.58 | 9177.64 | 9354.39 |
| 720                 | 9609.61          | 9173.13 | 9298.8  | 9173.13 | 9174.01 | 9208.53 | 9173.13 | 9335.08 |
| 719.9               | 9552.6           | 9168.67 | 9277.38 | 9168.67 | 9169.39 | 9209.04 | 9168.67 | 9318.46 |
| 719.8               | 9411.79          | 9164.27 | 9257.96 | 9164.27 | 9164.85 | 9210.16 | 9164.27 | 9304.43 |
| 719.7               | 9450.19          | 9159.81 | 9240.27 | 9159.82 | 9160.28 | 9211.82 | 9159.81 | 9292.74 |
| 719.6               | 9388.3           | 9155.13 | 9223.97 | 9155.14 | 9155.51 | 9213.86 | 9155.13 | 9283.09 |
| 719.5               | 9327.74          | 9150.36 | 9209.05 | 9150.37 | 9150.66 | 9216.48 | 9150.36 | 9275.48 |
| 719.4               | 9262.55          | 9145.69 | 9195.55 | 9145.71 | 9145.94 | 9219.87 | 9145.69 | 9269.99 |
| 719.3               | 9385.18          | 9141.26 | 9183.46 | 9141.27 | 9141.45 | 9224.2  | 9141.26 | 9266.61 |
| 719.2               | 9528.66          | 9136.92 | 9172.52 | 9136.94 | 9137.07 | 9229.34 | 9136.92 | 9265.12 |
| 719.1               | 9461.69          | 9132.5  | 9162.43 | 9132.53 | 9132.63 | 9235.13 | 9132.5  | 9265.2  |
| 719                 | 9342.4           | 9128.07 | 9153.14 | 9128.1  | 9128.17 | 9241.61 | 9128.07 | 9266.81 |
| 718.9               | 9312.88          | 9123.61 | 9144.54 | 9123.66 | 9123.69 | 9248.78 | 9123.61 | 9269.83 |
| 718.8               | 9386.86          | 9119.05 | 9136.46 | 9119.11 | 9119.11 | 9256.53 | 9119.05 | 9274.05 |
| 718.7               | 9423.78          | 9114.36 | 9128.79 | 9114.43 | 9114.4  | 9264.78 | 9114.36 | 9279.33 |
| 718.6               | 9410.33          | 9109.5  | 9121.43 | 9109.6  | 9109.54 | 9273.46 | 9109.5  | 9285.51 |
| 718.5               | 9341.74          | 9104.6  | 9114.41 | 9104.72 | 9104.62 | 9282.6  | 9104.6  | 9292.57 |
| 718.4               | 9373.1           | 9099.66 | 9107.72 | 9099.82 | 9099.69 | 9292.15 | 9099.66 | 9300.38 |
| 718.3               | 9331.32          | 9094.65 | 9101.24 | 9094.85 | 9094.67 | 9301.94 | 9094.65 | 9308.74 |
| 718.2               | 9478.98          | 9089.51 | 9094.88 | 9089.76 | 9089.52 | 9311.81 | 9089.51 | 9317.44 |
| 718.1               | 9517.25          | 9084.32 | 9088.67 | 9084.63 | 9084.33 | 9321.7  | 9084.31 | 9326.39 |
| 718                 | 9415.29          | 9079.26 | 9082.79 | 9079.66 | 9079.27 | 9331.65 | 9079.26 | 9335.58 |
| 717.9               | 9357.62          | 9074.29 | 9077.13 | 9074.78 | 9074.3  | 9341.44 | 9074.29 | 9344.78 |
| 717.8               | 9371.29          | 9069.29 | 9071.58 | 9069.91 | 9069.3  | 9350.78 | 9069.29 | 9353.69 |
| 717.7               | 9372.64          | 9064.34 | 9066.17 | 9065.11 | 9064.34 | 9359.57 | 9064.34 | 9362.18 |
| 717.6               | 9207.7           | 9059.33 | 9060.79 | 9060.28 | 9059.33 | 9367.52 | 9059.33 | 9369.94 |
| 717.5               | 9258.74          | 9054.4  | 9055.56 | 9055.57 | 9054.4  | 9374.58 | 9054.39 | 9376.92 |
| 717.4               | 9296.83          | 9049.55 | 9050.47 | 9051    | 9049.55 | 9380.58 | 9049.55 | 9382.96 |



| Binding energy (eV) | Intensity (a.u.) |         |         |         |         |         |         |         |
|---------------------|------------------|---------|---------|---------|---------|---------|---------|---------|
|                     | LineA            | LineB   | LineC   | LineD   | LineE   | LineF   | LineG   | LineH   |
| 717.3               | 9259.41          | 9044.7  | 9045.42 | 9046.48 | 9044.7  | 9385.26 | 9044.69 | 9387.78 |
| 717.2               | 9322.47          | 9039.7  | 9040.27 | 9041.88 | 9039.7  | 9388.32 | 9039.7  | 9391.09 |
| 717.1               | 9327.39          | 9034.42 | 9034.86 | 9037.08 | 9034.41 | 9389.51 | 9034.41 | 9392.64 |
| 717                 | 9359.98          | 9029.04 | 9029.38 | 9032.28 | 9029.03 | 9388.87 | 9029.03 | 9392.49 |
| 716.9               | 9353.98          | 9023.54 | 9023.8  | 9027.47 | 9023.52 | 9386.33 | 9023.52 | 9390.57 |
| 716.8               | 9437.85          | 9017.92 | 9018.11 | 9022.68 | 9017.89 | 9381.82 | 9017.89 | 9386.84 |
| 716.7               | 9587.97          | 9012.16 | 9012.29 | 9017.91 | 9012.13 | 9375.3  | 9012.13 | 9381.28 |
| 716.6               | 9407.95          | 9006.21 | 9006.3  | 9013.14 | 9006.17 | 9366.76 | 9006.17 | 9373.89 |
| 716.5               | 9254.76          | 9000.29 | 9000.34 | 9008.61 | 9000.24 | 9356.42 | 9000.24 | 9364.94 |
| 716.4               | 9307.61          | 8994.32 | 8994.32 | 9004.26 | 8994.25 | 9344.3  | 8994.25 | 9354.46 |
| 716.3               | 9364.44          | 8988.28 | 8988.25 | 9000.15 | 8988.19 | 9330.49 | 8988.19 | 9342.6  |
| 716.2               | 9369.4           | 8982.28 | 8982.21 | 8996.4  | 8982.17 | 9315.22 | 8982.17 | 9329.61 |
| 716.1               | 9226.13          | 8976.39 | 8976.27 | 8993.13 | 8976.24 | 9298.69 | 8976.24 | 9315.77 |
| 716                 | 9308.28          | 8970.79 | 8970.61 | 8990.57 | 8970.58 | 9281.26 | 8970.58 | 9301.48 |
| 715.9               | 9349.58          | 8965.25 | 8965.01 | 8988.57 | 8964.99 | 9262.89 | 8964.99 | 9286.75 |
| 715.8               | 9238.84          | 8959.49 | 8959.16 | 8986.89 | 8959.15 | 9243.45 | 8959.15 | 9271.54 |
| 715.7               | 9262.76          | 8953.47 | 8953.03 | 8985.56 | 8953.02 | 9223.08 | 8953.02 | 9256.07 |
| 715.6               | 9229.32          | 8947.41 | 8946.84 | 8984.87 | 8946.84 | 9202.21 | 8946.84 | 9240.82 |
| 715.5               | 9275.39          | 8941.44 | 8940.72 | 8985.06 | 8940.71 | 9181.12 | 8940.71 | 9226.2  |
| 715.4               | 9428.38          | 8935.29 | 8934.36 | 8985.89 | 8934.36 | 9159.68 | 8934.36 | 9212.16 |
| 715.3               | 9518.86          | 8928.94 | 8927.75 | 8987.47 | 8927.75 | 9138.04 | 8927.75 | 9198.95 |
| 715.2               | 9349.37          | 8922.49 | 8920.98 | 8989.96 | 8920.98 | 9116.4  | 8920.98 | 9186.9  |
| 715.1               | 9222.44          | 8915.87 | 8913.96 | 8993.4  | 8913.96 | 9094.83 | 8913.96 | 9176.18 |
| 715                 | 9384.69          | 8909.17 | 8906.77 | 8997.96 | 8906.77 | 9073.5  | 8906.77 | 9167.1  |
| 714.9               | 9477.55          | 8902.44 | 8899.42 | 9003.79 | 8899.42 | 9052.5  | 8899.42 | 9159.89 |
| 714.8               | 9437.65          | 8895.73 | 8891.95 | 9011.01 | 8891.95 | 9031.96 | 8891.95 | 9154.81 |
| 714.7               | 9398.51          | 8888.98 | 8884.26 | 9019.66 | 8884.26 | 9011.84 | 8884.26 | 9151.95 |
| 714.6               | 9358.35          | 8882.2  | 8876.34 | 9029.82 | 8876.34 | 8992.16 | 8876.34 | 9151.49 |
| 714.5               | 9296.88          | 8875.43 | 8868.17 | 9041.57 | 8868.17 | 8972.92 | 8868.17 | 9153.58 |
| 714.4               | 9307.67          | 8868.77 | 8859.82 | 9055.08 | 8859.82 | 8954.22 | 8859.82 | 9158.44 |
| 714.3               | 9558.44          | 8862.54 | 8851.52 | 9070.67 | 8851.52 | 8936.3  | 8851.52 | 9166.47 |
| 714.2               | 9661.33          | 8856.87 | 8843.36 | 9088.48 | 8843.36 | 8919.23 | 8843.36 | 9177.87 |
| 714.1               | 9511.55          | 8851.67 | 8835.16 | 9108.39 | 8835.16 | 8902.83 | 8835.16 | 9192.57 |
| 714                 | 9309.29          | 8846.89 | 8826.79 | 9130.29 | 8826.79 | 8886.95 | 8826.79 | 9210.55 |
| 713.9               | 9227.98          | 8842.6  | 8818.21 | 9154.12 | 8818.21 | 8871.51 | 8818.21 | 9231.81 |
| 713.8               | 9243.08          | 8838.66 | 8809.17 | 9179.61 | 8809.17 | 8856.24 | 8809.17 | 9256.17 |
| 713.7               | 9377.29          | 8835.14 | 8799.6  | 9206.62 | 8799.6  | 8841.03 | 8799.6  | 9283.58 |
| 713.6               | 9470.28          | 8832.34 | 8789.66 | 9235.18 | 8789.66 | 8826.01 | 8789.66 | 9314.21 |
| 713.5               | 9483.16          | 8830.64 | 8779.57 | 9265.36 | 8779.57 | 8811.36 | 8779.57 | 9348.22 |
| 713.4               | 9657.18          | 8830.26 | 8769.35 | 9296.98 | 8769.35 | 8797.07 | 8769.35 | 9385.61 |
| 713.3               | 9745.13          | 8831.07 | 8758.69 | 9329.47 | 8758.69 | 8782.78 | 8758.69 | 9425.94 |
| 713.2               | 9821.08          | 8833.1  | 8747.39 | 9362.32 | 8747.39 | 8768.26 | 8747.39 | 9468.91 |
| 713.1               | 9705.78          | 8836.45 | 8735.3  | 9395.05 | 8735.3  | 8753.34 | 8735.3  | 9514.24 |
| 713                 | 9527.11          | 8841.55 | 8722.61 | 9427.43 | 8722.61 | 8738.14 | 8722.61 | 9561.9  |
| 712.9               | 9647.22          | 8848.79 | 8709.43 | 9459.13 | 8709.43 | 8722.77 | 8709.43 | 9611.82 |
| 712.8               | 9763.17          | 8858.36 | 8695.66 | 9489.55 | 8695.66 | 8707.07 | 8695.66 | 9663.67 |
| 712.7               | 9908.9           | 8870.55 | 8681.28 | 9518.18 | 8681.28 | 8691.03 | 8681.28 | 9717.19 |
| 712.6               | 9865.74          | 8885.55 | 8666.19 | 9544.35 | 8666.19 | 8674.48 | 8666.19 | 9772.01 |
| 712.5               | 9827.59          | 8903.92 | 8650.61 | 9567.76 | 8650.61 | 8657.64 | 8650.61 | 9828.1  |
| 712.4               | 9947.71          | 8925.93 | 8634.5  | 9587.79 | 8634.5  | 8640.45 | 8634.5  | 9885.17 |
| 712.3               | 10122.7          | 8951.71 | 8617.69 | 9603.75 | 8617.69 | 8622.71 | 8617.69 | 9942.79 |
| 712.2               | 10330            | 8981.55 | 8600.18 | 9615.14 | 8600.18 | 8604.4  | 8600.18 | 10000.7 |
| 712.1               | 10156.8          | 9015.78 | 8582.02 | 9621.53 | 8582.02 | 8585.56 | 8582.02 | 10058.8 |
| 712                 | 10080.8          | 9054.8  | 8563.39 | 9622.71 | 8563.39 | 8566.34 | 8563.39 | 10117.1 |
| 711.9               | 10081.6          | 9098.77 | 8544.25 | 9618.3  | 8544.25 | 8546.71 | 8544.25 | 10175.3 |
| 711.8               | 10186.2          | 9147.7  | 8524.51 | 9607.95 | 8524.51 | 8526.56 | 8524.51 | 10233.2 |
| 711.7               | 10243.6          | 9201.47 | 8503.97 | 9591.31 | 8503.97 | 8505.67 | 8503.97 | 10290.5 |

| Binding energy (eV) | Intensity (a.u.) |         |         |         |         |         |         |         |
|---------------------|------------------|---------|---------|---------|---------|---------|---------|---------|
|                     | LineA            | LineB   | LineC   | LineD   | LineE   | LineF   | LineG   | LineH   |
| 711.6               | 10211.4          | 9260.03 | 8482.64 | 9568.3  | 8482.64 | 8484.04 | 8482.64 | 10347.1 |
| 711.5               | 10193            | 9323.48 | 8460.76 | 9539.21 | 8460.76 | 8461.91 | 8460.76 | 10403.1 |
| 711.4               | 10253.4          | 9391.39 | 8438.13 | 9503.97 | 8438.13 | 8439.08 | 8438.13 | 10458.2 |
| 711.3               | 10558.4          | 9463.23 | 8414.62 | 9462.65 | 8414.62 | 8415.4  | 8414.62 | 10512   |
| 711.2               | 10733.5          | 9538.51 | 8390.27 | 9415.6  | 8390.27 | 8390.9  | 8390.27 | 10564.5 |
| 711.1               | 10684            | 9616.42 | 8364.94 | 9363.06 | 8364.94 | 8365.46 | 8364.94 | 10615.1 |
| 711                 | 10696.6          | 9696.14 | 8338.62 | 9305.45 | 8338.62 | 8339.04 | 8338.62 | 10663.4 |
| 710.9               | 10758.6          | 9776.88 | 8311.5  | 9243.47 | 8311.5  | 8311.84 | 8311.5  | 10709.2 |
| 710.8               | 10716.2          | 9857.44 | 8283.51 | 9177.58 | 8283.51 | 8283.79 | 8283.51 | 10751.8 |
| 710.7               | 10944.9          | 9936.46 | 8254.55 | 9108.19 | 8254.55 | 8254.77 | 8254.55 | 10790.3 |
| 710.6               | 11013.1          | 10013   | 8225    | 9036.27 | 8225    | 8225.18 | 8225    | 10824.4 |
| 710.5               | 10774.2          | 10085.6 | 8195.06 | 8962.54 | 8195.06 | 8195.2  | 8195.06 | 10853.3 |
| 710.4               | 10815.3          | 10152.9 | 8164.69 | 8887.51 | 8164.69 | 8164.81 | 8164.69 | 10875.9 |
| 710.3               | 10985.4          | 10213.4 | 8133.97 | 8811.74 | 8133.97 | 8134.06 | 8133.97 | 10891.3 |
| 710.2               | 10882.2          | 10265.2 | 8102.68 | 8735.48 | 8102.68 | 8102.75 | 8102.68 | 10898.1 |
| 710.1               | 10864.1          | 10307   | 8070.84 | 8659.18 | 8070.84 | 8070.89 | 8070.84 | 10895.4 |
| 710                 | 10831.9          | 10337.9 | 8038.97 | 8583.72 | 8038.97 | 8039.02 | 8038.97 | 10882.7 |
| 709.9               | 10782.3          | 10356.7 | 8007.16 | 8509.51 | 8007.16 | 8007.19 | 8007.16 | 10859.1 |
| 709.8               | 11056.5          | 10362.3 | 7975.15 | 8436.58 | 7975.15 | 7975.18 | 7975.15 | 10823.7 |
| 709.7               | 10982.2          | 10353.9 | 7943.01 | 8365.2  | 7943.01 | 7943.03 | 7943.01 | 10776.1 |
| 709.6               | 10678.6          | 10331.3 | 7910.99 | 8295.82 | 7910.99 | 7911    | 7910.99 | 10716.1 |
| 709.5               | 10675.1          | 10294.4 | 7879.14 | 8228.61 | 7879.14 | 7879.15 | 7879.14 | 10643.9 |
| 709.4               | 10675.8          | 10243.4 | 7847.66 | 8163.87 | 7847.66 | 7847.67 | 7847.66 | 10559.6 |
| 709.3               | 10665.2          | 10178.9 | 7816.63 | 8101.7  | 7816.63 | 7816.63 | 7816.63 | 10464   |
| 709.2               | 10578.4          | 10101.6 | 7786.07 | 8042.18 | 7786.07 | 7786.08 | 7786.07 | 10357.7 |
| 709.1               | 10410.4          | 10012.7 | 7756.41 | 7985.69 | 7756.41 | 7756.41 | 7756.41 | 10242   |
| 709                 | 10198.3          | 9913.53 | 7727.71 | 7932.28 | 7727.71 | 7727.72 | 7727.71 | 10118.1 |
| 708.9               | 10105.5          | 9805.28 | 7699.87 | 7881.78 | 7699.87 | 7699.88 | 7699.87 | 9987.19 |
| 708.8               | 10010.9          | 9689.46 | 7672.96 | 7834.18 | 7672.96 | 7672.96 | 7672.96 | 9850.68 |
| 708.7               | 9884.96          | 9567.83 | 7647.21 | 7789.63 | 7647.21 | 7647.21 | 7647.21 | 9710.25 |
| 708.6               | 9727.24          | 9442.27 | 7622.95 | 7748.35 | 7622.95 | 7622.95 | 7622.95 | 9567.67 |
| 708.5               | 9553.93          | 9314.27 | 7600.11 | 7710.17 | 7600.11 | 7600.11 | 7600.11 | 9424.33 |
| 708.4               | 9492.43          | 9185.27 | 7578.67 | 7674.96 | 7578.67 | 7578.67 | 7578.67 | 9281.56 |
| 708.3               | 9244.33          | 9056.74 | 7558.65 | 7642.63 | 7558.65 | 7558.65 | 7558.65 | 9140.72 |
| 708.2               | 8933.31          | 8929.94 | 7540.04 | 7613.06 | 7540.04 | 7540.05 | 7540.04 | 9002.96 |
| 708.1               | 8913.25          | 8806.15 | 7522.95 | 7586.24 | 7522.95 | 7522.95 | 7522.95 | 8869.44 |
| 708                 | 8797.46          | 8686.43 | 7507.42 | 7562.1  | 7507.42 | 7507.42 | 7507.42 | 8741.12 |
| 707.9               | 8557.8           | 8571.56 | 7493.34 | 7540.45 | 7493.34 | 7493.34 | 7493.34 | 8618.67 |
| 707.8               | 8491.47          | 8462.1  | 7480.58 | 7521.04 | 7480.58 | 7480.58 | 7480.58 | 8502.56 |
| 707.7               | 8311.11          | 8358.57 | 7469.08 | 7503.73 | 7469.08 | 7469.08 | 7469.08 | 8393.22 |
| 707.6               | 8155.38          | 8261.24 | 7458.69 | 7488.27 | 7458.69 | 7458.69 | 7458.69 | 8290.82 |
| 707.5               | 8110.16          | 8170.29 | 7449.29 | 7474.46 | 7449.29 | 7449.29 | 7449.29 | 8195.46 |
| 707.4               | 8089.28          | 8085.97 | 7440.97 | 7462.33 | 7440.97 | 7440.97 | 7440.97 | 8107.34 |
| 707.3               | 8096.57          | 8008.39 | 7433.75 | 7451.83 | 7433.75 | 7433.75 | 7433.75 | 8026.46 |
| 707.2               | 8025.64          | 7937.39 | 7427.53 | 7442.78 | 7427.53 | 7427.53 | 7427.53 | 7952.64 |
| 707.1               | 7833.03          | 7872.6  | 7422.02 | 7434.85 | 7422.02 | 7422.02 | 7422.02 | 7885.43 |
| 707                 | 7731.02          | 7813.36 | 7416.74 | 7427.5  | 7416.74 | 7416.74 | 7416.74 | 7824.12 |
| 706.9               | 7602.23          | 7759.37 | 7411.59 | 7420.59 | 7411.59 | 7411.59 | 7411.59 | 7768.36 |
| 706.8               | 7484.04          | 7710.46 | 7406.67 | 7414.17 | 7406.67 | 7406.67 | 7406.67 | 7717.95 |
| 706.7               | 7716.49          | 7666.41 | 7402.06 | 7408.3  | 7402.06 | 7402.06 | 7402.06 | 7672.65 |
| 706.6               | 8033.65          | 7627.06 | 7397.88 | 7403.04 | 7397.88 | 7397.88 | 7397.88 | 7632.22 |
| 706.5               | 7968.45          | 7592.03 | 7394.08 | 7398.35 | 7394.08 | 7394.08 | 7394.08 | 7596.3  |
| 706.4               | 7832.62          | 7560.91 | 7390.56 | 7394.08 | 7390.56 | 7390.56 | 7390.56 | 7564.43 |
| 706.3               | 7732.95          | 7533.26 | 7387.18 | 7390.07 | 7387.18 | 7387.18 | 7387.18 | 7536.15 |
| 706.2               | 7624.17          | 7508.6  | 7383.8  | 7386.17 | 7383.8  | 7383.8  | 7383.8  | 7510.97 |
| 706.1               | 7597.86          | 7486.61 | 7380.36 | 7382.3  | 7380.36 | 7380.36 | 7380.36 | 7488.55 |
| 706                 | 7512.33          | 7467.33 | 7377.19 | 7378.77 | 7377.19 | 7377.19 | 7377.19 | 7468.9  |

| Binding energy (eV) | Intensity (a.u.) |         |         |         |         |         |         |         |
|---------------------|------------------|---------|---------|---------|---------|---------|---------|---------|
|                     | LineA            | LineB   | LineC   | LineD   | LineE   | LineF   | LineG   | LineH   |
| 705.9               | 7555.52          | 7450.58 | 7374.39 | 7375.67 | 7374.39 | 7374.39 | 7374.39 | 7451.86 |
| 705.8               | 7582.32          | 7436.15 | 7371.96 | 7373    | 7371.96 | 7371.96 | 7371.96 | 7437.18 |
| 705.7               | 7505.32          | 7423.72 | 7369.84 | 7370.68 | 7369.84 | 7369.84 | 7369.84 | 7424.55 |
| 705.6               | 7417.88          | 7413.03 | 7367.96 | 7368.63 | 7367.96 | 7367.96 | 7367.96 | 7413.7  |
| 705.5               | 7366.21          | 7366.21 | 7366.21 | 7366.21 | 7366.21 | 7366.21 | 7366.21 | 7366.21 |

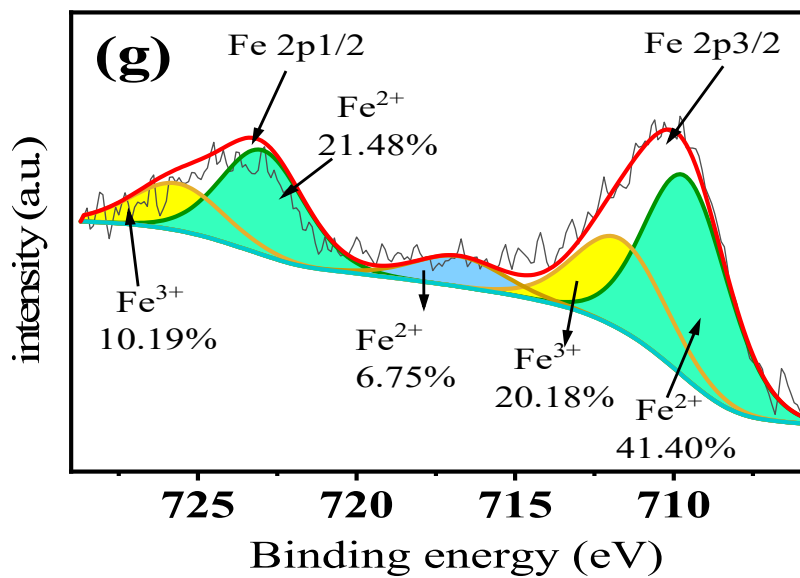

| Binding energy (eV) | Intensity (a.u.) |         |         |         |         |         |         |         |
|---------------------|------------------|---------|---------|---------|---------|---------|---------|---------|
|                     | LineA            | LineB   | LineC   | LineD   | LineE   | LineF   | LineG   | LineH   |
| 730                 | 9242.22          | 9147.76 | 9147.76 | 9147.76 | 9150.15 | 9147.76 | 9147.76 | 9150.15 |
| 729.9               | 9343.29          | 9144.51 | 9144.51 | 9144.51 | 9147.38 | 9144.51 | 9144.51 | 9147.39 |
| 729.8               | 9360.92          | 9141.65 | 9141.66 | 9141.65 | 9145.11 | 9141.65 | 9141.65 | 9145.11 |
| 729.7               | 9267.41          | 9138.98 | 9138.99 | 9138.98 | 9143.12 | 9138.98 | 9138.98 | 9143.12 |
| 729.6               | 9250.03          | 9136.43 | 9136.44 | 9136.43 | 9141.37 | 9136.43 | 9136.43 | 9141.38 |
| 729.5               | 9186.04          | 9133.84 | 9133.86 | 9133.84 | 9139.72 | 9133.84 | 9133.84 | 9139.74 |
| 729.4               | 9131.44          | 9131.05 | 9131.07 | 9131.05 | 9138.03 | 9131.05 | 9131.05 | 9138.05 |
| 729.3               | 9243.04          | 9128.75 | 9128.77 | 9128.75 | 9137    | 9128.75 | 9128.75 | 9137.03 |
| 729.2               | 9182.43          | 9127.13 | 9127.15 | 9127.13 | 9136.87 | 9127.13 | 9127.13 | 9136.9  |
| 729.1               | 9185.94          | 9126.03 | 9126.07 | 9126.03 | 9137.5  | 9126.03 | 9126.03 | 9137.53 |
| 729                 | 9217.09          | 9125.36 | 9125.4  | 9125.36 | 9138.8  | 9125.36 | 9125.36 | 9138.85 |
| 728.9               | 9012.99          | 9125.15 | 9125.21 | 9125.15 | 9140.88 | 9125.15 | 9125.15 | 9140.94 |
| 728.8               | 9040.23          | 9124.94 | 9125.02 | 9124.94 | 9143.27 | 9124.94 | 9124.94 | 9143.35 |
| 728.7               | 9127.27          | 9124.54 | 9124.64 | 9124.54 | 9145.85 | 9124.54 | 9124.54 | 9145.94 |
| 728.6               | 9087.29          | 9124.03 | 9124.15 | 9124.03 | 9148.72 | 9124.03 | 9124.03 | 9148.84 |
| 728.5               | 9047.47          | 9123.57 | 9123.73 | 9123.57 | 9152.09 | 9123.57 | 9123.57 | 9152.25 |
| 728.4               | 9101.51          | 9123.15 | 9123.35 | 9123.15 | 9156    | 9123.15 | 9123.15 | 9156.2  |
| 728.3               | 9422.34          | 9122.67 | 9122.93 | 9122.67 | 9160.39 | 9122.67 | 9122.67 | 9160.64 |
| 728.2               | 9409.64          | 9121.98 | 9122.3  | 9121.98 | 9165.15 | 9121.98 | 9121.98 | 9165.47 |
| 728.1               | 9091.4           | 9121.22 | 9121.61 | 9121.22 | 9170.47 | 9121.22 | 9121.22 | 9170.86 |
| 728                 | 9101.15          | 9120.45 | 9120.94 | 9120.45 | 9176.46 | 9120.45 | 9120.45 | 9176.96 |
| 727.9               | 9306.5           | 9119.6  | 9120.22 | 9119.6  | 9183.1  | 9119.6  | 9119.6  | 9183.72 |
| 727.8               | 9342.58          | 9118.6  | 9119.37 | 9118.6  | 9190.35 | 9118.6  | 9118.6  | 9191.12 |
| 727.7               | 9145.08          | 9117.5  | 9118.46 | 9117.5  | 9198.31 | 9117.5  | 9117.5  | 9199.26 |
| 727.6               | 9116.63          | 9116.52 | 9117.69 | 9116.52 | 9207.22 | 9116.52 | 9116.52 | 9208.39 |
| 727.5               | 9194.75          | 9115.65 | 9117.09 | 9115.65 | 9217.11 | 9115.65 | 9115.65 | 9218.56 |
| 727.4               | 9282.76          | 9114.73 | 9116.49 | 9114.73 | 9227.84 | 9114.73 | 9114.73 | 9229.61 |
| 727.3               | 9242.93          | 9113.64 | 9115.81 | 9113.64 | 9239.3  | 9113.64 | 9113.64 | 9241.47 |
| 727.2               | 9226.71          | 9112.55 | 9115.18 | 9112.55 | 9251.65 | 9112.55 | 9112.55 | 9254.28 |
| 727.1               | 9205.65          | 9111.49 | 9114.69 | 9111.49 | 9264.91 | 9111.49 | 9111.49 | 9268.11 |
| 727                 | 9157.16          | 9110.31 | 9114.18 | 9110.31 | 9278.9  | 9110.31 | 9110.31 | 9282.77 |
| 726.9               | 9343.25          | 9109.01 | 9113.69 | 9109.01 | 9293.57 | 9109.01 | 9109.01 | 9298.25 |
| 726.8               | 9307.7           | 9107.55 | 9113.18 | 9107.55 | 9308.83 | 9107.55 | 9107.55 | 9314.45 |
| 726.7               | 9268.09          | 9105.9  | 9112.64 | 9105.9  | 9324.53 | 9105.9  | 9105.9  | 9331.28 |
| 726.6               | 9327.26          | 9104.11 | 9112.17 | 9104.11 | 9340.66 | 9104.11 | 9104.11 | 9348.72 |
| 726.5               | 9282.33          | 9102.19 | 9111.79 | 9102.19 | 9357.08 | 9102.19 | 9102.19 | 9366.68 |
| 726.4               | 9432.89          | 9100.16 | 9111.57 | 9100.16 | 9373.67 | 9100.16 | 9100.16 | 9385.07 |
| 726.3               | 9580.28          | 9098.07 | 9111.57 | 9098.07 | 9390.3  | 9098.07 | 9098.07 | 9403.81 |
| 726.2               | 9427.31          | 9095.95 | 9111.89 | 9095.95 | 9406.84 | 9095.95 | 9095.95 | 9422.78 |
| 726.1               | 9416.11          | 9093.74 | 9112.5  | 9093.74 | 9423.01 | 9093.74 | 9093.74 | 9441.77 |
| 726                 | 9357.75          | 9091.42 | 9113.41 | 9091.42 | 9438.58 | 9091.42 | 9091.42 | 9460.57 |
| 725.9               | 9230.84          | 9088.99 | 9114.7  | 9088.99 | 9453.34 | 9088.99 | 9088.99 | 9479.04 |
| 725.8               | 9355.6           | 9086.41 | 9116.36 | 9086.41 | 9466.99 | 9086.41 | 9086.41 | 9496.93 |
| 725.7               | 9422.04          | 9083.74 | 9118.51 | 9083.74 | 9479.38 | 9083.74 | 9083.74 | 9514.16 |
| 725.6               | 9432.61          | 9081.15 | 9121.39 | 9081.15 | 9490.46 | 9081.15 | 9081.15 | 9530.71 |
| 725.5               | 9454.23          | 9078.52 | 9124.94 | 9078.52 | 9499.9  | 9078.52 | 9078.52 | 9546.32 |
| 725.4               | 9511.72          | 9075.69 | 9129.05 | 9075.69 | 9507.34 | 9075.69 | 9075.69 | 9560.71 |
| 725.3               | 9537.04          | 9072.62 | 9133.76 | 9072.62 | 9512.58 | 9072.62 | 9072.62 | 9573.72 |
| 725.2               | 9428.2           | 9069.3  | 9139.1  | 9069.3  | 9515.45 | 9069.3  | 9069.3  | 9585.26 |
| 725.1               | 9447.88          | 9065.85 | 9145.28 | 9065.85 | 9515.99 | 9065.85 | 9065.85 | 9595.42 |
| 725                 | 9714.45          | 9062.48 | 9152.53 | 9062.48 | 9514.32 | 9062.48 | 9062.48 | 9604.37 |
| 724.9               | 9696.91          | 9059.13 | 9160.88 | 9059.13 | 9510.36 | 9059.13 | 9059.13 | 9612.1  |
| 724.8               | 9607.4           | 9055.8  | 9170.33 | 9055.8  | 9504.11 | 9055.8  | 9055.8  | 9618.64 |
| 724.7               | 9506.86          | 9052.46 | 9180.92 | 9052.46 | 9495.61 | 9052.46 | 9052.46 | 9624.06 |
| 724.6               | 9277.07          | 9048.99 | 9192.53 | 9048.99 | 9484.81 | 9048.99 | 9048.99 | 9628.35 |
| 724.5               | 9345.99          | 9045.29 | 9205.07 | 9045.29 | 9471.75 | 9045.29 | 9045.29 | 9631.53 |
| 724.4               | 9405.21          | 9041.42 | 9218.59 | 9041.42 | 9456.63 | 9041.42 | 9041.42 | 9633.8  |

| Binding energy (eV) | Intensity (a.u.) |         |         |         |         |         |         |         |
|---------------------|------------------|---------|---------|---------|---------|---------|---------|---------|
|                     | LineA            | LineB   | LineC   | LineD   | LineE   | LineF   | LineG   | LineH   |
| 724.3               | 9465.52          | 9037.6  | 9233.3  | 9037.6  | 9439.87 | 9037.6  | 9037.6  | 9635.56 |
| 724.2               | 9719.32          | 9033.85 | 9249.13 | 9033.85 | 9421.69 | 9033.85 | 9033.85 | 9636.97 |
| 724.1               | 9753.89          | 9030.1  | 9265.96 | 9030.1  | 9402.22 | 9030.1  | 9030.1  | 9638.08 |
| 724                 | 9689.38          | 9026.34 | 9283.66 | 9026.34 | 9381.69 | 9026.34 | 9026.34 | 9639.02 |
| 723.9               | 9574.72          | 9022.49 | 9302.04 | 9022.49 | 9360.26 | 9022.49 | 9022.49 | 9639.81 |
| 723.8               | 9549.56          | 9018.57 | 9320.95 | 9018.57 | 9338.16 | 9018.57 | 9018.57 | 9640.54 |
| 723.7               | 9567.67          | 9014.47 | 9340.08 | 9014.47 | 9315.51 | 9014.48 | 9014.47 | 9641.12 |
| 723.6               | 9493.78          | 9010.24 | 9359.27 | 9010.24 | 9292.56 | 9010.25 | 9010.24 | 9641.59 |
| 723.5               | 9362.87          | 9005.98 | 9378.37 | 9005.98 | 9269.61 | 9005.99 | 9005.98 | 9642    |
| 723.4               | 9417.83          | 9001.74 | 9397.16 | 9001.74 | 9246.88 | 9001.74 | 9001.74 | 9642.31 |
| 723.3               | 9648.43          | 8997.56 | 9415.43 | 8997.56 | 9224.57 | 8997.57 | 8997.56 | 9642.45 |
| 723.2               | 9633.91          | 8993.43 | 9432.82 | 8993.43 | 9202.81 | 8993.45 | 8993.43 | 9642.21 |
| 723.1               | 9722.25          | 8989.29 | 9448.99 | 8989.29 | 9181.63 | 8989.31 | 8989.29 | 9641.34 |
| 723                 | 9683.62          | 8985.14 | 9463.62 | 8985.14 | 9161.15 | 8985.16 | 8985.14 | 9639.66 |
| 722.9               | 9523.49          | 8980.96 | 9476.4  | 8980.96 | 9141.42 | 8980.99 | 8980.96 | 9636.89 |
| 722.8               | 9466.24          | 8976.57 | 9486.87 | 8976.57 | 9122.3  | 8976.62 | 8976.57 | 9632.65 |
| 722.7               | 9524.82          | 8972.07 | 9494.87 | 8972.07 | 9103.95 | 8972.14 | 8972.07 | 9626.81 |
| 722.6               | 9534.59          | 8967.56 | 9500.27 | 8967.56 | 9086.47 | 8967.66 | 8967.56 | 9619.28 |
| 722.5               | 9497.44          | 8962.99 | 9502.85 | 8962.99 | 9069.83 | 8963.12 | 8962.99 | 9609.82 |
| 722.4               | 9650.44          | 8958.45 | 9502.56 | 8958.45 | 9054.11 | 8958.63 | 8958.45 | 9598.41 |
| 722.3               | 9543.2           | 8953.98 | 9499.37 | 8953.98 | 9039.34 | 8954.22 | 8953.98 | 9584.98 |
| 722.2               | 9619.65          | 8949.6  | 9493.27 | 8949.6  | 9025.51 | 8949.93 | 8949.6  | 9569.52 |
| 722.1               | 9690.3           | 8945.18 | 9484.16 | 8945.18 | 9012.47 | 8945.63 | 8945.18 | 9551.9  |
| 722                 | 9616.59          | 8940.79 | 9472.21 | 8940.79 | 9000.24 | 8941.39 | 8940.79 | 9532.25 |
| 721.9               | 9526.43          | 8936.57 | 9457.67 | 8936.57 | 8988.92 | 8937.36 | 8936.57 | 9510.82 |
| 721.8               | 9328.71          | 8932.42 | 9440.67 | 8932.42 | 8978.37 | 8933.47 | 8932.42 | 9487.67 |
| 721.7               | 9484.09          | 8928.47 | 9421.53 | 8928.47 | 8968.67 | 8929.84 | 8928.47 | 9463.11 |
| 721.6               | 9428.7           | 8924.7  | 9400.51 | 8924.7  | 8959.77 | 8926.49 | 8924.7  | 9437.37 |
| 721.5               | 9230.54          | 8921.22 | 9378    | 8921.22 | 8951.71 | 8923.55 | 8921.22 | 9410.83 |
| 721.4               | 9323.89          | 8918.07 | 9354.34 | 8918.07 | 8944.5  | 8921.08 | 8918.07 | 9383.79 |
| 721.3               | 9299.3           | 8915.12 | 9329.71 | 8915.12 | 8937.96 | 8918.97 | 8915.12 | 9356.41 |
| 721.2               | 9209.33          | 8912.29 | 9304.35 | 8912.29 | 8931.98 | 8917.21 | 8912.29 | 9328.95 |
| 721.1               | 9106.31          | 8909.43 | 9278.38 | 8909.43 | 8926.34 | 8915.66 | 8909.43 | 9301.52 |
| 721                 | 9129.29          | 8906.7  | 9252.26 | 8906.7  | 8921.18 | 8914.54 | 8906.7  | 9274.58 |
| 720.9               | 9269.49          | 8904.2  | 9226.36 | 8904.2  | 8916.56 | 8914.02 | 8904.2  | 9248.54 |
| 720.8               | 9279.09          | 8901.84 | 9200.81 | 8901.84 | 8912.36 | 8914.06 | 8901.84 | 9223.55 |
| 720.7               | 9361.97          | 8899.57 | 9175.8  | 8899.57 | 8908.5  | 8914.69 | 8899.57 | 9199.84 |
| 720.6               | 9250.49          | 8897.35 | 9151.45 | 8897.35 | 8904.91 | 8915.93 | 8897.35 | 9177.59 |
| 720.5               | 9014.03          | 8895.15 | 9127.9  | 8895.15 | 8901.52 | 8917.83 | 8895.15 | 9156.97 |
| 720.4               | 8990.47          | 8892.95 | 9105.27 | 8892.95 | 8898.31 | 8920.48 | 8892.95 | 9138.16 |
| 720.3               | 9141.16          | 8890.81 | 9083.7  | 8890.81 | 8895.31 | 8924.01 | 8890.81 | 9121.4  |
| 720.2               | 9199.62          | 8888.86 | 9063.39 | 8888.86 | 8892.62 | 8928.64 | 8888.86 | 9106.93 |
| 720.1               | 9157.72          | 8887.09 | 9044.39 | 8887.09 | 8890.22 | 8934.43 | 8887.09 | 9094.87 |
| 720                 | 9066.31          | 8885.46 | 9026.69 | 8885.46 | 8888.07 | 8941.43 | 8885.46 | 9085.27 |
| 719.9               | 9009.25          | 8883.86 | 9010.18 | 8883.86 | 8886.02 | 8949.57 | 8883.86 | 9078.06 |
| 719.8               | 8941.49          | 8882.14 | 8994.71 | 8882.14 | 8883.93 | 8958.76 | 8882.14 | 9073.12 |
| 719.7               | 8974.63          | 8880.32 | 8980.26 | 8880.32 | 8881.79 | 8969.01 | 8880.32 | 9070.43 |
| 719.6               | 9104.84          | 8878.4  | 8966.82 | 8878.41 | 8879.61 | 8980.32 | 8878.4  | 9069.96 |
| 719.5               | 9188.52          | 8876.33 | 8954.27 | 8876.33 | 8877.32 | 8992.57 | 8876.33 | 9071.51 |
| 719.4               | 9179.6           | 8874.15 | 8942.62 | 8874.16 | 8874.96 | 9005.71 | 8874.15 | 9075    |
| 719.3               | 9138.99          | 8872.03 | 8931.96 | 8872.04 | 8872.69 | 9019.73 | 8872.03 | 9080.34 |
| 719.2               | 9264.73          | 8869.96 | 8922.24 | 8869.97 | 8870.49 | 9034.42 | 8869.96 | 9087.27 |
| 719.1               | 9428.58          | 8867.82 | 8913.28 | 8867.84 | 8868.25 | 9049.42 | 8867.82 | 9095.33 |
| 719                 | 9291.01          | 8865.5  | 8904.9  | 8865.53 | 8865.85 | 9064.27 | 8865.5  | 9104.04 |
| 718.9               | 8963.94          | 8863.02 | 8897.04 | 8863.06 | 8863.3  | 9078.63 | 8863.02 | 9112.97 |
| 718.8               | 8896.42          | 8860.45 | 8889.73 | 8860.5  | 8860.67 | 9092.18 | 8860.45 | 9121.74 |
| 718.7               | 9020.24          | 8857.78 | 8882.9  | 8857.84 | 8857.96 | 9104.49 | 8857.78 | 9129.86 |

| Binding energy (eV) | Intensity (a.u.) |         |         |         |         |         |         |         |
|---------------------|------------------|---------|---------|---------|---------|---------|---------|---------|
|                     | LineA            | LineB   | LineC   | LineD   | LineE   | LineF   | LineG   | LineH   |
| 718.6               | 9234.75          | 8855.06 | 8876.54 | 8855.13 | 8855.2  | 9115.18 | 8855.06 | 9136.89 |
| 718.5               | 9344.51          | 8852.42 | 8870.73 | 8852.52 | 8852.54 | 9123.98 | 8852.42 | 9142.51 |
| 718.4               | 9307.19          | 8849.88 | 8865.44 | 8850.01 | 8849.97 | 9130.53 | 8849.88 | 9146.31 |
| 718.3               | 9307.48          | 8847.39 | 8860.57 | 8847.55 | 8847.46 | 9134.48 | 8847.39 | 9147.89 |
| 718.2               | 9183.45          | 8844.82 | 8855.95 | 8845.02 | 8844.88 | 9135.48 | 8844.82 | 9146.87 |
| 718.1               | 9098.41          | 8842.17 | 8851.53 | 8842.43 | 8842.22 | 9133.41 | 8842.17 | 9143.07 |
| 718                 | 9243.87          | 8839.44 | 8847.29 | 8839.75 | 8839.47 | 9128.23 | 8839.44 | 9136.43 |
| 717.9               | 9185.93          | 8836.69 | 8843.26 | 8837.09 | 8836.72 | 9120.11 | 8836.69 | 9127.1  |
| 717.8               | 9059.47          | 8834.05 | 8839.52 | 8834.55 | 8834.07 | 9109.35 | 8834.05 | 9115.34 |
| 717.7               | 8998.05          | 8831.49 | 8836.04 | 8832.11 | 8831.51 | 9096.2  | 8831.49 | 9101.39 |
| 717.6               | 9125.4           | 8829.15 | 8832.92 | 8829.91 | 8829.16 | 9081.16 | 8829.15 | 9085.7  |
| 717.5               | 9220.79          | 8827.01 | 8830.11 | 8827.95 | 8827.01 | 9064.58 | 8827    | 9068.65 |
| 717.4               | 9143.32          | 8824.89 | 8827.45 | 8826.05 | 8824.89 | 9046.72 | 8824.89 | 9050.45 |
| 717.3               | 9152.33          | 8822.84 | 8824.94 | 8824.27 | 8822.84 | 9028.05 | 8822.84 | 9031.59 |
| 717.2               | 8923.89          | 8820.83 | 8822.55 | 8822.58 | 8820.83 | 9008.95 | 8820.83 | 9012.43 |
| 717.1               | 8843.22          | 8818.85 | 8820.24 | 8820.99 | 8818.85 | 8989.78 | 8818.84 | 8993.34 |
| 717                 | 9032.47          | 8816.88 | 8818.01 | 8819.49 | 8816.88 | 8970.87 | 8816.87 | 8974.64 |
| 716.9               | 9106.35          | 8815    | 8815.92 | 8818.17 | 8815    | 8952.59 | 8814.99 | 8956.7  |
| 716.8               | 9096.88          | 8813.37 | 8814.1  | 8817.21 | 8813.36 | 8935.3  | 8813.36 | 8939.91 |
| 716.7               | 8997.59          | 8811.9  | 8812.49 | 8816.54 | 8811.89 | 8919.12 | 8811.89 | 8924.38 |
| 716.6               | 8949.43          | 8810.48 | 8810.94 | 8816.06 | 8810.46 | 8904.04 | 8810.46 | 8910.14 |
| 716.5               | 8957.43          | 8808.86 | 8809.22 | 8815.56 | 8808.83 | 8889.89 | 8808.83 | 8897.03 |
| 716.4               | 8809.8           | 8807.05 | 8807.33 | 8815.07 | 8807.02 | 8876.73 | 8807.02 | 8885.12 |
| 716.3               | 8856.27          | 8805.36 | 8805.56 | 8814.93 | 8805.32 | 8864.84 | 8805.31 | 8874.74 |
| 716.2               | 9061.96          | 8803.83 | 8803.97 | 8815.21 | 8803.77 | 8854.26 | 8803.77 | 8865.94 |
| 716.1               | 9229.14          | 8802.42 | 8802.51 | 8815.93 | 8802.35 | 8844.88 | 8802.35 | 8858.68 |
| 716                 | 9116.86          | 8801.09 | 8801.12 | 8817.07 | 8801    | 8836.59 | 8801    | 8852.86 |
| 715.9               | 8834.84          | 8799.71 | 8799.68 | 8818.54 | 8799.59 | 8829.17 | 8799.59 | 8848.33 |
| 715.8               | 8828.29          | 8798.25 | 8798.18 | 8820.4  | 8798.1  | 8822.54 | 8798.1  | 8845.05 |
| 715.7               | 8879.12          | 8796.76 | 8796.63 | 8822.71 | 8796.57 | 8816.62 | 8796.57 | 8843.02 |
| 715.6               | 8866.55          | 8795.25 | 8795.05 | 8825.58 | 8795.01 | 8811.36 | 8795.01 | 8842.22 |
| 715.5               | 9037.51          | 8793.89 | 8793.61 | 8829.22 | 8793.58 | 8806.84 | 8793.58 | 8842.81 |
| 715.4               | 9049.83          | 8792.74 | 8792.37 | 8833.76 | 8792.35 | 8803.02 | 8792.35 | 8844.86 |
| 715.3               | 8868.29          | 8791.7  | 8791.23 | 8839.2  | 8791.21 | 8799.76 | 8791.21 | 8848.26 |
| 715.2               | 8879.75          | 8790.69 | 8790.09 | 8845.51 | 8790.08 | 8796.88 | 8790.08 | 8852.94 |
| 715.1               | 8830.25          | 8789.65 | 8788.89 | 8852.71 | 8788.88 | 8794.26 | 8788.88 | 8858.88 |
| 715                 | 8900.79          | 8788.52 | 8787.56 | 8860.83 | 8787.55 | 8791.78 | 8787.55 | 8866.04 |
| 714.9               | 8941.24          | 8787.28 | 8786.08 | 8869.93 | 8786.07 | 8789.38 | 8786.07 | 8874.45 |
| 714.8               | 8815.86          | 8786.03 | 8784.54 | 8880.2  | 8784.54 | 8787.11 | 8784.54 | 8884.28 |
| 714.7               | 8910.62          | 8784.77 | 8782.92 | 8891.7  | 8782.91 | 8784.9  | 8782.91 | 8895.54 |
| 714.6               | 9077.42          | 8783.45 | 8781.17 | 8904.48 | 8781.16 | 8782.69 | 8781.16 | 8908.29 |
| 714.5               | 9087.49          | 8782.19 | 8779.39 | 8918.7  | 8779.38 | 8780.55 | 8779.38 | 8922.68 |
| 714.4               | 9103.2           | 8780.94 | 8777.49 | 8934.38 | 8777.49 | 8778.37 | 8777.49 | 8938.7  |
| 714.3               | 9174.29          | 8779.76 | 8775.55 | 8951.62 | 8775.55 | 8776.21 | 8775.55 | 8956.49 |
| 714.2               | 9046.81          | 8778.72 | 8773.59 | 8970.53 | 8773.59 | 8774.09 | 8773.59 | 8976.15 |
| 714.1               | 8909.58          | 8777.62 | 8771.4  | 8990.91 | 8771.39 | 8771.77 | 8771.39 | 8997.5  |
| 714                 | 8985.67          | 8776.37 | 8768.83 | 9012.65 | 8768.83 | 8769.11 | 8768.83 | 9020.46 |
| 713.9               | 8961.73          | 8775.13 | 8766.03 | 9035.89 | 8766.03 | 8766.24 | 8766.03 | 9045.19 |
| 713.8               | 8937.46          | 8774.07 | 8763.14 | 9060.73 | 8763.14 | 8763.29 | 8763.14 | 9071.82 |
| 713.7               | 9178.07          | 8773.27 | 8760.16 | 9087.13 | 8760.16 | 8760.27 | 8760.16 | 9100.35 |
| 713.6               | 9466.07          | 8772.72 | 8757.05 | 9114.94 | 8757.05 | 8757.13 | 8757.05 | 9130.69 |
| 713.5               | 9427.54          | 8772.31 | 8753.64 | 9143.87 | 8753.64 | 8753.69 | 8753.64 | 9162.6  |
| 713.4               | 9211.82          | 8772.06 | 8749.88 | 9173.71 | 8749.88 | 8749.92 | 8749.88 | 9195.93 |
| 713.3               | 9202.99          | 8772.16 | 8745.91 | 9204.39 | 8745.91 | 8745.94 | 8745.91 | 9230.68 |
| 713.2               | 9347.76          | 8772.6  | 8741.62 | 9235.56 | 8741.62 | 8741.64 | 8741.62 | 9266.56 |
| 713.1               | 9501.85          | 8773.46 | 8737.01 | 9266.94 | 8737.01 | 8737.03 | 8737.01 | 9303.4  |
| 713                 | 9417.15          | 8775.04 | 8732.3  | 9298.42 | 8732.3  | 8732.31 | 8732.3  | 9341.16 |

| Binding energy (eV) | Intensity (a.u.) |         |         |         |         |         |         |         |
|---------------------|------------------|---------|---------|---------|---------|---------|---------|---------|
|                     | LineA            | LineB   | LineC   | LineD   | LineE   | LineF   | LineG   | LineH   |
| 712.9               | 9295.53          | 8777.65 | 8727.71 | 9329.86 | 8727.71 | 8727.71 | 8727.71 | 9379.8  |
| 712.8               | 9431.6           | 8781.28 | 8723.1  | 9360.73 | 8723.1  | 8723.11 | 8723.1  | 9418.91 |
| 712.7               | 9385.35          | 8785.69 | 8718.15 | 9390.3  | 8718.15 | 8718.15 | 8718.15 | 9457.85 |
| 712.6               | 9301.92          | 8790.93 | 8712.77 | 9418.05 | 8712.77 | 8712.77 | 8712.77 | 9496.21 |
| 712.5               | 9239.59          | 8797.33 | 8707.18 | 9443.75 | 8707.18 | 8707.18 | 8707.18 | 9533.9  |
| 712.4               | 9392.56          | 8805.23 | 8701.62 | 9467.19 | 8701.62 | 8701.62 | 8701.62 | 9570.81 |
| 712.3               | 9722.67          | 8814.66 | 8695.96 | 9487.83 | 8695.96 | 8695.96 | 8695.96 | 9606.53 |
| 712.2               | 9822.49          | 8825.58 | 8690.07 | 9505.13 | 8690.07 | 8690.07 | 8690.07 | 9640.64 |
| 712.1               | 9639.35          | 8838.11 | 8683.95 | 9518.7  | 8683.95 | 8683.95 | 8683.95 | 9672.86 |
| 712                 | 9405.92          | 8852.32 | 8677.54 | 9528.18 | 8677.54 | 8677.54 | 8677.54 | 9702.95 |
| 711.9               | 9509.88          | 8868.29 | 8670.85 | 9533.29 | 8670.85 | 8670.85 | 8670.85 | 9730.72 |
| 711.8               | 9603.27          | 8885.99 | 8663.77 | 9533.73 | 8663.77 | 8663.77 | 8663.77 | 9755.94 |
| 711.7               | 9752.24          | 8905.62 | 8656.42 | 9529.48 | 8656.42 | 8656.42 | 8656.42 | 9778.68 |
| 711.6               | 9767.06          | 8927.46 | 8649.04 | 9520.73 | 8649.04 | 8649.04 | 8649.04 | 9799.15 |
| 711.5               | 9699.25          | 8951.58 | 8641.7  | 9507.58 | 8641.7  | 8641.7  | 8641.7  | 9817.46 |
| 711.4               | 9802.09          | 8977.89 | 8634.31 | 9490.04 | 8634.31 | 8634.31 | 8634.31 | 9833.61 |
| 711.3               | 9755.1           | 9006.14 | 8626.71 | 9468.11 | 8626.71 | 8626.71 | 8626.71 | 9847.54 |
| 711.2               | 9692.71          | 9036.3  | 8618.95 | 9442.11 | 8618.95 | 8618.95 | 8618.95 | 9859.45 |
| 711.1               | 9688.1           | 9068.16 | 8610.98 | 9412.27 | 8610.98 | 8610.98 | 8610.98 | 9869.44 |
| 711                 | 9642.27          | 9101.55 | 8602.84 | 9379    | 8602.84 | 8602.84 | 8602.84 | 9877.71 |
| 710.9               | 9674.41          | 9136.28 | 8594.58 | 9342.73 | 8594.58 | 8594.58 | 8594.58 | 9884.43 |
| 710.8               | 9693.56          | 9172    | 8586.17 | 9303.87 | 8586.17 | 8586.17 | 8586.17 | 9889.7  |
| 710.7               | 9861.33          | 9208.38 | 8577.65 | 9262.88 | 8577.65 | 8577.65 | 8577.65 | 9893.61 |
| 710.6               | 9946.36          | 9244.84 | 8568.85 | 9220.06 | 8568.85 | 8568.85 | 8568.85 | 9896.04 |
| 710.5               | 9889.2           | 9280.97 | 8559.85 | 9175.9  | 8559.85 | 8559.85 | 8559.85 | 9897.01 |
| 710.4               | 9854.08          | 9316.33 | 8550.72 | 9130.9  | 8550.72 | 8550.72 | 8550.72 | 9896.5  |
| 710.3               | 9899.81          | 9350.37 | 8541.48 | 9085.49 | 8541.48 | 8541.48 | 8541.48 | 9894.38 |
| 710.2               | 10105.7          | 9382.56 | 8532.15 | 9040.05 | 8532.15 | 8532.15 | 8532.15 | 9890.46 |
| 710.1               | 9936.97          | 9412.2  | 8522.64 | 8994.85 | 8522.64 | 8522.64 | 8522.64 | 9884.4  |
| 710                 | 9817             | 9438.79 | 8513.06 | 8950.26 | 8513.06 | 8513.06 | 8513.06 | 9875.99 |
| 709.9               | 9732.74          | 9461.79 | 8503.43 | 8906.59 | 8503.43 | 8503.43 | 8503.43 | 9864.96 |
| 709.8               | 9723.5           | 9480.58 | 8493.66 | 8863.98 | 8493.66 | 8493.66 | 8493.66 | 9850.9  |
| 709.7               | 9886.94          | 9494.65 | 8483.76 | 8822.58 | 8483.76 | 8483.76 | 8483.76 | 9833.47 |
| 709.6               | 9899.62          | 9503.8  | 8473.94 | 8782.77 | 8473.94 | 8473.94 | 8473.94 | 9812.63 |
| 709.5               | 9928.47          | 9507.82 | 8464.34 | 8744.79 | 8464.34 | 8464.34 | 8464.34 | 9788.27 |
| 709.4               | 10007.6          | 9506.26 | 8454.77 | 8708.52 | 8454.77 | 8454.77 | 8454.77 | 9760.01 |
| 709.3               | 9988.99          | 9498.91 | 8445.15 | 8673.92 | 8445.15 | 8445.15 | 8445.15 | 9727.67 |
| 709.2               | 9679.01          | 9485.73 | 8435.51 | 8641.02 | 8435.51 | 8435.51 | 8435.51 | 9691.24 |
| 709.1               | 9648.94          | 9466.83 | 8425.87 | 8609.85 | 8425.87 | 8425.87 | 8425.87 | 9650.81 |
| 709                 | 9809.21          | 9442.49 | 8416.35 | 8580.5  | 8416.35 | 8416.35 | 8416.35 | 9606.64 |
| 708.9               | 9792.3           | 9413.05 | 8407.01 | 8552.97 | 8407.01 | 8407.01 | 8407.01 | 9559.01 |
| 708.8               | 9699.92          | 9378.91 | 8397.88 | 8527.25 | 8397.88 | 8397.88 | 8397.88 | 9508.27 |
| 708.7               | 9619.43          | 9340.59 | 8389.05 | 8503.33 | 8389.05 | 8389.05 | 8389.05 | 9454.86 |
| 708.6               | 9600.95          | 9298.7  | 8380.62 | 8481.24 | 8380.62 | 8380.62 | 8380.62 | 9399.31 |
| 708.5               | 9530.4           | 9253.73 | 8372.53 | 8460.84 | 8372.53 | 8372.53 | 8372.53 | 9342.03 |
| 708.4               | 9490             | 9206.3  | 8364.82 | 8442.07 | 8364.82 | 8364.82 | 8364.82 | 9283.55 |
| 708.3               | 9455.44          | 9157.11 | 8357.59 | 8424.97 | 8357.59 | 8357.59 | 8357.59 | 9224.49 |
| 708.2               | 9271.89          | 9106.81 | 8350.89 | 8409.47 | 8350.89 | 8350.89 | 8350.89 | 9165.39 |
| 708.1               | 9049.98          | 9056.02 | 8344.77 | 8395.55 | 8344.77 | 8344.77 | 8344.77 | 9106.79 |
| 708                 | 8984.08          | 9005.25 | 8339.21 | 8383.08 | 8339.21 | 8339.21 | 8339.21 | 9049.12 |
| 707.9               | 8951.42          | 8955.05 | 8334.22 | 8372.01 | 8334.22 | 8334.22 | 8334.22 | 8992.84 |
| 707.8               | 8879.37          | 8905.9  | 8329.84 | 8362.3  | 8329.84 | 8329.84 | 8329.84 | 8938.36 |
| 707.7               | 8711.79          | 8858.02 | 8325.87 | 8353.66 | 8325.87 | 8325.87 | 8325.87 | 8885.81 |
| 707.6               | 8680.99          | 8811.73 | 8322.28 | 8346    | 8322.28 | 8322.28 | 8322.28 | 8835.46 |
| 707.5               | 8625.65          | 8767.39 | 8319.11 | 8339.31 | 8319.11 | 8319.11 | 8319.11 | 8787.58 |
| 707.4               | 8507.6           | 8725.09 | 8316.24 | 8333.37 | 8316.24 | 8316.24 | 8316.24 | 8742.23 |
| 707.3               | 8802.51          | 8685    | 8313.62 | 8328.12 | 8313.62 | 8313.62 | 8313.62 | 8699.5  |

| Binding energy (eV) | Intensity (a.u.) |         |         |         |         |         |         |         |
|---------------------|------------------|---------|---------|---------|---------|---------|---------|---------|
|                     | LineA            | LineB   | LineC   | LineD   | LineE   | LineF   | LineG   | LineH   |
| 707.2               | 8805.69          | 8647.2  | 8311.21 | 8323.44 | 8311.21 | 8311.21 | 8311.21 | 8659.43 |
| 707.1               | 8562.51          | 8611.74 | 8308.95 | 8319.24 | 8308.95 | 8308.95 | 8308.95 | 8622.03 |
| 707                 | 8552.99          | 8578.66 | 8306.85 | 8315.48 | 8306.85 | 8306.85 | 8306.85 | 8587.29 |
| 706.9               | 8542.85          | 8547.98 | 8304.89 | 8312.11 | 8304.89 | 8304.89 | 8304.89 | 8555.19 |
| 706.8               | 8598.28          | 8519.64 | 8303.05 | 8309.07 | 8303.05 | 8303.05 | 8303.05 | 8525.66 |
| 706.7               | 8619.25          | 8493.7  | 8301.42 | 8306.42 | 8301.42 | 8301.42 | 8301.42 | 8498.7  |
| 706.6               | 8440.03          | 8470.32 | 8300.24 | 8304.39 | 8300.24 | 8300.24 | 8300.24 | 8474.46 |
| 706.5               | 8428.9           | 8449.36 | 8299.45 | 8302.87 | 8299.45 | 8299.45 | 8299.45 | 8452.78 |
| 706.4               | 8420.66          | 8430.42 | 8298.75 | 8301.57 | 8298.75 | 8298.75 | 8298.75 | 8433.24 |
| 706.3               | 8153.48          | 8413.35 | 8298.1  | 8300.42 | 8298.1  | 8298.1  | 8298.1  | 8415.67 |
| 706.2               | 8069.49          | 8398.08 | 8297.55 | 8299.45 | 8297.55 | 8297.55 | 8297.55 | 8399.98 |
| 706.1               | 8173.11          | 8384.5  | 8297.11 | 8298.66 | 8297.11 | 8297.11 | 8297.11 | 8386.05 |
| 706                 | 8413.23          | 8372.59 | 8296.88 | 8298.14 | 8296.88 | 8296.88 | 8296.88 | 8373.86 |
| 705.9               | 8450.45          | 8362.21 | 8296.82 | 8297.85 | 8296.82 | 8296.82 | 8296.82 | 8363.23 |
| 705.8               | 8397.2           | 8355.93 | 8299.66 | 8300.49 | 8299.66 | 8299.66 | 8299.66 | 8356.76 |
| 705.7               | 8415.54          | 8350.77 | 8302.49 | 8303.16 | 8302.49 | 8302.49 | 8302.49 | 8351.44 |
| 705.6               | 8269.43          | 8346.6  | 8305.33 | 8305.87 | 8305.33 | 8305.33 | 8305.33 | 8347.14 |
| 705.5               | 8159.61          | 8343.34 | 8308.16 | 8308.59 | 8308.16 | 8308.16 | 8308.16 | 8343.77 |
| 705.4               | 8342.87          | 8340.88 | 8310.99 | 8311.34 | 8310.99 | 8310.99 | 8310.99 | 8341.23 |
| 705.3               | 8558.25          | 8339.14 | 8313.83 | 8314.11 | 8313.83 | 8313.83 | 8313.83 | 8339.41 |
| 705.2               | 8533.41          | 8338.02 | 8316.66 | 8316.88 | 8316.66 | 8316.66 | 8316.66 | 8338.24 |
| 705.1               | 8344.03          | 8337.47 | 8319.5  | 8319.67 | 8319.5  | 8319.5  | 8319.5  | 8337.65 |
| 705                 | 8392.81          | 8337.41 | 8322.33 | 8322.47 | 8322.33 | 8322.33 | 8322.33 | 8337.54 |
| 704.9               | 8483.42          | 8337.77 | 8325.16 | 8325.27 | 8325.16 | 8325.16 | 8325.16 | 8337.88 |
| 704.8               | 8500.13          | 8338.5  | 8328    | 8328.08 | 8328    | 8328    | 8328    | 8338.59 |
| 704.7               | 8482.64          | 8339.56 | 8330.83 | 8330.9  | 8330.83 | 8330.83 | 8330.83 | 8339.63 |
| 704.6               | 8438.01          | 8340.89 | 8333.67 | 8333.72 | 8333.67 | 8333.67 | 8333.67 | 8340.95 |
| 704.5               | 8505.13          | 8342.47 | 8336.5  | 8336.54 | 8336.5  | 8336.5  | 8336.5  | 8342.51 |
| 704.4               | 8391.92          | 8344.25 | 8339.34 | 8339.37 | 8339.34 | 8339.34 | 8339.34 | 8344.28 |
| 704.3               | 8336.73          | 8346.2  | 8342.17 | 8342.19 | 8342.17 | 8342.17 | 8342.17 | 8346.22 |
| 704.2               | 8363.81          | 8348.3  | 8345    | 8345.02 | 8345    | 8345    | 8345    | 8348.32 |

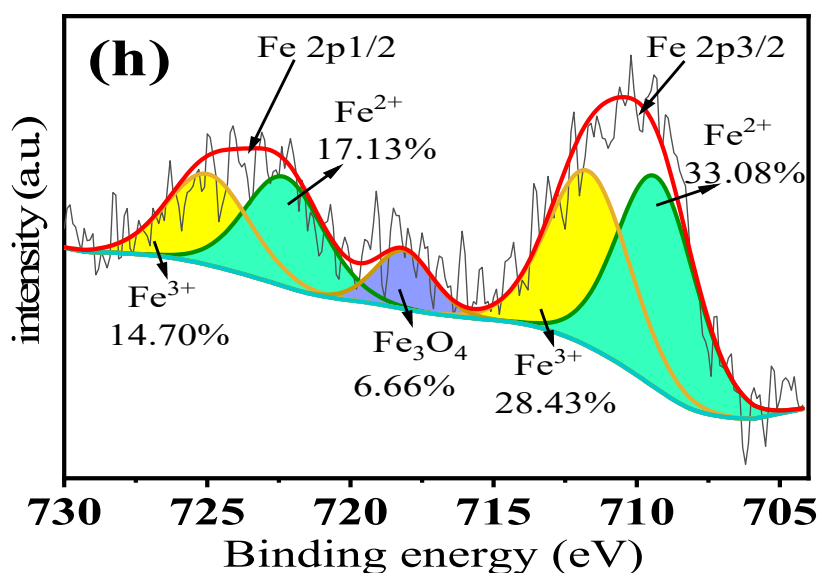



| Binding energy (eV) | Intensity (a.u.) |         |         |         |         |         |         |
|---------------------|------------------|---------|---------|---------|---------|---------|---------|
|                     | LineA            | LineB   | LineC   | LineD   | LineE   | LineF   | LineG   |
| 589.9               | 9031.14          | 9147.38 | 9173.85 | 9147.38 | 9147.38 | 9147.38 | 9173.92 |
| 589.8               | 9075.93          | 9146.37 | 9179.19 | 9146.37 | 9146.37 | 9146.37 | 9179.28 |
| 589.7               | 9143.61          | 9145.32 | 9185.83 | 9145.32 | 9145.32 | 9145.32 | 9185.94 |
| 589.6               | 9466.16          | 9144.25 | 9194.02 | 9144.25 | 9144.25 | 9144.25 | 9194.16 |
| 589.5               | 9580.26          | 9143.19 | 9204.04 | 9143.19 | 9143.19 | 9143.19 | 9204.21 |
| 589.4               | 9436.26          | 9142.04 | 9216.1  | 9142.04 | 9142.04 | 9142.04 | 9216.32 |
| 589.3               | 9329.38          | 9140.76 | 9230.46 | 9140.76 | 9140.76 | 9140.76 | 9230.73 |
| 589.2               | 9304.21          | 9139.23 | 9247.35 | 9139.23 | 9139.23 | 9139.23 | 9247.69 |
| 589.1               | 9267.87          | 9137.42 | 9267.12 | 9137.42 | 9137.42 | 9137.42 | 9267.54 |
| 589                 | 9437.42          | 9135.32 | 9290.15 | 9135.32 | 9135.32 | 9135.32 | 9290.67 |
| 588.9               | 9604.06          | 9133.12 | 9317.05 | 9133.12 | 9133.13 | 9133.12 | 9317.69 |
| 588.8               | 9575.21          | 9130.92 | 9348.32 | 9130.92 | 9130.94 | 9130.92 | 9349.12 |
| 588.7               | 9669.07          | 9128.54 | 9384.22 | 9128.54 | 9128.57 | 9128.54 | 9385.21 |
| 588.6               | 9791.79          | 9125.89 | 9425.07 | 9125.89 | 9125.96 | 9125.89 | 9426.3  |
| 588.5               | 9633.76          | 9123    | 9471.26 | 9123    | 9123.11 | 9123    | 9472.78 |
| 588.4               | 9562.62          | 9119.77 | 9523.04 | 9119.77 | 9119.95 | 9119.77 | 9524.95 |
| 588.3               | 9826.59          | 9116.28 | 9580.76 | 9116.28 | 9116.58 | 9116.28 | 9583.16 |
| 588.2               | 9875.24          | 9112.54 | 9644.62 | 9112.54 | 9113.03 | 9112.54 | 9647.64 |
| 588.1               | 9842.52          | 9108.51 | 9714.64 | 9108.51 | 9109.3  | 9108.51 | 9718.49 |
| 588                 | 9977.06          | 9104.3  | 9790.87 | 9104.3  | 9105.57 | 9104.3  | 9795.81 |
| 587.9               | 9995.73          | 9099.96 | 9873.14 | 9099.96 | 9101.95 | 9099.96 | 9879.53 |
| 587.8               | 10115.4          | 9095.4  | 9960.94 | 9095.4  | 9098.48 | 9095.4  | 9969.28 |
| 587.7               | 10194.9          | 9090.56 | 10053.6 | 9090.56 | 9095.27 | 9090.56 | 10064.6 |
| 587.6               | 10019            | 9085.51 | 10150.3 | 9085.51 | 9092.63 | 9085.51 | 10164.9 |
| 587.5               | 10035            | 9080.21 | 10250   | 9080.21 | 9090.81 | 9080.21 | 10269.4 |
| 587.4               | 10094.8          | 9074.53 | 10351.2 | 9074.53 | 9090.12 | 9074.53 | 10377.2 |
| 587.3               | 10130.8          | 9068.52 | 10452.4 | 9068.52 | 9091.13 | 9068.52 | 10487.3 |
| 587.2               | 10237.3          | 9062.1  | 10551.8 | 9062.1  | 9094.45 | 9062.1  | 10598.6 |
| 587.1               | 10395.7          | 9055.2  | 10647.5 | 9055.2  | 9100.87 | 9055.2  | 10710   |
| 587                 | 10613.4          | 9047.92 | 10737.4 | 9047.92 | 9111.51 | 9047.92 | 10820.6 |
| 586.9               | 10681.9          | 9040.14 | 10819.4 | 9040.14 | 9127.48 | 9040.14 | 10929.6 |
| 586.8               | 10863.8          | 9031.77 | 10891.4 | 9031.77 | 9150.07 | 9031.77 | 11036.2 |
| 586.7               | 11100.1          | 9022.76 | 10951.3 | 9022.76 | 9180.74 | 9022.76 | 11139.9 |
| 586.6               | 11003.6          | 9013.06 | 10997.5 | 9013.06 | 9220.99 | 9013.06 | 11240.7 |
| 586.5               | 11060.3          | 9002.79 | 11028.4 | 9002.79 | 9272.46 | 9002.79 | 11338.7 |
| 586.4               | 11280.7          | 8991.94 | 11043.1 | 8991.94 | 9336.4  | 8991.94 | 11434.1 |
| 586.3               | 11463.6          | 8980.53 | 11040.9 | 8980.53 | 9413.71 | 8980.53 | 11527.1 |
| 586.2               | 11591.4          | 8968.67 | 11021.5 | 8968.67 | 9504.64 | 8968.67 | 11617.9 |
| 586.1               | 11427.5          | 8956.36 | 10985.3 | 8956.36 | 9608.44 | 8956.36 | 11705.9 |
| 586                 | 11599.9          | 8943.69 | 10932.9 | 8943.69 | 9723.22 | 8943.69 | 11789.9 |
| 585.9               | 11745.4          | 8930.71 | 10865.4 | 8930.71 | 9845.65 | 8930.71 | 11867.8 |
| 585.8               | 11614.5          | 8917.39 | 10784.4 | 8917.39 | 9970.86 | 8917.39 | 11936.1 |
| 585.7               | 11739.3          | 8903.8  | 10691.5 | 8903.8  | 10092.7 | 8903.8  | 11990.4 |
| 585.6               | 11786.7          | 8890.1  | 10588.8 | 8890.1  | 10204.1 | 8890.1  | 12025.5 |
| 585.5               | 11581.5          | 8876.43 | 10478.6 | 8876.43 | 10297.5 | 8876.43 | 12036.1 |
| 585.4               | 11672.5          | 8862.89 | 10363   | 8862.89 | 10365.7 | 8862.89 | 12017   |
| 585.3               | 11782.5          | 8849.52 | 10244   | 8849.52 | 10402.9 | 8849.52 | 11964.3 |
| 585.2               | 11572.6          | 8836.41 | 10123.7 | 8836.41 | 10405.1 | 8836.41 | 11876.1 |
| 585.1               | 11351.4          | 8823.61 | 10004   | 8823.61 | 10371.3 | 8823.61 | 11752.9 |
| 585                 | 11029.9          | 8811.29 | 9886.4  | 8811.29 | 10303.2 | 8811.29 | 11598.1 |
| 584.9               | 11053.8          | 8799.55 | 9772.51 | 8799.55 | 10205.3 | 8799.55 | 11417.3 |
| 584.8               | 11033.5          | 8788.37 | 9663.37 | 8788.37 | 10083.7 | 8788.37 | 11217.6 |
| 584.7               | 10752.4          | 8777.81 | 9559.91 | 8777.81 | 9945.99 | 8777.81 | 11007.3 |
| 584.6               | 10547.9          | 8767.98 | 9462.87 | 8767.98 | 9799.79 | 8767.98 | 10794.7 |

| Binding energy (eV) | Intensity (a.u.) |         |         |         |         |         |         |
|---------------------|------------------|---------|---------|---------|---------|---------|---------|
|                     | LineA            | LineB   | LineC   | LineD   | LineE   | LineF   | LineG   |
| 584.5               | 10327.9          | 8758.82 | 9372.65 | 8758.82 | 9652.22 | 8758.82 | 10587   |
| 584.4               | 10206.8          | 8750.28 | 9289.42 | 8750.28 | 9509.23 | 8750.28 | 10390.2 |
| 584.3               | 10145.9          | 8742.29 | 9213.2  | 8742.29 | 9375.38 | 8742.29 | 10208.8 |
| 584.2               | 10027.5          | 8734.88 | 9143.95 | 8734.88 | 9253.85 | 8734.88 | 10045.7 |
| 584.1               | 9942.54          | 8728.01 | 9081.46 | 8728.01 | 9146.36 | 8728.01 | 9902.02 |
| 584                 | 9851.67          | 8721.57 | 9025.36 | 8721.57 | 9053.42 | 8721.57 | 9777.92 |
| 583.9               | 9690.49          | 8715.55 | 8975.31 | 8715.55 | 8974.72 | 8715.55 | 9672.44 |
| 583.8               | 9666.42          | 8709.94 | 8930.92 | 8709.94 | 8909.31 | 8709.94 | 9584.03 |
| 583.7               | 9740.74          | 8704.74 | 8891.79 | 8704.74 | 8855.87 | 8704.74 | 9510.7  |
| 583.6               | 9688.5           | 8699.92 | 8857.45 | 8699.91 | 8812.83 | 8699.91 | 9450.26 |
| 583.5               | 9535.98          | 8695.4  | 8827.43 | 8695.4  | 8778.59 | 8695.4  | 9400.47 |
| 583.4               | 9324.79          | 8691.21 | 8801.33 | 8691.21 | 8751.64 | 8691.21 | 9359.26 |
| 583.3               | 9214.22          | 8687.31 | 8778.7  | 8687.31 | 8730.61 | 8687.31 | 9324.73 |
| 583.2               | 9253.9           | 8683.66 | 8759.15 | 8683.65 | 8714.26 | 8683.65 | 9295.19 |
| 583.1               | 9259.98          | 8680.36 | 8742.41 | 8680.34 | 8701.69 | 8680.34 | 9269.34 |
| 583                 | 9163.35          | 8677.42 | 8728.19 | 8677.4  | 8692.09 | 8677.4  | 9246.07 |
| 582.9               | 9148.79          | 8674.64 | 8715.98 | 8674.62 | 8684.59 | 8674.62 | 9224.27 |
| 582.8               | 9089.29          | 8671.93 | 8705.42 | 8671.89 | 8678.57 | 8671.89 | 9203.17 |
| 582.7               | 8828.13          | 8669.33 | 8696.33 | 8669.28 | 8673.7  | 8669.28 | 9182.36 |
| 582.6               | 8876.18          | 8666.91 | 8688.56 | 8666.84 | 8669.72 | 8666.84 | 9161.58 |
| 582.5               | 9292.54          | 8664.63 | 8681.89 | 8664.53 | 8666.38 | 8664.53 | 9140.64 |
| 582.4               | 9371.44          | 8662.4  | 8676.07 | 8662.26 | 8663.44 | 8662.26 | 9119.42 |
| 582.3               | 9036.04          | 8660.27 | 8671.02 | 8660.08 | 8660.82 | 8660.08 | 9098.03 |
| 582.2               | 8781.4           | 8658.29 | 8666.65 | 8658.03 | 8658.49 | 8658.03 | 9076.65 |
| 582.1               | 8946.27          | 8656.38 | 8662.79 | 8656.03 | 8656.31 | 8656.03 | 9055.43 |
| 582                 | 9125.23          | 8654.43 | 8659.24 | 8653.96 | 8654.13 | 8653.96 | 9034.52 |
| 581.9               | 8926.78          | 8652.51 | 8655.99 | 8651.88 | 8651.98 | 8651.88 | 9014.29 |
| 581.8               | 8836.19          | 8650.83 | 8653.16 | 8649.98 | 8650.04 | 8649.98 | 8995.29 |
| 581.7               | 8949.55          | 8649.36 | 8650.67 | 8648.23 | 8648.26 | 8648.23 | 8977.86 |
| 581.6               | 8952.22          | 8647.96 | 8648.33 | 8646.45 | 8646.47 | 8646.45 | 8962.22 |
| 581.5               | 8871.8           | 8646.54 | 8645.97 | 8644.54 | 8644.55 | 8644.54 | 8948.67 |
| 581.4               | 8861.67          | 8645.25 | 8643.71 | 8642.62 | 8642.63 | 8642.62 | 8937.74 |
| 581.3               | 9008.72          | 8644.3  | 8641.67 | 8640.84 | 8640.85 | 8640.84 | 8929.95 |
| 581.2               | 9064.51          | 8643.62 | 8639.73 | 8639.11 | 8639.11 | 8639.11 | 8925.57 |
| 581.1               | 9061.96          | 8643.15 | 8637.77 | 8637.3  | 8637.3  | 8637.3  | 8924.78 |
| 581                 | 8927.7           | 8643.03 | 8635.81 | 8635.46 | 8635.46 | 8635.46 | 8927.88 |
| 580.9               | 8790.56          | 8643.44 | 8633.95 | 8633.7  | 8633.7  | 8633.7  | 8935.13 |
| 580.8               | 8798.32          | 8644.39 | 8632.09 | 8631.9  | 8631.9  | 8631.9  | 8946.43 |
| 580.7               | 8984.26          | 8645.9  | 8630.11 | 8629.97 | 8629.97 | 8629.97 | 8961.59 |
| 580.6               | 8995.28          | 8648.26 | 8628.13 | 8628.03 | 8628.03 | 8628.03 | 8980.47 |
| 580.5               | 8749.46          | 8651.72 | 8626.22 | 8626.15 | 8626.15 | 8626.15 | 9002.7  |
| 580.4               | 8924.2           | 8656.44 | 8624.33 | 8624.27 | 8624.27 | 8624.27 | 9027.63 |
| 580.3               | 9146.04          | 8662.54 | 8622.31 | 8622.27 | 8622.27 | 8622.27 | 9054.38 |
| 580.2               | 8996.13          | 8670.29 | 8620.13 | 8620.1  | 8620.1  | 8620.1  | 9082.09 |
| 580.1               | 8895.8           | 8680.05 | 8617.8  | 8617.78 | 8617.78 | 8617.78 | 9109.9  |
| 580                 | 9033.6           | 8692.19 | 8615.31 | 8615.3  | 8615.3  | 8615.3  | 9136.96 |
| 579.9               | 9192.15          | 8707.17 | 8612.68 | 8612.67 | 8612.67 | 8612.67 | 9162.61 |
| 579.8               | 9136.42          | 8725.4  | 8609.82 | 8609.81 | 8609.81 | 8609.81 | 9186.34 |
| 579.7               | 9098.15          | 8747.45 | 8606.73 | 8606.73 | 8606.73 | 8606.73 | 9208.06 |
| 579.6               | 9338.29          | 8774.07 | 8603.56 | 8603.56 | 8603.56 | 8603.56 | 9228.19 |
| 579.5               | 9291.99          | 8805.93 | 8600.31 | 8600.31 | 8600.31 | 8600.31 | 9247.45 |
| 579.4               | 9241.9           | 8843.66 | 8596.9  | 8596.9  | 8596.9  | 8596.9  | 9266.87 |
| 579.3               | 9387.05          | 8888    | 8593.3  | 8593.31 | 8593.3  | 8593.3  | 9287.91 |
| 579.2               | 9304.29          | 8939.78 | 8589.56 | 8589.57 | 8589.56 | 8589.56 | 9312.36 |

| Binding energy (eV) | Intensity (a.u.) |         |         |         |         |         |         |
|---------------------|------------------|---------|---------|---------|---------|---------|---------|
|                     | LineA            | LineB   | LineC   | LineD   | LineE   | LineF   | LineG   |
| 579.1               | 9136.34          | 8999.76 | 8585.62 | 8585.64 | 8585.62 | 8585.62 | 9342.05 |
| 579                 | 9234.82          | 9068.73 | 8581.46 | 8581.48 | 8581.46 | 8581.46 | 9378.92 |
| 578.9               | 9402.25          | 9147.51 | 8577.1  | 8577.14 | 8577.1  | 8577.1  | 9424.9  |
| 578.8               | 9478.72          | 9236.72 | 8572.42 | 8572.5  | 8572.42 | 8572.42 | 9481.61 |
| 578.7               | 9537.51          | 9337.01 | 8567.44 | 8567.57 | 8567.43 | 8567.43 | 9550.55 |
| 578.6               | 9568.98          | 9448.92 | 8562.12 | 8562.35 | 8562.12 | 8562.12 | 9632.94 |
| 578.5               | 9734.42          | 9572.6  | 8556.26 | 8556.65 | 8556.26 | 8556.26 | 9729.43 |
| 578.4               | 9945.44          | 9708.13 | 8549.78 | 8550.42 | 8549.78 | 8549.78 | 9840.44 |
| 578.3               | 9904.99          | 9855.44 | 8542.71 | 8543.76 | 8542.71 | 8542.71 | 9966.1  |
| 578.2               | 10078.3          | 10014.1 | 8535.06 | 8536.75 | 8535.06 | 8535.06 | 10106.1 |
| 578.1               | 10462.9          | 10183.4 | 8526.75 | 8529.43 | 8526.75 | 8526.75 | 10259.6 |
| 578                 | 10483.8          | 10362   | 8517.77 | 8521.96 | 8517.77 | 8517.77 | 10425.6 |
| 577.9               | 10493.2          | 10548.3 | 8508.12 | 8514.61 | 8508.12 | 8508.12 | 10602.3 |
| 577.8               | 10654.7          | 10740.4 | 8497.74 | 8507.64 | 8497.74 | 8497.74 | 10787.8 |
| 577.7               | 10890.2          | 10935.5 | 8486.56 | 8501.46 | 8486.56 | 8486.56 | 10979.9 |
| 577.6               | 10962.4          | 11130.6 | 8474.46 | 8496.59 | 8474.46 | 8474.46 | 11175.7 |
| 577.5               | 10985.2          | 11322.5 | 8461.41 | 8493.86 | 8461.41 | 8461.41 | 11372.5 |
| 577.4               | 11296.8          | 11507.4 | 8447.52 | 8494.45 | 8447.52 | 8447.52 | 11567.7 |
| 577.3               | 11636.2          | 11681.4 | 8432.7  | 8499.68 | 8432.7  | 8432.7  | 11758.5 |
| 577.2               | 11898.5          | 11840.5 | 8416.88 | 8511.17 | 8416.88 | 8416.88 | 11942.4 |
| 577.1               | 12087            | 11980.6 | 8400.11 | 8531.06 | 8400.11 | 8400.11 | 12117.3 |
| 577                 | 12231.4          | 12098.2 | 8382.37 | 8561.75 | 8382.37 | 8382.37 | 12281.7 |
| 576.9               | 12461.2          | 12189.6 | 8363.66 | 8605.94 | 8363.66 | 8363.66 | 12435   |
| 576.8               | 12598            | 12252.1 | 8343.92 | 8666.53 | 8343.92 | 8343.92 | 12576.9 |
| 576.7               | 12648.9          | 12283.3 | 8323.13 | 8746.54 | 8323.13 | 8323.13 | 12708.3 |
| 576.6               | 12898.6          | 12282   | 8301.37 | 8848.87 | 8301.37 | 8301.37 | 12830.7 |
| 576.5               | 13001.5          | 12247.6 | 8278.67 | 8975.9  | 8278.67 | 8278.67 | 12945.6 |
| 576.4               | 13139.9          | 12180.5 | 8255.13 | 9129.15 | 8255.13 | 8255.13 | 13055.1 |
| 576.3               | 13469.3          | 12082   | 8230.86 | 9308.76 | 8230.86 | 8230.86 | 13160.3 |
| 576.2               | 13625            | 11954.3 | 8205.97 | 9512.92 | 8205.97 | 8205.97 | 13261.5 |
| 576.1               | 13813.2          | 11800   | 8180.5  | 9737.35 | 8180.5  | 8180.5  | 13357.1 |
| 576                 | 13782.4          | 11622.6 | 8154.54 | 9975.05 | 8154.54 | 8154.54 | 13443.3 |
| 575.9               | 13621.5          | 11426   | 8128.29 | 10216.3 | 8128.29 | 8128.29 | 13514.1 |
| 575.8               | 13644.2          | 11214   | 8101.8  | 10448.7 | 8101.8  | 8101.8  | 13561   |
| 575.7               | 13662            | 10991   | 8075.23 | 10658.1 | 8075.23 | 8075.23 | 13573.8 |
| 575.6               | 13525.9          | 10761   | 8048.88 | 10830   | 8048.88 | 8048.88 | 13542.2 |
| 575.5               | 13297.1          | 10528.1 | 8022.92 | 10951   | 8022.92 | 8022.92 | 13456.2 |
| 575.4               | 13262            | 10295.9 | 7997.55 | 11010.3 | 7997.55 | 7997.55 | 13308.6 |
| 575.3               | 13098.7          | 10067.4 | 7972.86 | 11001.4 | 7972.86 | 7972.86 | 13096   |
| 575.2               | 12705.4          | 9845.54 | 7948.94 | 10923.2 | 7948.94 | 7948.94 | 12819.8 |
| 575.1               | 12471.5          | 9632.65 | 7926.09 | 10780.3 | 7926.09 | 7926.09 | 12486.8 |
| 575                 | 12220.1          | 9430.64 | 7904.48 | 10581.8 | 7904.48 | 7904.48 | 12108   |
| 574.9               | 12018.4          | 9240.8  | 7884.12 | 10340.6 | 7884.12 | 7884.12 | 11697.3 |
| 574.8               | 11629.4          | 9064.11 | 7865.11 | 10071.2 | 7865.11 | 7865.11 | 11270.2 |
| 574.7               | 10992.8          | 8901.24 | 7847.62 | 9788.38 | 7847.62 | 7847.62 | 10842   |
| 574.6               | 10638.9          | 8752.35 | 7831.64 | 9505.63 | 7831.64 | 7831.64 | 10426.3 |
| 574.5               | 10477.1          | 8617.38 | 7817.2  | 9234.07 | 7817.2  | 7817.2  | 10034.2 |
| 574.4               | 10057.5          | 8496.11 | 7804.41 | 8982.18 | 7804.41 | 7804.41 | 9673.88 |
| 574.3               | 9635.95          | 8388    | 7793.22 | 8755.45 | 7793.22 | 7793.22 | 9350.23 |
| 574.2               | 9493.96          | 8292.45 | 7783.65 | 8556.83 | 7783.65 | 7783.65 | 9065.63 |
| 574.1               | 9074.29          | 8208.62 | 7775.59 | 8387    | 7775.59 | 7775.59 | 8820.03 |
| 574                 | 8608.74          | 8135.5  | 7768.81 | 8244.87 | 7768.81 | 7768.81 | 8611.56 |
| 573.9               | 8459.26          | 8072.17 | 7763.2  | 8128.34 | 7763.2  | 7763.2  | 8437.31 |
| 573.8               | 8249.02          | 8017.69 | 7758.63 | 8034.62 | 7758.63 | 7758.63 | 8293.68 |

| Binding energy (eV) | Intensity (a.u.) |         |         |         |         |         |         |
|---------------------|------------------|---------|---------|---------|---------|---------|---------|
|                     | LineA            | LineB   | LineC   | LineD   | LineE   | LineF   | LineG   |
| 573.7               | 8116.74          | 7971.14 | 7754.99 | 7960.63 | 7754.99 | 7754.99 | 8176.78 |
| 573.6               | 8020.11          | 7931.61 | 7752.13 | 7903.21 | 7752.13 | 7752.13 | 8082.69 |
| 573.5               | 7935.5           | 7898.29 | 7749.97 | 7859.43 | 7749.97 | 7749.97 | 8007.75 |
| 573.4               | 8059.16          | 7870.38 | 7748.39 | 7826.62 | 7748.39 | 7748.39 | 7948.6  |
| 573.3               | 7905.17          | 7847.01 | 7747.16 | 7802.31 | 7747.16 | 7747.16 | 7902.16 |
| 573.2               | 7835.46          | 7827.55 | 7746.2  | 7784.56 | 7746.2  | 7746.2  | 7865.91 |
| 573.1               | 7886.54          | 7811.47 | 7745.5  | 7771.82 | 7745.5  | 7745.5  | 7837.79 |
| 573                 | 7740             | 7798.15 | 7744.91 | 7762.73 | 7744.91 | 7744.91 | 7815.97 |
| 572.9               | 7802.51          | 7787.17 | 7744.4  | 7756.31 | 7744.4  | 7744.4  | 7799.08 |
| 572.8               | 7835.78          | 7778.13 | 7743.93 | 7751.79 | 7743.93 | 7743.93 | 7785.99 |
| 572.7               | 7649.18          | 7770.84 | 7743.62 | 7748.73 | 7743.62 | 7743.62 | 7775.95 |
| 572.6               | 7616.92          | 7764.95 | 7743.39 | 7746.67 | 7743.39 | 7743.39 | 7768.23 |

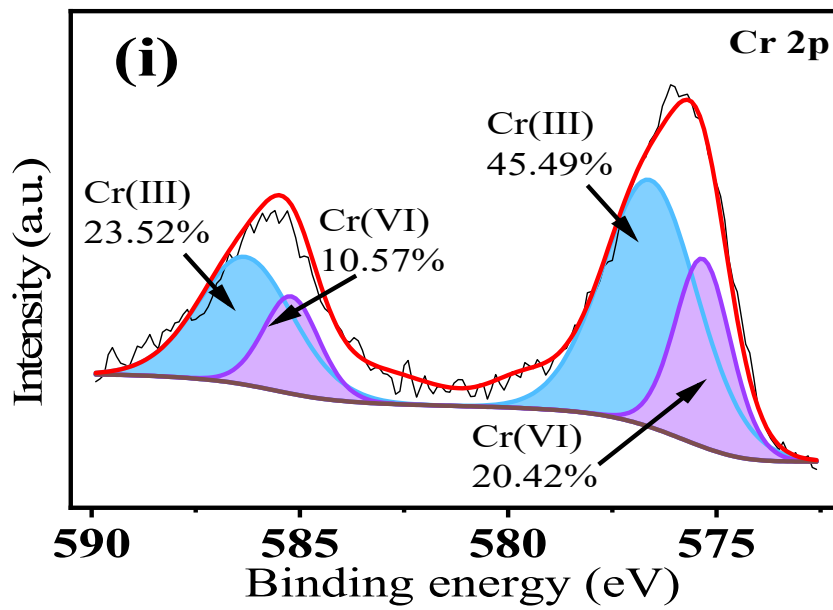

Supplement: d4ra02852j1.pdf [file d4ra02852j1.pdf]
